# Supplementary material for: Proteomic analysis of RAW macrophages treated with cGAMP or c-di-GMP reveals differentially activated cellular pathways
Source: RSC Adv. 2018 Nov 7;8(64):36840–51. doi: 10.1039/c8ra04603d (PMC9089301; doi:10.1039/c8ra04603d)
Supplement: RA-008-C8RA04603D-s001 [file RA-008-C8RA04603D-s001.xlsx]

## Sheet: Table S1
Table S1: Peptide sequence and intensity
Sequence	Mass	Leading razor protein	Gene names	Protein names	Charges	PEP	Score	Intensity CA_1_A	Intensity CA_2_A	Intensity CA_3_A	Intensity c-di-GMP_1_A	Intensity c-di-GMP_2_A	Intensity c-di-GMP_3_A	Intensity cGAMP_1_A	Intensity cGAMP_2_A	Intensity cGAMP_3_A	MS/MS Count
ETTVGAVTVTHK	1241.66	Q6P2B1	Tnpo3	Transportin-3	3	0.07766	20.585	0	2570500	0	0	0	0	0	0	0	2
AVDEAVILLQEIGVLDQR	1980.09	Q99PU8	Dhx30	Putative ATP-dependent RNA helicase DHX30	3	0.00099222	40.515	0	2624600	0	0	0	0	0	0	0	2
VEEIAAGK	815.439	Q3THJ0	Rpl18a	60S ribosomal protein L18a	2	0.013566	79.116	1984500	2643300	0	0	0	0	0	0	0	3
VLENAEGAR	957.488	P38647	Hspa9	Stress-70 protein, mitochondrial	2	0.0053839	83.265	3339200	2948400	0	0	0	0	0	0	0	2
CQYVTEK	926.417	Q5FWB7	Aldoa;Aldoc	Fructose-bisphosphate aldolase;Fructose-bisphosphate aldolase C;Fructose-bisphosphate aldolase A	2	0.036522	70.912	2517200	3008500	0	0	0	0	0	0	0	2
ITDDQQESLNK	1289.61	Q8BTU4	Ssb	Lupus La protein homolog	2	0.047261	46.891	0	3116700	0	0	0	0	0	0	0	2
WDQVEQDLADELITPQGYEK	2376.11	Q6RUT5	Tce7;Gnptg	N-acetylglucosamine-1-phosphotransferase subunit gamma	2	0.023013	34.685	0	3399500	0	0	0	0	0	0	0	2
AQHSEDDLEEVGK	1455.65	G3X9B1	Heatr1		3	0.025912	33.227	0	3558000	0	0	0	0	0	0	0	3
EVPAGPEELSWAAGPR	1664.82	Q9DC29	Abcb6	ATP-binding cassette sub-family B member 6, mitochondrial	2	0.0040222	63.727	5020300	3673000	0	0	0	0	0	0	0	3
AGFFGTIVEYGAER	1515.74	Q5U458	Dnajc11	DnaJ homolog subfamily C member 11	2	0.0022707	79.693	6383000	3719600	0	0	0	0	0	0	0	4
ADMVIEAVFEDLGVK	1634.82	Q8BMS1	Hadha	Trifunctional enzyme subunit alpha, mitochondrial;Long-chain enoyl-CoA hydratase;Long chain 3-hydroxyacyl-CoA dehydrogenase	2	0.00052158	75.045	6340300	4019500	0	0	0	0	0	0	0	2
GFGFVTMTNYEEAAMAIASLNGYR	2612.2	Q8BW03	Elavl1	ELAV-like protein;ELAV-like protein 1	2	0.0063183	40.237	3631800	4249200	0	0	0	0	0	0	0	2
QPTSEANCSAMFGK	1526.65	E9QPI5	Pds5a	Sister chromatid cohesion protein PDS5 homolog A	2	0.023398	51.927	0	4503000	0	0	0	0	0	0	0	2
DYAEACGDAAAAAR	1410.58	Q8BGX2		Uncharacterized protein C19orf52 homolog	2	0.00026306	83	5688200	4558000	0	0	0	0	0	0	0	2
SFADLIANLR	1118.61	E9Q467	Abcc4		2	0.022856	59.245	5345000	4643800	0	0	0	0	0	0	0	2
IDYNVEQSCVK	1353.62	F7CJY7	Stx16	Syntaxin-16	2	0.031796	51.762	0	4675400	0	0	0	0	0	0	0	3
IQEALTQQSQEQK	1529.77	Q0P6I6	Ccdc91	Coiled-coil domain-containing protein 91	2	0.00052554	79.741	5089700	5031400	0	0	0	0	0	0	0	2
LLAVAIGADCTYPELTDK	1948.98	Q9CSH3	Dis3	Exosome complex exonuclease RRP44	2	0.00018049	74.76	8132600	5084600	0	0	0	0	0	0	0	2
STAAMTSTVLTNTAPSK	1679.84	Q8VCF0	Mavs	Mitochondrial antiviral-signaling protein	2	0.0018435	67.456	0	5137500	0	0	0	0	0	0	0	3
YEFVVTSGSPVAADR	1596.78	Q8QZS3	Flcn	Folliculin	2	0.011789	63.408	5413000	5174300	0	0	0	0	0	0	0	2
TFGCGSAIASSSLATEWVK	1970.94	D3Z0K9	Iscu	Iron-sulfur cluster assembly enzyme ISCU, mitochondrial	2	0.010698	43.382	0	5355100	0	0	0	0	0	0	0	2
FFLSAGLIDK	1109.61	Q9DBS1	Tmem43	Transmembrane protein 43	2	0.069435	46.001	0	5643000	0	0	0	0	0	0	0	2
ALELEEFQNIGTSLGCDEAEPAAK	2591.21	Q80V79	Msh2	DNA mismatch repair protein Msh2	2	0.007717	38.511	0	5651200	0	0	0	0	0	0	0	2
QGFWEEFETLQQQECK	2085.91	P35235	Ptpn11	Tyrosine-protein phosphatase non-receptor type 11	2	0.054218	50.207	0	5657700	0	0	0	0	0	0	0	2
EQDWDQIQTIDSLLR	1858.91	Q3UAR8	Ammecr1l	AMMECR1-like protein	2	8.01e-05	87.363	8405200	5683200	0	0	0	0	0	0	0	4
QLANITMGLPLSPAADSAR	1925	Q920I9	Wdr7	WD repeat-containing protein 7	2	0.030896	62.14	0	5770100	0	0	0	0	0	0	0	2
VLDQYER	921.456	Q3TM87	Atg7	Ubiquitin-like modifier-activating enzyme ATG7	2	0.022401	81.297	6687600	5954500	0	0	0	0	0	0	0	2
EPTMQWQEDPEPEDENVYAK	2434.03	Q4VBC9	Ndufb11	NADH dehydrogenase [ubiquinone] 1 beta subcomplex subunit 11, mitochondrial	2	0.023013	34.685	6697500	5992300	0	0	0	0	0	0	0	3
SAFSVDTPEQCQAALQK	1878.88	Q6KAS0	Gemin5	Gem-associated protein 5	2	0.00092703	61.435	0	6066500	0	0	0	0	0	0	0	5
ELLSTSSSQSQCAER	1681.76	S4R1X1	Wdr91	WD repeat-containing protein 91	2	0.0052673	58.172	6608500	6108000	0	0	0	0	0	0	0	2
AAVSEAEAQFYEQNSR	1798.81	O88325	Naglu		2	0.0011078	62.924	8158800	6153500	0	0	0	0	0	0	0	2
ALAAAGYDVEKNNSR	1577.78	Q3U292	Hist1h1c;Hist1h1t;Hist1h1e;Hist1h1d	Histone H1.2;Histone H1t;Histone H1.4;Histone H1.3	2;3	1.41e-21	143.93	164180000	6206100	0	0	0	0	0	0	0	5
DLVEDQPFPGLLR	1497.78	D3YVC8	Rpusd3	RNA pseudouridylate synthase domain-containing protein 3	2	0.0033174	65.347	6664000	6461200	0	0	0	0	0	0	0	2
TLFFSPAPDSFDLEPVLDSFDLSR	2714.31	Q8BN64	Eefsec	Selenocysteine-specific elongation factor	2;3	0.0018231	64.394	4591000	6628500	0	0	0	0	0	0	0	2
GVVDEQASSAALK	1273.65	Q3TDD9	Ppp1r21	Protein phosphatase 1 regulatory subunit 21	2	0.0029637	67.113	0	6653600	0	0	0	0	0	0	0	2
NLYAFNLFCQK	1416.69	Q3TC98	Vps39;mKIAA0770	Vam6/Vps39-like protein	2	0.0041636	71.223	5915800	6656600	0	0	0	0	0	0	0	2
LPEGQLPEAELPAAQAAAGAGLK	2201.17	E9PYB0	Ahnak2		3	3.54e-06	51.029	7566200	6901600	0	0	0	0	0	0	0	3
EESQQMVLDIEDLDNIQTPESVLLSAVSGEDTQDR	3902.82	P23116	Eif3a	Eukaryotic translation initiation factor 3 subunit A	3	0.036567	16.068	5251400	6924500	0	0	0	0	0	0	0	2
ESVSSSETPISNGR	1448.67	Q6RSD4	Adcy7	Adenylate cyclase type 7	2	0.00028451	81.865	5385000	7100000	0	0	0	0	0	0	0	2
DVLEGYNGTIFAYGQTSSGK	2105.99	Q61768	Kif5b;mKIAA0531;Kif5c	Kinesin-1 heavy chain;Kinesin-like protein;Kinesin heavy chain isoform 5C	2	8.02e-05	66.533	0	7236800	0	0	0	0	0	0	0	2
IITVSSMLGVPAQEEAPAK	1940.03	Q8JZL3	Thtpa	Thiamine-triphosphatase	2	0.00011318	64.65	7344400	7311200	0	0	0	0	0	0	0	2
FSAQLEK	821.428	Q3V3U0	Pygb	Alpha-1,4 glucan phosphorylase;Glycogen phosphorylase, brain form	2	0.078932	56.547	5179600	7395500	0	0	0	0	0	0	0	2
NLSFFQLR	1023.55	Q05DR8	Ikbkb	Inhibitor of nuclear factor kappa-B kinase subunit beta	2	0.046707	58.981	0	7550300	0	0	0	0	0	0	0	2
RTEEEEEEPPDAQTAAK	1928.86	Q32MD7	Rgs10	Regulator of G-protein signaling 10	3	0.029044	34.498	7058100	7620800	0	0	0	0	0	0	0	2
EGDVLSQAAFPLSTSENVLSR	2219.11	E9QAH1	Golgb1		2	0.016144	35.891	7071300	7660700	0	0	0	0	0	0	0	2
IMESTQEDALHR	1428.67	E9QAH1	Golgb1		3	0.00094408	58.674	8577500	7711900	0	0	0	0	0	0	0	2
ADVTQETDPLCAECR	1763.75	Q149F1	Rpusd2	RNA pseudouridylate synthase domain-containing protein 2	2	0.0012294	67.385	6944600	7865600	0	0	0	0	0	0	0	2
VAELSATQCCK	1265.57	Q8N7N5	Dcaf8	DDB1- and CUL4-associated factor 8	2	0.0032132	73.985	6087400	8005100	0	0	0	0	0	0	0	2
LGEESKEPLSDEDEEDNDDVEPISEFR	3121.34	Q923F1	Clns1a		3	0.047312	23.566	7815100	8164500	0	0	0	0	0	0	0	3
DTEGLIQEINDLR	1514.76	Q3U417	Ppfibp1	Liprin-beta-1	2	0.00026194	110.38	0	8332000	0	0	0	0	0	0	0	2
EDLDVLGLSFR	1262.65	Q3TRC8	Arrb2	Beta-arrestin-2	2	0.0013674	79.974	0	8409000	0	0	0	0	0	0	0	2
EYYTQNMER	1232.51	Q8BHS3	Rbm22	Pre-mRNA-splicing factor RBM22	2	0.014592	68.224	8431600	8518300	0	0	0	0	0	0	0	2
DGILSDEIYCPPETAVLLGSYAVQAK	2808.39	Q4KML7	Ezr	Ezrin	2	5.3e-09	79.771	10978000	8569800	0	0	0	0	0	0	0	4
ENPCPEQGDVIQIK	1625.77	Q3UK41	Nelfa	Negative elongation factor A	2	0.0098017	55.353	11243000	8598900	0	0	0	0	0	0	0	5
GADILAYPPVVAGGNR	1568.83	B7ZMP1	Xpnpep3	Probable Xaa-Pro aminopeptidase 3	2	0.0026547	59.542	11853000	8831500	0	0	0	0	0	0	0	2
YFEAYLPQGTASSSNPSACLNPTVLEK	2943.4	Q80VJ3	Dnph1	2-deoxynucleoside 5-phosphate N-hydrolase 1	2	0.005817	44.601	0	8876400	0	0	0	0	0	0	0	2
PWPDATTYGAGSASR	1535.7	Q569Z6	Thrap3	Thyroid hormone receptor-associated protein 3	2	0.00028171	77.64	11859000	8880000	0	0	0	0	0	0	0	2
NDSPCGTTIGPILASR	1657.81	Q8CAJ7	Dnpep	Aspartyl aminopeptidase	2	0.011002	47.606	0	9094400	0	0	0	0	0	0	0	2
DLSLPPVDR	1010.54	Q11011	Npepps	Puromycin-sensitive aminopeptidase	2	0.0048891	85.212	0	9220700	0	0	0	0	0	0	0	2
ELVVNCCTEFIHLISSEANEICNK	2878.33	Q3UMQ2	Dr1	Protein Dr1	3	0.002966	38.583	10362000	9263100	0	0	0	0	0	0	0	2
MDASASAASVR	1064.49	Q8CG76	Akr7a2	Aflatoxin B1 aldehyde reductase member 2	2	0.00024556	102.06	9788600	9270900	0	0	0	0	0	0	0	5
LSELVQAVSDPSSPQYGK	1903.95	Q3U2Z6	Tpp1	Tripeptidyl-peptidase 1	2	0.00022672	70.412	11135000	9295200	0	0	0	0	0	0	0	5
EPELETTGTAGEGEAAAAGK	1887.87	Q6P9R1	Ddx51	ATP-dependent RNA helicase DDX51	2	0.013266	40.552	0	9324600	0	0	0	0	0	0	0	3
QIYNPPSGK	1002.51	O35841	Api5	Apoptosis inhibitor 5	2	0.028201	60.436	6544400	9763200	0	0	0	0	0	0	0	2
IIPMEQSYPMVVLGNK	1817.94	J9UUF7	5430435G22Rik;Rab7b	Ras-related protein Rab-7b	2	0.00042055	72.2	7907400	9887800	0	0	0	0	0	0	0	2
SVPATVDDDDDDNDPENR	1987.79	Q61687	Atrx	Transcriptional regulator ATRX	2	0.001961	53.967	8392700	9949800	0	0	0	0	0	0	0	2
GFAFVYFENVDDAK	1620.75	F8WJG3	Tra2b	Transformer-2 protein homolog beta	2	0.00023346	100.72	14204000	10007000	0	0	0	0	0	0	0	2
AAGTCGVLLR	1016.54	B1B1D8	Mrpl2	39S ribosomal protein L2, mitochondrial	2	0.010961	63.961	13697000	10069000	0	0	0	0	0	0	0	2
LTFLYLANDVIQNSK	1737.93	Q9CSU0	Rprd1b;Rprd1a	Regulation of nuclear pre-mRNA domain-containing protein 1B;Regulation of nuclear pre-mRNA domain-containing protein 1A	2	8.99e-07	140.24	16087000	10069000	0	0	0	0	0	0	0	2
YEDGIALLR	1048.56	D3YU58	Anapc7	Anaphase-promoting complex subunit 7	2	0.01754	64.265	0	10084000	0	0	0	0	0	0	0	2
CGEEIAVQFVDMVK	1623.76	Q61753	Phgdh	D-3-phosphoglycerate dehydrogenase	2	5.69e-07	121.08	14959000	10144000	0	0	0	0	0	0	0	3
GVGPLMAVGTR	1056.58	E9Q6J5	Bod1l		2	0.073843	43.808	0	10260000	0	0	0	0	0	0	0	2
AGQAIPGPPLGPILGQR	1640.94	Q9CQF0	Mrpl11	39S ribosomal protein L11, mitochondrial	2	0.037521	47.288	11958000	10900000	0	0	0	0	0	0	0	3
ATAPQTQHVSPMR	1422.7	Q80T06	Eef1d	Elongation factor 1-delta	3	0.0011002	63.76	2931200	10962000	0	0	0	0	0	0	0	2
AENGLLMTPCYTANFVAPEVLK	2437.2	P18654	Rps6ka1;Rps6ka2;Rps6ka3	Ribosomal protein S6 kinase;Ribosomal protein S6 kinase alpha-1;Ribosomal protein S6 kinase alpha-2;Ribosomal protein S6 kinase alpha-3	3	0.076162	14.944	13827000	10986000	0	0	0	0	0	0	0	2
LYPSESYLQNYEVAYPDCSPVHLISEASLVDLNTR	4041.93	Q922Q1	2018-03-02	Mitochondrial amidoxime reducing component 2	3	0.066703	8.7892	0	11141000	0	0	0	0	0	0	0	2
SSAIPDFRDPQK	1359.68	A0A087WNV1	Agfg1	Arf-GAP domain and FG repeat-containing protein 1	3	0.072182	31.348	0	11292000	0	0	0	0	0	0	0	2
AVLIDKDQTPK	1226.69	Q8QZS1	Hibch	3-hydroxyisobutyryl-CoA hydrolase, mitochondrial	3	0.0011495	78.653	12430000	11293000	0	0	0	0	0	0	0	2
LVLCEVFK	1006.55	V9GZG5	Glul	Glutamine synthetase	2	0.0094816	88.942	13828000	11359000	0	0	0	0	0	0	0	5
FVSLAELQ	905.486	Q6PEV0	Ephx1	Epoxide hydrolase 1	2	0.015587	74.517	9489000	11407000	0	0	0	0	0	0	0	4
LGQVSFDFPR	1164.59	Q920A7	Afg3l1	AFG3-like protein 1	2	0.035399	54.722	8017000	11513000	0	0	0	0	0	0	0	2
VMSNLDSNR	1034.48	Q545V2	S100a4	Protein S100;Protein S100-A4	2	0.013698	69.423	12318000	11790000	0	0	0	0	0	0	0	2
LLRPQGPS	866.497	A1ILG8	Vps13c	Vacuolar protein sorting-associated protein 13C	2	0.065394	90.777	0	11858000	0	0	0	0	0	0	0	2
GSGDTSNFDDYEEEEIR	1961.78	P68181	Prkacb	cAMP-dependent protein kinase catalytic subunit beta	2	0.00016524	72.496	12032000	11965000	0	0	0	0	0	0	0	2
NSLESMGVR	991.476	Q6PDI5	Ecm29	Proteasome-associated protein ECM29 homolog	2	0.013022	70.332	0	12281000	0	0	0	0	0	0	0	3
FLFPEGIK	949.527	Q8K009	Aldh1l2;Aldh1l1	Mitochondrial 10-formyltetrahydrofolate dehydrogenase;10-formyltetrahydrofolate dehydrogenase;Cytosolic 10-formyltetrahydrofolate dehydrogenase	2	0.0082659	91.906	17776000	12737000	0	0	0	0	0	0	0	2
MLPELFQDDEK	1363.63	D3YZ62	Myo5a	Unconventional myosin-Va	2	0.0076172	65.535	0	12795000	0	0	0	0	0	0	0	2
TFDTFCPLGPALVTK	1665.84	Q3TC72	Fahd2	Fumarylacetoacetate hydrolase domain-containing protein 2A	2	0.0015909	63.473	0	12950000	0	0	0	0	0	0	0	2
SLNYWSNLLGMK	1424.71	E9Q197	Glod4	Glyoxalase domain-containing protein 4	2	0.00023937	88.681	14399000	13685000	0	0	0	0	0	0	0	2
SLTLDGEEENGQVPLR	1755.86	E9PUG7	Eif2d	Eukaryotic translation initiation factor 2D	2	1.07e-07	122.51	0	13748000	0	0	0	0	0	0	0	3
SSLDLEVGEIASDGSIPTNK	2031	A1ILG8	Vps13c	Vacuolar protein sorting-associated protein 13C	2	3.46e-05	73.927	9368400	13796000	0	0	0	0	0	0	0	2
FECGEDEQVAEAE	1511.57	Q8K239	Tsfm	Elongation factor Ts;Elongation factor Ts, mitochondrial	2	0.0018632	72.607	11945000	14107000	0	0	0	0	0	0	0	2
LVVVDFSATWCGPCK	1737.82	P10639	Txn	Thioredoxin	2	5.87e-07	117.94	18143000	14116000	0	0	0	0	0	0	0	2
LLAQGLIK	854.559	Q14DS6	Lars2	Probable leucine--tRNA ligase, mitochondrial	2	0.026307	66.993	11854000	14652000	0	0	0	0	0	0	0	2
YESLELCR	1068.49	Q5SXR6	Cltc;mKIAA0034	Clathrin heavy chain;Clathrin heavy chain 1	2	0.0061368	100.39	19261000	14697000	0	0	0	0	0	0	0	2
NQVGDENWR	1116.49	Q8BFY9	Tnpo1	Transportin-1	2	0.0025786	94.302	16591000	14887000	0	0	0	0	0	0	0	2
SDVFEAWR	1008.47	O88325	Naglu		2	0.0043548	111.82	0	14920000	0	0	0	0	0	0	0	2
IQDGLGELK	971.529	Q3TPM3	Cul1	Cullin-1	2	0.0034126	83.168	0	14959000	0	0	0	0	0	0	0	10
GSDMESTQDQPVK	1420.61	Q3UJC3	Nmt1	Glycylpeptide N-tetradecanoyltransferase;Glycylpeptide N-tetradecanoyltransferase 1	2	1.01e-06	120.06	9006100	14964000	0	0	0	0	0	0	0	2
EAINQGMDEELER	1532.68	Q9D051	Pdhb	Pyruvate dehydrogenase E1 component subunit beta, mitochondrial	2	0.0022875	70.488	9242300	15140000	0	0	0	0	0	0	0	2
QVPDTSVQETDR	1373.64	Q9CZX9	Emc4	ER membrane protein complex subunit 4	2	3.72e-08	105.2	17080000	15489000	0	0	0	0	0	0	0	7
LPQGSLVPYQPDAVEK	1739.91	Q8R123	Flad1	FAD synthase;Molybdenum cofactor biosynthesis protein-like region;FAD synthase region	2	0.0008009	64.827	13079000	15637000	0	0	0	0	0	0	0	2
YEITEQR	937.451	Q3UCH0	Rpl6;Gm5428	60S ribosomal protein L6	2	0.022818	80.462	6588700	15704000	0	0	0	0	0	0	0	3
GDQLALLGR	941.529	Q545I6	Ctsz	Cathepsin Z	2	0.043012	56.011	0	15895000	0	0	0	0	0	0	0	2
YATLSLFNTYK	1319.68	S4R2J9	Prrc2c	Protein PRRC2C	2	1.34e-06	99.653	0	16238000	0	0	0	0	0	0	0	3
LLTDCNSETFQK	1454.67	E9PXG9	Vps53	Vacuolar protein sorting-associated protein 53 homolog	2	0.0076277	61.353	16827000	16255000	0	0	0	0	0	0	0	2
IPGEETDTIQHVK	1465.74	Q7TQD5	Cpt1a	Carnitine O-palmitoyltransferase 1, liver isoform	3	0.0052785	39.947	18178000	16318000	0	0	0	0	0	0	0	2
FCASGPYGGEDCPQWMVPITISTSEDPNQAK	3441.5	Q11011	Npepps	Puromycin-sensitive aminopeptidase	3	0.026161	23.368	13290000	16337000	0	0	0	0	0	0	0	2
NSVFSVLDEEITK	1479.75	B1ARU4	Macf1	Microtubule-actin cross-linking factor 1	2	1.76e-06	115	23924000	16442000	0	0	0	0	0	0	0	2
MSAEDIEK	921.411	Q9DB27	Mcts1	Malignant T-cell-amplified sequence 1	2	0.010347	86.833	11983000	16928000	0	0	0	0	0	0	0	3
ITEGVSDINSR	1189.59	Q3U1V6	Uevld	Ubiquitin-conjugating enzyme E2 variant 3	2	0.0067863	70.1	0	17017000	0	0	0	0	0	0	0	2
IGTEGQGFLIAMK	1363.72	Q9D7B6	Acad8	Isobutyryl-CoA dehydrogenase, mitochondrial	2	0.015584	52.725	16759000	17079000	0	0	0	0	0	0	0	2
VVLLTEVDK	1014.6	Q8BY26	Rfc3	Replication factor C subunit 3	2	0.044556	55.549	14350000	17180000	0	0	0	0	0	0	0	2
LAGMALTPADWQTVVK	1699.9	Q7TQ39	gag;Iap	IgE-binding protein	2	0.039254	58.274	15581000	17193000	0	0	0	0	0	0	0	2
FLDESLGEQVVK	1362.7	E9QK83	Utp20	Small subunit processome component 20 homolog	2	0.00038509	83.869	15277000	17240000	0	0	0	0	0	0	0	3
FQVTLYNPLGR	1306.7	Q3TBM1	Man2b1	Alpha-mannosidase;Lysosomal alpha-mannosidase	2	9e-05	110.87	22276000	17680000	0	0	0	0	0	0	0	2
ELPWPPAFEK	1212.62	Q8BU29	Dpp3		2	0.066072	46.39	0	17765000	0	0	0	0	0	0	0	2
ALQTTYGTNAPR	1291.65	Q8CG76	Akr7a2	Aflatoxin B1 aldehyde reductase member 2	2	6.64e-08	139.98	0	17882000	0	0	0	0	0	0	0	2
TDTQYLLK	980.518	O08800	Serpinb8	Serpin B8	2	0.005451	85.813	0	18149000	0	0	0	0	0	0	0	10
FDASAENVGIK	1149.57	E9PVX6	Mki67		2	0.010785	61.78	12623000	18395000	0	0	0	0	0	0	0	2
VMEAFEQAER	1208.55	Q99L69	Bckdha	2-oxoisovalerate dehydrogenase subunit alpha, mitochondrial	2	0.0025762	83.647	20848000	19041000	0	0	0	0	0	0	0	2
NNVAFMSYFLQGK	1517.73	O55029	Copb2	Coatomer subunit beta	2	5.97e-06	109.42	22978000	19364000	0	0	0	0	0	0	0	2
QLASEDISHITPTQGFNIK	2098.07	Q543P7	Arl3	ADP-ribosylation factor-like protein 3	3	0.0092763	36.816	0	19718000	0	0	0	0	0	0	0	2
DQGGFGDRNEYGSR	1556.66	Q3U0V1	Khsrp	Far upstream element-binding protein 2	3	0.001709	63.128	21228000	19955000	0	0	0	0	0	0	0	4
DTEGFQIGK	993.477	Q7TMY2	Acadsb	Short/branched chain specific acyl-CoA dehydrogenase, mitochondrial	2	0.0063487	79.469	18179000	20123000	0	0	0	0	0	0	0	6
DYLLMEEEFIR	1456.69	Q542I9	Psmc1	26S protease regulatory subunit 4	2	1.96e-05	125.56	23064000	20275000	0	0	0	0	0	0	0	5
QALEQYEGVK	1163.58	Q6A028	Swap70	Switch-associated protein 70	2	0.0026028	83.456	26409000	20277000	0	0	0	0	0	0	0	3
APSLQSEPLPR	1193.64	A0A0A6YWM5	Rab3gap2	Rab3 GTPase-activating protein non-catalytic subunit	2	0.00021996	98.055	17821000	20285000	0	0	0	0	0	0	0	5
LPENTPPCQQVDQPK	1749.84	Q9D0L8	Rnmt	mRNA cap guanine-N7 methyltransferase	2	9.99e-07	111.94	20410000	20495000	0	0	0	0	0	0	0	4
MTGESECLNPSAQSR	1665.71	A2RRK3	Slk	STE20-like serine/threonine-protein kinase	2	5.23e-10	133.32	0	20882000	0	0	0	0	0	0	0	3
WTIQYNK	951.481	Q3TW74	Mthfd1	C-1-tetrahydrofolate synthase, cytoplasmic;Methylenetetrahydrofolate dehydrogenase;Methenyltetrahydrofolate cyclohydrolase;Formyltetrahydrofolate synthetase;C-1-tetrahydrofolate synthase, cytoplasmic, N-terminally processed	2	0.02965	75.269	0	20884000	0	0	0	0	0	0	0	2
NLQDLVR	856.477	O54774	Ap3d1	AP-3 complex subunit delta-1	2	0.034588	72.138	0	21115000	0	0	0	0	0	0	0	2
DFFDAEIK	983.46	B9EIU1	Eprs	Bifunctional glutamate/proline--tRNA ligase;Glutamate--tRNA ligase;Proline--tRNA ligase	2	0.028857	64.567	18822000	21308000	0	0	0	0	0	0	0	3
LAADPDPNVK	1038.53	Q8CCX6	Vac14	Protein VAC14 homolog	2	0.0030976	79.893	0	22153000	0	0	0	0	0	0	0	2
DNYSPGWK	965.424	B9EIU1	Eprs	Bifunctional glutamate/proline--tRNA ligase;Glutamate--tRNA ligase;Proline--tRNA ligase	2	0.019346	73.616	28056000	22840000	0	0	0	0	0	0	0	2
ENLTELSGGQR	1202.59	Q3ULS2	Smc2	Structural maintenance of chromosomes protein;Structural maintenance of chromosomes protein 2	2	2.36e-05	124.74	0	23849000	0	0	0	0	0	0	0	3
NIDLVYK	863.475	Q3TWG5	Dync1li1	Cytoplasmic dynein 1 light intermediate chain 1	2	0.037466	69.383	24512000	25111000	0	0	0	0	0	0	0	4
VYFDLQIGDESVGR	1596.78	Q9DCY1	Ppib	Peptidyl-prolyl cis-trans isomerase;Peptidyl-prolyl cis-trans isomerase B	2	8.43e-05	113.38	35081000	25501000	0	0	0	0	0	0	0	2
IQTLPNQNQSQTQPLLK	1950.05	Q8CH18	Ccar1	Cell division cycle and apoptosis regulator protein 1	2	0.00046185	74.76	0	25503000	0	0	0	0	0	0	0	6
LGTITPDGADVYSYDEDDMVLDPSLAEHLSHFGIDMLK	4178.93	Q3U4W8	Usp5	Ubiquitin carboxyl-terminal hydrolase;Ubiquitin carboxyl-terminal hydrolase 5	4	0.080629	6.4651	22233000	26563000	0	0	0	0	0	0	0	2
MYSYPAR	886.401	Q3U6P5	Hnrnpc	Heterogeneous nuclear ribonucleoproteins C1/C2	2	0.024639	78.445	24883000	26831000	0	0	0	0	0	0	0	2
AMESIWK	863.421	O70145	Ncf2	Neutrophil cytosol factor 2	2	0.033168	73.039	0	27868000	0	0	0	0	0	0	0	3
SPLDSTAEPPAVR	1338.68	Q3V222	Sec24c		2	2.69e-13	136.52	26114000	28670000	0	0	0	0	0	0	0	5
YDYVLTGYTR	1249.6	Q8K183	Pdxk	Pyridoxal kinase	2	0.00033745	92.838	0	29501000	0	0	0	0	0	0	0	5
LESELANFGPR	1231.62	Q9CU62	Smc1a	Structural maintenance of chromosomes protein 1A	2	1.45e-22	149.94	0	29514000	0	0	0	0	0	0	0	7
EAIIPGSVYDR	1218.62	Q9EPU0	Upf1	Regulator of nonsense transcripts 1	2	0.00013618	101.65	34711000	29587000	0	0	0	0	0	0	0	2
DLPELALDTPR	1238.65	Q61823	Pdcd4	Programmed cell death protein 4	2	0.00035137	96.143	29231000	29693000	0	0	0	0	0	0	0	2
LAELQEQLK	1070.6	Q4G5Y4	Brd3;Brd4	Bromodomain-containing protein 3;Bromodomain-containing protein 4	2	0.0020624	98.904	35577000	30261000	0	0	0	0	0	0	0	3
AALETDENLLLCAPTGAGK	1942.97	Q6P4T2	Snrnp200	U5 small nuclear ribonucleoprotein 200 kDa helicase	2	8.36e-29	169.04	0	31126000	0	0	0	0	0	0	0	3
VESLSYQLLGLQK	1476.82	P21619	Lmnb2	Lamin-B2	2	3.12e-05	121.9	31949000	31271000	0	0	0	0	0	0	0	2
FIVNTLK	833.501	Q5SWN2	Rpa1	Replication protein A 70 kDa DNA-binding subunit;Replication protein A 70 kDa DNA-binding subunit, N-terminally processed	2	0.0015301	100.67	34724000	31848000	0	0	0	0	0	0	0	17
DEGWLAEHMLILGITNPAGK	2164.1	Q8BH04	Pck2	Phosphoenolpyruvate carboxykinase [GTP], mitochondrial	2;3	2.04e-06	79.633	0	31944000	0	0	0	0	0	0	0	3
ALDLDPSK	857.449	Q8BWT1	Acaa2	3-ketoacyl-CoA thiolase, mitochondrial	2	0.024847	68.383	28101000	32316000	0	0	0	0	0	0	0	2
CQLPDGSFR	1078.49	Q6P4T2	Snrnp200	U5 small nuclear ribonucleoprotein 200 kDa helicase	2	0.010219	73.665	0	32783000	0	0	0	0	0	0	0	6
DTPLYTDNTANGIALLWAPR	2201.11	Q99PV0	Prpf8	Pre-mRNA-processing-splicing factor 8	2;3	7.09e-12	131.26	12963000	33523000	0	0	0	0	0	0	0	2
VFTTGFSR	913.466	A2RS22	Coro1b	Coronin;Coronin-1B	2	0.053064	57.281	40578000	33642000	0	0	0	0	0	0	0	2
TVEMSPAYTEEELK	1625.75	Q8BRD3	Nucb1	Nucleobindin-1	2	0.0024391	64.64	0	33723000	0	0	0	0	0	0	0	3
DFSATDLTEFAAR	1442.67	Q8BWT1	Acaa2	3-ketoacyl-CoA thiolase, mitochondrial	2	0.0067477	60.691	35138000	33745000	0	0	0	0	0	0	0	2
LLESGDLSMNSIK	1405.71	O54774	Ap3d1	AP-3 complex subunit delta-1	2	4.12e-10	125.22	35811000	34540000	0	0	0	0	0	0	0	4
LQAALDNEAGGR	1213.61	Q8C290	Hnrnpu;Gm28062	Heterogeneous nuclear ribonucleoprotein U	2	0.012387	78.932	40145000	34624000	0	0	0	0	0	0	0	2
AGQTTYNGVTDCFR	1588.69	Q8C140	Slc25a13	Calcium-binding mitochondrial carrier protein Aralar2	2	1.51e-06	112.13	0	34972000	0	0	0	0	0	0	0	3
IMYDLTSKPPGTTEWE	1866.87	B2RRH9	Gmps	GMP synthase [glutamine-hydrolyzing]	2	8.35e-05	98.105	30867000	37331000	0	0	0	0	0	0	0	2
VPVDPATYGQFYGGDSYIILYNYR	2770.33	Q6PAC1	Gsn	Gelsolin	2;3	1.02e-06	89.648	0	37463000	0	0	0	0	0	0	0	4
FGEEIAR	820.408	Q80Y09	Pdcd6ip	Programmed cell death 6-interacting protein	2	0.0039567	141.98	37591000	39033000	0	0	0	0	0	0	0	2
TNVLGHLQQGGAPTPFDR	1906.96	P12382	Pfkl	ATP-dependent 6-phosphofructokinase, liver type	3	4.21e-08	84.581	0	39365000	0	0	0	0	0	0	0	2
LNPQEYLTSTACR	1551.74	Q3UNN4	Smarcc2;Smarcc1	SWI/SNF complex subunit SMARCC2;SWI/SNF complex subunit SMARCC1	2	7.73e-09	140.07	0	39845000	0	0	0	0	0	0	0	2
IEEELGSK	903.455	Q5FW97	EG433182;Eno1	Alpha-enolase	2	0.0018707	103.74	47573000	40107000	0	0	0	0	0	0	0	3
LNIMTAGSR	961.501	Q542K4	Cat	Catalase	2	0.00064846	121.85	35468000	41141000	0	0	0	0	0	0	0	2
GLITFESLEK	1135.61	Q9D3P8	Plgrkt	Plasminogen receptor (KT)	2	0.033978	55.461	0	43655000	0	0	0	0	0	0	0	4
GITGIEDK	831.434	P40142	Tkt	Transketolase	2	0.00019614	104.21	0	43669000	0	0	0	0	0	0	0	6
TLFSQLYEGK	1184.61	Q8C3J5	Dock2	Dedicator of cytokinesis protein 2	2	0.00027032	110.87	0	46843000	0	0	0	0	0	0	0	6
DIEDSIK	818.402	Q8C1X9	Anxa3	Annexin;Annexin A3	2	0.046161	64.803	0	48085000	0	0	0	0	0	0	0	2
NYLLQCTR	1066.52	Q3TRJ1	Vps35	Vacuolar protein sorting-associated protein 35	2	0.0064741	98.299	49430000	48919000	0	0	0	0	0	0	0	5
YTALVDQEEK	1194.58	G3X9L6	Gm10250;Atp5h	ATP synthase subunit d, mitochondrial	2	1.15e-07	158.76	42242000	50058000	0	0	0	0	0	0	0	2
QSEPFFK	881.428	Q790Y8	G6pdx;G6pd2	Glucose-6-phosphate 1-dehydrogenase;Glucose-6-phosphate 1-dehydrogenase X;Glucose-6-phosphate 1-dehydrogenase 2	2	0.02575	77.741	62827000	52033000	0	0	0	0	0	0	0	2
NEIASVAYR	1021.52	O70194	Eif3d	Eukaryotic translation initiation factor 3 subunit D	2	5.1e-13	138.54	0	66241000	0	0	0	0	0	0	0	22
TLNEADCATVPPAIR	1626.8	Q8K2B3	Sdha	Succinate dehydrogenase [ubiquinone] flavoprotein subunit, mitochondrial	2	2.83e-48	219.74	65271000	69470000	0	0	0	0	0	0	0	8
VEEAYDLAR	1064.51	O55234	Psmb5	Proteasome subunit beta type-5	2	0.0035052	90.657	0	70670000	0	0	0	0	0	0	0	2
DSDEADLVLAK	1174.57	Q9DCC5	Cbx3	Chromobox protein homolog 3	2	4.57e-05	120.12	0	73222000	0	0	0	0	0	0	0	3
GDIDVSVPK	928.487	E9Q616	Ahnak		2	0.0063162	79.596	0	78114000	0	0	0	0	0	0	0	2
FIPQMTAGK	991.516	P51174	Acadl	Long-chain specific acyl-CoA dehydrogenase, mitochondrial	2	0.0062621	79.809	0	93811000	0	0	0	0	0	0	0	5
FYGDLEKDK	1113.53	Q3UWP8	Calr	Calreticulin	2	8.61e-08	125.31	0	109560000	0	0	0	0	0	0	0	19
QIFGEATK	892.465	Q3UCD9	Ctsd	Cathepsin D	2	0.024847	68.383	0	113100000	0	0	0	0	0	0	0	2
ITNANELK	901.487	E9QKV6	Myo9b	Unconventional myosin-IXb	2	0.051081	57.811	0	157470000	0	0	0	0	0	0	0	2
ILIANTGMDTDK	1290.65	Q542X7	Cct2	T-complex protein 1 subunit beta	2	3.6e-05	99.568	0	172880000	0	0	0	0	0	0	0	3
EQLAIAEFAR	1146.6	P11983	Tcp1	T-complex protein 1 subunit alpha	2	1.02e-07	160.56	245300000	201970000	0	0	0	0	0	0	0	2
LSDGVAVLK	900.528	P63038	Hspd1	60 kDa heat shock protein, mitochondrial	2	1.04e-12	133.12	0	627740000	0	0	0	0	0	0	0	32
SLTSSDDAESSEPER	1608.68	E9Q6J5	Bod1l		2	0.011316	49.5	0	1311400	1865100	0	0	0	0	0	0	2
MIYASSK	798.395	Q544Y7	Dstn;Cfl1;Cfl2	Destrin;Cofilin-1;Cofilin-2	2	0.0489	63.306	0	3687400	2427600	0	0	0	0	0	0	2
LFLYQILR	1064.64	I6L9D3	Pctk2;Cdk17	Cyclin-dependent kinase 17	2	0.039304	60.961	0	4175100	2977300	0	0	0	0	0	0	3
AENEALAMQK	1103.53	Q3U9U5	Bcap31	B-cell receptor-associated protein 31	2	0.041038	52.716	0	2341900	3002500	0	0	0	0	0	0	2
CSNDSFSVIADYFGR	1736.75	Q91W86	Vps11	Vacuolar protein sorting-associated protein 11 homolog	2	0.0042925	59.57	5941000	3549800	3265100	0	0	0	0	0	0	3
DFLWPLPIIPASSISSPFK	2114.15	F6S7U1	Ric1	RAB6A-GEF complex partner protein 1	2	0.018368	53.967	0	0	3346600	0	0	0	0	0	0	2
DLMEAANIFLQHR	1556.78	J3QMC5	Mdn1		3	0.0012879	51.774	3514000	0	3638300	0	0	0	0	0	0	3
SPEPGPSAPGADAR	1307.61	Q8K4Q7	Cerk	Ceramide kinase	2	0.0044664	61.353	3183800	0	4029600	0	0	0	0	0	0	2
HEDELLAK	953.482	Q8VDD5	Myh9	Myosin-9	2	0.020899	72.138	2124400	0	4326300	0	0	0	0	0	0	2
VTTGGNQTGPNSSIR	1487.73	Q8VCF0	Mavs	Mitochondrial antiviral-signaling protein	2	0.0080774	54.143	0	5488400	4358800	0	0	0	0	0	0	2
ADDEYETSGEGQDIWDMLDK	2315.94	Q6P1B8	Tdp1	Tyrosyl-DNA phosphodiesterase 1	2	0.024673	33.685	0	5642200	4450900	0	0	0	0	0	0	2
DWDNSGPFCGTISNK	1696.72	B9EHZ5	Mpp6	MAGUK p55 subfamily member 6	2	0.005963	60.49	0	0	4534300	0	0	0	0	0	0	2
MTALAQDFAVNLGPK	1574.81	Q7TQD5	Cpt1a	Carnitine O-palmitoyltransferase 1, liver isoform	2	0.0022721	62.466	0	0	4548600	0	0	0	0	0	0	2
TLIGFFLAK	1008.6	P33609	Pola1	DNA polymerase alpha catalytic subunit	2	0.067291	48.756	0	0	4930900	0	0	0	0	0	0	2
LQLYFWK	996.543	Q3TC98	Vps39;mKIAA0770	Vam6/Vps39-like protein	2	0.050357	62.978	2631300	0	5015700	0	0	0	0	0	0	2
QICSCDGLTIWEER	1765.78	Q543K2	Ccs	Copper chaperone for superoxide dismutase	2	0.0072948	58.172	0	4021700	5074100	0	0	0	0	0	0	2
EQEMQECTTQIQYLK	1927.87	E0CYH0	Wtap	Pre-mRNA-splicing regulator WTAP	2	0.011421	58.676	0	4652000	5109300	0	0	0	0	0	0	2
TDEAAFQK	908.424	Q545V2	S100a4	Protein S100;Protein S100-A4	2	0.0038575	116.54	5666500	7069100	5117200	0	0	0	0	0	0	3
TEELKPQVEEK	1328.68	Q542W3	G3bp2	Ras GTPase-activating protein-binding protein 2	3	0.014742	54.471	0	5662800	5441200	0	0	0	0	0	0	2
GYILPEESYIHTNYQPAGIAVSDQPGNQTAVLDK	3687.81	Q6ZQF0	Topbp1	DNA topoisomerase 2-binding protein 1	3	0.067546	8.9128	0	0	5453100	0	0	0	0	0	0	3
LSTSQTPQQQVELFDFEK	2124.04	Q7TQD5	Cpt1a	Carnitine O-palmitoyltransferase 1, liver isoform	2	0.0010411	71.607	6936500	0	5549700	0	0	0	0	0	0	2
AELILLK	798.521	E0CYI9	Gcc2	GRIP and coiled-coil domain-containing protein 2	2	0.042706	66.993	10096000	0	5696500	0	0	0	0	0	0	2
ASALSEHISPVVVIPAEVSSPDSEPVLEK	2985.55	Q8VD75	Hip1	Huntingtin-interacting protein 1	3	0.001095	36.756	0	0	5787100	0	0	0	0	0	0	4
GMEFPSTYEVGPGQQLGSILK	2237.1	Q8R3F5	Mcat	Malonyl-CoA-acyl carrier protein transacylase, mitochondrial	2	0.016328	49.929	0	7191100	5859600	0	0	0	0	0	0	2
SYSGENTASAIAR	1325.62	A2AKG8	Focad	Focadhesin	2	0.00044116	82.417	0	5102600	5867600	0	0	0	0	0	0	2
LCSAHGVLVPGGFGVR	1624.85	P70698	Ctps1	CTP synthase 1	2	5.02e-05	82.171	0	0	5952000	0	0	0	0	0	0	2
GEESESFLNPELLETSR	1935.91	P97868	Rbbp6	E3 ubiquitin-protein ligase RBBP6	2	0.00085625	74.326	0	6775900	6050100	0	0	0	0	0	0	2
LLLFAIQR	972.612	E9PXG9	Vps53	Vacuolar protein sorting-associated protein 53 homolog	2	0.010642	86.113	3131700	0	6057700	0	0	0	0	0	0	2
QLHQSCQTDDGEDDLK	1887.79	A2AQE4	Cops2	COP9 signalosome complex subunit 2	3	0.072726	16.88	2484100	0	6083500	0	0	0	0	0	0	2
CAIQNAPNPGGGDLQK	1638.78	Q811J3	Ireb2	Iron-responsive element-binding protein 2	2	0.00088623	63.408	0	0	6160700	0	0	0	0	0	0	2
LGQLSCALCNTPVK	1559.78	Q8R1N0	Znf830;Zfp830	Zinc finger protein 830	2	0.027996	48.004	0	0	6284400	0	0	0	0	0	0	2
NLCWGSQSQPLYETVEDNDVK	2481.11	Q9D0G0	Mrps30	28S ribosomal protein S30, mitochondrial	2	0.0010399	47.666	9794100	8637700	6299100	0	0	0	0	0	0	4
LMSQGYSYQDIQK	1559.73	P22682	Cbl	E3 ubiquitin-protein ligase CBL	2	0.018106	50.452	0	0	6309100	0	0	0	0	0	0	3
GHLDAELDAYMAQTDPETND	2204.92	B7ZMS6	Chtop	Chromatin target of PRMT1 protein	2	0.0014285	47.712	0	3078700	6323800	0	0	0	0	0	0	2
EAAEAEADVPVFQYVGER	1978.93	Q548B0	Wbscr16	Williams-Beuren syndrome chromosomal region 16 protein homolog	2	0.0014157	59.57	0	6105000	6330500	0	0	0	0	0	0	4
YLTGTYVQEESPEGGR	1784.82	A0A087WRF2	Agap1;Agap3	Arf-GAP with GTPase, ANK repeat and PH domain-containing protein 1;Arf-GAP with GTPase, ANK repeat and PH domain-containing protein 3	2	8.59e-06	97.911	0	0	6363100	0	0	0	0	0	0	2
EAELLQDPNGLSADIIER	1982	Q3UWY4	Lrch1	Leucine-rich repeat and calponin homology domain-containing protein 1	2	0.0015152	74.46	0	0	6415600	0	0	0	0	0	0	2
LETYYNATEPVISFYDK	2051.97	Q9R0Y5	Ak1	Adenylate kinase isoenzyme 1	2	0.00023582	69.451	0	8048100	6641900	0	0	0	0	0	0	2
NQDECIVALHDCNGDVNK	2099.9	A2AMY5	Ubap2	Ubiquitin-associated protein 2	2	0.011717	44.616	0	0	6698200	0	0	0	0	0	0	3
MSLASCGTDWDIVR	1609.72	Q6A0A1	mKIAA0224;Dhx38		2	0.002204	66.267	0	6477300	6734700	0	0	0	0	0	0	2
TFFPEYTHQLFGDDETAFGYK	2512.12	Q8BY71	Hat1	Histone acetyltransferase type B catalytic subunit	2	4.38e-05	70.412	0	0	6768600	0	0	0	0	0	0	2
EQGGNEELVGPDPEPVPAQPQK	2314.11	Q69Z99	Znf512	Zinc finger protein 512	2	0.0086285	40.552	0	7319000	6842900	0	0	0	0	0	0	5
AQMQEAMTQEVSDVFSDTTTPIK	2556.17	Q64727	Vcl	Vinculin	2;3	0.00013547	74.816	14396000	10442000	6876300	0	0	0	0	0	0	2
ENGFGLAECCR	1311.53	Q4JG03	Huwe1	E3 ubiquitin-protein ligase HUWE1	2	0.017674	58.37	0	9179900	7091800	0	0	0	0	0	0	2
GTMDDISQEEGSSQGEESVSGSQR	2499.03	Q9CU62	Smc1a	Structural maintenance of chromosomes protein 1A	2	0.00016202	54.7	6594300	0	7109200	0	0	0	0	0	0	2
ICPTPNNQFMMGGR	1621.72	Q91YX7	Rasa1		2	0.010634	54.416	0	7528000	7130500	0	0	0	0	0	0	3
KVLTGVAGEDAECHAAK	1754.86	Q9EPL8	Ipo7	Importin-7	3;4	0.079967	20.368	0	0	7179600	0	0	0	0	0	0	2
ALEFIPSDQQNEMVR	1775.85	Q3TRI4	Pum1		2	0.016433	59.542	7523300	0	7213500	0	0	0	0	0	0	2
GDVSISVEEGKENLLR	1743.9	B9EIU1	Eprs	Bifunctional glutamate/proline--tRNA ligase;Glutamate--tRNA ligase;Proline--tRNA ligase	3	0.0016467	59.261	0	0	7268700	0	0	0	0	0	0	3
LLAGEGPDLLVYNLDLGGHLR	2234.21	Q8R539	Wdr6	WD repeat-containing protein 6	3	0.00027341	36.523	0	5738700	7272900	0	0	0	0	0	0	2
IEAASMSGAGR	1048.5	Q91ZX7	Lrp1	Prolow-density lipoprotein receptor-related protein 1;Low-density lipoprotein receptor-related protein 1 85 kDa subunit;Low-density lipoprotein receptor-related protein 1 515 kDa subunit;Low-density lipoprotein receptor-related protein 1 intracellular domain	2	0.0041202	71.349	0	4521900	7273500	0	0	0	0	0	0	2
ADLEPESFRPNLSDPSELLLPDQIEK	2951.48	E9Q0A7	Oxr1	Oxidation resistance protein 1	3	5.23e-05	39.626	20707000	7829000	7374500	0	0	0	0	0	0	3
VAFQEVNSGCTGK	1395.65	Q3U461	Rin2	Ras and Rab interactor 2	2	0.00065173	78.655	7781500	6957600	7439800	0	0	0	0	0	0	4
LFLEGFR	880.481	G3X9K3	Arfgef1	Brefeldin A-inhibited guanine nucleotide-exchange protein 1	2	0.020401	85.306	0	8116400	7598300	0	0	0	0	0	0	2
TSEAESLCTQSLK	1452.68	F8VPK0	Ttc37		2	0.00069691	77.744	0	0	7615400	0	0	0	0	0	0	2
IQDTGDTILSSPSSVALPQVK	2155.14	E0ZPU5	Nr3c1	Glucocorticoid receptor	2	0.020194	32.734	0	5868500	7679200	0	0	0	0	0	0	2
LQQLKDETGELSSADEK	1889.92	Q9EPU0	Upf1	Regulator of nonsense transcripts 1	2	0.01422	59.57	0	0	7741100	0	0	0	0	0	0	2
GFVDDIIQPSSTR	1433.72	A0PJE6	Pccb	Propionyl-CoA carboxylase beta chain, mitochondrial	2	1.86e-05	104.82	15688000	10893000	7756700	0	0	0	0	0	0	3
ELSESVQQQSAPVPLISPK	2036.08	A2A485	Zmynd8		2	0.060603	29.689	4865800	0	7791800	0	0	0	0	0	0	3
GIAAQPLYTGYCNYENK	1960.9	Q3TXR9	Hexb	Beta-hexosaminidase;Beta-hexosaminidase subunit beta	2	0.020626	54.143	9527000	4970100	7923900	0	0	0	0	0	0	3
ITSFVIPEPSLTSQTVQEVSR	2317.22	E9PUG7	Eif2d	Eukaryotic translation initiation factor 2D	2	0.049092	39.219	0	0	7950900	0	0	0	0	0	0	2
LGQPLLNENPQLTEGWEIPK	2275.18	Q3TKH5	Zcchc8	Zinc finger CCHC domain-containing protein 8	2	0.006563	56.122	0	9442700	8009100	0	0	0	0	0	0	6
TQAPSYLQQNGVQNYMK	1968.94	Q2M4H5	Cul5	Cullin-5	2	0.040702	38.021	7808500	0	8159600	0	0	0	0	0	0	2
EGGHSDWLGDPEEPLTGFSWR	2371.05	E9PYT3	Atl3	Atlastin-3	2	5.36e-10	99.011	0	0	8216400	0	0	0	0	0	0	3
IQSLGLGEDWSVDGGPAAAGGGQK	2269.1	Q3UE11	Plod1	Procollagen-lysine,2-oxoglutarate 5-dioxygenase 1	2;3	0.0010437	46.746	0	0	8307400	0	0	0	0	0	0	3
VNEDSGDTHGEDAVVILEK	2025.95	Q9DAR7	Dcps	m7GpppX diphosphatase	2	0.0028604	51.211	0	0	8349200	0	0	0	0	0	0	2
ESNQQLDLSACR	1419.64	B2RXR1	Ccdc88b	Coiled-coil domain-containing protein 88B	2	0.0038992	65.347	0	0	8385800	0	0	0	0	0	0	4
VLELEECLGTR	1317.66	E9PUA5	Kifc5b;Kifc1	Kinesin-like protein;Kinesin-like protein KIFC1	2	0.018924	57.785	0	0	8413200	0	0	0	0	0	0	2
IETSINLAWTAGSNNTR	1846.92	Q3TX38	Vdac3	Voltage-dependent anion-selective channel protein 3	2	0.00032593	65.563	5331700	3965300	8432500	0	0	0	0	0	0	3
AVINTVPYDVVHR	1481.8	Q91ZE0	Tmlhe	Trimethyllysine dioxygenase, mitochondrial	2	0.018293	50.284	7803100	5671900	8514600	0	0	0	0	0	0	3
GDARPAEIDSLWEISK	1785.89	D3YUM1	Ndufv1	NADH dehydrogenase [ubiquinone] flavoprotein 1, mitochondrial	3	0.0013383	47.204	0	0	8600500	0	0	0	0	0	0	3
NKEDQYEHLDAADVTK	1874.86	Q3U2G2	Hspa4	Heat shock 70 kDa protein 4	2	0.00195	76.522	0	0	8641500	0	0	0	0	0	0	3
IEGLLCDVTLVPGDGEEIFPVHR	2564.29	Q8C7P1	Klhl9	Kelch-like protein 9	3	0.00012653	33.79	9292000	0	8653200	0	0	0	0	0	0	2
ISFNSYELGSLQVEDEASQPFCAVK	2817.32	Q53YN4	Prkcd	Protein kinase C delta type;Protein kinase C delta type;Protein kinase C delta type regulatory subunit;Protein kinase C delta type catalytic subunit	3	0.059851	17.076	8784200	9236400	8697800	0	0	0	0	0	0	3
ANAPCVIFIDELDSVGGK	1903.93	O88967	Yme1l1	ATP-dependent zinc metalloprotease YME1L1	2	4.31e-05	76.588	11840000	0	8739600	0	0	0	0	0	0	3
GDLFASTFLIK	1210.66	Q810B6	Ankfy1	Rabankyrin-5	2	0.043859	55.567	0	7406800	8812000	0	0	0	0	0	0	2
LPGPAPDKPNVYDFK	1656.85	Q9CY97	Ssu72	RNA polymerase II subunit A C-terminal domain phosphatase SSU72	2	0.029518	61.435	0	0	9001400	0	0	0	0	0	0	2
TVVPCCSGPK	1103.51	Q8VDC3	aco1;Aco1	Aconitate hydratase;Cytoplasmic aconitate hydratase	2	0.033105	55.549	0	5409400	9021400	0	0	0	0	0	0	2
VFFPQDLLVQYR	1523.81	Q8BTE4	Tefm	Transcription elongation factor, mitochondrial	2	0.0013798	89.247	0	0	9048300	0	0	0	0	0	0	4
LATVAQGEEESASR	1446.7	E0CYI9	Gcc2	GRIP and coiled-coil domain-containing protein 2	2	0.013811	64.439	0	6498400	9080600	0	0	0	0	0	0	2
LLEEEGVSLTELEPAPLDGLTSSVSAEEPSSHR	3477.7	Q7TMW6	Narfl	Cytosolic Fe-S cluster assembly factor NARFL	3	0.047876	14.374	0	0	9096700	0	0	0	0	0	0	3
LETMNQCWESVLQK	1764.82	B1ARU4	Macf1	Microtubule-actin cross-linking factor 1	2	0.00023118	84.687	10802000	10167000	9125800	0	0	0	0	0	0	2
KYEEIDNAPEER	1491.68	Q8BFR5	Tufm;Gm9755	Elongation factor Tu, mitochondrial;Elongation factor Tu	3	0.0074625	41.476	11943000	0	9142500	0	0	0	0	0	0	2
VQAELEEAR	1043.52	P21619	Lmnb2	Lamin-B2	2	0.0047572	85.731	0	5855900	9152100	0	0	0	0	0	0	2
FPSSGLATPQPTALTFAK	1832.97	I6L970	Aup1	Ancient ubiquitous protein 1	2	0.00060766	61.375	0	11383000	9207100	0	0	0	0	0	0	2
ISDTGLASGTGPEK	1331.66	B9EKS2	Kdm3b		2	2.56e-05	100.04	10437000	9289100	9226200	0	0	0	0	0	0	4
QAAAAAASTSVKPIFSR	1674.91	Q9CQZ5	Ndufa6	NADH dehydrogenase [ubiquinone] 1 alpha subcomplex subunit 6	2	0.00049733	80.522	0	0	9338600	0	0	0	0	0	0	3
NVLVIGTTGSQTTFLPEGELPECAR	2688.34	A2ADY9	Ddi2	Protein DDI1 homolog 2	3	5.66e-07	50.215	9798700	0	9350900	0	0	0	0	0	0	2
GPAGNDDEESSDSTPLLPGAR	2083.93	Q8BN82	Slc17a5	Sialin	2	0.00061425	54.524	9278000	12332000	9415000	0	0	0	0	0	0	4
VQQYPFTEDQEIPETDWEVYLR	2784.29	Q8BY26	Rfc3	Replication factor C subunit 3	2	0.00020797	59.871	0	0	9439500	0	0	0	0	0	0	2
IIHGQDFDQR	1227.6	Q3UE40	Gna13	Guanine nucleotide-binding protein subunit alpha-13	3	0.0030618	61.353	6757900	6932600	9625500	0	0	0	0	0	0	4
DIQDIYSIR	1121.57	A2AKG8	Focad	Focadhesin	2	0.013409	69.812	0	0	9711500	0	0	0	0	0	0	2
GPVPWHTINLDLPPYK	1845.98	Q78P93	Asah1	Acid ceramidase;Acid ceramidase subunit alpha;Acid ceramidase subunit beta	3	0.03821	22.154	0	0	9713100	0	0	0	0	0	0	2
NPDILVGENDLTALSYLHEPAVLHNLR	3012.57	D3YZ62	Myo5a;Myo5c	Unconventional myosin-Va	4	0.058266	17.369	0	0	9807500	0	0	0	0	0	0	2
FVTISGQK	878.486	B1ARU4	Macf1	Microtubule-actin cross-linking factor 1	2	0.033685	62.464	8741100	0	9809400	0	0	0	0	0	0	2
TLYLSVDPYMR	1356.67	Q3TXN1	Ptgr2	Prostaglandin reductase 2	2	0.0061855	65.347	8435600	12316000	9831300	0	0	0	0	0	0	3
NEINGNWISASTINEAR	1887.91	Q61823	Pdcd4	Programmed cell death protein 4	2	0.00017419	86.028	11568000	10346000	9891800	0	0	0	0	0	0	6
LESAELYAEAIK	1335.69	D3Z7C0	Mrpl40	39S ribosomal protein L40, mitochondrial	2	0.0088107	74.841	10630000	8285200	10044000	0	0	0	0	0	0	2
NSPPPSSYPSVENTGGAVAGPHPGGSLLPTDEGLPK	3482.7	Q3U4K3	Ndufv3		3	0.029105	18.867	11698000	0	10127000	0	0	0	0	0	0	4
ELATNLNVGTSSSAASSLK	1848.94	E9QAQ7	Arid1a	AT-rich interactive domain-containing protein 1A	2	0.011929	42.785	0	0	10154000	0	0	0	0	0	0	3
SAEALCLSEELAQAR	1646.79	B2RXR1	Ccdc88b	Coiled-coil domain-containing protein 88B	2	0.0017695	67.456	0	0	10163000	0	0	0	0	0	0	2
MSTETEETDGHLR	1504.65	Q8R5H1	Usp15	Ubiquitin carboxyl-terminal hydrolase 15	3	0.0077626	48.704	0	0	10223000	0	0	0	0	0	0	2
LVTADIITVENK	1314.74	Q91WU5	As3mt	Arsenite methyltransferase	2	0.0015626	74.944	13133000	0	10281000	0	0	0	0	0	0	2
SIDDTSNFDEFPESDILKPTVTTSSHPETDYK	3614.64	Q91VJ4	Stk38	Serine/threonine-protein kinase 38	4	0.014778	27.863	8568200	6863900	10295000	0	0	0	0	0	0	6
TNLYQDDAVTGEAAGLALGLVMLGSK	2606.33	Q3TXS7	Psmd1	26S proteasome non-ATPase regulatory subunit 1	3	4.07e-05	50.865	17786000	0	10424000	0	0	0	0	0	0	3
LFTTPPPVIK	1111.66	Q6NZL1	Dhx37		2	0.030028	58.596	9776300	6545800	10480000	0	0	0	0	0	0	2
DSVWGSGGGQQPVNHLVK	1863.92	Q61823	Pdcd4	Programmed cell death protein 4	2	0.00013018	70.488	10427000	0	10624000	0	0	0	0	0	0	2
DTLNPVAVPVSSPTATKPSPANTASPCTSNINPPR	3557.78	Q3UT02	Larp4	La-related protein 4	3	0.054093	16.512	0	0	10776000	0	0	0	0	0	0	2
WMGIAFR	879.443	Q8VDM6	Hnrnpul1	Heterogeneous nuclear ribonucleoprotein U-like protein 1	2	0.033832	72.618	12728000	0	10776000	0	0	0	0	0	0	3
DFEVVQTALR	1176.61	K3W4P2	Ints1	Integrator complex subunit 1	2	0.033105	55.549	0	37808000	10848000	0	0	0	0	0	0	2
AVPLEAVTGLSVTSGR	1555.86	Q5SUA5	Myo1g	Unconventional myosin-Ig	2	0.0056464	53.001	11998000	0	10961000	0	0	0	0	0	0	2
KDASDDLDDLNFFNQK	1883.85	Q3ULL5	Eif2s2	Eukaryotic translation initiation factor 2 subunit 2	2	2.78e-05	93.649	0	0	11205000	0	0	0	0	0	0	3
EELMAPTLLPELHLLK	1846.03	B7ZNX2	Anapc1	Anaphase-promoting complex subunit 1	3	0.060732	25.365	0	0	11207000	0	0	0	0	0	0	2
NLYTAMPLPIGR	1344.72	Q8CJG0	Ago2	Protein argonaute-2	2	0.0017962	73.985	8878300	7972700	11234000	0	0	0	0	0	0	2
SSADSLPGPISR	1185.6	Q69ZE0	Ncoa5	Nuclear receptor coactivator 5	2	0.0059186	66.056	0	0	11247000	0	0	0	0	0	0	5
NAIQLLASFLANNPFSCK	2007.02	Q8K2Z4	Ncapd2	Condensin complex subunit 1	3	9.3e-25	125.45	0	0	11427000	0	0	0	0	0	0	2
SEWSDLLNDLQK	1446.7	P47857	Pfkm	ATP-dependent 6-phosphofructokinase, muscle type	2	0.048984	65.719	11406000	0	11527000	0	0	0	0	0	0	2
LLVELNSVGPLVPGDLIAK	1946.15	B2RQ13	Pald1	Paladin	2	2.35e-06	81.431	0	0	11731000	0	0	0	0	0	0	3
KGPSTVTDLEETK	1403.71	Q6PEE6	Ap2a2	AP-2 complex subunit alpha-2	2	0.0023261	82.171	0	0	12003000	0	0	0	0	0	0	2
LAQALGLPYSEVIEASPDGTER	2315.16	Q14DS6	Lars2	Probable leucine--tRNA ligase, mitochondrial	2	5.15e-07	86.291	9247800	15548000	12070000	0	0	0	0	0	0	3
DFNEECPR	1065.42	O55222	Ilk	Integrin-linked protein kinase	2	0.0026486	127.84	10845000	13456000	12186000	0	0	0	0	0	0	3
VMLPGQCHYLGLPVADYFK	2207.09	Q8VC93	Eri3	ERI1 exoribonuclease 3	3	0.0022232	32.156	9160700	0	12201000	0	0	0	0	0	0	2
PLQIENIIDQEVQTLSGGELQR	2479.29	Q6NXX7	Abce1	ATP-binding cassette sub-family E member 1	3	1.4e-07	88.872	0	10675000	12271000	0	0	0	0	0	0	2
PLLVFVNPK	1025.63	A2AHJ7	Dgkz;Dgki	Diacylglycerol kinase;Diacylglycerol kinase zeta	2	0.0081434	76.035	0	0	12294000	0	0	0	0	0	0	2
VCGYDTPFPHIFEPFYIPDK	2441.14	Q6P3A8	Bckdhb	2-oxoisovalerate dehydrogenase subunit beta, mitochondrial	3	0.0095549	23.447	14011000	0	12605000	0	0	0	0	0	0	3
FTLQELR	905.497	Q9JJC6	Rilpl1;Rilpl2	RILP-like protein 1;RILP-like protein 2	2	0.022401	81.297	15625000	10796000	12658000	0	0	0	0	0	0	5
EEAEAQGVRDHESL	1568.71	P51859	Hdgf	Hepatoma-derived growth factor	2	0.027142	63.283	0	0	12732000	0	0	0	0	0	0	2
ATFYLNVLQQR	1351.72	Q9QXK3	Copg2	Coatomer subunit gamma-2	2	0.028096	53.493	0	0	12890000	0	0	0	0	0	0	2
VLTQPSQSAVR	1184.65	Q8C0L8	Cog5	Conserved oligomeric Golgi complex subunit 5	2	0.0001763	105.94	0	0	13080000	0	0	0	0	0	0	3
EPENEISSDCNHLLWNYK	2246.99	Q53WR6	Glg1	Golgi apparatus protein 1	3	0.038028	27.496	12447000	0	13093000	0	0	0	0	0	0	2
VGPTILNK	840.507	Q8QZS3	Flcn	Folliculin	2	0.028637	64.776	0	17292000	13210000	0	0	0	0	0	0	5
AQASEVLLEELQQSFSQAK	2105.06	O35551	Rabep1	Rab GTPase-binding effector protein 1	3	5.82e-05	44.788	0	0	13215000	0	0	0	0	0	0	2
IGIPSTSSEDTR	1261.62	Q14DS6	Lars2	Probable leucine--tRNA ligase, mitochondrial	2	0.0090674	60.434	15444000	0	13357000	0	0	0	0	0	0	2
TFQGHTNEVNAIK	1457.73	Q8BHJ5	Tbl1xr1;Tbl1x	F-box-like/WD repeat-containing protein TBL1XR1;F-box-like/WD repeat-containing protein TBL1X	2	0.00014357	91.855	0	0	13618000	0	0	0	0	0	0	2
SIICQIDTVEGSK	1448.72	Q5H8C4	Vps13a	Vacuolar protein sorting-associated protein 13A	2	0.00083771	77.062	0	0	13639000	0	0	0	0	0	0	2
SVDGPIRLPIVDK	1407.81	Q8R050	Gspt1	Eukaryotic peptide chain release factor GTP-binding subunit ERF3A	2	0.034621	75.695	0	0	13642000	0	0	0	0	0	0	2
ETLLAQPVEWKPSGTEQCQDASPLSVEGELLR	3566.76	J3QMC5	Mdn1		3	0.011933	29.377	0	0	13650000	0	0	0	0	0	0	3
ALLPELR	810.496	Q9DC23	Dnajc10	DnaJ homolog subfamily C member 10	2	0.074825	57.471	0	10155000	13693000	0	0	0	0	0	0	2
TAYLFSR	856.444	Q9CRT8	Xpot	Exportin-T	2	0.075671	57.281	13126000	12322000	13852000	0	0	0	0	0	0	3
EFGEDLVEQNSSYVQDSPSK	2257	Q9D0L8	Rnmt	mRNA cap guanine-N7 methyltransferase	2	3.39e-07	92.939	0	7780000	13897000	0	0	0	0	0	0	3
FSNNIISTFQNLYR	1715.86	Q6DID3	Scaf8	Protein SCAF8	2	0.009759	55.401	0	9757300	13992000	0	0	0	0	0	0	2
VLPIFYFAR	1124.64	E9Q9M5	Usp19	Ubiquitin carboxyl-terminal hydrolase;Ubiquitin carboxyl-terminal hydrolase 19	2	0.014444	68.422	0	0	13994000	0	0	0	0	0	0	3
ASEAGEVPFNHEILR	1667.83	D3Z0F5	Cops6	COP9 signalosome complex subunit 6	2	5.22e-05	91.313	0	0	14004000	0	0	0	0	0	0	2
GLCAECGQDLTQLQSK	1806.82	Q3U0S4	Ctdp1	RNA polymerase II subunit A C-terminal domain phosphatase	2	0.00065548	88.021	0	8337600	14007000	0	0	0	0	0	0	3
GGVTFLEDVLNEVQSR	1761.89	Q3U186	Rars2	Probable arginine--tRNA ligase, mitochondrial	2	1.59e-07	120.53	14180000	8931600	14095000	0	0	0	0	0	0	3
AAWGEETDYTPVWCMR	1970.83	P70697	Urod	Uroporphyrinogen decarboxylase	2	0.00043192	94.767	0	0	14184000	0	0	0	0	0	0	2
NQEDLLSEFGQFLPDANSSVLLSK	2650.31	Q60520	Sin3a	Paired amphipathic helix protein Sin3a	3	0.000512	46.403	0	0	14477000	0	0	0	0	0	0	2
STVDNTGLAQPPPHIPVTPNR	2210.14	Q5SSZ5	Tns3	Tensin-3	3	0.046187	14.107	15435000	0	14494000	0	0	0	0	0	0	2
AILTFALDSAEQK	1405.75	Q9CRA8	Exosc5	Exosome complex component RRP46	2	0.010456	57.348	0	0	14859000	0	0	0	0	0	0	2
MLMEDFSLSPEIILSCR	2039.97	Q53WR6	Glg1	Golgi apparatus protein 1	2	6.98e-13	140.31	0	14288000	14890000	0	0	0	0	0	0	2
SYALDKDVASAK	1266.65	Q6PB66	Lrpprc	Leucine-rich PPR motif-containing protein, mitochondrial	2	0.0015049	91.549	8167800	0	15073000	0	0	0	0	0	0	2
WQHDLFDSGFGGGAGVETGGK	2120.96	O08583	Alyref	THO complex subunit 4	2	7.39e-07	87.148	0	0	15178000	0	0	0	0	0	0	5
EIDLYQGAAQYENPPHIYALTDNMYR	3084.43	Q8CG29	Myo1f		3	0.028486	24.831	12553000	10904000	15183000	0	0	0	0	0	0	3
SNFELLEK	978.502	Q8C2G0	Ptk2b	Protein-tyrosine kinase 2-beta	2	0.053937	57.047	0	0	15193000	0	0	0	0	0	0	2
LNSKPQDLTDAYGPPSNFLEIDIFNPQTVGVGR	3601.81	Q6ZWQ5	Snx12	Sorting nexin-12	3	0.049461	19.375	0	0	15225000	0	0	0	0	0	0	2
IMMLSVLK	933.539	Q6P5E4	Uggt1	UDP-glucose:glycoprotein glucosyltransferase 1	2	0.068447	53.166	8450200	9059200	15235000	0	0	0	0	0	0	3
DNDFLNEGQK	1178.52	Q91XU2	Pip4k2b	Phosphatidylinositol 5-phosphate 4-kinase type-2 beta	2	1.02e-07	160.56	19503000	19895000	15594000	0	0	0	0	0	0	3
NTELDPVTTEEQVLDVK	1928.96	A2A7Y8	Mfn2	Mitofusin-2	2	0.0027828	62.924	9599500	9975200	15627000	0	0	0	0	0	0	4
AVTGYRDPYTEQTISLFQAMK	2418.19	Q9QXS1	Plec	Plectin	3	3.86e-10	69.763	0	0	15729000	0	0	0	0	0	0	3
EQLQLLPLFFK	1374.79	Q5SSW2	Psme4	Proteasome activator complex subunit 4	2	1.24e-06	98.033	14356000	0	15775000	0	0	0	0	0	0	5
IMALDIDER	1074.54	A2AQA7	Aqr	Intron-binding protein aquarius	2	0.0025786	94.302	14432000	15630000	15907000	0	0	0	0	0	0	3
FFPAMEALR	1080.54	Q8K0E9	Dhdh	Trans-1,2-dihydrobenzene-1,2-diol dehydrogenase	2	0.018061	63.565	0	13275000	16253000	0	0	0	0	0	0	2
VGMGSGSICITQEVLACGRPQATAVYK	2852.4	Q3UAT9	Impdh2	Inosine-5-monophosphate dehydrogenase;Inosine-5-monophosphate dehydrogenase 2	3	0.0018183	39.506	0	0	16481000	0	0	0	0	0	0	3
AQVLHVPAPFPGTPGQASPAAFPSK	2471.3	Q8BX02	Kank2	KN motif and ankyrin repeat domain-containing protein 2	3	0.074268	6.3637	15219000	0	16538000	0	0	0	0	0	0	2
GALVTVGQLSCYDQAK	1708.85	Q9QZD8	Slc25a10	Mitochondrial dicarboxylate carrier	2	0.0050612	72.29	14744000	0	16774000	0	0	0	0	0	0	3
DGSMNVSLK	949.454	A1ILG8	Vps13c	Vacuolar protein sorting-associated protein 13C	2	0.026677	60.892	0	16478000	16933000	0	0	0	0	0	0	2
SVDFYWLR	1084.53	Q9D0G0	Mrps30	28S ribosomal protein S30, mitochondrial	2	0.012618	90.986	15916000	14699000	17053000	0	0	0	0	0	0	2
LAAAFAVSR	904.513	Q99JY0	Hadhb	Trifunctional enzyme subunit beta, mitochondrial;3-ketoacyl-CoA thiolase	2	0.0053716	83.313	0	0	17424000	0	0	0	0	0	0	2
IPALNAYMK	1019.55	B6DT57	Ncf4	Neutrophil cytosol factor 4	2	0.0035351	82.671	17667000	19553000	17520000	0	0	0	0	0	0	2
LAEVGQYEQVK	1262.65	Q6ZQ08	Cnot1	CCR4-NOT transcription complex subunit 1	2	0.00028572	99.815	0	0	17727000	0	0	0	0	0	0	2
VEVNNLNNLNNHDR	1663.8	Q3UZD4	Eif4ebp2	Eukaryotic translation initiation factor 4E-binding protein 2	2;3	0.017999	54.143	11383000	0	18068000	0	0	0	0	0	0	3
FLDTDTICYR	1302.59	Q91YY4	Atpaf2	ATP synthase mitochondrial F1 complex assembly factor 2	2	0.0020446	87.476	0	18667000	18136000	0	0	0	0	0	0	2
FGTVLEALEK	1105.6	F6XC25	Cc2d1b	Coiled-coil and C2 domain-containing protein 1B	2	0.0029778	80.755	17667000	18326000	18785000	0	0	0	0	0	0	3
QAYIQLAK	933.528	Q3TSW9	Tfam	Transcription factor A, mitochondrial	2	0.032739	62.717	0	18799000	18885000	0	0	0	0	0	0	2
DLSAEELEAFQK	1378.66	Q9CQF0	Mrpl11	39S ribosomal protein L11, mitochondrial	2	0.00053619	79.16	19548000	0	19344000	0	0	0	0	0	0	4
SGSISSTELQQALSQMGYNLSPQFTQLLVSR	3369.69	Q8BFY6	Pef1	Peflin	3	2.96e-06	50.757	0	0	19379000	0	0	0	0	0	0	2
ALYEGYAAVTDAPPECFLTLR	2356.14	Q8BU29	Dpp3	Dipeptidyl peptidase 3	2;3	0.0084204	57.136	0	0	19500000	0	0	0	0	0	0	4
SSDPDYLVAVDK	1307.62	Q8K131	Glb1	Beta-galactosidase	2	0.00051155	79.693	19832000	17173000	19613000	0	0	0	0	0	0	3
NLLFGSGSWPR	1232.63	Q3TXV7	Hexa	Beta-hexosaminidase;Beta-hexosaminidase subunit alpha	2	0.0043946	70.552	24019000	0	19779000	0	0	0	0	0	0	2
DQMEGSPNSSESFEHIAR	2019.86	S4R2J9	Prrc2c	Protein PRRC2C	2;3	0.00095433	43.382	0	0	19799000	0	0	0	0	0	0	2
DSAGLLDPVLR	1154.63	Q9DCU6	Mrpl4	39S ribosomal protein L4, mitochondrial	2	0.00024546	102.07	18516000	0	20066000	0	0	0	0	0	0	2
WEQGQADYMGADSFDNIK	2073.87	V9GX26	Gyg;Gyg1	Glycogenin-1	2	3.83e-06	87.498	24896000	0	20618000	0	0	0	0	0	0	3
AYAEELAK	893.449	Q0VGQ1	Hsd17b12	Very-long-chain 3-oxoacyl-CoA reductase	2	0.025351	67.903	0	0	20635000	0	0	0	0	0	0	2
GEVLPEEVTEESLEESVGKPLYLIFR	2961.52	Q7TPD0	Ints3	Integrator complex subunit 3	3	1.95e-07	56.303	14448000	0	20831000	0	0	0	0	0	0	4
LLEASHAFEVSDTGNLIVSGK	2186.12	P19096	Fasn	Fatty acid synthase;[Acyl-carrier-protein] S-acetyltransferase;[Acyl-carrier-protein] S-malonyltransferase;3-oxoacyl-[acyl-carrier-protein] synthase;3-oxoacyl-[acyl-carrier-protein] reductase;3-hydroxyacyl-[acyl-carrier-protein] dehydratase;Enoyl-[acyl-carrier-protein] reductase;Oleoyl-[acyl-carrier-protein] hydrolase	3	0.0077221	15.946	17341000	0	21105000	0	0	0	0	0	0	2
AVLPEGQDVTSGFSR	1561.77	Q9D0C4	Trmt5	tRNA (guanine(37)-N1)-methyltransferase	2	0.0010048	71.085	0	0	21328000	0	0	0	0	0	0	5
VCALMSCAK	1038.47	Q3UDY1	Akr1b3;Akr1b1	Aldose reductase	2	0.018221	63.419	0	27880000	21582000	0	0	0	0	0	0	2
NAATEDLWESLESASGKPIAAVMNTWTK	3019.46	Q11011	Npepps	Puromycin-sensitive aminopeptidase	3	4.16e-08	64.289	0	0	21618000	0	0	0	0	0	0	2
ELGTLIPK	869.522	A2AEW0	Tfe3;Mitf;Tfec	Transcription factor E3;Transcription factor EC	2	0.02991	63.565	23015000	20883000	21732000	0	0	0	0	0	0	3
IMEVIDAITTTAQSHQR	1912.97	P12382	Pfkl	ATP-dependent 6-phosphofructokinase, liver type	3	2.9e-06	70.783	0	0	21889000	0	0	0	0	0	0	2
YGLKPPTL	887.512	Q3TSX8	Tomm70a	Mitochondrial import receptor subunit TOM70	2	0.054961	103.91	24469000	0	22382000	0	0	0	0	0	0	2
YDTDFYVLDKYPLAVRPFYTMPDPR	3081.49	Q3UJQ3	Dars	Aspartate--tRNA ligase, cytoplasmic	3;4	0.01939	33.074	0	0	22571000	0	0	0	0	0	0	2
GGGTVCTQLPSFWK	1536.74	D3Z512	Dnase2a;Dnase2	Deoxyribonuclease-2-alpha	2	3.44e-05	96.113	22583000	0	22677000	0	0	0	0	0	0	3
ETLLNGVGYLHEGLSPMER	2114.05	Q6P4T2	Snrnp200	U5 small nuclear ribonucleoprotein 200 kDa helicase	3	6.43e-07	76.768	17420000	0	23154000	0	0	0	0	0	0	2
SELDMLDIR	1090.53	F8WIT2	Anxa6	Annexin;Annexin A6	2	0.0062374	79.906	0	25061000	23311000	0	0	0	0	0	0	2
GPLTSCDFDLR	1279.59	Q8C147	Dock8	Dedicator of cytokinesis protein 8	2	0.000348	96.331	0	18551000	23377000	0	0	0	0	0	0	2
ELGTGQFGVVK	1133.61	P35991	Btk	Tyrosine-protein kinase BTK;Non-specific protein-tyrosine kinase	2	0.00065482	90.709	0	0	23951000	0	0	0	0	0	0	3
NQTQLNTSWLR	1359.69	F7AC41	Pus7		2	0.0054574	85.355	0	0	24301000	0	0	0	0	0	0	2
TVAISDAAQLPQDYCTTPGGTLFSTTPGGTR	3182.52	Q3UZD4	Eif4ebp2	Eukaryotic translation initiation factor 4E-binding protein 2	3	3.15e-06	49.967	32474000	27771000	24375000	0	0	0	0	0	0	2
ELEVMTAK	919.468	Q80Y35	Numa1		2	0.012054	82.671	19791000	0	24416000	0	0	0	0	0	0	2
MADPQSIQESQNLSMFLANHNK	2502.16	Q7TMB8	Cyfip1	Cytoplasmic FMR1-interacting protein 1	3	0.00024607	50.232	0	0	24613000	0	0	0	0	0	0	2
DVEFEVVGDSPEK	1448.67	Q9Z1F9	Uba2	SUMO-activating enzyme subunit 2	2	1.53e-06	116.55	21759000	28411000	24658000	0	0	0	0	0	0	4
SLVQNNCLSRPNIFLCPEIEPK	2627.32	Q3UID0	Smarcc2	SWI/SNF complex subunit SMARCC2	3	0.00034262	51.503	0	0	25189000	0	0	0	0	0	0	2
EVLASDLVVK	1071.62	Q922E1	Nnt	NAD(P) transhydrogenase, mitochondrial	2	0.032139	55.898	0	22892000	26101000	0	0	0	0	0	0	2
FIPGAALNSMTDMLDR	1750.84	Q8BIJ6	Iars2	Isoleucine--tRNA ligase, mitochondrial	2	0.028098	45.257	28975000	0	26510000	0	0	0	0	0	0	2
VAETAVQLFISGDK	1476.78	Q3TL10	Etf1	Eukaryotic peptide chain release factor subunit 1	2	5.06e-07	121.68	32113000	24845000	26685000	0	0	0	0	0	0	3
DIIGLAETGSGK	1159.61	Q4VBG1	Ddx47	Probable ATP-dependent RNA helicase DDX47	2	0.0023953	73.781	0	27344000	26818000	0	0	0	0	0	0	4
LLEATELK	915.528	B7ZWK3	Sptan1	Spectrin alpha chain, non-erythrocytic 1	2	0.012035	82.716	22684000	0	26887000	0	0	0	0	0	0	2
ASSEEFIPIFANNPR	1690.83	Q91W86	Vps11	Vacuolar protein sorting-associated protein 11 homolog	2	0.001179	67.93	37989000	0	27131000	0	0	0	0	0	0	2
LPDLETVIK	1026.6	D3Z512	Dnase2a;Dnase2	Deoxyribonuclease-2-alpha	2	0.010066	74.301	29235000	25489000	27392000	0	0	0	0	0	0	5
AVGDGILCNTYIDSYK	1787.84	Q61823	Pdcd4	Programmed cell death protein 4	2	1.64e-10	134.99	32096000	31704000	27486000	0	0	0	0	0	0	3
IEIDNGDELTADFLYDEVHPK	2432.14	Q91YR1	Twf1	Twinfilin-1	3	0.0041428	40.137	0	0	27602000	0	0	0	0	0	0	4
DQDILDLVSVLHDPETLLR	2190.15	Q3UPG1	Hmbs	Porphobilinogen deaminase	3	7.57e-07	66.325	0	0	28166000	0	0	0	0	0	0	2
ISMPDIDLHLK	1280.68	E9Q616	Ahnak		3	0.019296	46.592	17116000	19491000	28460000	0	0	0	0	0	0	3
FGFAIGSQTAR	1153.59	Q3KQH9	Pcnp	PEST proteolytic signal-containing nuclear protein	2	0.0065123	70.552	0	0	28764000	0	0	0	0	0	0	4
ILTCNGSVDDSR	1335.61	O89050	Mkln1	Muskelin	2	0.0021738	72.434	0	0	29274000	0	0	0	0	0	0	2
DLLNGVKPQDVDFATTATPTQMK	2489.25	Q8K1J6	Trnt1	CCA tRNA nucleotidyltransferase 1, mitochondrial	3	2.24e-08	68.552	35154000	28109000	29314000	0	0	0	0	0	0	3
FALDMAR	822.406	O55222	Ilk	Integrin-linked protein kinase	2	0.013549	89.673	0	28551000	29452000	0	0	0	0	0	0	3
LFNGTFLK	938.523	Q8C1Y8	Ccz1	Vacuolar fusion protein CCZ1 homolog	2	0.029204	64.236	0	26175000	29486000	0	0	0	0	0	0	2
LGMPQFLSTEAQSLLR	1789.94	Q3TIM6	Rps6ka1	Ribosomal protein S6 kinase;Ribosomal protein S6 kinase alpha-1	2	2.84e-05	89.189	0	0	30166000	0	0	0	0	0	0	2
NLPLGWDGKPIPYWLYK	2059.09	Q58E59	Sf3a3	Splicing factor 3A subunit 3	3	0.025368	37.438	0	0	30216000	0	0	0	0	0	0	2
LEDTAFQVLLALPLSK	1757	Q6PB66	Lrpprc	Leucine-rich PPR motif-containing protein, mitochondrial	2	1.87e-10	133.98	39382000	29303000	30850000	0	0	0	0	0	0	6
SYEAQDPEIASLSGK	1593.75	O35127	Grcc10	Protein C10	2	4.84e-05	91.858	0	27098000	31047000	0	0	0	0	0	0	2
SMVQFIGR	936.485	Q3UA17	Mtch2	Mitochondrial carrier homolog 2	2	0.0044369	111.04	0	23138000	31370000	0	0	0	0	0	0	2
TYLAVGSMK	968.5	T2HRB1	Itga4	Integrin alpha-4	2	0.0027961	88.819	0	34759000	33101000	0	0	0	0	0	0	6
SALCNADSPKDPVLPMK	1841.9	E9QPI5	Pds5a	Sister chromatid cohesion protein PDS5 homolog A	2;3	0.025487	55.426	0	0	33478000	0	0	0	0	0	0	2
LQEQVDTLR	1100.58	F6XLV1	E030010N08Rik		2	0.00046727	127.56	0	0	33488000	0	0	0	0	0	0	2
LAADFSVPLIIDIK	1513.88	E9QAI5	Cad	CAD protein;Glutamine-dependent carbamoyl-phosphate synthase;Aspartate carbamoyltransferase;Dihydroorotase	2	0.001588	85.845	26483000	0	34675000	0	0	0	0	0	0	2
AFNDPFIQK	1078.54	Q61699	Hsph1	Heat shock protein 105 kDa	2	0.00071126	94.114	0	0	35340000	0	0	0	0	0	0	12
GNLSWLR	844.456	Q62422	Ostf1	Osteoclast-stimulating factor 1	2	0.020874	84.359	26317000	21973000	35734000	0	0	0	0	0	0	5
ANSWWLR	931.466	Q9CWJ9	Atic	Bifunctional purine biosynthesis protein PURH;Phosphoribosylaminoimidazolecarboxamide formyltransferase;IMP cyclohydrolase	2	0.020376	85.357	0	22357000	36907000	0	0	0	0	0	0	2
LSQLEDQATR	1159.58	Q80Y35	Numa1		2	0.00010409	123.5	0	0	38168000	0	0	0	0	0	0	2
MMLDLNK	863.424	Q99JY0	Hadhb	Trifunctional enzyme subunit beta, mitochondrial;3-ketoacyl-CoA thiolase	2	0.019637	86.838	0	38937000	38258000	0	0	0	0	0	0	2
GLMPDGTSR	932.439	Q6P5I3	Adh5	S-(hydroxymethyl)glutathione dehydrogenase;Alcohol dehydrogenase class-3	2	0.033958	58.716	0	38975000	38781000	0	0	0	0	0	0	2
DTQDIVHDLESPGIDPSIIK	2191.1	B1ARU4	Macf1	Microtubule-actin cross-linking factor 1	3	6.39e-07	55.209	0	40208000	40321000	0	0	0	0	0	0	3
AQNELIWNIK	1227.66	Q921K2	Parp1	Poly [ADP-ribose] polymerase 1	2	0.0025455	99.139	0	0	40743000	0	0	0	0	0	0	2
SVQMFPR	863.432	Q3TXR9	Hexb	Beta-hexosaminidase;Beta-hexosaminidase subunit beta	2	0.018691	88.734	0	0	41027000	0	0	0	0	0	0	9
IQVSELCK	975.506	Q53WR6	Glg1	Golgi apparatus protein 1	2	0.00010232	127.12	35379000	33261000	41037000	0	0	0	0	0	0	4
ALETTVLSK	960.549	Q9D8T2	Gsdmdc1	Gasdermin-D	2	0.0037488	89.698	45665000	46281000	41113000	0	0	0	0	0	0	3
MLPPPPMWR	1123.57	J3QK23	Gm9825;Rnps1	RNA-binding protein with serine-rich domain 1	2	0.0081697	76.847	0	44096000	41297000	0	0	0	0	0	0	2
DISTLEPLKR	1170.66	Q3UW32	Anp32b	Acidic leucine-rich nuclear phosphoprotein 32 family member B	2	0.028998	74.486	37641000	0	41717000	0	0	0	0	0	0	2
IFGESEQAAPLIEQLIYEQATK	2477.27	Q7TQ39	gag;Iap	IgE-binding protein	3	1.03e-07	65.111	43727000	36945000	42271000	0	0	0	0	0	0	3
SAIDLEEMASGLNK	1476.71	P14576	Srp54;Srp54c	Signal recognition particle 54 kDa protein	2	1.08e-27	145.91	0	47016000	42821000	0	0	0	0	0	0	3
FQEFSDIVIPLIK	1547.86	Q6PDI5	Ecm29	Proteasome-associated protein ECM29 homolog	2	5.41e-05	94.692	41446000	39381000	44415000	0	0	0	0	0	0	3
EPDPEDAVGGSGEAEEHLIR	2105.95	P19973	Lsp1	Lymphocyte-specific protein 1	2;3	2.36e-10	103.9	45019000	45881000	48125000	0	0	0	0	0	0	5
IPTISTQLK	999.596	Q64727	Vcl	Vinculin	2	0.0013518	106.94	0	37591000	50352000	0	0	0	0	0	0	2
GSELQLPFQACLK	1489.76	Q99PV0	Prpf8	Pre-mRNA-processing-splicing factor 8	2	1.98e-27	150.27	0	0	51260000	0	0	0	0	0	0	3
IVILEYQPSK	1188.68	B2RSV4	Sf3b3	Splicing factor 3B subunit 3	2	0.00035347	108.98	53344000	0	54709000	0	0	0	0	0	0	3
ADVDASLPEVEGGVK	1484.74	E9Q616	Ahnak		2	2.23e-10	138.45	71351000	53511000	56388000	0	0	0	0	0	0	3
LFIIQACR	1019.56	P70677	Casp3	Caspase-3;Caspase-3 subunit p17;Caspase-3 subunit p12	2	0.0001705	105.27	0	0	56829000	0	0	0	0	0	0	7
SGVDVSLPK	900.492	E9Q616	Ahnak		2	0.046456	54.982	52570000	47141000	57562000	0	0	0	0	0	0	3
TPAGLAPTNLSSSR	1370.72	Q8BTI8	Srrm2	Serine/arginine repetitive matrix protein 2	2	7.42e-18	167.11	0	63877000	59585000	0	0	0	0	0	0	2
LCGILPAK	870.5	Q3TAH3	Npm3	Nucleoplasmin-3	2	0.0042214	113.08	55234000	0	60725000	0	0	0	0	0	0	3
AELNPWPEYINTR	1601.78	Q9D0R2	Tars	Threonine--tRNA ligase, cytoplasmic	2	3.23e-28	170.52	85701000	71738000	66082000	0	0	0	0	0	0	14
EAVTFLR	834.46	Q9D2G2	Dlst	Dihydrolipoyllysine-residue succinyltransferase component of 2-oxoglutarate dehydrogenase complex, mitochondrial	2	0.0079311	122.98	63834000	71399000	69363000	0	0	0	0	0	0	5
TVYFFSPWR	1201.59	Q3U4N8	Csf1r	Receptor protein-tyrosine kinase;Macrophage colony-stimulating factor 1 receptor	2	0.0019523	100.15	54531000	65997000	73616000	0	0	0	0	0	0	4
TPSCQDIVAGDMSK	1507.66	P19973	Lsp1	Lymphocyte-specific protein 1	2	3.46e-13	144.51	78462000	87177000	74499000	0	0	0	0	0	0	3
NVVVFDK	819.449	Q99KP6	Prpf19	Pre-mRNA-processing factor 19	2	0.036777	68.787	0	0	74844000	0	0	0	0	0	0	3
VLGIQVDTDGSGR	1315.67	Q8BQ03	Mcm5	DNA helicase;DNA replication licensing factor MCM5	2	8.98e-05	93.561	0	0	74854000	0	0	0	0	0	0	2
NIRTFLSTCCEK	1527.72	Q3U9E2	Vav1	Proto-oncogene vav	2	0.032065	68.016	93650000	0	78729000	0	0	0	0	0	0	2
ADLDISGTK	918.466	E9Q616	Ahnak		2	0.0054086	83.168	69176000	0	88997000	0	0	0	0	0	0	2
IDWPVGSPATIQYTGLDDHLSK	2412.2	Q9CQW1	Ykt6	Synaptobrevin homolog YKT6	2;3	4.74e-05	64.394	0	0	89044000	0	0	0	0	0	0	2
EYQTQLIQR	1177.61	Q9JHU4	Dync1h1	Cytoplasmic dynein 1 heavy chain 1	2	0.0044869	86.794	0	106050000	90964000	0	0	0	0	0	0	12
VPSVFTPAIDTK	1273.69	G3UXB4	Ctu2	Cytoplasmic tRNA 2-thiolation protein 2	2	0.0026661	70.412	66572000	0	98955000	0	0	0	0	0	0	4
TTNFAGILSQGLR	1376.74	Q921K2	Parp1	Poly [ADP-ribose] polymerase 1	2;3	2.06e-10	145.41	0	0	106040000	0	0	0	0	0	0	2
GLPFGCTK	878.432	Q9Z2X1	Hnrnpf	Heterogeneous nuclear ribonucleoprotein F;Heterogeneous nuclear ribonucleoprotein F, N-terminally processed	2	0.066249	53.754	0	106610000	110580000	0	0	0	0	0	0	3
EFGTNIK	807.413	Q91V38	Hsp90b1	Endoplasmin	2	0.046161	64.803	0	106700000	122030000	0	0	0	0	0	0	3
ISMQDVDLSLGSCK	1551.73	E9Q616	Ahnak		2	1.21e-17	162.93	149330000	117610000	136100000	0	0	0	0	0	0	3
DLPEHAVLK	1020.56	Q8C290	Hnrnpu;Gm28062	Heterogeneous nuclear ribonucleoprotein U	2	0.0020961	98.523	0	0	471020000	0	0	0	0	0	0	3
LEALELK	814.48	O09131	Gsto1	Glutathione S-transferase omega-1	2	0.017269	91.584	0	0	2499200000	0	0	0	0	0	0	3
THEAQIQEMR	1241.58	Q8VDD5	Myh9	Myosin-9	3	0.0030329	70.1	0	0	0	1546800	0	0	0	0	0	4
CGETGHVAINCSK	1431.62	Q3U935	Cnbp	Cellular nucleic acid-binding protein	3	0.078807	26.124	0	0	0	2378700	0	0	0	0	0	2
SQGSPEDPPSQASPGSNK	1768.79	Q6PGG2	Gmip	GEM-interacting protein	2	0.038189	35.204	0	0	0	2720000	0	0	0	0	0	2
LHISPDR	836.45	Q545F0	Mif	Macrophage migration inhibitory factor	2	0.046203	64.776	0	0	4081400	3112900	0	0	0	0	0	2
HFDETVNR	1016.47	Q5RKP4	Rpn1	Dolichyl-diphosphooligosaccharide--protein glycosyltransferase subunit 1	2	0.063276	54.549	2077800	0	0	3475400	0	0	0	0	0	2
QQCCEEDLDVSSK	1596.64	Q3TFK5	Gpatch4	G patch domain-containing protein 4	2	0.0032866	65.5	0	0	4061500	3483400	0	0	0	0	0	2
IFGLLMGTLQK	1219.7	Q3TUQ5	Pnn	Pinin	2	0.033283	51.066	0	3694000	0	3486900	0	0	0	0	0	2
AGVLLVCEPAGPVYTGGLR	1928.02	Q9D009	Lipt2	Putative lipoyltransferase 2, mitochondrial	2	0.00012163	63.537	6310100	5725200	5495000	3589600	0	0	0	0	0	4
DYENDEDVNKQLDR	1751.76	Q3U9K9	Trappc3	Trafficking protein particle complex subunit 3	2	0.0063532	77.062	0	0	5523200	3829000	0	0	0	0	0	4
IIEQPECSSPVIETER	1885.91	Q80V94	Ap4e1	AP-4 complex subunit epsilon-1	2	0.0079322	48.004	0	0	0	3999400	0	0	0	0	0	3
FGFIGFK	814.438	Q8R3C6	Rbm19	Probable RNA-binding protein 19	2	0.045436	65.263	0	0	0	4197200	0	0	0	0	0	3
GLLISQIAQEVGR	1382.79	Q9ESC4	Eral1;Era	GTPase Era, mitochondrial	2	0.00014357	91.855	4616600	5884300	0	4382300	0	0	0	0	0	3
LQDSSDPDTGSEEEVSSR	1936.81	H3BJU7	Arhgef2	Rho guanine nucleotide exchange factor 2	2	0.0029304	48.659	0	0	5424900	4460600	0	0	0	0	0	2
MVPIPAGVFTMGTDDPQIR	2044.01	E9Q0Z7	Sumf1	Sulfatase-modifying factor 1	2	0.00074272	57.802	0	0	5464200	4736300	0	0	0	0	0	2
NPQELGVFAPTPDLMELEK	2127.06	Q3U461	Rin2	Ras and Rab interactor 2	2	0.031656	33.204	0	3870300	0	4764200	0	0	0	0	0	2
NGPPPPNMTTNER	1423.65	Q8BZ56	Fli1	Friend leukemia integration 1 transcription factor	2	0.04579	44.309	0	0	5614400	4816200	0	0	0	0	0	2
TVGSGSGDQGGNVGLNDGPETR	2072.94	Q3UFM5	Nom1	Nucleolar MIF4G domain-containing protein 1	2	0.00032926	57.136	0	0	4058000	4882900	0	0	0	0	0	5
PFLLPVESVYSIPGR	1672.92	Q8BFR5	Tufm;Gm9755	Elongation factor Tu, mitochondrial;Elongation factor Tu	2;3	0.0036353	52.265	11272000	0	2295800	4989400	0	0	0	0	0	4
LQLWAFK	904.517	Q6P9Q4	Fhod1	FH1/FH2 domain-containing protein 1	2	0.040489	68.398	0	0	7129300	5020200	0	0	0	0	0	2
IVTHAQLLEQHR	1443.79	E9QAI5	Cad	CAD protein;Glutamine-dependent carbamoyl-phosphate synthase;Aspartate carbamoyltransferase;Dihydroorotase	3	0.00078215	62.14	0	0	10016000	5052400	0	0	0	0	0	2
GILLQLFGGTR	1173.69	Q921D5	Mcm4	DNA replication licensing factor MCM4	2	0.0027338	75.378	0	0	0	5230400	0	0	0	0	0	3
LNDYLQVETIQALEELAVR	2216.17	Q8BGW1	Fto	Alpha-ketoglutarate-dependent dioxygenase FTO	2	8.28e-05	83.769	0	0	0	5365800	0	0	0	0	0	2
LLPVLQEALSAYLDSAK	1830.01	Q8BIW1	Prune	Protein prune homolog	2;3	0.010373	58.487	4529900	0	9451300	5563200	0	0	0	0	0	3
NLQAGDAGLYQCQSLR	1792.85	Q99NH8	Trem2	Triggering receptor expressed on myeloid cells 2	2	0.00066732	85.845	7663800	0	7854100	5632500	0	0	0	0	0	5
CTIEAEPLEIIYDAR	1791.87	Q5H8C4	Vps13a	Vacuolar protein sorting-associated protein 13A	2	0.0080774	54.143	0	6296800	0	5678500	0	0	0	0	0	2
ADANLLTDTGTESSPR	1646.77	Q9CRA8	Exosc5	Exosome complex component RRP46	2	0.0040222	63.727	0	0	0	5696300	0	0	0	0	0	3
LQFLFAK	865.506	D3YUW8	Pogz	Pogo transposable element with ZNF domain	2	0.013146	103.28	5244600	0	0	5719500	0	0	0	0	0	4
DMGEMVTQGQTDAQYMFLR	2219.97	Q62261	Sptbn1	Spectrin beta chain, non-erythrocytic 1	2;3	0.030465	33.782	7011500	4329400	0	5735500	0	0	0	0	0	3
ASVASDPESPPGGNEPAAASGQR	2150.98	Q9D0L8	Rnmt	mRNA cap guanine-N7 methyltransferase	2	0.00044124	49.482	0	0	0	5766300	0	0	0	0	0	2
TGSEEVTSQTTGIDSK	1638.76	Q9D927	1810009N02Rik		2	0.00030398	74.46	7065500	4815800	0	5814200	0	0	0	0	0	3
ACTALYYLSQLSPGK	1670.83	D3Z6I4	Cryzl1	Quinone oxidoreductase-like protein 1	3	0.030033	26.365	6616900	5021200	0	5883400	0	0	0	0	0	3
LQSTENDYINASLVDIEEAQR	2407.15	D3Z6W2	Ptpn2	Tyrosine-protein phosphatase non-receptor type;Tyrosine-protein phosphatase non-receptor type 2	2	0.0052102	56.147	6168500	0	0	5930800	0	0	0	0	0	2
ASAGPVPGAVVIAEGLHPSLPSPTGNSTPLGTSK	3165.67	Q8BHL3	Tbc1d10b	TBC1 domain family member 10B	3	0.068774	8.6177	0	0	0	5942600	0	0	0	0	0	2
VPIGPNPVITDQLPPSR	1798.99	Q61876		MLV-related proviral Env polyprotein;Surface protein;Transmembrane protein	2	0.00051687	62.924	7425800	0	0	6008900	0	0	0	0	0	2
LVSEEEALGFFK	1367.7	Q8CE46	Pus7l	Pseudouridylate synthase 7 homolog-like protein	2	0.0071634	64.297	3401700	5510100	0	6042100	0	0	0	0	0	2
LQLLLLNPLK	1163.76	B9EKJ3	Mon2	Protein MON2 homolog	2	0.00084997	98.299	7292800	5888400	5506300	6156400	0	0	0	0	0	4
DCCVEPGSELPPAPPPSSR	2050.91	Q3UY68	Camk1	Calcium/calmodulin-dependent protein kinase type 1	2	0.0014673	51.218	0	0	8454400	6368100	0	0	0	0	0	2
YQVLDGEVYPPSVEQASVLMR	2379.18	Q543T1	Ptgs1	Prostaglandin G/H synthase 1	2	0.000836	50.843	0	6898400	10754000	6385100	0	0	0	0	0	4
VITDPEQLQTCNVDWLK	2058.01	E9QN44	D2hgdh	D-2-hydroxyglutarate dehydrogenase, mitochondrial	2	1.89e-07	104.87	10907000	8835000	8814600	6386800	0	0	0	0	0	5
ELLGALEPYVYAWTAEQR	2108.06	E9QN44	D2hgdh	D-2-hydroxyglutarate dehydrogenase, mitochondrial	3	0.029155	29.582	6450100	0	0	6417500	0	0	0	0	0	2
IYFLLVR	922.564	P40336	Vps26a;Vps26b	Vacuolar protein sorting-associated protein 26A;Vacuolar protein sorting-associated protein 26B	2	0.0084819	120.76	12119000	9465400	16389000	6476700	0	0	0	0	0	6
TGDCQAGSLQSCPELTPGSR	2119.93	Q9QWF0	Chaf1a	Chromatin assembly factor 1 subunit A	2	0.019549	40.025	2707100	0	0	6481300	0	0	0	0	0	4
ILSVIGECLDNFGPGCVGVQK	2261.12	Q9D0D3	Mtpap	Poly(A) RNA polymerase, mitochondrial	2;3	0.00027264	56.205	0	5828500	5539900	6507800	0	0	0	0	0	6
GFYYLMQELPQER	1672.79	P51174	Acadl	Long-chain specific acyl-CoA dehydrogenase, mitochondrial	2	1.94e-10	146.11	70844000	0	0	6605000	0	0	0	0	0	4
TVDIGVVTAEDALNYGFSGVMLR	2426.22	Q91WD5	Ndufs2	NADH dehydrogenase [ubiquinone] iron-sulfur protein 2, mitochondrial	2;3	9.44e-11	130.98	10353000	19533000	0	6628100	0	0	0	0	0	4
LSSSQGTIESSLQDISSR	1893.93	Q3THP3	Tbk1	Serine/threonine-protein kinase TBK1	2	0.00014284	69.602	0	7598000	0	6629100	0	0	0	0	0	6
TGYTMVQENGQR	1382.62	D3YXZ5	Rbm47	RNA-binding protein 47	2	0.05072	50.353	0	7148100	0	6633900	0	0	0	0	0	3
GNSELSEAENMDTPPDDESK	2163.88	Q45VK5	Ilf3	Interleukin enhancer-binding factor 3	2	0.032041	31.526	0	0	9851700	6673600	0	0	0	0	0	2
MFGSIPMQACQQK	1524.69	Q3TKH5	Zcchc8	Zinc finger CCHC domain-containing protein 8	2	0.0092519	58.433	0	4966200	0	6742000	0	0	0	0	0	2
AEGSEYQVLYIADDNEIR	2083.97	Q91ZX7	Lrp1	Prolow-density lipoprotein receptor-related protein 1;Low-density lipoprotein receptor-related protein 1 85 kDa subunit;Low-density lipoprotein receptor-related protein 1 515 kDa subunit;Low-density lipoprotein receptor-related protein 1 intracellular domain	2	0.0044804	47.189	5477700	3965500	8269100	6795900	0	0	0	0	0	4
EFLNELLK	1004.55	Q80U95	Ube3c	Ubiquitin-protein ligase E3C	2	0.019346	73.616	0	6983200	9141300	6817100	0	0	0	0	0	3
ESVANTVADVESSGSTSSK	1853.85	Q8CJF7	Ahctf1	Protein ELYS	2	0.0015394	50.563	8609400	6689800	0	6933200	0	0	0	0	0	5
EYEDEIDCLQK	1440.61	G3X8V5	Rnf219	RING finger protein 219	2	0.0011901	82.645	0	5084000	0	6986500	0	0	0	0	0	2
QQDSQPEEVMDVLEMVESVK	2319.06	Q3TUQ5	Pnn	Pinin	2	6.72e-10	103.21	7569000	0	0	7184500	0	0	0	0	0	2
LGADEVIDYTLGSVEEQLK	2078.04	D3Z792	Rtn4ip1	Reticulon-4-interacting protein 1, mitochondrial	2	1.42e-09	100.22	9793500	0	0	7194800	0	0	0	0	0	2
QNQDAFDVIITDSSDPMGPAESLFK	2724.26	Q543H0	Srm	Spermidine synthase	2	1.26e-06	67.605	10145000	7795800	0	7283400	0	0	0	0	0	3
IFSGGDQSFSHYSSPQNCGPPDDFR	2801.18	Q6PAV2	Herc4	Probable E3 ubiquitin-protein ligase HERC4	3	0.054861	18.403	0	7566600	0	7309900	0	0	0	0	0	2
LGTSSDSGSTNTMNTNFK	1860.82	Q80WR0	Nup153		2	0.023077	40.577	6366900	7266700	0	7327100	0	0	0	0	0	3
EMNDIEQICSR	1393.6	B7ZMP1	Xpnpep3	Probable Xaa-Pro aminopeptidase 3	2	0.01334	60.398	7418800	10149000	6846200	7348800	0	0	0	0	0	4
SGEDESQEDVLMDEAPSNLSQASTLQANR	3120.38	Q4JG03	Huwe1	E3 ubiquitin-protein ligase HUWE1	3	0.055051	15.519	7176800	8041900	0	7362400	0	0	0	0	0	3
DAPWNNQPDPNWNNQFEGPWNNQHEPPPWGGAQR	3993.74	G5E8I8	Cherp	Calcium homeostasis endoplasmic reticulum protein	3	0.068774	8.6177	0	0	0	7365000	0	0	0	0	0	2
DNLGNSNVPDSPIPAECEAAGR	2282.02	E9PY90	Ctage5	cTAGE family member 5	2	0.013992	46.746	0	0	0	7374300	0	0	0	0	0	2
IITIPAALQQVK	1293.8	Q3UR94	Pole	DNA polymerase;DNA polymerase epsilon catalytic subunit A	2	0.026312	49.418	0	0	6985100	7378200	0	0	0	0	0	2
QLGVAESESSGAPIDLLYELVK	2317.21	G5E8J8	Wiz	Protein Wiz	2	0.00072424	65.805	0	4495300	0	7478800	0	0	0	0	0	2
FICPVVGLEMNGR	1490.74	A1L0V7	Rtfdc1	Protein RTF2 homolog	2	0.00090736	77.379	0	5099600	8830400	7555900	0	0	0	0	0	3
HIDMVEGDEGR	1256.55	E9Q5B5	Hk2	Hexokinase;Hexokinase-2	2;3	7.94e-05	98.048	0	0	25515000	7556700	0	0	0	0	0	14
DGVLSPSSQAQLSSR	1530.76	Q3U1V6	Uevld	Ubiquitin-conjugating enzyme E2 variant 3	2	0.025257	46.592	0	0	8047500	7656800	0	0	0	0	0	2
VPAPEVASGPDPEEEIR	1790.87	Q8BX02	Kank2	KN motif and ankyrin repeat domain-containing protein 2	2	2.57e-07	102.62	9750200	8425100	0	7769600	0	0	0	0	0	3
VNQPLQTILNQLFPGYGSGR	2201.16	Q8VDF2	Uhrf1	E3 ubiquitin-protein ligase UHRF1	3	0.0086065	35.159	0	0	8892300	7786300	0	0	0	0	0	2
VSNSLINFGR	1105.59	Q571D8	Tbc1d5	TBC1 domain family member 5	2	0.0089059	67.993	0	0	0	7875400	0	0	0	0	0	2
LYQSCADPTGCGTGSDAR	1914.78	Q9ET22	Dpp7	Dipeptidyl peptidase 2	2	7.35e-05	74.46	10303000	0	6236300	7878600	0	0	0	0	0	5
SFGLPSIGR	932.508	Q3UGC8	Pcca	Propionyl-CoA carboxylase alpha chain, mitochondrial	2	0.062992	50.04	0	0	9720700	7887400	0	0	0	0	0	2
MLLEEIK	874.483	Q61687	Atrx	Transcriptional regulator ATRX	2	0.035257	71.715	5335200	0	0	7905600	0	0	0	0	0	3
ALYFISPTPK	1135.63	Q60770	Stxbp3;Stxbp3a;Stxbp3b	Syntaxin-binding protein 3	2	0.027447	57.96	0	0	8897100	7909600	0	0	0	0	0	3
LPIIGVVENMSGFICPK	1872.98	Q9R060	Nubp1	Cytosolic Fe-S cluster assembly factor NUBP1	3	7.12e-05	71.692	7400800	12603000	0	7993800	0	0	0	0	0	3
VTLQFPDQLLGDAGAVAAR	1941.03	Q9CR25	Dph2	Diphthamide biosynthesis protein 2	3	0.00039366	39.385	6574500	6116700	4577600	7996500	0	0	0	0	0	4
LFEPFEVHTR	1273.65	Q80ZW2	Them6	Protein THEM6	3	0.0014358	62.005	0	0	12401000	7997500	0	0	0	0	0	2
VTILPNALITPLISSSMIK	2010.18	Q9JIH4	Nfat5	Nuclear factor of activated T-cells 5	2;3	0.00019641	81.431	5030100	7412200	0	8037300	0	0	0	0	0	3
LSGGQGGESDGFSHTEGQPQR	2129.94	D3Z5I9	Rbm33	RNA-binding protein 33	3	0.0056455	37.112	0	6648500	0	8043700	0	0	0	0	0	2
QLQEFSSAIEEYNSALAEK	2156.03	O54692	Zw10	Centromere/kinetochore protein zw10 homolog	2	0.0043182	51.211	7380100	0	6578100	8195100	0	0	0	0	0	4
PGGDFGTVFPEIPVEFLQEK	2205.1	G3X9H5	Htt	Huntingtin	2	0.010513	42.209	0	10569000	0	8200100	0	0	0	0	0	2
DAQQSSSPAADNLR	1458.67	I6L960	Ube4a	Ubiquitin conjugation factor E4 A	2	0.022615	46.73	0	0	10579000	8213700	0	0	0	0	0	2
LASAFSLPIGESLAQR	1658.9	Q14C51	Ptcd3	Pentatricopeptide repeat domain-containing protein 3, mitochondrial	2;3	0.037726	32.859	0	31866000	0	8305800	0	0	0	0	0	2
PLEVAIEASNGASDYGNK	1833.87	Q5SUR0	Pfas	Phosphoribosylformylglycinamidine synthase	2	0.00036951	75.695	0	0	0	8465200	0	0	0	0	0	2
VTENYLCKPEDNVYSIDFTR	2462.14	Q8C4B4	Unc119b	Protein unc-119 homolog B	3	0.0081191	27.924	7864300	0	7813800	8500800	0	0	0	0	0	2
NDPNLCEDSVSDLVLR	1844.86	Q8C3Y4	Kntc1	Kinetochore-associated protein 1	2	1.68e-05	92.925	6933700	0	0	8586400	0	0	0	0	0	2
EIGLWYAK	978.517	B2RQS6	Dhx36	ATP-dependent RNA helicase DHX36	2	0.04975	58.167	46476000	0	9013200	8751700	0	0	0	0	0	3
ALIDWIR	885.507	O89001	Cpd	Carboxypeptidase D	2	0.018222	89.673	5389200	6572300	0	8793500	0	0	0	0	0	3
IQEQVQQTLAR	1312.71	E0CX59	Pkp2		2	0.010664	61.65	0	6981100	7000200	8870300	0	0	0	0	0	3
NILCFPIK	1003.55	Q3TCR8	Pde2a	cGMP-dependent 3,5-cyclic phosphodiesterase	2	0.04975	58.167	0	6677600	0	8894900	0	0	0	0	0	3
SPLKPLPLEEQVEWNPK	2003.07	Q8BP40	Acp6	Lysophosphatidic acid phosphatase type 6	3	0.0073517	45.608	0	0	0	9112600	0	0	0	0	0	3
TVENFVALATGEK	1377.71	Q3UC73	Ppic	Peptidyl-prolyl cis-trans isomerase;Peptidyl-prolyl cis-trans isomerase C	2	0.0013951	74.944	0	0	11489000	9121100	0	0	0	0	0	2
AMGMTNLPAVGR	1216.61	E9QAQ7	Arid1a	AT-rich interactive domain-containing protein 1A	2	0.018188	54.608	0	9785900	0	9121800	0	0	0	0	0	2
VLVIPVCFR	1101.64	Q3UWY4	Lrch1	Leucine-rich repeat and calponin homology domain-containing protein 1	2	0.013728	76.847	0	0	0	9137300	0	0	0	0	0	3
ILDLIDDAWR	1228.65	Q8R034	Anapc13	Anaphase-promoting complex subunit 13	2	1.55e-05	104.17	10331000	0	6967400	9194300	0	0	0	0	0	4
GSFGELALMYNTPR	1554.75	A0A0A6YY28	Prkar2a;Prkar2b	cAMP-dependent protein kinase type II-alpha regulatory subunit;cAMP-dependent protein kinase type II-beta regulatory subunit	2	0.00018061	87.363	0	9124300	0	9219900	0	0	0	0	0	2
IEDDVVVTQDSPLILSADCPK	2313.14	B7ZMP1	Xpnpep3	Probable Xaa-Pro aminopeptidase 3	2	0.00064041	54.09	7505700	7796400	7821600	9270800	0	0	0	0	0	5
GPSDFSGLPVGTYQAFPNIHPPQIPATPPSYESVDDINGDK	4324.06	Q9CX00	Ist1	IST1 homolog	3	0.060484	6.9752	14464000	9326800	0	9289600	0	0	0	0	0	4
TVFQPVHPIQPIQMPAFTTVQR	2534.35	Q8BH15	Cnot10	CCR4-NOT transcription complex subunit 10	3	0.0048236	25.935	0	13227000	0	9306100	0	0	0	0	0	3
DCQIAHGAAQFLR	1485.71	Q8CFI7	Polr2b	DNA-directed RNA polymerase II subunit RPB2	3	0.049102	26.124	9622600	8336000	8821800	9365400	0	0	0	0	0	4
NDFTEEEEAQVRK	1593.73	Q5SUR3	Skp1a;Skp1	S-phase kinase-associated protein 1	2	0.016507	82.417	6737500	0	10842000	9372900	0	0	0	0	0	4
GVMTTSGDTGLSVIR	1492.76	Q9QY81	Nup210	Nuclear pore membrane glycoprotein 210	2	0.0036508	60.49	0	0	9727900	9375500	0	0	0	0	0	2
ASDCYQGLVDELAK	1567.72	F8VQ29	Iqgap3		2	0.001715	69.65	0	0	0	9398900	0	0	0	0	0	4
GQSLGYAFAEFQK	1444.7	Q8CGC6	Rbm28	RNA-binding protein 28	2	0.0068025	63.408	0	0	0	9410200	0	0	0	0	0	2
ELGGPLTNAGLAAAILQSQNR	2093.12	Q61213	gag		3	0.00013741	48.315	0	9088000	0	9478300	0	0	0	0	0	2
LAVATFAGIENK	1232.68	Q8C140	Slc25a13	Calcium-binding mitochondrial carrier protein Aralar2	2	0.0013902	75.652	14852000	15693000	15439000	9482400	0	0	0	0	0	3
DQFPEVYVPTVFENYIADIEVDGK	2786.33	Q62159	Rhoc	Rho-related GTP-binding protein RhoC	3	0.010489	24.644	0	0	0	9624600	0	0	0	0	0	4
GMAPAPTDDLFAR	1360.64	Q7TMS2	Sipa1	Signal-induced proliferation-associated protein 1	2	0.022042	48.44	0	0	0	9674100	0	0	0	0	0	2
YEENPAWPGTSTHNGPNGFSQIMDETPNVSK	3403.51	D3Z5I1	Zc3hav1	Zinc finger CCCH-type antiviral protein 1	3	0.030852	21.771	0	0	0	9694100	0	0	0	0	0	3
ILAVGTQTGALR	1198.7	D3Z2Q2	Stxbp5	Syntaxin-binding protein 5	2	0.0012369	76.282	10680000	9768300	10904000	9718800	0	0	0	0	0	3
LNSVPYPPLLR	1267.73	Q9JIK9	Mrps34	28S ribosomal protein S34, mitochondrial	2	0.044632	47.198	10237000	12058000	0	9752000	0	0	0	0	0	3
APQLVGQFIAR	1198.68	Q61823	Pdcd4	Programmed cell death protein 4	2	0.00021557	103.74	20098000	14669000	17173000	9858200	0	0	0	0	0	6
ALNILQSTNMAFGK	1506.79	Q8CFZ9	Rfc5	Replication factor C subunit 5	2	0.00077671	76.143	0	9910300	11208000	9893000	0	0	0	0	0	3
ELGGPLSNAGLAAAILQSQNR	2079.11	Q7TQ39	gag		2;3	3.87e-10	102.28	13357000	21352000	18330000	9941800	0	0	0	0	0	3
ASGSGSCNAPGSPEGSSQLCSPR	2248.94	S4R270	Bin2	Bridging integrator 2	2;3	0.0004703	31.827	7226100	0	7829200	10049000	0	0	0	0	0	5
QTELFAHFIQPAAQK	1727.9	Q91ZW3	Smarca5	SWI/SNF-related matrix-associated actin-dependent regulator of chromatin subfamily A member 5	2	3.37e-10	136.5	0	0	9418200	10084000	0	0	0	0	0	5
VVLCFGEEFPDTVPLR	1876.94	Q3TZQ3	Irf8	Interferon regulatory factor 8	2	0.00015724	77.305	9936400	9322600	10826000	10094000	0	0	0	0	0	4
NSLLAGGDDDTMSVISGMSSR	2111.95	A2AFF6	Stag2	Cohesin subunit SA-2	2	0.0027682	46.319	8364700	0	10039000	10108000	0	0	0	0	0	3
LQETPDPWQSLDPFDSLESK	2331.09	F7CXE4	Gm7535;Ncaph2	Condensin-2 complex subunit H2	2	8.68e-05	65.472	0	0	0	10126000	0	0	0	0	0	3
QSTQVMAASMSAFDPLK	1810.86	Q9D828	Tfg		2	7.49e-06	83.204	0	10840000	7785600	10329000	0	0	0	0	0	3
GAPAISSTPAEAELAGEGISINTGPK	2437.23	Q3UZN6	Pdcl	Phosducin-like protein	2	0.0060249	35.757	0	0	0	10456000	0	0	0	0	0	2
TVQIPVYDFVSHSR	1646.84	Q8C476	Uck2	Uridine kinase;Uridine-cytidine kinase;Uridine-cytidine kinase 2	3	0.0034071	56.482	0	0	0	10514000	0	0	0	0	0	2
CNCYTGADLTALVR	1612.73	Q9DBY8	Nvl	Nuclear valosin-containing protein-like	2	0.0072948	58.172	0	0	10144000	10572000	0	0	0	0	0	2
YSPTSPTYSPTSPVYTPTSPK	2257.08	O08847	Polr2a	DNA-directed RNA polymerase;DNA-directed RNA polymerase II subunit RPB1	2	0.016328	49.929	8977100	0	7728200	10574000	0	0	0	0	0	5
DAPQPYELNTAINCR	1760.82	Q8K3A9	Mepce	7SK snRNA methylphosphate capping enzyme	2	0.0081811	67.153	0	10657000	8678400	10629000	0	0	0	0	0	5
CTVCNEATPIK	1291.59	Q9CZX7	Tmem55a	Type 2 phosphatidylinositol 4,5-bisphosphate 4-phosphatase	2	0.0011832	82.749	0	10841000	0	10771000	0	0	0	0	0	2
VEELEMTEDIR	1362.63	Q53WR6	Glg1	Golgi apparatus protein 1	2	0.00021627	103.7	9719900	12242000	9515200	10811000	0	0	0	0	0	6
SNPVHEIQSLDEVTNLDR	2065.01	Q3URM4	Erp44	Endoplasmic reticulum resident protein 44	2;3	4.77e-05	76.262	0	0	0	10816000	0	0	0	0	0	5
WNQLQAFWGTGK	1434.7	Q8BTS4	Nup54	Nuclear pore complex protein Nup54	2	0.0015626	74.944	0	0	0	10850000	0	0	0	0	0	2
LQQQQQQQQLAQMK	1726.88	G3UYG6	Gigyf2	PERQ amino acid-rich with GYF domain-containing protein 2	2	1.36e-05	105.4	7303000	9967600	8810500	10858000	0	0	0	0	0	3
LETVALPLQGLEDLAADR	1923.03	B1ARU4	Macf1	Microtubule-actin cross-linking factor 1	2	0.00011944	71.241	0	0	0	10947000	0	0	0	0	0	2
SETAPVAQAASTATEKPAAAK	1999.02	P43275	Hist1h1a	Histone H1.1	2	0.0028836	59.871	0	0	0	11007000	0	0	0	0	0	2
LELLIDK	842.511	P70280	Vamp7	Vesicle-associated membrane protein 7	2	0.026827	77.058	17823000	16300000	13853000	11019000	0	0	0	0	0	4
DYVLNCNILPPLLQLFSK	2146.15	Q60960	Kpna1	Importin subunit alpha-5;Importin subunit alpha-5, N-terminally processed	2	0.019322	62.528	0	0	0	11054000	0	0	0	0	0	2
VDVSEPSPTVSLNGTCFK	1935.92	Q5NC05	Ttf2	Transcription termination factor 2	2	0.0022188	52.555	0	0	20202000	11219000	0	0	0	0	0	3
DGLALGPGPFVTALEYATDTK	2135.08	Q3UGR5	Hdhd2	Haloacid dehalogenase-like hydrolase domain-containing protein 2	2	0.00046459	69.594	9758800	11201000	8077000	11264000	0	0	0	0	0	4
GIVESSVTSALAGNSDR	1661.82	E9Q6J5	Bod1l		2	0.061286	32.498	10035000	0	0	11289000	0	0	0	0	0	2
LLASEIYDILQSSNLADGDSFNEMNSR	3001.4	Q9D7A8	Armc1	Armadillo repeat-containing protein 1	3	1.08e-05	57.21	0	0	17441000	11338000	0	0	0	0	0	2
EYFGAFGEIENIELPMDTK	2202.02	F6VQH5	Hnrnpdl	Heterogeneous nuclear ribonucleoprotein D-like	2	0.00071821	79.875	0	13411000	0	11375000	0	0	0	0	0	2
GIIPETATLFK	1188.68	D3YZ98	Pik3c3	Phosphatidylinositol 3-kinase;Phosphatidylinositol 3-kinase catalytic subunit type 3	2	0.010664	61.65	11892000	10717000	11993000	11477000	0	0	0	0	0	4
SGELQGGPDDNLIEGGGTK	1842.86	Q8C391	Exoc4	Exocyst complex component 4	2	7.01e-05	70.332	11757000	0	10471000	11502000	0	0	0	0	0	3
MISEIDKEGTGK	1306.64	Z4YJH1	Cetn2	Centrin-2	3	0.002383	59.116	8582200	0	0	11557000	0	0	0	0	0	2
GDMITLPAGIYHR	1442.73	Q99JT9	Adi1	1,2-dihydroxy-3-keto-5-methylthiopentene dioxygenase	3	0.044949	25.718	0	0	0	11596000	0	0	0	0	0	2
AALEEVEGDVAELELK	1713.87	D4AFX6	Acap2	Arf-GAP with coiled-coil, ANK repeat and PH domain-containing protein 2	2	0.00085247	82.069	12365000	10302000	0	11602000	0	0	0	0	0	5
LEVDEDFEEDNAAK	1622.69	Q6A0A1	mKIAA0224;Dhx38		2	0.00013932	89.548	0	11998000	9451400	11610000	0	0	0	0	0	4
RGPQLVCTGSDDGTVK	1688.82	Q6PE01	Snrnp40	U5 small nuclear ribonucleoprotein 40 kDa protein	2	0.00018254	87.001	0	0	6120100	11648000	0	0	0	0	0	2
GDLDFAEQLWCR	1508.67	H3BKZ0	Zwilch	Protein zwilch homolog	2	0.002278	79.974	5717000	0	8229900	11656000	0	0	0	0	0	3
DGNPDNETYLHR	1429.62	Q61655	Ddx19a;Ddx19b	ATP-dependent RNA helicase DDX19A	2;3	0.0020017	62.924	0	0	0	11661000	0	0	0	0	0	6
DFTFNQDSFADFPDMVR	2050.87	P70699	Gaa	Lysosomal alpha-glucosidase	2	1.54e-07	106.01	14303000	0	0	11684000	0	0	0	0	0	2
GVAGAPPTVTLLR	1250.73	Q91ZX7	Lrp1	Prolow-density lipoprotein receptor-related protein 1;Low-density lipoprotein receptor-related protein 1 85 kDa subunit;Low-density lipoprotein receptor-related protein 1 515 kDa subunit;Low-density lipoprotein receptor-related protein 1 intracellular domain	2	0.024463	47.228	0	6641100	0	11686000	0	0	0	0	0	2
VGQNPDTASQGHPEVQAPSQTGSPEAENGCGSPR	3445.52	Q3UZA1	Rcsd1	CapZ-interacting protein	3;4	0.069369	8.887	6216700	0	0	11764000	0	0	0	0	0	2
GGYDGYRPSFSNTPNSGYSQSQFTAPR	2940.31	Q60865	Caprin1	Caprin-1	3	0.00056501	45.269	0	0	0	11796000	0	0	0	0	0	2
DVSGAMPDSYSPQYVEAAWYPWWER	2989.3	Q7TPT7	Vars	Valine--tRNA ligase	2;3	0.00019201	63.631	0	0	20785000	11877000	0	0	0	0	0	2
GLQDWLR	886.466	Q7TQ39	gag		2	0.02863	75.915	17968000	18574000	17580000	12047000	0	0	0	0	0	8
GPPVFTQEER	1158.57	Q3TLU0	Pcyt2	Ethanolamine-phosphate cytidylyltransferase	2	0.0057946	75.043	13243000	0	0	12051000	0	0	0	0	0	2
VLFANPPSSTYEEALR	1792.9	Q9DCV4	Rmdn1	Regulator of microtubule dynamics protein 1	2	0.028206	50.95	12135000	0	11706000	12128000	0	0	0	0	0	2
TLFPLTEVIK	1159.69	P27641	Xrcc5	X-ray repair cross-complementing protein 5	2	0.052867	48.423	0	0	0	12132000	0	0	0	0	0	2
EAIESAIGGNAYQHSK	1673.8	Q5EBK8	Dynlt1	Dynein light chain Tctex-type 1	2	3.8e-11	140.57	0	12134000	12144000	12212000	0	0	0	0	0	6
LVSEYGYQSWPSFSTLEK	2120.01	Q8K2I4	Manba	Beta-mannosidase	2	0.022293	53.967	10951000	0	0	12251000	0	0	0	0	0	2
EQPPPAYEPPAPAPAPLPPPSAPSVQSSR	2931.48	Q3UXS0	Scamp3		3	0.029353	22.399	20320000	13323000	0	12268000	0	0	0	0	0	5
TSEVLVPSNGTANNVVQEPVNPPADISGNK	3046.52	S4R2J9	Prrc2c	Protein PRRC2C	3	0.031121	22.399	0	0	0	12289000	0	0	0	0	0	3
LLSDLCGTVMSTNDVEK	1880.89	Q61823	Pdcd4	Programmed cell death protein 4	2	4.75e-07	95.401	23508000	22190000	13832000	12367000	0	0	0	0	0	6
QDSSQAIPLVVESCIR	1800.9	A0A087WNM1	Srgap2	SLIT-ROBO Rho GTPase-activating protein 2	2	3.43e-12	142.1	15278000	12603000	12969000	12390000	0	0	0	0	0	4
QLLQNPPAGVDPIIWEQAK	2116.13	Q8BTS4	Nup54	Nuclear pore complex protein Nup54	2	0.0094444	43.991	9719800	0	0	12436000	0	0	0	0	0	2
GITQNALDYMK	1252.61	A2AN08	Ubr4	E3 ubiquitin-protein ligase UBR4	2	0.015159	64.711	0	10413000	11525000	12462000	0	0	0	0	0	2
HLCEPGADGAETFADGVPR	1997.89	Q5DTP7	Chd4;Chd5	Chromodomain-helicase-DNA-binding protein 4;Chromodomain-helicase-DNA-binding protein 5	2	0.00065734	72.265	0	0	0	12530000	0	0	0	0	0	2
IQNAGGSVMIQR	1272.66	Q546R1	Ppm1a;Ppm1b	Protein phosphatase 1A;Protein phosphatase 1B	2	0.0036939	66.19	0	0	13467000	12586000	0	0	0	0	0	2
NFINLPIYQQLLGLR	1801.03	B1ARU4	Macf1	Microtubule-actin cross-linking factor 1	2	1.06e-06	111.06	9802700	8225900	0	12619000	0	0	0	0	0	3
EWLLGMLGAESSK	1419.71	Q01320	Top2a	DNA topoisomerase 2-alpha	2	0.00071454	78.342	0	0	10812000	12683000	0	0	0	0	0	2
YPLVFSQQTVGSYLK	1728.91	E9QK83	Utp20	Small subunit processome component 20 homolog	2	0.004232	76.533	0	12188000	13884000	12754000	0	0	0	0	0	2
LSQLAYHPLK	1168.66	Q8R1F1	Fam129b	Niban-like protein 1	2	0.0026428	83.168	0	0	14832000	12812000	0	0	0	0	0	5
LMMSELETR	1108.53	Q3U489	Ak4	Adenylate kinase 4, mitochondrial	2	0.015733	66.692	0	0	18144000	12957000	0	0	0	0	0	2
ALQDAFSGLFWQPR	1634.82	P51949	Mnat1	CDK-activating kinase assembly factor MAT1	2	2.26e-05	101.39	0	11320000	0	12965000	0	0	0	0	0	2
LSSGEHIAAFCLTEPASGSDAASIQTR	2775.31	Q8JZN5	Acad9	Acyl-CoA dehydrogenase family member 9, mitochondrial	3	0.053615	16.977	6554800	0	0	13097000	0	0	0	0	0	3
DCISWVGDEGEFK	1540.65	Q6HAA1	Gabpa	GA-binding protein alpha chain	2	0.003134	66.262	18476000	14569000	0	13149000	0	0	0	0	0	3
AMDATLSPTK	1033.51	B1ARU4	Macf1	Microtubule-actin cross-linking factor 1	2	0.041344	52.579	14632000	0	12948000	13204000	0	0	0	0	0	3
ALEKPVLAEPQEPAASVDTAGPEPSCSPAAGAAVLSQR	3770.88	Q3TKH5	Zcchc8	Zinc finger CCHC domain-containing protein 8	3;4	0.038721	16.903	0	0	9087500	13214000	0	0	0	0	0	3
ILENPQSLSDPNNYHEFCR	2332.05	E9PUW7	Xpo7	Exportin-7	3	0.00019827	45.257	17895000	13238000	0	13232000	0	0	0	0	0	5
GGEFAWCDGPLLAALK	1703.83	J3QMC5	Mdn1		2	0.0058777	52.495	0	0	13908000	13249000	0	0	0	0	0	2
IIESYEGNSYTFIDPTQLPYNEK	2720.29	Q3U4N8	Csf1r	Receptor protein-tyrosine kinase	2	0.061888	39.005	9170900	0	14280000	13346000	0	0	0	0	0	3
TVCDPEEFLK	1236.57	F6WMJ3	Arhgef6	Rho guanine nucleotide exchange factor 6	2	0.024434	58.676	18583000	17640000	13531000	13454000	0	0	0	0	0	4
ETAAPVVPELSSDIDSSNFDDIEDDKGDVETFPIPK	3890.81	F8VPK5	Rock2	Rho-associated protein kinase;Rho-associated protein kinase 2	3	0.072464	13.149	11424000	0	0	13529000	0	0	0	0	0	2
DDVIVTASNFSSER	1538.72	O08582	Gtpbp1	GTP-binding protein 1	2	0.0018075	69.01	6916800	7120200	0	13619000	0	0	0	0	0	2
LGGYLSEDQATPENPTVR	1945.94	G3X922	Dnajc13		2	0.00022625	63.76	15387000	15247000	0	13661000	0	0	0	0	0	4
LTGLTSSIPDMILGHLFSQEELSGNSELIQK	3356.72	Q9QYG0	Ndrg2	Protein NDRG2	3	0.02374	24.192	0	0	15260000	13709000	0	0	0	0	0	2
FSELPTQMFPAGATPAEITR	2163.07	Q9D2V5	Aar2	Protein AAR2 homolog	2	0.053585	43.03	0	16333000	0	13895000	0	0	0	0	0	2
DSTPVEESNGELEEK	1661.73	Q8CE96	Trmt6	tRNA (adenine(58)-N(1))-methyltransferase non-catalytic subunit TRM6	2	0.0045514	59.198	0	14767000	0	13908000	0	0	0	0	0	2
AAFTMFSR	929.443	Q9D2D1	Ctsa	Carboxypeptidase;Lysosomal protective protein;Lysosomal protective protein 32 kDa chain;Lysosomal protective protein 20 kDa chain	2	0.017668	75.213	0	0	0	13921000	0	0	0	0	0	2
DGIDDESYGQIFKPIISK	2024.01	P70288	Hdac2	Histone deacetylase 2	2;3	5.33e-05	105.03	0	0	70009000	13980000	0	0	0	0	0	3
CFSYLPISPTFAGYTWK	2036.97	Q9EPR4	Slc23a2	Solute carrier family 23 member 2	2	4.86e-07	95.018	0	0	10734000	14026000	0	0	0	0	0	4
GSPLGEVVEQGLTR	1440.76	G3X9M0	Dap3	28S ribosomal protein S29, mitochondrial	2	6.5e-06	108.56	15496000	0	0	14101000	0	0	0	0	0	5
MIVTPQSNRPVMGIVQDTLTAVR	2525.35	O08847	Polr2a	DNA-directed RNA polymerase;DNA-directed RNA polymerase II subunit RPB1	3	1.6e-07	71.535	0	12081000	18579000	14111000	0	0	0	0	0	3
SDFFTSFYDK	1255.54	E9QAN2	Papola	Poly(A) polymerase alpha	2	0.0045878	76.465	10193000	9000800	10935000	14127000	0	0	0	0	0	5
ALPPLWENLDLVPAGDR	1874.99	Q9QZA0	Ca5b	Carbonic anhydrase 5B, mitochondrial	3	0.0001199	47.548	10902000	9070900	8307200	14132000	0	0	0	0	0	4
VFVDVVNGEYVPR	1491.77	Q3TNS3	Uri1	Unconventional prefoldin RPB5 interactor	2	0.0003295	85.958	0	0	0	14142000	0	0	0	0	0	2
NLNPVFGGSGPALTGLR	1668.89	A2AI52	Usp8	Ubiquitin carboxyl-terminal hydrolase;Ubiquitin carboxyl-terminal hydrolase 8	2	0.011918	70.622	0	0	0	14296000	0	0	0	0	0	3
QFLILNDFPSVNEAIDQR	2118.07	A2ALA4	Med22	Mediator of RNA polymerase II transcription subunit 22	2	2.23e-06	110.38	12951000	0	14470000	14319000	0	0	0	0	0	5
EVMEANLPSILLK	1455.8	E9QK83	Utp20	Small subunit processome component 20 homolog	2	0.01036	72.2	10206000	0	15572000	14364000	0	0	0	0	0	3
LSTDDLNSLIAHAHR	1661.85	Q8CAQ8	Immt	MICOS complex subunit Mic60	3;4	0.00013204	59.607	0	0	0	14396000	0	0	0	0	0	5
DTGLLADAALLSDTVRPTNAALPTDAAYPAVNVR	3451.79	Q3U1Z9	Tnfsf9	Tumor necrosis factor ligand superfamily member 9	3	0.00078813	33.816	12790000	0	0	14435000	0	0	0	0	0	2
CTVYFEGPR	1127.51	Q91ZX7	Lrp1	Prolow-density lipoprotein receptor-related protein 1;Low-density lipoprotein receptor-related protein 1 85 kDa subunit;Low-density lipoprotein receptor-related protein 1 515 kDa subunit;Low-density lipoprotein receptor-related protein 1 intracellular domain	2	0.010066	74.301	0	10748000	17589000	14447000	0	0	0	0	0	2
ETTQVVQEAEPESGAQPRPGYFK	2547.22	S4R2J9	Prrc2c	Protein PRRC2C	3	0.00023692	39.935	0	0	0	14599000	0	0	0	0	0	3
QDHPSSMGVYGQESGGFSGPGENR	2479.05	Q5SUT0	Ewsr1	RNA-binding protein EWS	3	1.08e-05	42.454	0	6937900	0	14604000	0	0	0	0	0	5
LASDTTDDDDALAEILQANDLLTQGVR	2872.39	Q3UE19	Gga2	ADP-ribosylation factor-binding protein GGA2	3	0.0013836	38.146	0	0	0	14658000	0	0	0	0	0	2
IINEVSKPLAHHIPVEK	1923.09	Q80ZP8	Manf	Mesencephalic astrocyte-derived neurotrophic factor	3	0.015158	42.068	0	0	0	14802000	0	0	0	0	0	4
EVTDLQEEGK	1146.54	Q3UGT9	Parvb	Beta-parvin	2	4.72e-05	131.06	0	10132000	12641000	14827000	0	0	0	0	0	3
EDKVPMAGVGGTEGPEQLPAPCPSQTGSPPVGLIK	3499.73	Q3TGG2	Atxn2l	Ataxin-2-like protein	3	0.036365	21.638	0	0	0	14930000	0	0	0	0	0	4
YQPLDQVVVDDTFPDCTLLLR	2506.24	Q80ZV0	Rnaseh2b	Ribonuclease H2 subunit B	2	4.36e-05	90.367	13160000	14939000	17689000	14979000	0	0	0	0	0	4
SDVPVMQSNPK	1200.58	Q640M1	Utp14a	U3 small nucleolar RNA-associated protein 14 homolog A	2	0.010664	61.65	15347000	13874000	0	14993000	0	0	0	0	0	3
FQPALVTTVDALR	1429.79	E9PV45	Usp24	Ubiquitin carboxyl-terminal hydrolase;Ubiquitin carboxyl-terminal hydrolase 24	2	0.00052811	79.659	10151000	9606900	13184000	14996000	0	0	0	0	0	4
SSGASVTTQPTEFK	1438.69	Q3U8V1	Poldip3	Polymerase delta-interacting protein 3	2	0.067566	39.625	0	0	0	15253000	0	0	0	0	0	2
PSDQVYCYNPVTDSWSTVRPLR	2639.24	Q8BNW9	Kbtbd11	Kelch repeat and BTB domain-containing protein 11	3	0.014089	42.309	15784000	0	0	15280000	0	0	0	0	0	3
PSENLGQVLFGER	1444.73	Q8C7F9	Tm9sf2	Transmembrane 9 superfamily member 2	2	3.15e-08	158.05	19319000	0	15860000	15464000	0	0	0	0	0	3
LTAVCMECFR	1285.56	P04184	Tk1;Tk1b	Thymidine kinase, cytosolic;Thymidine kinase	2	0.0056523	74.376	0	0	24587000	15478000	0	0	0	0	0	2
VAGGYPFDAYK	1186.57	Q8C7R4	Uba6	Ubiquitin-like modifier-activating enzyme 6	2	0.02586	54.539	0	0	12136000	15542000	0	0	0	0	0	2
NMETFCEESR	1301.5	Q7TSZ3	Lars	Leucine--tRNA ligase, cytoplasmic	2	0.00576	74.165	19569000	15534000	0	15566000	0	0	0	0	0	2
NMDAIIVDSEK	1233.59	Q9CU62	Smc1a	Structural maintenance of chromosomes protein 1A	2	0.0085634	62.633	0	0	0	15688000	0	0	0	0	0	2
QIELDLLR	998.576	Q3U0J8	Tbc1d2b	TBC1 domain family member 2B	2	0.0091494	89.752	0	24084000	0	15713000	0	0	0	0	0	2
VLPNDPVFLEPHEELTLCK	2249.14	E9PWD3	Ccnh	Cyclin-H	3	0.0070422	30.863	0	0	0	15756000	0	0	0	0	0	3
EVPLPVNPILMAHGNISPSAYVLETFK	2935.55	Q8BHB4	Wdr3	WD repeat-containing protein 3	3	0.0012844	38.843	0	0	23057000	15766000	0	0	0	0	0	2
ALDQSDNDMSAVYR	1583.69	D3YYT1	Glyr1	Putative oxidoreductase GLYR1	2	7.66e-05	92.866	0	20502000	0	15859000	0	0	0	0	0	2
AALIYTCTVCR	1326.64	B2RVQ7	Zfp706;Znf706	Zinc finger protein 706	2	0.00051349	92.838	0	13750000	14020000	15974000	0	0	0	0	0	6
GEAAEDLCEMALDPDLLLLR	2243.08	Q8VDP4	Ccar2	Cell cycle and apoptosis regulator protein 2	2	1.03e-12	115.8	7685700	0	0	16058000	0	0	0	0	0	2
LLPVGALYK	972.601	Q9R1Z7	Pts	6-pyruvoyl tetrahydrobiopterin synthase	2	0.051911	53.351	0	18469000	18675000	16063000	0	0	0	0	0	5
MVLSESLK	905.489	P56183	Rrp1	Ribosomal RNA processing protein 1 homolog A	2	0.022422	70.69	0	0	14732000	16163000	0	0	0	0	0	2
LVQAAQMLQSDPYSVPAR	1973	Q64727	Vcl	Vinculin	2	2.56e-24	159.5	15166000	16392000	0	16211000	0	0	0	0	0	2
LLEVLSGER	1014.57	Q62261	Sptbn1	Spectrin beta chain, non-erythrocytic 1	2	0.0030521	92.439	20213000	18639000	22168000	16235000	0	0	0	0	0	7
ASQRPDVLTTGGGNPIGDK	1881.95	Q542K4	Cat	Catalase	2	0.00055991	89.541	7814000	0	12318000	16277000	0	0	0	0	0	5
VVNVPGLYCSGWVK	1576.81	Q6IQY0	Fdxr	NADPH:adrenodoxin oxidoreductase, mitochondrial	2	0.0025859	63.624	15045000	18831000	15209000	16338000	0	0	0	0	0	4
DTDEADLVLAK	1188.59	Q61686	Cbx5	Chromobox protein homolog 5	2	0.00056571	92.051	12665000	12113000	17750000	16402000	0	0	0	0	0	6
LLFCTGK	837.442	Q60597	Ogdh	2-oxoglutarate dehydrogenase, mitochondrial	2	0.03938	66.993	0	0	0	16467000	0	0	0	0	0	2
LFGQETPEQR	1203.59	Q80X54	Snx4	Sorting nexin-4	2	0.00058227	104.06	21682000	0	16272000	16487000	0	0	0	0	0	3
KVPEIGNNGTQVSK	1469.78	E9PVX6	Mki67		2;3	9.39e-05	64.374	0	0	29961000	16515000	0	0	0	0	0	3
AMNLTLEPEIFPAATDSR	1974.97	Q99JW2	Acy1	Aminoacylase-1	2	5.05e-10	124.86	23563000	17900000	0	16684000	0	0	0	0	0	5
YFLEDALQLR	1266.66	U5LLB3	Tlr7	Toll-like receptor 7	2	0.0079064	69.954	17401000	0	18714000	16691000	0	0	0	0	0	4
VPVATPNPGDPWNGR	1575.78	P22682	Cbl	E3 ubiquitin-protein ligase CBL	2	1.06e-05	104.79	13440000	7860000	11078000	16714000	0	0	0	0	0	3
EPAEDILQTLLDSTYK	1834.92	Q8K0C4	Cyp51a1	Lanosterol 14-alpha demethylase	3	0.00017575	54.501	0	7821800	15569000	16731000	0	0	0	0	0	3
SPLGGPDPAELLLMGSYLGKPGPPEPALR	2928.54	Q3U425	Pom121	Nuclear envelope pore membrane protein POM 121	3	1.74e-08	67.911	20351000	20049000	24825000	16733000	0	0	0	0	0	5
SSLDDLSIVGQVK	1359.72	Q9D375	Abhd6	Monoacylglycerol lipase ABHD6	2	0.0034803	77.288	16237000	0	12347000	16804000	0	0	0	0	0	4
NFSTVDIQK	1050.53	Q80V79	Msh2	DNA mismatch repair protein Msh2	2	0.010153	74.184	0	17868000	18971000	16837000	0	0	0	0	0	3
NINNDTTYCIK	1354.62	Q99KR3	Lactb2	Beta-lactamase-like protein 2	2	0.00028125	82.749	0	16863000	0	16962000	0	0	0	0	0	7
QTRPVQSWLCDPDAMEQGDTPLTMLQSQVPNIVK	3881.88	Q6ZQ38	Cand1	Cullin-associated NEDD8-dissociated protein 1	3	0.00048513	39.149	0	0	17344000	17098000	0	0	0	0	0	2
DSGPLSDPITGKPYMPLSEAEEVR	2587.25	Q99PU8	Dhx30;mKIAA0890	Putative ATP-dependent RNA helicase DHX30	3	0.044429	25.819	14271000	0	0	17112000	0	0	0	0	0	2
SSLNFPFPPLPTMTQLPGHSSDTSGLPFSQPSCK	3658.74	Q9QWV9	Ccnt1	Cyclin-T1	3	0.069369	8.4749	0	0	10862000	17258000	0	0	0	0	0	2
EAQVSTLQSLFGER	1563.79	Q9WUV0	Orc5	Origin recognition complex subunit 5	2	0.0060523	59.57	20265000	0	25229000	17288000	0	0	0	0	0	3
LLISGMDQPLPLR	1451.82	Q3TBT3	Tmem173	Stimulator of interferon genes protein	2	1.92e-07	125.56	16985000	25153000	15012000	17399000	0	0	0	0	0	4
ANFWYQPSFHGVDLSALR	2107.03	D3YUP1	Carm1	Histone-arginine methyltransferase CARM1	3	0.018816	31.818	0	8286400	23486000	17429000	0	0	0	0	0	3
DAHSQGEVVSCLEK	1557.71	Q53WR6	Glg1	Golgi apparatus protein 1	2	8.27e-07	118.61	13743000	0	19009000	17548000	0	0	0	0	0	3
DLSLLQIQMR	1215.66	A0A0A6YW80	Naa15;Naa16	N-alpha-acetyltransferase 15, NatA auxiliary subunit;N-alpha-acetyltransferase 16, NatA auxiliary subunit	2	3.39e-14	144.38	0	0	0	17659000	0	0	0	0	0	2
VLLSNPHMWWLQDADPENNSR	2521.18	Q3UYM1	Nub1	NEDD8 ultimate buster 1	3	0.0026135	43.216	0	0	22211000	17698000	0	0	0	0	0	2
YFADDTQTALTK	1372.65	Q8CCJ3	Ufl1	E3 UFM1-protein ligase 1	2	0.0032365	68.069	19624000	0	19966000	17814000	0	0	0	0	0	4
DLENLGLTHLIGSPFLR	1894.03	Q3UFZ4	Nol10	Nucleolar protein 10	3	0.0001353	52.862	17923000	0	0	17826000	0	0	0	0	0	4
VELMPGMR	931.462	Q9JJ28	Flii	Protein flightless-1 homolog	2	0.012618	81.297	16668000	0	17350000	17832000	0	0	0	0	0	3
LLDISELNTVGAGR	1456.79	Q3UK41	Nelfa	Negative elongation factor A	2	1.5e-06	112.15	16910000	0	0	17937000	0	0	0	0	0	5
LDILGAAETGSGK	1230.65	F8WJA0	Ddx24	ATP-dependent RNA helicase DDX24	2	0.0028766	67.548	0	13472000	0	17969000	0	0	0	0	0	3
LATGSDDNCAAFFEGPPFK	2042.9	Q3TE06	Wdr1	WD repeat-containing protein 1	2	9.79e-13	121.28	0	125980000	0	18040000	0	0	0	0	0	11
YCNEAAPETPLDFAK	1724.77	Q8VI84	Noc3l	Nucleolar complex protein 3 homolog	2	0.0070766	56.205	14030000	0	0	18140000	0	0	0	0	0	5
GGVAAEALKDPEVCTDPTQLTTHAMGVNIYK	3285.6	Q9CPW3	Mrpl54	39S ribosomal protein L54, mitochondrial	4	0.01284	28.742	0	0	10152000	18156000	0	0	0	0	0	2
DNINIDEATR	1159.55	Q3TW01	Rab32	Ras-related protein Rab-32	2	0.0047382	76.17	28465000	30665000	22665000	18299000	0	0	0	0	0	6
GAPPLPPIPR	1013.6	Q8K1I7	Wipf1	WAS/WASL-interacting protein family member 1	2	0.01186	63.21	22122000	0	23275000	18311000	0	0	0	0	0	5
EVENEQTPVSEPEEEKGSQPGPPVER	2876.33	Q80UE5	Epb4.1l2;Epb41l2	Band 4.1-like protein 2	3	0.022969	17.907	10804000	0	0	18360000	0	0	0	0	0	3
SPFITPIGR	986.555	Q6PGC1	Dhx29	ATP-dependent RNA helicase Dhx29	2	0.01088	73.208	0	0	18585000	18669000	0	0	0	0	0	3
LFNQINVA	917.497	O35864	Cops5	COP9 signalosome complex subunit 5	2	0.021718	71.359	19119000	0	17838000	18699000	0	0	0	0	0	3
SVQLLFAK	904.538	A1ILG8	Vps13c	Vacuolar protein sorting-associated protein 13C	2	0.047313	58.819	29817000	25387000	37482000	18743000	0	0	0	0	0	6
VVEEEWQQIDR	1429.68	Q61033	Tmpo	Lamina-associated polypeptide 2, isoforms alpha/zeta	2	3.51e-14	175.73	20105000	17966000	18604000	18774000	0	0	0	0	0	7
VAELSSDDFHLDR	1502.7	Q53WR6	Glg1	Golgi apparatus protein 1	2	2.26e-05	103.34	13356000	11236000	0	18795000	0	0	0	0	0	3
GPPNPNVEYIPFDEMK	1845.86	Q0VGB7	Ppp4r2	Serine/threonine-protein phosphatase 4 regulatory subunit 2	2	0.003324	68.536	0	18588000	0	18821000	0	0	0	0	0	3
TCEQSMVEQLDK	1466.64	Q9CWI3	Bccip	BRCA2 and CDKN1A-interacting protein	2	0.020004	66.056	13233000	0	0	19154000	0	0	0	0	0	2
SLIPPVTFEVK	1228.71	Q9ES52	Inpp5d	Phosphatidylinositol 3,4,5-trisphosphate 5-phosphatase 1	2	0.026606	54.191	20401000	0	0	19201000	0	0	0	0	0	3
FTPTLTSEYVELTDGLYTK	2177.08	Q3TZX8	Nol9	Polynucleotide 5-hydroxyl-kinase NOL9	2	0.00013864	63.29	18338000	16687000	18257000	19276000	0	0	0	0	0	6
QGLFPNNYVTK	1279.66	E9Q634	Myo1e	Unconventional myosin-Ie	2	0.0068672	63.426	24217000	0	28927000	19292000	0	0	0	0	0	2
DGTLFAWSNGEK	1323.61	Q8BJW6	Eif2a	Eukaryotic translation initiation factor 2A;Eukaryotic translation initiation factor 2A, N-terminally processed	2	3.53e-06	113.93	22019000	0	19100000	19550000	0	0	0	0	0	4
DLSSAEAILALFPENFHQNLK	2356.21	Q8K2Q0	Commd9	COMM domain-containing protein 9	3	0.0001094	60.032	0	20430000	21784000	19562000	0	0	0	0	0	3
TLEDLPGFQELCQAPSLVMDSVIVEK	2917.45	E9PVX6	Mki67		3	0.00021125	46.839	0	14282000	0	19671000	0	0	0	0	0	2
LEAEPDLPLVQPVFITVDPERDDVAAMAR	3205.63	Q9D6E8	Sco2	Protein SCO2 homolog, mitochondrial	3	0.0014838	38.006	0	0	16355000	19684000	0	0	0	0	0	4
GVDLYLR	834.46	Q9CRT8	Xpot	Exportin-T	2	0.034247	72.355	0	0	31305000	19731000	0	0	0	0	0	2
SDILDLR	830.45	Q8K4Q8	Colec12	Collectin-12	2	0.082801	55.676	20669000	0	0	19908000	0	0	0	0	0	2
GWLRDPNASPGDAGEQAIR	2008.97	Q64727	Vcl	Vinculin	3	0.00094086	36.253	0	0	0	20140000	0	0	0	0	0	2
LYEIGAGTSEVR	1293.66	Q9JHI5	Ivd	Isovaleryl-CoA dehydrogenase, mitochondrial	2	2.56e-05	103.26	34699000	26600000	27305000	20314000	0	0	0	0	0	7
LTDELAPPKPPLPEGEVPPPRPPPPEEK	3022.6	Q64727	Vcl	Vinculin	4	0.033463	13.164	0	0	0	20442000	0	0	0	0	0	2
LQGDANNLHGFEVDSR	1770.83	Q923G2	Polr2h	DNA-directed RNA polymerases I, II, and III subunit RPABC3	3	0.019066	31.647	0	0	0	20496000	0	0	0	0	0	2
IIDTSLTR	917.518	Q9D1M7	Fkbp11	Peptidyl-prolyl cis-trans isomerase FKBP11	2	0.024422	68.787	17013000	17416000	16092000	20581000	0	0	0	0	0	4
IIEEAPAPGINPEVR	1603.86	Q3TVD9	Mccc1	Methylcrotonoyl-CoA carboxylase subunit alpha, mitochondrial	2	0.0036094	71.085	21142000	24747000	0	20588000	0	0	0	0	0	3
QLQDQDKDKEDDGGHSLEQPGQQTLISLK	3249.57	P19973	Lsp1	Lymphocyte-specific protein 1	4	0.062224	16.917	15966000	14132000	21414000	20909000	0	0	0	0	0	4
QESEGSDLLENHIK	1597.76	A1ILG8	Vps13c	Vacuolar protein sorting-associated protein 13C	3	0.0049713	51.939	21976000	16759000	19877000	20943000	0	0	0	0	0	5
DIFEGVYFPAISLYK	1760.9	E9PU93	Ash2l	Set1/Ash2 histone methyltransferase complex subunit ASH2	2	0.00097948	70.089	20460000	18176000	24309000	20953000	0	0	0	0	0	4
SGDPMILSCLMEHLYTEK	2122.97	Q53WR6	Glg1	Golgi apparatus protein 1	2;3	2.81e-07	88.565	0	29418000	29094000	21012000	0	0	0	0	0	4
VDPTVENEETFMNR	1679.75	Q3U5J6	Morf4l1	Mortality factor 4-like protein 1	2	3.44e-05	96.103	0	0	19723000	21025000	0	0	0	0	0	2
VNYQANIWALK	1318.7	Q9CQ65	Mtap	S-methyl-5-thioadenosine phosphorylase	2	1.07e-06	100.02	25791000	23178000	21550000	21100000	0	0	0	0	0	5
LVDQALLTMDTYLGQFPDIK	2280.17	Q6P1B9	Bin1	Myc box-dependent-interacting protein 1	3	8.55e-05	62.002	21185000	21303000	0	21337000	0	0	0	0	0	5
TLINILTERSNAQR	1627.9	Q8C1X9	Anxa3	Annexin;Annexin A3	3	0.061533	25.718	0	20270000	0	21458000	0	0	0	0	0	2
LLEEEIQAPTSSK	1443.75	Q8K2T8	Paf1	RNA polymerase II-associated factor 1 homolog	2	0.00048711	87.777	16376000	14823000	20671000	21546000	0	0	0	0	0	2
DHTEQTETAPDASAPPSVRPK	2233.06	Q6ZPJ3	Ube2o	E2/E3 hybrid ubiquitin-protein ligase UBE2O	4	0.033346	27.523	0	0	0	21613000	0	0	0	0	0	2
NLEGWWYIR	1235.61	O89032	Sh3pxd2a	SH3 and PX domain-containing protein 2A	2	0.0043526	87.323	14821000	18248000	15257000	21704000	0	0	0	0	0	4
TALFEEISR	1064.55	Q9CU62	Smc1a	Structural maintenance of chromosomes protein 1A	2	0.014293	68.625	19254000	19982000	0	21759000	0	0	0	0	0	3
LQSEVAELK	1015.55	Q9CX00	Ist1	IST1 homolog	2	0.010608	73.573	22319000	24254000	27291000	21765000	0	0	0	0	0	7
YFSSMAEFLK	1221.57	Q8CCF0	Prpf31	U4/U6 small nuclear ribonucleoprotein Prp31	2	0.00086235	98.033	19976000	23012000	19777000	21769000	0	0	0	0	0	5
DFNMPLTISSLK	1364.7	D9J2Z9	Pdlim5	PDZ and LIM domain protein 5	2	0.0021206	72.652	17314000	0	0	21954000	0	0	0	0	0	2
LGILDLLDEECK	1416.72	D3YZ62	Myo5a;Myo5b	Unconventional myosin-Va;Unconventional myosin-Vb	2	0.0012708	82.261	23693000	28027000	15641000	22370000	0	0	0	0	0	2
GAGTGGLGLTVEGPCEAK	1672.81	Q80X90	Flnb;Flnc	Filamin-B;Filamin-C	2	1.33e-07	100.55	0	0	16285000	22734000	0	0	0	0	0	2
EFSIDVGYER	1213.56	Q3ULF7	Actr3	Actin-related protein 3	2	0.010512	64.841	0	26392000	26062000	22884000	0	0	0	0	0	3
AQPTPSSSATQSKPTPVKPNYALK	2497.32	Q3UNQ3	Wdr5	WD repeat-containing protein 5	3	0.0013506	44.105	0	0	0	23050000	0	0	0	0	0	2
GNLGMNCQQALQTLIQETDPGADYR	2792.29	Q53WR6	Glg1	Golgi apparatus protein 1	3	4.38e-09	81.312	14746000	0	22134000	23242000	0	0	0	0	0	3
DGYQMAQPVFAPK	1450.69	Q3U4N8	Csf1r	Receptor protein-tyrosine kinase;Macrophage colony-stimulating factor 1 receptor	2	5.3e-06	109.66	0	20352000	21821000	23467000	0	0	0	0	0	6
ECVLPGGETTGDMGK	1549.68	Q80V79	Msh2	DNA mismatch repair protein Msh2	2	3.36e-05	93.959	0	19662000	0	23498000	0	0	0	0	0	2
IPFDLLEK	973.548	G3UYG6	Gigyf2	PERQ amino acid-rich with GYF domain-containing protein 2	2	0.062428	54.776	23025000	0	26020000	23540000	0	0	0	0	0	4
AIHMALDCCGIAGPLEQFISDTCPK	2803.28	P40240	Cd9	CD9 antigen	3	7.02e-13	102.21	0	0	31448000	23693000	0	0	0	0	0	3
YDWLLAK	907.48	Q3TC68	Alox5	Arachidonate 5-lipoxygenase	2	0.03096	74.439	0	0	25712000	23953000	0	0	0	0	0	2
QELIAWEK	1015.53	E9PXG1	Slc6a12	Transporter;Sodium- and chloride-dependent betaine transporter	2	0.012515	81.548	21096000	0	0	23969000	0	0	0	0	0	2
YDYDSSSVR	1090.46	Q8R1F1	Fam129b	Niban-like protein 1	2	0.013409	69.812	0	15700000	0	24722000	0	0	0	0	0	2
TLLEGGYFTGNGDSSTVLPLVLK	2380.25	Q8C2N9	Msh6	DNA mismatch repair protein Msh6	2;3	1.61e-07	120.53	11346000	9570700	17183000	24774000	0	0	0	0	0	8
VEVTVFDPNSLDPNR	1700.84	F6UIS1	Ergic3	Endoplasmic reticulum-Golgi intermediate compartment protein 3	2	5.69e-05	90.653	13542000	15890000	0	24869000	0	0	0	0	0	3
AINFNFGYAK	1143.57	Q8BU21	Qars		2	0.0036405	78.324	0	0	0	25088000	0	0	0	0	0	3
NPEISHLLNNPDIMR	1761.88	Q9QZM0	Ubqln2	Ubiquilin-2	2;3	0.00094967	70.412	11058000	7701400	13269000	25145000	0	0	0	0	0	6
SDLLSAIR	873.492	Q8BH43	Wasf2	Wiskott-Aldrich syndrome protein family member 2	2	0.0023905	130	28489000	0	28765000	25272000	0	0	0	0	0	3
VSDIEPSMPFTK	1349.65	Q8K411	Pitrm1	Presequence protease, mitochondrial	2	3.79e-06	112.85	0	33896000	27114000	25411000	0	0	0	0	0	3
QRQEEPPPGPQRPDPPASAAAGPGNPK	2745.36	Q9D735		Uncharacterized protein C19orf43 homolog	4	3.36e-08	59.628	15104000	13258000	16619000	25478000	0	0	0	0	0	5
EAQVYEAFK	1083.52	Q9Z2I8	Suclg2	Succinyl-CoA ligase [GDP-forming] subunit beta, mitochondrial;Succinyl-CoA ligase subunit beta	2	9.64e-05	99.442	0	0	0	25531000	0	0	0	0	0	2
YYADGEDAYAMK	1395.57	B1AUY8	Naa10;Naa11	N-alpha-acetyltransferase 10;N-alpha-acetyltransferase 11	2	0.0072518	61.593	0	20156000	0	25663000	0	0	0	0	0	2
VMPFVAMIK	1034.57	Q7TSZ3	Lars	Leucine--tRNA ligase, cytoplasmic	2	0.014077	68.915	21063000	27230000	0	25719000	0	0	0	0	0	3
FVNVMSAR	922.469	Q3U273	Nagpa	N-acetylglucosamine-1-phosphodiester alpha-N-acetylglucosaminidase	2	0.026122	67.169	18402000	0	17518000	25860000	0	0	0	0	0	3
NFAELAR	819.424	Q3U0J1	Ppil1	Peptidyl-prolyl cis-trans isomerase;Peptidyl-prolyl cis-trans isomerase-like 1	2	0.013288	102.8	0	0	26983000	26341000	0	0	0	0	0	2
SFEEAFQK	984.455	E9QAI5	Cad	CAD protein;Glutamine-dependent carbamoyl-phosphate synthase;Aspartate carbamoyltransferase;Dihydroorotase	2	0.005762	102.71	32726000	0	28843000	26542000	0	0	0	0	0	3
LWALQDFSCLK	1379.69	A0JLN6	Tbl3	Transducin beta-like protein 3	2	7.06e-05	93.111	25844000	0	0	27102000	0	0	0	0	0	7
NDPEILAMTNLVSAYQNNDITEFEK	2868.35	A2AQE4	Cops2	COP9 signalosome complex subunit 2	2;3	7.64e-05	66.965	35527000	54507000	0	27275000	0	0	0	0	0	4
DSVPQVLLPEEEK	1481.76	F6WMJ3	Arhgef6	Rho guanine nucleotide exchange factor 6	2	0.00051691	80.014	0	31017000	0	27492000	0	0	0	0	0	3
FYAYNPLAGGLLTGK	1583.83	Q8CG76	Akr7a2	Aflatoxin B1 aldehyde reductase member 2	2	0.0040096	59.975	0	20890000	0	27671000	0	0	0	0	0	2
VYTFNSVR	984.503	G5E829	Atp2b1;Atp2b3;Atp2b2	Plasma membrane calcium-transporting ATPase 1;Calcium-transporting ATPase;Plasma membrane calcium-transporting ATPase 2	2	0.011469	84.097	28993000	27733000	0	27818000	0	0	0	0	0	5
YALTGDEVKK	1122.59	Q545F8	Rps4x;Rps4l;Gm15013	40S ribosomal protein S4;40S ribosomal protein S4, X isoform	2	0.0012664	112.84	15347000	0	55838000	27977000	0	0	0	0	0	4
VPLEELSEDPIVEHLGSSTEEGK	2493.21	Q9Z120	Mettl1	tRNA (guanine-N(7)-)-methyltransferase	3	0.0006959	28.675	19295000	11218000	23800000	28361000	0	0	0	0	0	5
QQLPTFLQQMQNPDTLSAMSNPR	2644.27	Q66K07	Ubqln1	Ubiquilin-1	2;3	9.12e-05	56.648	0	15800000	0	28597000	0	0	0	0	0	3
SPVASIVYELNPNFKPPK	1999.08	Q8BP47	Nars	Asparagine--tRNA ligase, cytoplasmic	3	0.0087859	27.714	0	17703000	0	28696000	0	0	0	0	0	3
LIVYQEPTDGNSFSLSQEVLR	2394.21	Q3TBT3	Tmem173	Stimulator of interferon genes protein	2;3	2.46e-05	66.325	34101000	32083000	31758000	28755000	0	0	0	0	0	7
AIACLLFGGSR	1163.61	Q8BQ03	Mcm5	DNA helicase;DNA replication licensing factor MCM5	2	2.11e-10	117.89	0	0	0	28820000	0	0	0	0	0	5
HPCEDIFGVQLEGAFPDTMTK	2391.09	Q91XI1	Dus3l	tRNA-dihydrouridine(47) synthase [NAD(P)(+)]-like	3	0.061889	13.731	0	0	0	29038000	0	0	0	0	0	2
VISESPPDQWEAR	1512.72	Q3UHQ5	Gcn1l1		2	1.45e-05	106.29	26568000	22280000	24629000	29371000	0	0	0	0	0	5
LEFITQR	905.497	Q3U4N8	Csf1r	Receptor protein-tyrosine kinase;Macrophage colony-stimulating factor 1 receptor	2	0.0074093	125.08	0	28211000	60994000	29612000	0	0	0	0	0	3
EAAVPDAVPDR	1138.56	Q80UE5	Epb4.1l2;Epb41l2	Band 4.1-like protein 2	2	0.00028572	99.815	0	24205000	0	29619000	0	0	0	0	0	2
LQDQIFNLMK	1248.65	Q32MD7	Rgs10	Regulator of G-protein signaling 10	2	2.75e-06	176.75	0	21808000	28169000	29779000	0	0	0	0	0	3
SIFASPESVTGK	1221.62	Q3TGV3	Smndc1	Survival of motor neuron-related-splicing factor 30	2	0.0031667	68.355	0	0	0	29831000	0	0	0	0	0	2
DDQIHILK	980.529	Q3TC68	Alox5	Arachidonate 5-lipoxygenase	2	0.048147	58.596	0	0	0	29895000	0	0	0	0	0	2
DYNVQIK	878.45	Q3V1M8	Hdlbp	Vigilin	2	0.032086	72.021	0	0	28150000	30003000	0	0	0	0	0	6
AQEAAAEEPPPAVTPAASVSALDLGEQR	2774.37	Q9CXS4	Cenpv	Centromere protein V	2;3	9.62e-09	73.936	22711000	7257900	0	30045000	0	0	0	0	0	5
NLCDLGIVDPYPPLCDIK	2101.02	Q58E65	Metap2	Methionine aminopeptidase 2	2	7.88e-13	136.99	9062600	8475800	20539000	30887000	0	0	0	0	0	10
YLVPQAR	845.476	Q8CGK3	Lonp1	Lon protease homolog, mitochondrial	2	0.034774	72.021	35880000	35224000	34349000	30904000	0	0	0	0	0	4
AGEQQETASLELLKEPPR	1995.03	Q80Y35	Numa1		3	0.0065789	31.036	0	0	34716000	30983000	0	0	0	0	0	2
LLLLDTQQESGMLLR	1728.94	Q5SWD9	Tsr1	Pre-rRNA-processing protein TSR1 homolog	2	9.13e-10	126.67	31804000	26697000	24954000	31047000	0	0	0	0	0	7
GTLWEGGIR	987.514	P50429	Arsb	Arylsulfatase B	2	0.004477	86.833	28101000	29093000	43670000	31127000	0	0	0	0	0	7
STLSPDQQLTAWSYDQLPK	2177.06	Q9ES52	Inpp5d	Phosphatidylinositol 3,4,5-trisphosphate 5-phosphatase 1	2;3	1.19e-12	120.14	22150000	20652000	39515000	31136000	0	0	0	0	0	10
EILGGLTVTR	1057.61	A2AJ72	Fubp3		2	0.055936	47.561	30113000	34234000	0	31353000	0	0	0	0	0	3
GCIPTMAR	904.426	Q9CTC7	Slc25a11	Mitochondrial 2-oxoglutarate/malate carrier protein	2	0.066529	53.679	0	0	0	31461000	0	0	0	0	0	2
FAEALGSTEAK	1122.56	G3UYD0	Gtf2i	General transcription factor II-I	2	7.26e-05	114.5	36159000	33372000	32710000	31657000	0	0	0	0	0	4
LEGWELFPTPK	1315.68	G5E814	Ndufa11	NADH dehydrogenase [ubiquinone] 1 alpha subcomplex subunit 11	2	0.02389	55.461	0	0	40060000	31763000	0	0	0	0	0	3
TCLICADTFR	1255.57	P14576	Srp54;Srp54c	Signal recognition particle 54 kDa protein	2	0.010578	64.711	32489000	0	0	31862000	0	0	0	0	0	2
ACPRPEGLNFQDLR	1671.82	Q99KL9	Rpa2	Replication protein A 32 kDa subunit	3	0.0079568	36.928	0	0	26982000	32091000	0	0	0	0	0	2
NEPPLTCPYSLK	1417.69	Q80YG4	Sec63	Translocation protein SEC63 homolog	2	0.013899	57.347	0	27623000	24682000	32125000	0	0	0	0	0	3
GIVLLEELLPK	1222.75	G3X9U9	Fis1	Mitochondrial fission 1 protein	2	7.06e-07	108.98	34421000	35831000	37069000	32206000	0	0	0	0	0	11
ALIDQEVK	914.507	D3YUG4	Lypla1	Acyl-protein thioesterase 1	2	0.0081508	92.187	30099000	29785000	33585000	32420000	0	0	0	0	0	4
SLGLQLPDGQR	1182.64	Q5SUR0	Pfas	Phosphoribosylformylglycinamidine synthase	2	0.00068445	90.263	0	26697000	0	32842000	0	0	0	0	0	4
AIYQATYR	984.503	O55234	Psmb5	Proteasome subunit beta type-5	2	0.0040426	114.78	0	0	0	32942000	0	0	0	0	0	2
NWRDPDQTDGPGLGYLSSHIANVER	2796.32	Q6PAC1	Gsn	Gelsolin	4	0.00074286	45.611	0	0	17200000	33140000	0	0	0	0	0	2
VVEEAPSIFLDPETR	1700.86	Q3UGC8	Pcca	Propionyl-CoA carboxylase alpha chain, mitochondrial	2	2.19e-05	116.01	43142000	0	0	33300000	0	0	0	0	0	2
TEPQVLATLLR	1239.72	Q8VI75	Ipo4	Importin-4	2	0.0044164	82.749	31456000	42838000	34193000	33484000	0	0	0	0	0	4
VGGNIEVLGFNAR	1344.71	Q5DTP7	Chd4;Chd5	Chromodomain-helicase-DNA-binding protein 4;Chromodomain-helicase-DNA-binding protein 5	2	1.43e-07	163.65	38574000	29379000	36172000	33878000	0	0	0	0	0	5
IVGGVSDANSYYR	1399.67	Q9DAV9	Tmem38b	Trimeric intracellular cation channel type B	2	4.26e-05	119.53	37522000	35430000	0	34142000	0	0	0	0	0	3
DVQELLTQYTK	1336.69	P14576	Srp54	Signal recognition particle 54 kDa protein	2	1.39e-07	142.83	37375000	0	36471000	34180000	0	0	0	0	0	3
ANDQEPCGWWLAK	1573.7	Q61584	Fxr1	Fragile X mental retardation syndrome-related protein 1	2	0.00051416	80.102	28999000	30901000	25170000	34222000	0	0	0	0	0	5
LSSDCEDQIR	1221.53	Q53WR6	Glg1	Golgi apparatus protein 1	2	1.02e-06	154.49	25126000	28417000	39324000	34439000	0	0	0	0	0	4
GDVDVNVEDK	1088.5	Q8CIH5	Plcg2	1-phosphatidylinositol 4,5-bisphosphate phosphodiesterase gamma-2	2	0.0011473	93.938	25303000	34016000	40041000	34621000	0	0	0	0	0	4
GGVAGGSILK	857.497	Q3UIJ2	Eif2s3x;Eif2s3y	Eukaryotic translation initiation factor 2 subunit 3, X-linked;Eukaryotic translation initiation factor 2 subunit 3, Y-linked	2	0.033603	55.37	0	43259000	0	35469000	0	0	0	0	0	2
AFGPGIEGK	874.455	Q80X90	Flnb	Filamin-B	2	0.01085	73.248	0	0	0	35730000	0	0	0	0	0	3
EYVGIVR	834.46	Q3TM67	Dkc1	H/ACA ribonucleoprotein complex subunit 4	2	0.021508	83.087	38878000	0	35710000	35951000	0	0	0	0	0	3
VPITAVIAAK	981.622	Q3U4M7	Tpp2	Tripeptidyl-peptidase 2	2	0.0017773	89.401	35502000	28376000	36098000	35987000	0	0	0	0	0	5
AFLAELEQNSPK	1345.69	B1ARU4	Macf1	Microtubule-actin cross-linking factor 1	2	8.69e-27	185.6	29320000	0	27800000	36166000	0	0	0	0	0	9
ACFTMDPK	968.41	Q7TPT7	Vars	Valine--tRNA ligase	2	0.03955	60.895	35411000	42408000	33764000	37624000	0	0	0	0	0	4
LTTVPPNVAELK	1280.73	Q9D031	Rsu1	Ras suppressor protein 1	2	0.020511	53.124	0	0	38687000	37913000	0	0	0	0	0	2
LPEASQSPLVLK	1280.73	M1VB37	Mta1	Metastasis-associated protein MTA1	2	3.48e-07	130.01	0	0	38687000	37913000	0	0	0	0	0	2
IGSTIFGER	978.513	Q544R1	Prosc	Proline synthase co-transcribed bacterial homolog protein	2	0.013568	69.598	41829000	44955000	0	39781000	0	0	0	0	0	4
FYALDPSFPR	1211.6	Q1HFZ0	Nsun2	tRNA (cytosine(34)-C(5))-methyltransferase	2	5.76e-09	122.52	44551000	0	0	40173000	0	0	0	0	0	27
AAFQSLLDAR	1090.58	Q63829	Commd3	COMM domain-containing protein 3	2	0.00081095	99.139	33865000	33951000	42388000	40189000	0	0	0	0	0	4
NIPMLFVR	988.553	P62311	Lsm3	U6 snRNA-associated Sm-like protein LSm3	2	0.0091817	89.673	67117000	0	0	40298000	0	0	0	0	0	2
EIVIEERPSQELTDLNGVR	2196.14	Q9CQT1	Mri1	Methylthioribose-1-phosphate isomerase	3	0.013969	51.487	0	0	0	40410000	0	0	0	0	0	2
LDPVLYR	874.491	Q53WR6	Glg1	Golgi apparatus protein 1	2	0.018108	89.903	30719000	41340000	0	40764000	0	0	0	0	0	3
LNEIVDQIK	1070.6	Q9CQK7	Rwdd1	RWD domain-containing protein 1	2	0.0012852	107.69	32953000	0	43932000	40775000	0	0	0	0	0	6
RVEIMEEESEQ	1377.61	E9PYI8	Usp14	Ubiquitin carboxyl-terminal hydrolase;Ubiquitin carboxyl-terminal hydrolase 14	2	0.0056422	84.17	51485000	0	0	40976000	0	0	0	0	0	2
ALNEACESVIQTACK	1692.78	Q53WR6	Glg1	Golgi apparatus protein 1	2	0.001357	66.004	35173000	0	0	43710000	0	0	0	0	0	2
ATEAMAPQLSLDNCYEVLSAGK	2367.11	Q8BNW9	Kbtbd11	Kelch repeat and BTB domain-containing protein 11	2;3	1.45e-10	130.24	40873000	45707000	15480000	43746000	0	0	0	0	0	8
LVEEIRQSCGGLQLQNEDVYMATK	2780.35	Q8K009	Aldh1l2	Mitochondrial 10-formyltetrahydrofolate dehydrogenase	3	0.085029	12.802	0	0	37765000	43980000	0	0	0	0	0	2
SFAGSVSPQEEEEFRR	1853.85	Q8BQ03	Mcm5	DNA helicase;DNA replication licensing factor MCM5	3	5.04e-06	75.463	0	0	0	44024000	0	0	0	0	0	2
NVLDTSWPTPPPALR	1662.87	Q9WTI7	Myo1c	Unconventional myosin-Ic	2	3.25e-21	160.52	0	0	0	44849000	0	0	0	0	0	2
FQVATDALK	991.534	Q80Y35	Numa1		2	0.004902	85.161	0	0	58991000	45011000	0	0	0	0	0	4
AFGSILNLVPLAESVVK	1756.01	P04184	Tk1;Tk1b;Tk1a	Thymidine kinase, cytosolic;Thymidine kinase	2	6.04e-06	109.15	0	0	33289000	46098000	0	0	0	0	0	2
IEYDDQNDGSCDVK	1656.66	Q80X90	Flnb	Filamin-B	2	2.44e-11	142.08	0	0	0	47246000	0	0	0	0	0	2
AVQLTQALDTNTVGALLAEK	2055.12	Q3UPL0	Sec31a	Protein transport protein Sec31A	2;3	1.75e-16	135.37	38815000	41946000	37519000	47734000	0	0	0	0	0	8
LENELSTALQDK	1359.69	Q80Y35	Numa1		2	0.00021577	108.9	49261000	44328000	46270000	48560000	0	0	0	0	0	3
ILDEDGLLDLIR	1383.76	G3UWX1	Rfc1	Replication factor C subunit 1	2	2.05e-09	143.61	0	0	0	48973000	0	0	0	0	0	4
DATSLNQAALYR	1321.66	Q3UHW2	Hsd17b4	Peroxisomal multifunctional enzyme type 2;(3R)-hydroxyacyl-CoA dehydrogenase;Enoyl-CoA hydratase 2	2	1.04e-13	166.16	51892000	52308000	52140000	49402000	0	0	0	0	0	8
SPACFTLQELK	1292.64	Q91YS2	Rangap1	Ran GTPase-activating protein 1	2	3.82e-05	132.88	0	0	0	49861000	0	0	0	0	0	2
HWGGNVLGPK	1063.56	Q6P1A9	Rpl7a;Gm4978	60S ribosomal protein L7a	2	0.0030218	80.438	0	24007000	44893000	50089000	0	0	0	0	0	3
GGAAVDPDSGLEHSAHVLEK	1987.96	Q921K2	Parp1	Poly [ADP-ribose] polymerase 1	2;3	3.65e-05	73.624	27804000	0	10142000	50125000	0	0	0	0	0	6
ICALDCGLK	1048.5	E9QAI5	Cad	CAD protein;Glutamine-dependent carbamoyl-phosphate synthase;Aspartate carbamoyltransferase;Dihydroorotase	2	0.004477	86.833	52985000	51974000	60050000	50311000	0	0	0	0	0	4
DGILYQQHVK	1199.63	Q14AA1	Dok3	Docking protein 3	3	0.07431	22.339	68050000	0	0	52089000	0	0	0	0	0	2
IGITNHDEYSLVR	1515.77	Q80TM2	Tln1	Talin-1	3	0.00092537	58.487	0	0	57953000	52259000	0	0	0	0	0	2
ELLQLADALGPSICMLK	1870.99	Q544K9	Umps	Uridine 5-monophosphate synthase;Orotate phosphoribosyltransferase;Orotidine 5-phosphate decarboxylase	2	6.88e-43	189.99	0	0	0	52512000	0	0	0	0	0	2
PRPAPAIGEAEDKENQQAANGPNQPSAR	2912.41	Q68G78	Ybx3;Igf2bp3	Y-box-binding protein 3	3;4	2.11e-22	121.84	0	0	9487000	52840000	0	0	0	0	0	4
EALQDVEDENQ	1288.54	Q5SS40	Ywhae	14-3-3 protein epsilon	2	0.00030776	98.582	67123000	89751000	0	52954000	0	0	0	0	0	3
TLMGQCQDLR	1220.56	F6WMJ3	Arhgef6	Rho guanine nucleotide exchange factor 6	2	0.0060992	88.37	61424000	50655000	60111000	53344000	0	0	0	0	0	4
APMILNGVCVIWK	1499.8	Q08024	Cbfb	Core-binding factor subunit beta	2	0.016136	52.255	0	0	68846000	57145000	0	0	0	0	0	2
EQLSDMMMINK	1338.6	Q9JKF1	Iqgap1	Ras GTPase-activating-like protein IQGAP1	2	0.0026677	75.571	0	0	0	59129000	0	0	0	0	0	3
EDLFIVSK	949.512	P45377	Akr1b10;Akr1b7;Akr1b8	Aldose reductase-related protein 1;Aldose reductase-related protein 2	2	0.0099926	87.696	0	45202000	0	60594000	0	0	0	0	0	2
VPDFSDYR	997.451	Q9CR68	Uqcrfs1	Cytochrome b-c1 complex subunit Rieske, mitochondrial;Cytochrome b-c1 complex subunit 11	2	3.26e-05	165.11	85025000	84185000	0	63297000	0	0	0	0	0	3
QIMENAEINNIIK	1528.79	Q01320	Top2a;Top2b	DNA topoisomerase 2-alpha;DNA topoisomerase 2-beta	2	1.44e-05	106.35	48576000	0	62191000	64099000	0	0	0	0	0	3
EYFGGFGEVESIELPMDNK	2159.97	F6ZV59	Hnrnpd	Heterogeneous nuclear ribonucleoprotein D0	2	1.94e-12	116.19	0	0	0	64868000	0	0	0	0	0	5
ASDPGLPAEEPK	1209.59	E9QAI5	Cad	CAD protein;Glutamine-dependent carbamoyl-phosphate synthase;Aspartate carbamoyltransferase;Dihydroorotase	2	0.00015249	91.549	52348000	0	47194000	66610000	0	0	0	0	0	3
GTVGSILDR	916.498	Q6NXX7	Abce1	ATP-binding cassette sub-family E member 1	2	3.09e-09	127.46	0	69658000	0	66883000	0	0	0	0	0	6
YMDAWNTVSR	1241.55	P62075	Timm13	Mitochondrial import inner membrane translocase subunit Tim13	2	0.0028118	81.95	0	0	0	67263000	0	0	0	0	0	2
MSGIDATTALSVGAPDVTLK	1946	E9Q616	Ahnak		2;3	1.75e-16	135.37	92314000	90566000	83864000	67436000	0	0	0	0	0	9
LNPADAPNPVVFVATK	1651.89	Q3TZP3	Mta2	Metastasis-associated protein MTA2	2	4.72e-11	140.16	0	63173000	0	68675000	0	0	0	0	0	4
ELEDLLSPLEESVK	1599.82	Q5FWJ9	Nup62	Nuclear pore glycoprotein p62	2	0.0019293	89.266	0	66488000	0	73558000	0	0	0	0	0	2
LVFSNVNLK	1032.6	Q3U1J4	Ddb1	DNA damage-binding protein 1	1;2	0.00047867	127.12	85560000	84362000	93570000	73773000	0	0	0	0	0	5
EEIVYLPCIYR	1453.73	P17563	Selenbp1;Selenbp2	Selenium-binding protein 1;Selenium-binding protein 2	2	0.00036098	95.605	0	97121000	93040000	77242000	0	0	0	0	0	5
VNVPGSQAQLK	1139.63	Q8BRD3	Nucb1	Nucleobindin-1	2	7.79e-06	134.25	96452000	85827000	80485000	80173000	0	0	0	0	0	6
SGGMSNELNNIISR	1490.71	Q3TED3	Acly	ATP-citrate synthase	2	0.0018898	68.44	70773000	67676000	0	81037000	0	0	0	0	0	3
QLLEEELAR	1099.59	Q9QXS1	Plec	Plectin	2	0.0015646	93.162	0	0	0	83123000	0	0	0	0	0	3
GDVDVTVPK	928.487	E9Q616	Ahnak		2	0.017767	63.961	96532000	92655000	97414000	83682000	0	0	0	0	0	5
ADFQGISPER	1118.54	P61804	Dad1	Dolichyl-diphosphooligosaccharide--protein glycosyltransferase subunit DAD1	2	0.0029211	81.163	78974000	81454000	80923000	86012000	0	0	0	0	0	4
NYNDELQFLDK	1397.65	Q3TJ01	Rtcb	tRNA-splicing ligase RtcB homolog	2	4.52e-05	120.22	93645000	85213000	0	86018000	0	0	0	0	0	5
GLPFGCSK	864.416	Q811L7	Hnrnph1;Hnrnph3;Hnrnph2	Heterogeneous nuclear ribonucleoprotein H;Heterogeneous nuclear ribonucleoprotein H, N-terminally processed;Heterogeneous nuclear ribonucleoprotein H2	2	0.047837	58.679	73358000	79011000	83717000	87984000	0	0	0	0	0	4
GEGPELDVNMPK	1284.6	E9Q616	Ahnak		2	8.84e-05	93.667	141560000	137720000	152530000	105790000	0	0	0	0	0	5
LAEDEAFQR	1077.51	Q9QXS1	Plec	Plectin	2	0.0080021	77.072	0	0	94969000	125270000	0	0	0	0	0	3
MCLFAGFQR	1128.52	Q8C290	Hnrnpu;Gm28062	Heterogeneous nuclear ribonucleoprotein U	2	0.00025566	135.87	168390000	159290000	230210000	138460000	0	0	0	0	0	2
GEMDTFPTFK	1171.52	P97450	Atp5j	ATP synthase-coupling factor 6, mitochondrial	2	2.9e-05	135.79	0	168880000	0	153180000	0	0	0	0	0	2
GGPLSDSYR	950.446	P00920	Ca2;Car2	Carbonic anhydrase 2	2	3.36e-19	150.84	0	169260000	0	156020000	0	0	0	0	0	12
LPVDVAYQR	1059.57	Q9QXS1	Plec	Plectin	2	0.0026264	94.114	0	0	0	188660000	0	0	0	0	0	2
DLATFLYHLR	1247.67	Q6P6P5	Slc12a6	Solute carrier family 12 member 6	3	0.02579	44.318	0	0	1657600	0	1667300	0	0	0	0	3
WTAISALEYGMPVTLIGEAVFAR	2494.29	Q91V28	Pgd	6-phosphogluconate dehydrogenase, decarboxylating	2	0.016509	31.827	0	2524000	0	0	2163400	0	0	0	0	2
ADIPLMVIIGEQER	1582.84	G5E823	Hars2	Probable histidine--tRNA ligase, mitochondrial	2;3	0.050024	56.094	0	3618700	0	3330000	2312300	0	0	0	0	2
EVQTNDLK	945.477	Q564F3	Rps3a1;Rps3a	40S ribosomal protein S3a	2	0.045869	59.205	0	2149100	0	0	2425300	0	0	0	0	2
VDSFNSLYMLVK	1414.72	Q5PPR2	Exoc1	Exocyst complex component 1	2	0.04607	49.418	3030100	0	0	3358600	2639100	0	0	0	0	2
THQVSAAPTSSAGDGFK	1659.79	P32020	Scp2	Non-specific lipid-transfer protein	2	0.00017467	72.089	0	0	3327000	0	2678700	0	0	0	0	2
EVIYICPFNGPIK	1548.8	Q3UDN6	Mtm1	Myotubularin	2	2.46e-05	102.61	0	3904000	0	4922300	2754500	0	0	0	0	4
DIFMFITR	1041.53	F8WHU5	Pds5b	Sister chromatid cohesion protein PDS5 homolog B	2	0.03	63.48	0	3356900	0	0	3058700	0	0	0	0	2
ASYISSAQLDQPDPGAVAAAAIFR	2418.22	Q8VC30	Dak	Bifunctional ATP-dependent dihydroxyacetone kinase/FAD-AMP lyase (cyclizing);ATP-dependent dihydroxyacetone kinase;FAD-AMP lyase (cyclizing)	2	0.0073171	39.005	0	4327700	0	0	3263000	0	0	0	0	3
SNVNDGVAQSTR	1246.59	P17751	Tpi1	Triosephosphate isomerase	2	0.0075933	72.006	4505900	0	0	0	3543300	0	0	0	0	2
SGTFCLADTCLLLMDK	1843.85	Q3T9Y9	Ptpn1	Tyrosine-protein phosphatase non-receptor type;Tyrosine-protein phosphatase non-receptor type 1	2	0.0055317	53.252	5055500	4177500	0	0	3550200	0	0	0	0	3
SLLAEIEDLR	1157.63	E9QQ10	Akap9	A-kinase anchor protein 9	2	0.010276	65.305	4161200	0	0	0	3679600	0	0	0	0	2
TAAFVLAMLSR	1178.65	Q61655	Ddx19a;Ddx25	ATP-dependent RNA helicase DDX19A;ATP-dependent RNA helicase DDX25	2	0.028451	53.327	1683400	0	0	2038500	3708900	0	0	0	0	3
NGFSLEEVLR	1162.6	P53569	Cebpz	CCAAT/enhancer-binding protein zeta	2	0.012934	62.823	0	0	5740100	0	3762400	0	0	0	0	2
ITGLCPYGPQEILVADEQNR	2272.12	Q80VI1	Trim56	E3 ubiquitin-protein ligase TRIM56	2	0.0095506	42.789	0	0	7157400	7213100	3807100	0	0	0	0	3
SGGYTVLQVVEALGSSLENAEPR	2375.2	Q9D071	Mms19	MMS19 nucleotide excision repair protein homolog	3	5.09e-06	47.564	5596000	0	0	0	3857800	0	0	0	0	3
FATEAAITILR	1204.68	P11983	Tcp1	T-complex protein 1 subunit alpha	2;3	0.00016444	88.496	0	0	0	0	4174700	0	0	0	0	3
QFDASTPQSGSNPSR	1577.71	Q8BHK9	Ercc6l	DNA excision repair protein ERCC-6-like	2	0.073521	44.765	0	0	0	0	4188200	0	0	0	0	2
PSQQYATLDVYNPFENR	2040.95	Q3UXS0	Scamp3;Tu52	Secretory carrier-associated membrane protein 3	2	0.0070985	47.037	5465200	0	0	0	4281700	0	0	0	0	2
VVNQLAAAYEQDLLPGGCTLR	2287.16	Q3UGS9	Clpb	Caseinolytic peptidase B protein homolog	2	0.00096485	48.704	0	0	6479600	0	4304000	0	0	0	0	6
VSGSELVQK	945.513	P62196	Psmc5	26S protease regulatory subunit 8	2	0.012009	71.692	0	4892200	0	0	4361700	0	0	0	0	2
VPLQGFAALEGMNGIQK	1771.93	Q4JG03	Huwe1	E3 ubiquitin-protein ligase HUWE1	2;3	2.22e-07	103.75	0	13372000	0	0	4560100	0	0	0	0	2
GDVENTILDILGGLR	1583.85	Q9DCZ1	Gmpr	GMP reductase 1	2;3	1.14e-05	104.32	5848400	13217000	5692800	7628200	4598500	0	0	0	0	9
FFLVFSK	886.495	E9QAN2	Papola;Papolg	Poly(A) polymerase alpha;Poly(A) polymerase gamma	2	0.060214	60.76	0	0	5510300	0	4601200	0	0	0	0	2
PSWADQVEEEGEDDK	1732.71	Q544H0	Eif3g	Eukaryotic translation initiation factor 3 subunit G	2	2.7e-06	109.72	6144700	6657600	0	0	4765300	0	0	0	0	3
ALQSLACGKPTQR	1428.75	Q6ZQ84	mKIAA0617;Cul3	Cullin-3	2	0.008954	77.379	0	0	8622500	6772600	4775500	0	0	0	0	3
ILTNSNLPEEELDFFEILR	2291.17	Q543X5	Cnot7	CCR4-NOT transcription complex subunit 7	2	0.0010013	55.452	0	0	0	0	4825800	0	0	0	0	2
NLWAAVLQQNGVLER	1709.92	Q9EPL9	Acox3	Peroxisomal acyl-coenzyme A oxidase 3	2	6.55e-05	89.43	7215400	7255500	7759800	3513000	4827900	0	0	0	0	9
TQLAVCQQR	1102.56	P30416	Fkbp4	Peptidyl-prolyl cis-trans isomerase FKBP4;Peptidyl-prolyl cis-trans isomerase FKBP4, N-terminally processed	2	0.018125	63.48	0	5084300	0	0	4836700	0	0	0	0	2
LASAPVPFTVLSLTGNPCK	1971.05	A2AN08	Ubr4	E3 ubiquitin-protein ligase UBR4	2;3	5.41e-07	91.858	8016200	7609000	8321700	12080000	4960900	0	0	0	0	5
NNPEYSSFFGVMGASSAMVFSAMGAAYGTAK	3149.39	E9Q9C5	Atp6v0c;Gm15487	V-type proton ATPase 16 kDa proteolipid subunit	3	0.012957	27.863	0	0	2602900	0	4963200	0	0	0	0	2
QNEENILNCFDK	1522.67	E9QJV4	Prpf39	Pre-mRNA-processing factor 39	2	0.017925	54.776	0	8319400	8723500	4918500	4977200	0	0	0	0	3
FLQLCIFPR	1192.64	B1AZI6	Thoc2;BC005561	THO complex subunit 2	2	0.0037541	89.369	4047600	0	5798400	4671100	4982900	0	0	0	0	7
SPAASGAPQAPAPAALLAGSPGGDAAPGPAPASSAPAGGEDAEK	3761.81	Q68G78	Ybx3	Y-box-binding protein 3	3;4	0.055216	7.5599	0	5026600	0	16335000	4985900	0	0	0	0	4
GQAIPELDSNLQAR	1510.77	Q8CB73	Haus6;mKIAA1574		2	0.057072	41.283	0	0	0	0	4992400	0	0	0	0	3
LSTVASTDILATVLEEMPPFPER	2515.29	Q6PEE6	Ap2a2	AP-2 complex subunit alpha-2	3	0.048025	21.564	0	7019600	0	0	5059500	0	0	0	0	2
ESLVNVPLQLIESVECR	1984.03	Q66I45	Mtmr3	Myotubularin-related protein 3	2	0.00032593	65.563	5245600	0	0	0	5067600	0	0	0	0	2
VADLTEQYNEQYGAVR	1854.87	B0LM42	Gm21992;Rbm4	RNA-binding protein 4	2	8.31e-06	98.353	7893900	3305500	0	0	5082100	0	0	0	0	8
ATTVNIGSISTADGSALVK	1803.96	Q3TEB9	Exosc8	Exosome complex component RRP43	2	0.020962	45.992	9937900	0	7181500	8235100	5098200	0	0	0	0	2
EEFVQWVELLPDAQTPSWLGLPNNAER	3137.55	Q9JHU4	Dync1h1	Cytoplasmic dynein 1 heavy chain 1	3	0.053749	16.938	0	0	0	0	5098600	0	0	0	0	2
GPDGVCIPCQPGQPGQLVGR	2091	Q9CV67	Slc27a4	Long-chain fatty acid transport protein 4	2	0.024512	33.782	0	0	0	0	5185900	0	0	0	0	2
LALPSPALEYTLGSR	1586.87	Q8R3Y8	Irf2bp1	Interferon regulatory factor 2-binding protein 1	2	0.030822	44.299	0	0	0	7633900	5202700	0	0	0	0	3
VEFDEEFSGTPAEGTGEETLTPSAPVNK	2937.34	Q64511	Top2b	DNA topoisomerase 2-beta	2	0.064022	25.054	0	0	10958000	5884800	5229200	0	0	0	0	4
ISLLQSEFPQAVYIDSYSSR	2302.15	Q9JKL4	Ndufaf3	NADH dehydrogenase [ubiquinone] 1 alpha subcomplex assembly factor 3	2	0.016547	49.627	5490800	0	0	0	5257500	0	0	0	0	2
LPLPYGFSAMQGWR	1621.81	Q61074	Ppm1g	Protein phosphatase 1G	2;3	4.37e-11	141.95	0	28738000	0	44403000	5267600	0	0	0	0	6
FAGYVTSIAATELEDDDDDYSSSTSLLGQK	3197.44	G5E866	Sf3b1	Splicing factor 3B subunit 1	3	0.034046	21.467	8673300	9399800	0	5354100	5292800	0	0	0	0	4
DIEEHLQR	1038.51	Q3TYJ0	Stub1	STIP1 homology and U box-containing protein 1	2	0.024287	68.915	0	0	7106700	0	5361500	0	0	0	0	2
LQANFFEMDIPK	1451.71	Q8CJG0	Ago2	Protein argonaute-2	2	0.023153	51.436	0	11163000	0	0	5377700	0	0	0	0	2
TELFDLK	864.459	Q5BL05	Cux1	Homeobox protein cut-like;Homeobox protein cut-like 1;Protein CASP	2	0.075671	57.281	0	0	0	6571700	5382400	0	0	0	0	2
QHLEITGGQVR	1236.66	Q8BU21	Qars		2	0.0061998	65.305	0	0	6696600	0	5411800	0	0	0	0	2
QFLLSDINQSVK	1390.75	G3X9Q4	Fars2	Phenylalanine--tRNA ligase, mitochondrial	2	0.00028124	87.298	0	7782200	0	0	5419500	0	0	0	0	2
APVLSIDPPVHEVEQGIDAK	2113.11	A0ELI5	Edc3	Enhancer of mRNA-decapping protein 3	3	0.012957	31.402	0	0	0	11501000	5439200	0	0	0	0	2
LINNAITALLSQEGDVVASNAELESQFQAVR	3299.7	G3X922	Dnajc13		3	2.84e-06	51.296	0	0	7677200	0	5451600	0	0	0	0	3
GLFLLPCLNR	1201.66	E9QN92	Steap3		2	0.0043666	76.899	4998700	0	6848000	5003900	5465700	0	0	0	0	5
IGVPQEQLCLPLHILEEK	2115.14	B7ZWM8	Lrch3	Leucine-rich repeat and calponin homology domain-containing protein 3	3	0.018524	20.596	0	0	0	0	5475500	0	0	0	0	3
LAGENMTGAAK	1061.52	B1AU25	Aifm1;Pdcd8	Apoptosis-inducing factor 1, mitochondrial	2	0.0011832	82.749	0	9506500	7373000	0	5478900	0	0	0	0	3
VGAEVPFSPGLYANQAEILLSNHYTSSEVK	3219.61	Q9QY81	Nup210	Nuclear pore membrane glycoprotein 210	3	0.029585	22.888	0	0	0	0	5565800	0	0	0	0	3
VVLVNNILQNAQER	1608.89	Q3UY32	Snapin	SNARE-associated protein Snapin	3	0.018587	31.071	5754000	0	8355100	0	5592400	0	0	0	0	4
PSSAEDTSPAPVSAPAPPVR	1931.96	E9QP49	Ehbp1l1	EH domain-binding protein 1-like protein 1	2	6.13e-05	69.602	5283000	0	0	0	5597500	0	0	0	0	5
VGEMAPPNAYTVTDLVEYSIVIEQLSNGK	3136.56	Q3UG68	Ddost	Dolichyl-diphosphooligosaccharide--protein glycosyltransferase 48 kDa subunit	3	7.3e-09	71.974	0	12006000	0	0	5633200	0	0	0	0	2
AIPLAIFQAEPTVR	1524.87	Q3UR94	Pole	DNA polymerase;DNA polymerase epsilon catalytic subunit A	2;3	0.0026394	63.408	0	4929100	10272000	2873200	5653900	0	0	0	0	4
GEDDSWDFGTGAGFYVNATEDPWK	2663.11	H3BJP2	Esd	S-formylglutathione hydrolase	2	0.00019623	52.823	0	5629400	0	0	5699600	0	0	0	0	2
NGYGFVEFDDLR	1430.65	Q542V3	Srsf4	Serine/arginine-rich splicing factor 4	2	0.00015249	91.549	0	6363800	4482200	0	5731300	0	0	0	0	3
QVVTLLNELKR	1311.79	Q921H8	Acaa1a;Acaa1b	3-ketoacyl-CoA thiolase A, peroxisomal;3-ketoacyl-CoA thiolase B, peroxisomal	2;3	0.019042	72.643	5442500	0	0	0	5732100	0	0	0	0	2
DELSDISQGGSK	1234.57	B8X349	Spag9		2	0.0059186	66.056	0	0	0	0	5772100	0	0	0	0	3
ILVQNEEDEITATVTR	1829.94	F1AHI9	Dock10	Dedicator of cytokinesis protein 10	2	1.04e-05	95.018	0	0	0	0	5883100	0	0	0	0	5
AFAGDIANQLATDAVQIFGGYGFNTEYPVEK	3305.59	P45952	Acadm	Medium-chain specific acyl-CoA dehydrogenase, mitochondrial	3	0.00020108	44.721	8087000	9537800	7011000	0	5889900	0	0	0	0	5
CTTQLTQGAASGTGK	1479.7	B2RWU7	AI607873		2	6.57e-05	89.403	0	0	0	0	5907300	0	0	0	0	2
QLEDCLILQTLLHSK	1809.97	A0A0A6YWM5	Rab3gap2	Rab3 GTPase-activating protein non-catalytic subunit	3	0.028419	26.781	5298700	0	0	0	5972600	0	0	0	0	3
TVAEVQETLAEMIR	1588.81	Q6KAS0	Gemin5	Gem-associated protein 5	2	0.00028347	81.92	0	0	0	8002700	5979900	0	0	0	0	2
ANPDPNTCLGVFGLSLYTTER	2324.11	Q3TAP5	Tra2a	Transformer-2 protein homolog alpha	2	6.12e-05	66.797	0	0	0	0	5987500	0	0	0	0	4
GVSDQVLK	844.465	Q91VT3	Abcd3		2	0.032739	62.717	0	7881300	0	0	6095200	0	0	0	0	3
EVEAIPLR	925.523	E9QN92	Steap3	Metalloreductase STEAP3	2	0.022188	70.912	0	0	0	9758300	6141900	0	0	0	0	2
ETPFELIEALLK	1401.78	E9QNN1	Dhx9	ATP-dependent RNA helicase A	2	0.0014251	75.509	0	0	0	0	6173200	0	0	0	0	2
VLGQSSSKPPPAATGPPPSNHCATQK	2613.3	Q5BL11	Adnp	Activity-dependent neuroprotector homeobox protein	4	0.064988	11.853	0	0	8650300	14409000	6289500	0	0	0	0	4
QLIEVDKDWVPDGNGTSLYVR	2403.21	O88374	Bcat2	Branched-chain-amino-acid aminotransferase;Branched-chain-amino-acid aminotransferase, mitochondrial	3	0.005186	29.126	7559400	0	0	0	6491000	0	0	0	0	2
FVEFFGPGVAQLSIADR	1851.95	Q8VDC3	aco1;Aco1	Aconitate hydratase;Cytoplasmic aconitate hydratase	2;3	0.0018912	79.089	21900000	0	30001000	18535000	6538500	0	0	0	0	4
FIEFEDSQEQEK	1527.67	B8X349	Spag9	C-Jun-amino-terminal kinase-interacting protein 4	2	0.0046064	63.283	0	7011800	0	0	6546000	0	0	0	0	2
ELIEMWR	975.485	Q3UFY8	Trmt10c	Mitochondrial ribonuclease P protein 1	2	0.0030606	95.62	7417000	7856400	7913600	8188800	6578400	0	0	0	0	6
GTSVMVTHYFLPPDDAVQSDDDSGTVPDYNQLK	3610.64	Q61191	Hcfc1	Host cell factor 1;HCF N-terminal chain 1;HCF N-terminal chain 2;HCF N-terminal chain 3;HCF N-terminal chain 4;HCF N-terminal chain 5;HCF N-terminal chain 6;HCF C-terminal chain 1;HCF C-terminal chain 2;HCF C-terminal chain 3;HCF C-terminal chain 4;HCF C-terminal chain 5;HCF C-terminal chain 6	3	0.088484	4.5767	0	0	0	0	6648200	0	0	0	0	2
YTLLLEK	878.511	Q8BJW5	Nol11	Nucleolar protein 11	2	0.068401	58.917	0	0	0	0	6665800	0	0	0	0	3
ATVQSVLLDSAGR	1315.71	H3BJ51	Retsat	All-trans-retinol 13,14-reductase	2	0.0021897	70.977	11001000	11423000	0	11172000	6672200	0	0	0	0	6
DVLEYVVFER	1267.64	Q9D0Q7	Mrpl45	39S ribosomal protein L45, mitochondrial	2	0.0019839	87.913	9433400	8398500	0	4450700	6687000	0	0	0	0	3
YIQQTKPLTLER	1488.83	Q9CQF3	Nudt21	Cleavage and polyadenylation specificity factor subunit 5	2	0.038362	77.677	0	0	0	0	6723400	0	0	0	0	2
TQNTLASDSLAR	1275.64	Q6PIU9		Uncharacterized protein FLJ45252 homolog	2	0.0075933	73.499	0	0	11073000	0	6778100	0	0	0	0	2
YIGFETANGDIFICTQR	2003.94	Q7TSZ3	Lars	Leucine--tRNA ligase, cytoplasmic	2	1.7e-06	92.925	0	0	0	0	6830600	0	0	0	0	2
SPDGAHLTWEPPSVTSGK	1864.9	Q61191	Hcfc1	Host cell factor 1;HCF N-terminal chain 1;HCF N-terminal chain 2;HCF N-terminal chain 3;HCF N-terminal chain 4;HCF N-terminal chain 5;HCF N-terminal chain 6;HCF C-terminal chain 1;HCF C-terminal chain 2;HCF C-terminal chain 3;HCF C-terminal chain 4;HCF C-terminal chain 5;HCF C-terminal chain 6	2	0.0018591	54.524	0	0	9988600	0	6929800	0	0	0	0	3
IPVTIVTGYLGAGK	1387.81	Q8VEH6	Cbwd1	COBW domain-containing protein 1	2	0.0063399	62.466	6097400	0	5819000	0	7117900	0	0	0	0	2
EQSELDQDLEDVEEVEEEETGEETK	2937.23	Q3TF41	Nap1l1	Nucleosome assembly protein 1-like 1	2;3	7.69e-08	80.68	36749000	9947800	7669500	12385000	7138000	0	0	0	0	5
ALEQHDCEIAQEIQEK	1939.89	F6UK66	Ccdc50	Coiled-coil domain-containing protein 50	2	1.81e-08	105.17	0	0	9297700	0	7164900	0	0	0	0	6
NMNTLYPDATPEELQAVDNVCIICR	2935.35	Q9DBY1	Syvn1	E3 ubiquitin-protein ligase synoviolin	3	0.033552	24.068	8878400	7881400	0	0	7171300	0	0	0	0	3
VLFICTANVIDTIPEPLR	2070.12	Q8CGK3	Lonp1	Lon protease homolog, mitochondrial	2	1.45e-12	132.59	7411600	0	0	0	7240600	0	0	0	0	2
FSNSIPQPHAGNSAAATPTEPDLK	2449.19	E9QN31	Nop2	Probable 28S rRNA (cytosine-C(5))-methyltransferase	3	0.0096901	20.24	0	0	10002000	0	7241700	0	0	0	0	2
NVVSQFVSSMSASADVLAMSK	2157.04	Q9CR68	Uqcrfs1	Cytochrome b-c1 complex subunit Rieske, mitochondrial;Cytochrome b-c1 complex subunit 11	3	9.73e-05	40.197	8177500	0	0	0	7290400	0	0	0	0	2
LSINTQLLAR	1127.67	Q9D0D4	Dimt1	Probable dimethyladenosine transferase	2	0.020954	59.931	0	0	7470300	0	7309400	0	0	0	0	2
VIDSSDVVVQVLDAR	1613.86	Q3V3N5	Gnl2	Nucleolar GTP-binding protein 2	2	4.03e-06	128.67	8187000	7405900	0	6894600	7388300	0	0	0	0	5
LLEQGCTDFTTDLETILAAVPAR	2533.27	Q4FZF3	Ddx49	Probable ATP-dependent RNA helicase DDX49	3	0.0031667	39.659	0	5678300	4734700	0	7397300	0	0	0	0	4
CLAENAVYLCDR	1482.66	Q4FE56	Usp9x	Ubiquitin carboxyl-terminal hydrolase;Probable ubiquitin carboxyl-terminal hydrolase FAF-X	2	0.00043072	95.573	8609700	0	0	0	7521900	0	0	0	0	2
QAHLTNQYMQR	1388.66	Q8BN32	Pabpc1	Polyadenylate-binding protein;Polyadenylate-binding protein 1	3	0.0026184	46.64	0	7505000	6277600	0	7597400	0	0	0	0	3
EVYTHFTCATDTK	1571.69	Q3TJH1	Gnai3	Guanine nucleotide-binding protein G(k) subunit alpha	2	0.0025165	69.346	0	0	0	0	7600100	0	0	0	0	2
EEITTVLQDHLLK	1537.84	Q6A009	Ltn1	E3 ubiquitin-protein ligase listerin	3	0.049627	24.164	0	0	0	0	7610200	0	0	0	0	3
YSVSVFQPPFQPGR	1607.81	E9Q9M5	Usp19	Ubiquitin carboxyl-terminal hydrolase;Ubiquitin carboxyl-terminal hydrolase 19	2	0.0002391	84.268	11784000	0	0	9129900	7671700	0	0	0	0	4
ENASPAPGTTAEEAMSR	1717.76	Q3UF95	Bag6	Large proline-rich protein BAG6	2	0.0003677	63.76	13719000	0	0	0	7684800	0	0	0	0	2
LPGAIDVIGQTITISR	1652.95	D3Z4V2	Fip1l1	Pre-mRNA 3-end-processing factor FIP1	2	3.15e-05	88.187	11541000	10653000	0	0	7704300	0	0	0	0	4
SLQYGEQVSEILSR	1607.82	G3X922	Dnajc13		2	2.83e-05	89.301	0	0	0	11128000	7728000	0	0	0	0	4
DAFFCLR	927.427	G4V4Z1	gag-pro-pol;gag-pol		2	0.017269	91.584	7381100	6340600	9432700	11592000	7765700	0	0	0	0	9
FAAVLYGESGCALAR	1583.78	Q3U208	Dok2	Docking protein 2	2	0.01077	50.284	0	0	0	0	7770800	0	0	0	0	2
STQAGDDLMR	1092.49	Q3U432	Gas7	Growth arrest-specific protein 7	2	0.0014093	92.051	19954000	26979000	0	0	7771800	0	0	0	0	3
LVQTAAQQVAEDK	1399.73	Q9DD02	L7rn6;l7Rn6	Protein Hikeshi	2	0.0018063	90.05	0	13268000	11820000	0	7786400	0	0	0	0	3
QLIIEDPYYGNDSDFEVVYQQCLR	2963.36	Q4VAI2	Acp1	Low molecular weight phosphotyrosine protein phosphatase	3	0.0029216	38.724	10329000	8299500	9393900	0	7802100	0	0	0	0	4
DDYEVSCPELDQLVEAALSVPGVYGSR	2967.38	Q80UL3	Galk1	Galactokinase	3	0.00020832	46.404	12323000	13226000	0	13317000	7859100	0	0	0	0	4
TVYVGNLNSQTTTADQLLEFFK	2488.25	Q6P3Z1	Srek1	Splicing regulatory glutamine/lysine-rich protein 1	2	2.94e-15	113.4	12641000	11374000	0	0	8001000	0	0	0	0	4
LELFVLHPPPGDPAAPACALLVWQPAAPGDK	3246.69	B2RWW1	Map1s	Microtubule-associated protein 1S;MAP1S heavy chain;MAP1S light chain	3	0.013477	27.686	0	10921000	10314000	0	8035600	0	0	0	0	4
DGQLTVGLVGYPNVGK	1615.86	Q3UM18	Lsg1	Large subunit GTPase 1 homolog	2	0.025358	43.897	8964300	8439700	0	10570000	8069200	0	0	0	0	5
VDSEGPSTAPTAPR	1383.66	Q99LX5	Mmtag2	Multiple myeloma tumor-associated protein 2 homolog	2	0.0020759	67.153	0	0	0	14649000	8089900	0	0	0	0	3
WNQDTMEQK	1178.5	Q3TZI3	Sf1	Splicing factor 1	2	0.0035052	90.657	0	16377000	15291000	0	8140500	0	0	0	0	3
QVQIDGLVVLK	1210.73	Q8BTX5	Eif3h	Eukaryotic translation initiation factor 3 subunit H	2	0.0028916	74.92	0	0	0	0	8171000	0	0	0	0	2
GITINAAHVEYSTAAR	1672.85	Q8BFR5	Tufm;Gm9755	Elongation factor Tu, mitochondrial;Elongation factor Tu	2	0.0014662	62.14	0	0	0	0	8199500	0	0	0	0	2
YFYFYNTGLQNQR	1712.79	Q543B9	Prep	Prolyl endopeptidase	2;3	5.74e-33	211.02	41357000	34341000	0	9783600	8260800	0	0	0	0	3
SNMGHPEPASGLAALTK	1679.83	P19096	Fasn	Fatty acid synthase;[Acyl-carrier-protein] S-acetyltransferase;[Acyl-carrier-protein] S-malonyltransferase;3-oxoacyl-[acyl-carrier-protein] synthase;3-oxoacyl-[acyl-carrier-protein] reductase;3-hydroxyacyl-[acyl-carrier-protein] dehydratase;Enoyl-[acyl-carrier-protein] reductase;Oleoyl-[acyl-carrier-protein] hydrolase	2	0.053136	34.685	0	8080800	0	0	8290500	0	0	0	0	2
QVQGSEISSIDEFCR	1753.79	Q8BMZ7	Vps28	Vacuolar protein sorting-associated protein 28 homolog	2	1.3e-05	103.35	0	0	0	0	8296300	0	0	0	0	2
SGDAPITVQQLGTAYVSATTGAVATALGLK	2860.52	Q91V61	Sfxn3	Sideroflexin-3	3	4.61e-06	50.294	8566800	0	0	0	8355400	0	0	0	0	2
DYMDTLPPTVGDDVGK	1721.78	H3BJ30	Cpsf6	Cleavage and polyadenylation specificity factor subunit 6	2	0.0086175	53.08	0	0	0	0	8377400	0	0	0	0	2
VMAGALEGDLFIGPK	1516.8	Q8R5C5	Actr1b	Beta-centractin	2	3.85e-05	93.258	0	8612000	0	0	8443300	0	0	0	0	2
FGLYLPLFK	1096.63	Q8C140	Slc25a13	Calcium-binding mitochondrial carrier protein Aralar2	2	0.0057603	81.784	6870200	0	6323000	7211700	8454200	0	0	0	0	2
ATTSTNWILESQNINELK	2061.04	Q9QX52	Pex14	Peroxisomal membrane protein PEX14	2	0.024513	40.066	0	8814900	6814200	0	8492300	0	0	0	0	3
LEQLNQYPDFNNYLIFVLTK	2471.27	Q8BFY9	Tnpo1	Transportin-1	2;3	1.87e-06	80.96	10112000	21769000	10005000	6874400	8549500	0	0	0	0	7
LYSLSVLYK	1084.62	Q9CQW1	Ykt6	Synaptobrevin homolog YKT6	2	0.021415	62.464	0	9010800	0	0	8583400	0	0	0	0	2
IQLVAVNYIPEVR	1512.87	Q3TQY2	Dctn4	Dynactin subunit 4	2	0.0020091	88.596	0	0	0	8179800	8588800	0	0	0	0	3
INLIYSR	877.502	F7B227	Ech1	Delta(3,5)-Delta(2,4)-dienoyl-CoA isomerase, mitochondrial	2	0.016724	100.37	13816000	11925000	11673000	0	8623000	0	0	0	0	3
LVSASTDNIVSQWDVLSGDCDQR	2564.18	Q8BX09	Rbbp5	Retinoblastoma-binding protein 5	2;3	0.0088042	39.005	5120900	4025400	0	8546800	8759200	0	0	0	0	6
NTNSPEFEQVFK	1438.67	F6XC25	Cc2d1b	Coiled-coil and C2 domain-containing protein 1B	2	0.011714	58.743	0	9956200	0	0	8770300	0	0	0	0	4
CIAFGNEGEYVAAVR	1654.78	Q9CRF5	Wdr75		2	0.0008024	72.006	0	0	0	0	8833200	0	0	0	0	2
DIAWTEDSKR	1219.58	Q3TE06	Wdr1	WD repeat-containing protein 1	2	0.050262	66.435	0	0	0	0	8869900	0	0	0	0	2
SWLSYSYQSR	1275.59	B2RSV4	Sf3b3	Splicing factor 3B subunit 3	2	0.010694	64.485	14288000	0	17050000	0	8899700	0	0	0	0	5
TWTLELSPELVSMTTR	1862.94	Q6PDG0	Nup205		2	8.59e-06	97.911	9018100	0	12108000	0	8921900	0	0	0	0	4
LPVYEGNFIVK	1277.7	Q3TBM1	Man2b1	Alpha-mannosidase;Lysosomal alpha-mannosidase	2	0.019312	60.892	0	18785000	20602000	15607000	8945400	0	0	0	0	3
ILVVIEPLLIDEDYYAR	2033.11	G5E866	Sf3b1	Splicing factor 3B subunit 1	2;3	5.27e-09	93.011	0	0	0	0	8970200	0	0	0	0	2
EAALALAEGLQCGSALFR	1875.95	Q99LN9	Dohh	Deoxyhypusine hydroxylase	3	0.0663	13.427	5438700	0	0	0	8996300	0	0	0	0	2
FDSNVSGQSSFGTSPAADNIEK	2257.01	Q9CRD0	Ociad1	OCIA domain-containing protein 1	2	2.23e-07	91.207	16079000	0	14567000	10377000	9109300	0	0	0	0	8
CEYPAACNALETLLIHR	2029.97	Q3TWN8	Aldh18a1	Delta-1-pyrroline-5-carboxylate synthase;Glutamate 5-kinase;Gamma-glutamyl phosphate reductase	3	4.65e-07	67.902	19161000	0	21984000	15784000	9160700	0	0	0	0	6
INALTAASEAACLIVSVDETIK	2288.19	Q8C5Q5	Cct7	T-complex protein 1 subunit eta	3	3.35e-07	55.302	7988800	0	0	0	9298900	0	0	0	0	2
TPAILEASAGAIQNLCAGR	1911.98	Q3TPD1	Ctnnd1	Catenin delta-1	3	0.057211	22.313	0	0	10607000	0	9357100	0	0	0	0	3
TSENGAVPVVSVMR	1444.73	Q9DAA6	Exosc1	Exosome complex component CSL4	2	0.0083198	57.019	0	0	14636000	13652000	9593800	0	0	0	0	3
ALFAGDIEEMVER	1478.71	B1ATP7	Elac2	Zinc phosphodiesterase ELAC protein 2	2	0.00065226	78.653	0	15731000	13073000	11716000	9641300	0	0	0	0	5
IEFPLPDR	985.523	Q8BKU2	Psmc4	26S protease regulatory subunit 6B	2	0.059608	55.531	0	9886300	0	0	9645700	0	0	0	0	2
QIEILELEDLEK	1470.78	Q9Z0W3	Nup160	Nuclear pore complex protein Nup160	2	2.53e-05	103.34	0	0	0	0	9676600	0	0	0	0	2
IEGCIIGFDEYMNLVLDDAEEIHSK	2909.35	E9Q4F4	Snrpe	Small nuclear ribonucleoprotein E	3	6.35e-07	64.028	0	0	7458200	0	9688400	0	0	0	0	2
VILSSSSSCLLPSK	1476.79	A7VMV2	Cryl1	Lambda-crystallin homolog	2	0.0015284	70.942	0	12456000	11880000	9317800	9758900	0	0	0	0	5
QQLQQAEEALVAK	1454.77	A3KG44	Ikbkg	NF-kappa-B essential modulator	2	4.65e-08	128.81	15202000	12503000	0	16778000	9773000	0	0	0	0	4
TLLVDGFYAAQQVLQK	1792.97	Q91ZE0	Tmlhe	Trimethyllysine dioxygenase, mitochondrial	3	0.00012918	73.887	17032000	16676000	11246000	10854000	9822800	0	0	0	0	6
LLEYMPLPPEEAENGENAGNEEPK	2669.22	O35841	Api5	Apoptosis inhibitor 5	3	0.032693	24.901	9242400	0	0	0	9870100	0	0	0	0	2
LDTITWTWQGPGALK	1685.88	Q3TFD2	Lpcat1	Lysophosphatidylcholine acyltransferase 1	2	0.0014412	80.763	0	0	12237000	11083000	9882900	0	0	0	0	2
ENPLLPEEEEQR	1481.7	F7CBP1	Eif4g2	Eukaryotic translation initiation factor 4 gamma 2	2	5.72e-08	101.38	0	0	0	0	9909800	0	0	0	0	3
NLDDTIDDEK	1176.51	Q91YZ8	Pabpc4;Gm10110	Polyadenylate-binding protein	2	0.0074094	70.929	12499000	0	0	0	9936900	0	0	0	0	2
TLTSDVANLANEK	1374.7	F8VPK5	Rock2	Rho-associated protein kinase;Rho-associated protein kinase 2	2	0.00065226	78.653	10437000	13011000	0	0	9986900	0	0	0	0	2
NLSQEIIELLK	1298.74	E9QK83	Utp20	Small subunit processome component 20 homolog	2	0.023664	55.567	0	0	0	0	10007000	0	0	0	0	3
NYNFGGEFVEAMIR	1645.76	Q3UYV9	Ncbp1	Nuclear cap-binding protein subunit 1	2	1.88e-05	103.08	11040000	9785000	0	0	10023000	0	0	0	0	3
GWEAFLNAPEASR	1446.69	Q8BGC0	Htatsf1	HIV Tat-specific factor 1 homolog	2	0.00036957	84.687	0	0	0	10962000	10035000	0	0	0	0	2
ENFIPTIVNFSAEEISDAIR	2264.13	Q9JHU4	Dync1h1	Cytoplasmic dynein 1 heavy chain 1	2;3	3.12e-13	91.725	23477000	0	0	0	10119000	0	0	0	0	3
GLVLVPTK	825.532	Q8BK66	Ddx56	Probable ATP-dependent RNA helicase DDX56	2	0.047452	58.782	0	0	11928000	0	10146000	0	0	0	0	2
MTLQLIK	845.504	Q91YU8	Ppan	Suppressor of SWI4 1 homolog	2	0.061998	60.358	0	9169900	0	0	10243000	0	0	0	0	2
ALDVQFLDSGNSTSVK	1679.84	A0A0A0MQD1	Tdrd7	Tudor domain-containing protein 7	2	0.00078272	65.179	0	0	0	0	10245000	0	0	0	0	2
VSVVPDEVATIASEVNSFSR	2105.06	Q8R123	Flad1	FAD synthase;Molybdenum cofactor biosynthesis protein-like region;FAD synthase region	3	2.75e-05	48.053	11470000	0	0	0	10249000	0	0	0	0	2
SGLGDDLVQALGLSK	1471.79	Q6P9Q4	Fhod1	FH1/FH2 domain-containing protein 1	2	9.99e-07	111.94	10310000	10988000	14783000	14670000	10249000	0	0	0	0	5
AQALAIETEAELER	1542.79	Q3THX5	Mvp	Major vault protein	2	0.00011843	90.653	0	8224000	0	0	10297000	0	0	0	0	2
QNYHQDAEAAINR	1528.7	P09528	Fth1	Ferritin heavy chain;Ferritin heavy chain, N-terminally processed	3	0.048582	27.969	0	0	0	0	10312000	0	0	0	0	2
CPTDELSLSNCAVVNEK	1934.87	P46460	Nsf	Vesicle-fusing ATPase	2	3.3e-07	100.19	0	11560000	0	0	10339000	0	0	0	0	2
LGVSCEVIDLR	1259.65	Q6P3A8	Bckdhb	2-oxoisovalerate dehydrogenase subunit beta, mitochondrial	2	0.0055018	67.334	22254000	14805000	15915000	20474000	10369000	0	0	0	0	4
GPSADGALGVSISAPGGAIASVPNWTLR	2620.36	Q3U4M7	Tpp2	Tripeptidyl-peptidase 2	2;3	0.0018211	33.307	6390300	8710300	15008000	0	10372000	0	0	0	0	4
RDLGEELEALK	1271.67	Q8VDD5	Myh9;Myh11	Myosin-9;Myosin-11	3	8.25e-05	95.018	0	0	0	14526000	10372000	0	0	0	0	2
SQSSMAPEEEQVANK	1633.73	O54941	Smarce1	SWI/SNF-related matrix-associated actin-dependent regulator of chromatin subfamily E member 1	2	0.0058049	57.401	13942000	0	0	18613000	10435000	0	0	0	0	4
NIIGMDKPLSLPGFLAK	1813.02	Q4FK28	Ada	Adenosine deaminase	2;3	0.0050553	83.204	11243000	21960000	36591000	19654000	10451000	0	0	0	0	8
FLGTAGTDVDLR	1263.65	Q6P9Q4	Fhod1	FH1/FH2 domain-containing protein 1	2	0.036065	53.597	0	0	0	0	10577000	0	0	0	0	2
APAVATVGSICDLNLK	1627.86	Q80X90	Flnb	Filamin-B	2	1.4e-05	93.839	0	0	0	14791000	10582000	0	0	0	0	2
DVDGLTSVSAGK	1147.57	Q3TW74	Mthfd1	C-1-tetrahydrofolate synthase, cytoplasmic;Methylenetetrahydrofolate dehydrogenase;Methenyltetrahydrofolate cyclohydrolase;Formyltetrahydrofolate synthetase;C-1-tetrahydrofolate synthase, cytoplasmic, N-terminally processed	2	0.00032182	85.958	18354000	22773000	0	0	10715000	0	0	0	0	4
MGEAIETTQQLYPSLLER	2078.04	E9Q5D6	Ranbp9	Ran-binding protein 9	2	0.0022188	52.555	0	0	0	15123000	10875000	0	0	0	0	2
GVEGYGNDQTYFEEIK	1847.82	Q62383	Supt6h	Transcription elongation factor SPT6	2	3.55e-05	86.911	0	0	0	0	10882000	0	0	0	0	5
LFGIESSSGTILWK	1536.82	Z4YJW0	Emc1	ER membrane protein complex subunit 1	2	0.00010016	109.42	11368000	0	0	0	10888000	0	0	0	0	3
FALITWIGEDVSGLQR	1803.95	Q544F6	Cotl1	Coactosin-like protein	2;3	0.00028139	48.899	10602000	0	0	0	10918000	0	0	0	0	2
LILADREEVEQEADNIFK	2131.08	Q8BG20	Dph5	Diphthine synthase	3	0.0014148	44.662	11940000	0	12579000	0	10993000	0	0	0	0	3
LLQTLPQLR	1080.67	A2AN08	Ubr4	E3 ubiquitin-protein ligase UBR4	2	0.0090297	75.692	0	0	13085000	11852000	11040000	0	0	0	0	3
YDLSGRPLNIK	1274.7	A2ATP6	Myef2	Myelin expression factor 2	3	0.066465	38.783	0	0	0	0	11049000	0	0	0	0	2
NPGYPQSEGLLGECMVR	1905.87	Q3U3C4	Sh3gl1	Endophilin-A2	2	3.93e-07	98.105	0	14453000	12877000	0	11140000	0	0	0	0	3
MVQQCCTYVEEITDLPVK	2212.02	Q3U8F5	Psmd12	26S proteasome non-ATPase regulatory subunit 12	2	2.63e-06	113.77	0	14936000	0	0	11221000	0	0	0	0	2
EPEPTDTTTYK	1280.58	Q8BK30	Ndufv3	NADH dehydrogenase [ubiquinone] flavoprotein 3, mitochondrial	2	0.0036874	72.607	14904000	12301000	0	0	11264000	0	0	0	0	4
HCNMVLENVK	1242.58	Q14AF6	Snrpd2;Gm5449	Small nuclear ribonucleoprotein Sm D2	2;3	0.0001291	121.6	0	0	26429000	44916000	11314000	0	0	0	0	4
ATVDDDASGWELGVPEK	1787.82	Q8K3H1	Naa35	N-alpha-acetyltransferase 35, NatC auxiliary subunit	2	0.00019433	71.241	0	0	0	8246500	11363000	0	0	0	0	3
PAPLLESPFK	1097.61	Q9Z1T1	Ap3b1	AP-3 complex subunit beta-1	2	0.0047118	76.221	12486000	12619000	0	0	11517000	0	0	0	0	2
WQYLLMAAEPYETIAFK	2073.03	Q7TN25	Sf3a2	Splicing factor 3A subunit 2	2	4.86e-07	95.018	0	9877600	0	0	11552000	0	0	0	0	3
DIKPQNLLLDPDTAVLK	1892.06	Q5KU03	Gsk3b	Glycogen synthase kinase-3 beta	3	0.032556	25.508	0	0	0	0	11680000	0	0	0	0	2
VFSIISSEK	1008.55	Q9DBY8	Nvl	Nuclear valosin-containing protein-like	2	0.029414	60.074	0	0	0	18080000	11688000	0	0	0	0	2
GVTIIGPATVGGIK	1281.77	Q3TED3	Acly	ATP-citrate synthase	2	0.0082163	69.979	0	0	9312800	0	11829000	0	0	0	0	2
TITSEDVAEMHNILK	1699.85	Q9CZS7	Pip4k2a	Phosphatidylinositol 5-phosphate 4-kinase type-2 alpha	2;3	7.32e-05	88.338	0	0	34522000	15127000	11855000	0	0	0	0	7
ESSLILAVTPANMDLANSDALK	2272.16	Q3T9X3	Dnm2	Dynamin-2	2	4.74e-05	85.457	13940000	11230000	8803500	0	11960000	0	0	0	0	4
ANDTTFGLAAGVFTR	1539.77	Q3TMT4	Aldh9a1	4-trimethylaminobutyraldehyde dehydrogenase	2	6.18e-05	89.959	21488000	0	0	0	11985000	0	0	0	0	5
IISLDPSDCLQPLSMQALPAQPESLCIVEMGGTEK	3826.85	B2RSV4	Sf3b3	Splicing factor 3B subunit 3	3	0.00019378	42.024	35893000	27518000	34262000	0	11987000	0	0	0	0	5
QAFQIGSPWR	1188.6	B2RTL5	Aldh1a7;Aldh1a1	Retinal dehydrogenase 1;Aldehyde dehydrogenase, cytosolic 1	2	0.0010427	94.692	14545000	0	0	0	12010000	0	0	0	0	5
LSGEAFDWLLGEIESK	1792.89	O08847	Polr2a	DNA-directed RNA polymerase;DNA-directed RNA polymerase II subunit RPB1	2	5.06e-05	82.069	0	14796000	0	0	12081000	0	0	0	0	2
EQYEQILAFVQGTVAEGAPIIPISAQLK	3012.62	Q3UIJ2	Eif2s3x;Eif2s3y	Eukaryotic translation initiation factor 2 subunit 3, X-linked;Eukaryotic translation initiation factor 2 subunit 3, Y-linked	3	0.00029877	45.357	17796000	0	0	0	12269000	0	0	0	0	2
IPVIENLGATLDQFDAIDFSDNEIR	2804.39	P57784	Snrpa1	U2 small nuclear ribonucleoprotein A	3	4.75e-05	54.259	13903000	13693000	11644000	11711000	12335000	0	0	0	0	6
AALSGANVLTLIEK	1398.81	Q91ZX7	Lrp1	Prolow-density lipoprotein receptor-related protein 1;Low-density lipoprotein receptor-related protein 1 85 kDa subunit;Low-density lipoprotein receptor-related protein 1 515 kDa subunit;Low-density lipoprotein receptor-related protein 1 intracellular domain	2	0.00098548	74.698	0	11543000	16163000	14859000	12394000	0	0	0	0	4
AAITVEHLAIK	1164.69	Q9JIK5	Ddx21	Nucleolar RNA helicase 2	2	0.028474	57.032	0	0	0	0	12398000	0	0	0	0	3
GDVDISGPK	886.44	E9Q616	Ahnak		2	0.0099277	74.486	0	21438000	34519000	17902000	12476000	0	0	0	0	5
NLDEQLSAPK	1113.57	Q6ZQ08	Cnot1	CCR4-NOT transcription complex subunit 1	2	0.039763	57.708	0	18953000	0	0	12734000	0	0	0	0	3
DRDNHCGLATAASYPVVN	1958.89	Q3UWH6	Ctsl	Cathepsin L1;Cathepsin L1 heavy chain;Cathepsin L1 light chain	2	0.013568	57.175	0	0	0	0	12997000	0	0	0	0	3
EADGSDSLEGFVLCHSIAGGTGSGLGSYLLER	3253.52	Q6F4J0	Tubg2;Tubg1	Tubulin gamma chain;Tubulin gamma-2 chain;Tubulin gamma-1 chain	3	0.00040488	40.545	11777000	17694000	12673000	19371000	13024000	0	0	0	0	7
LDFLEGDQKPVER	1544.78	Q9D903	Ebna1bp2	Probable rRNA-processing protein EBP2	2	1.04e-05	119.74	0	0	0	0	13039000	0	0	0	0	2
LAEGVQLLCLIDK	1470.81	G5E8J3	Wdr11	WD repeat-containing protein 11	2	0.012712	55.314	0	0	0	0	13161000	0	0	0	0	2
FELPAFDPR	1090.54	G5E8N7	Pnkp	Bifunctional polynucleotide phosphatase/kinase;Polynucleotide 3-phosphatase;Polynucleotide 5-hydroxyl-kinase	2	0.056921	51.854	0	17923000	15780000	0	13429000	0	0	0	0	3
SLGWDVLLAR	1128.63	P70268	Pkn1	Serine/threonine-protein kinase N1	2	0.0096048	66.621	0	0	15393000	0	13431000	0	0	0	0	2
LVEIVHPSQEEDR	1549.77	G5E8R4	Ppp6r3	Serine/threonine-protein phosphatase 6 regulatory subunit 3	3	0.049576	25.328	0	0	0	0	13581000	0	0	0	0	3
AAVPDAVGK	826.455	Q8VDN2	Atp1a3;Atp1a2;Atp1a1	Sodium/potassium-transporting ATPase subunit alpha-3;Sodium/potassium-transporting ATPase subunit alpha-2;Sodium/potassium-transporting ATPase subunit alpha-1	2	0.014473	68.383	0	0	15164000	0	13649000	0	0	0	0	2
LLAQLLGTSEEDSVVDTIYDK	2308.17	Q8R038	Myg1	UPF0160 protein MYG1, mitochondrial	2;3	3.78e-07	108.71	18186000	17520000	0	16653000	13822000	0	0	0	0	4
LVPELDTVVPLESSK	1624.89	A0PJE6	Pccb	Propionyl-CoA carboxylase beta chain, mitochondrial	2	1e-05	105.17	31749000	33816000	29210000	30098000	13880000	0	0	0	0	9
CPEALFQPSFLGMESCG	1928.81	Q6IWE2	Actb		2	0.017718	44.188	11795000	0	0	0	14067000	0	0	0	0	4
YSVLLPTYNER	1353.69	O70152	Dpm1	Dolichol-phosphate mannosyltransferase subunit 1	2	0.029498	64.191	17837000	0	0	0	14114000	0	0	0	0	2
DVTTFFSGK	1000.49	Q05DE0	Arfgap1	ADP-ribosylation factor GTPase-activating protein 1	2	0.023033	63.673	0	0	0	0	14260000	0	0	0	0	5
DPLVIELGQK	1110.63	Q9D1M7	Fkbp11	Peptidyl-prolyl cis-trans isomerase FKBP11	2	0.00034732	109.11	0	0	0	13317000	14284000	0	0	0	0	2
EDSVKPGAHLTVK	1379.74	E9Q7H5	Gm8991;Hnrnpa3;Gm6793;Gm9242;Gm17190	Heterogeneous nuclear ribonucleoprotein A3	3	0.026593	39.73	0	0	12296000	0	14319000	0	0	0	0	4
VLLCGPIGPK	1052.61	Q3UDS7	Adpgk	ADP-dependent glucokinase	2	0.046812	52.716	0	0	0	0	14590000	0	0	0	0	3
GPNIVGPYGILQPFADAMK	1987.02	Q3TNL9	mt-Nd1;ND1;Mtnd1	NADH-ubiquinone oxidoreductase chain 1	2	2.36e-10	109	0	35827000	32000000	29777000	14670000	0	0	0	0	4
LDIIDLVCLTGQHSTEK	1940.99	Q9JM90	Stap1	Signal-transducing adaptor protein 1	3	0.00011783	52.887	0	0	0	0	14712000	0	0	0	0	3
MFLYADNEDR	1272.54	Q9CR26	Vta1	Vacuolar protein sorting-associated protein VTA1 homolog	2	0.0097	66.435	20775000	0	17059000	0	14904000	0	0	0	0	3
ELVEFAQDDDRLR	1604.78	Q5SUH7	Clint1	Clathrin interactor 1	2	7.88e-05	132.39	9263700	0	19970000	0	14934000	0	0	0	0	3
AMITDPEVVFVASLTK	1719.91	A1ILG8	Vps13c	Vacuolar protein sorting-associated protein 13C	2	2.63e-05	103.75	24948000	22743000	24289000	19114000	14981000	0	0	0	0	6
LEVQELLK	970.57	Q9D5H9	Fam184a		2	0.00093387	95.352	0	0	0	0	15096000	0	0	0	0	2
YLDLHDCYLK	1338.63	Q58E59	Sf3a3	Splicing factor 3A subunit 3	2	0.0027154	82.645	0	0	0	0	15237000	0	0	0	0	2
QTQAAEELGEVTEGK	1588.76	Q8VBT6	Apobr	Apolipoprotein B receptor	2	1.57e-07	124.21	0	0	15821000	0	15345000	0	0	0	0	2
PIPDIGGGYIPTEEEWR	1927.93	Q9CRD0	Ociad1	OCIA domain-containing protein 1	2	0.00030802	83.314	33702000	0	0	23075000	15402000	0	0	0	0	4
SLMDEVVK	919.468	P09411	Pgk1	Phosphoglycerate kinase 1	1;2	0.000537	153.78	0	267080000	339450000	344630000	15428000	0	0	0	0	39
FCGVEAAVSEMTR	1455.65	Q99LS3	Psph	Phosphoserine phosphatase	2	4.24e-05	96.113	27759000	29747000	0	20347000	15495000	0	0	0	0	4
GGQLQEQLTQQLSQALSSAVAGR	2369.23	G5E896	Edc4	Enhancer of mRNA-decapping protein 4	3	5e-16	79.935	0	0	0	0	15517000	0	0	0	0	2
ILEVNGVNVEGATHK	1578.84	Q3UHD6	Snx27	Sorting nexin-27	3	0.0044744	34.485	14743000	0	18123000	0	15561000	0	0	0	0	4
YGVGFWR	883.434	Q99KI0	Aco2	Aconitate hydratase, mitochondrial	2	0.01573	94.669	0	0	13075000	0	15639000	0	0	0	0	3
GTGSVVGELMYK	1239.62	Q8BH59	Slc25a12	Calcium-binding mitochondrial carrier protein Aralar1	2	0.028666	58.37	0	0	0	0	15859000	0	0	0	0	2
SILSSLSGEELQTTR	1619.84	Q8VE88	Fam114a2	Protein FAM114A2	2;3	1.58e-08	107.09	0	0	0	0	15889000	0	0	0	0	4
FVGINASDINYSAGR	1582.77	Q14AZ9	Zadh2	Zinc-binding alcohol dehydrogenase domain-containing protein 2	2	3.89e-06	108.98	22695000	17559000	20344000	0	16031000	0	0	0	0	4
ILSNTPVIEDSTDFFK	1824.91	Q8K009	Aldh1l2	Mitochondrial 10-formyltetrahydrofolate dehydrogenase	2	0.0002359	75.78	27525000	0	0	0	16116000	0	0	0	0	2
IEDQIVK	843.47	F6RPJ9	Ide	Insulin-degrading enzyme	2	0.040625	68.312	15590000	17589000	25204000	0	16350000	0	0	0	0	4
VVEEPYTVR	1090.57	Q5SW19	Cluh	Clustered mitochondria protein homolog	2	0.0033371	91.318	0	0	0	0	16387000	0	0	0	0	2
IVLSLEPLEHPLISSPSFFSK	2339.28	J7I1C3	Rif1	Telomere-associated protein RIF1	3	0.0003959	47.75	0	0	0	0	16450000	0	0	0	0	2
NFVAFEVCR	1140.54	Q8BVK3	Uap1l1	UDP-N-acetylhexosamine pyrophosphorylase-like protein 1	2	0.028201	60.436	20543000	15406000	17954000	0	16537000	0	0	0	0	2
EDGTFPGLTGTLK	1334.67	P29452	Casp1	Caspase-1;Caspase-1 subunit p20;Caspase-1 subunit p10	2	0.0034993	64.439	0	0	23288000	20776000	16780000	0	0	0	0	4
TVQVVPHITDAIQEWVMR	2121.1	P70698	Ctps1;Ctps	CTP synthase 1	3	6.39e-08	98.035	16173000	0	21743000	0	16810000	0	0	0	0	5
NMSYQGFTK	1074.48	Q7TSZ3	Lars	Leucine--tRNA ligase, cytoplasmic	2	0.00097668	111.95	0	28344000	0	0	16885000	0	0	0	0	3
ELLESISPALLSYLQGHTQEVVLDK	2781.48	Q8BKS9	Kiaa0020	Pumilio domain-containing protein KIAA0020	3	1.4e-07	75.956	0	0	0	0	16981000	0	0	0	0	2
FAVVNVER	932.508	Q8R2M2	Dnttip2	Deoxynucleotidyltransferase terminal-interacting protein 2	2	0.028137	67.981	17688000	0	18532000	0	17058000	0	0	0	0	2
IVASASFDK	936.492	Q3URT5	Nle1	Notchless protein homolog 1	2	0.0070616	78.334	0	0	0	0	17065000	0	0	0	0	2
AVFPQNGLVVSSVDVQSVEPVDQR	2568.32	Q3THX5	Mvp	Major vault protein	3	0.0041187	25.407	0	0	0	13962000	17082000	0	0	0	0	3
EENTIILQQLLPLR	1678.96	Q3TB65	Nln	Neurolysin, mitochondrial	2	3.67e-07	123.01	16527000	17138000	0	0	17165000	0	0	0	0	2
NANSDVCAAALR	1260.59	Q9DBD5	Pelp1	Proline-, glutamic acid- and leucine-rich protein 1	2	3.39e-06	114.5	0	0	0	0	17185000	0	0	0	0	4
IVPDEIEEIKETLIDWCDEK	2473.19	A0JNY3	Gphn	Gephyrin;Molybdopterin adenylyltransferase;Molybdopterin molybdenumtransferase	3	8.86e-07	65.25	0	0	21580000	0	17314000	0	0	0	0	3
DDAVPNLIQLITNSVEMHAYTVQR	2726.37	Q8CBB7	Ap1g1	AP-1 complex subunit gamma-1	3	8.45e-07	66.3	32025000	16782000	0	0	17356000	0	0	0	0	3
SLHDALCVIR	1182.62	P80316	Cct5	T-complex protein 1 subunit epsilon	2	0.00079685	99.442	0	0	0	0	17568000	0	0	0	0	2
IAALQAFADQLIAVDHYAK	2057.09	B7ZWK3	Sptan1	Spectrin alpha chain, non-erythrocytic 1	3	2.91e-07	90.654	0	0	13996000	12474000	17575000	0	0	0	0	4
GAPGQPGTILR	1065.59	Q61191	Hcfc1	Host cell factor 1;HCF N-terminal chain 1;HCF N-terminal chain 2;HCF N-terminal chain 3;HCF N-terminal chain 4;HCF N-terminal chain 5;HCF N-terminal chain 6;HCF C-terminal chain 1;HCF C-terminal chain 2;HCF C-terminal chain 3;HCF C-terminal chain 4;HCF C-terminal chain 5;HCF C-terminal chain 6	2	0.0003654	95.358	0	20839000	0	0	17648000	0	0	0	0	2
YAVLYQPLFDK	1355.71	Q3TF41	Nap1l1	Nucleosome assembly protein 1-like 1	2	0.0052435	72.643	11054000	0	0	0	17652000	0	0	0	0	4
ELESVGIR	901.487	Q9QXB9	Drg2	Developmentally-regulated GTP-binding protein 2	2	0.012618	81.297	0	26836000	0	27245000	17690000	0	0	0	0	7
QLETIDQLHLEYAK	1699.88	Q3ULT2	Actn4	Alpha-actinin-4	2	2.11e-05	102.05	0	0	0	0	17715000	0	0	0	0	3
VIVTSESGVR	1045.58	Q3UDE2	Ttll12	Tubulin--tyrosine ligase-like protein 12	2	0.00060522	103.56	19033000	0	0	0	17745000	0	0	0	0	2
EFFNFLPLSSQDPAPIR	1977	A0PJE6	Pccb	Propionyl-CoA carboxylase beta chain, mitochondrial	2	1.01e-08	112.84	31059000	21498000	0	20265000	17891000	0	0	0	0	5
ALEATTEHIR	1139.59	Q80TM2	Tln1	Talin-1	2	2.03e-05	126.41	0	0	0	0	17987000	0	0	0	0	3
DLSAGAVSAVR	1044.56	Q8C0M9	Asrgl1	Isoaspartyl peptidase/L-asparaginase;Isoaspartyl peptidase/L-asparaginase alpha chain;Isoaspartyl peptidase/L-asparaginase beta chain	2	7.06e-05	93.111	0	0	0	0	18056000	0	0	0	0	11
SLAVSGLGVIGR	1127.67	Q64511	Top2b	DNA topoisomerase 2-beta;DNA topoisomerase 2	2	0.00046174	81.338	17970000	0	20807000	0	18191000	0	0	0	0	3
QLSQNTYTPR	1206.6	Q542D9	Tfrc	Transferrin receptor protein 1	2	2.74e-11	185.72	0	0	0	46357000	18322000	0	0	0	0	2
AQLGVQAFADALLIIPK	1767.03	Q52KG9	Cct6a	T-complex protein 1 subunit zeta	2	0.00023232	69.602	0	0	0	0	18341000	0	0	0	0	2
LDMSDLK	820.4	P13011	Scd2;Scd1;Scd3	Acyl-CoA desaturase 2;Acyl-CoA desaturase 1	2	0.045357	65.313	0	22860000	43544000	45096000	18366000	0	0	0	0	4
IITEGASILR	1071.63	B2RRX2	Ppp3ca	Serine/threonine-protein phosphatase;Serine/threonine-protein phosphatase 2B catalytic subunit alpha isoform	2	0.026701	57.859	0	0	21600000	0	18438000	0	0	0	0	2
YLNEYGAPDAGGLEHIPLGWSYWYALEK	3211.53	Q3UBB0	Gns	N-acetylglucosamine-6-sulfatase	3	0.022573	25.72	24296000	12795000	0	0	18502000	0	0	0	0	4
LCTDVTESEVAR	1378.64	Q3TET5	Pmpcb	Mitochondrial-processing peptidase subunit beta	2	1.27e-05	107.79	31002000	26991000	26780000	25367000	18554000	0	0	0	0	8
DVIAINQDPLGK	1281.69	Q8BGZ6	Gla	Alpha-galactosidase A	2	0.00027559	87.485	0	34370000	0	0	18705000	0	0	0	0	3
YIATPIFSK	1038.58	P10649	Gstm1	Glutathione S-transferase Mu 1	2	0.0017432	102.51	38279000	32473000	29199000	19782000	18797000	0	0	0	0	6
CIPGIFR	861.453	Q91ZX7	Lrp1	Prolow-density lipoprotein receptor-related protein 1;Low-density lipoprotein receptor-related protein 1 85 kDa subunit;Low-density lipoprotein receptor-related protein 1 515 kDa subunit;Low-density lipoprotein receptor-related protein 1 intracellular domain	2	0.055545	62.338	26070000	23629000	34388000	0	19095000	0	0	0	0	7
EQLDTFIDQLYK	1511.75	Q3TYX3	Smyd5	SET and MYND domain-containing protein 5	2	2.28e-05	104.22	0	20017000	0	0	19215000	0	0	0	0	2
GQEQWFR	949.441	P01897	H2-L;H2-D1;H-2D	H-2 class I histocompatibility antigen, L-D alpha chain;H-2 class I histocompatibility antigen, D-B alpha chain	2	8.63e-06	114.54	0	0	0	0	19566000	0	0	0	0	6
FLHQDIDSTR	1230.6	B9EKB8	Igf2r	Cation-independent mannose-6-phosphate receptor	3	0.0029052	55.046	0	0	19220000	14234000	19587000	0	0	0	0	2
VGLEPVSKWR	1169.66	E0CY72	Alkbh1	Alkylated DNA repair protein alkB homolog 1	2	0.0024988	112.17	20368000	27357000	15519000	22259000	19758000	0	0	0	0	8
GQVPPLVTTNFLVK	1511.87	Q3V222	Sec24c		2	0.016172	48.188	29066000	0	0	0	19805000	0	0	0	0	2
LVIGGAQESSSR	1202.63	B7ZND7	Ppp1r18	Phostensin	2	0.013897	57.348	0	0	21759000	0	19937000	0	0	0	0	2
YAIAVNDLGTEYVHR	1719.86	D3Z7P3	Gls	Glutaminase kidney isoform, mitochondrial	2;3	0.00055361	93.258	8537000	0	14208000	0	20030000	0	0	0	0	6
EQGYDVIAYLANIGQK	1780.9	Q3UJ34	Ass1;Gm5424	Argininosuccinate synthase	2	5.77e-05	101.71	0	0	0	0	20061000	0	0	0	0	3
VAAFDLDGTLITTR	1491.79	G5E8N7	Pnkp	Bifunctional polynucleotide phosphatase/kinase;Polynucleotide 3-phosphatase;Polynucleotide 5-hydroxyl-kinase	2	0.002234	86.114	0	21665000	0	0	20296000	0	0	0	0	2
ITGPDANVHLK	1163.63	E9Q616	Ahnak		2	0.0011363	83.456	25523000	36130000	46393000	0	20689000	0	0	0	0	5
IEPPLGWSFEPTNVELR	1983.01	Q6GQT9	Nomo1	Nodal modulator 1	2	9.49e-06	104.24	0	0	0	0	20839000	0	0	0	0	2
ELGSLPLPLSASEQR	1595.85	Q3TDG9	Stx12	Syntaxin-12	2	2.13e-06	110.08	0	23250000	0	0	21132000	0	0	0	0	2
MLLCEAVAAVMAK	1405.71	Q9D0I9	Rars	Arginine--tRNA ligase, cytoplasmic	2	0.0026544	68.657	0	0	0	26178000	21147000	0	0	0	0	2
SQQALLQGQLAEK	1412.76	Q9Z1Z0	Uso1	General vesicular transport factor p115	2	3.25e-05	99.752	23773000	18344000	0	0	21187000	0	0	0	0	3
ETETTLPIK	1030.55	P27546	Map4	Microtubule-associated protein 4	2	0.0038123	81.548	0	0	17566000	0	21217000	0	0	0	0	4
ELGLPVGTAAIAPIIAAVK	1803.09	B1ATP7	Elac2	Zinc phosphodiesterase ELAC protein 2	2	1.75e-06	84.892	0	27130000	0	0	21344000	0	0	0	0	2
TVINYDVAR	1049.55	Q810A7	Ddx42	ATP-dependent RNA helicase DDX42	2	0.0030521	92.439	0	22974000	0	0	21442000	0	0	0	0	2
NDIPSSYMALFPHLLQPVLWER	2625.34	Q9ERK4	Cse1l	Exportin-2	3	1.32e-10	98.132	0	0	30823000	0	21735000	0	0	0	0	5
WAESVPQEAPGLSNTSLIILHQLEDK	2874.48	Q8CDZ5	Nup133	Nuclear pore complex protein Nup133	3	2.98e-06	62.605	0	0	0	0	21815000	0	0	0	0	3
FKDPGLVDQLVK	1357.76	Q3U8N1	Sars	Serine--tRNA ligase, cytoplasmic	2;3	9.02e-05	76.073	17700000	0	21074000	0	21881000	0	0	0	0	5
IWLEALK	871.517	Q61635	Ifi47;Ifggb8;Ifggb9;Ifggb7;Ifggb10;Gm5431;Gm12185;9930111J21Rik2;9930111J21Rik1		2	0.021245	83.614	0	0	0	0	22366000	0	0	0	0	6
ISLESSQAEPVK	1286.67	E9PVX6	Mki67		2	8.32e-08	139.38	21382000	0	31170000	29553000	22541000	0	0	0	0	5
LEDLLQDAQDEK	1415.68	Q9QXS1	Plec	Plectin	2	2.15e-06	119.53	0	0	0	0	22947000	0	0	0	0	2
ALNLAYSSIYGSYR	1576.79	Q7TMB8	Cyfip1	Cytoplasmic FMR1-interacting protein 1	2	0.00022981	106.67	25008000	0	0	0	23024000	0	0	0	0	4
FWQAYPSAEDVLQK	1680.81	Q8C7R4	Uba6	Ubiquitin-like modifier-activating enzyme 6	2	2.12e-09	127.83	37138000	0	0	0	23499000	0	0	0	0	3
IWIFDGPAGEGR	1316.65	Q3TA68	Wdr36		2	0.00028575	87.149	0	24305000	0	0	23516000	0	0	0	0	2
LSSCDMCELAR	1340.55	A2AE27	Ampd2	AMP deaminase 2	2	1.96e-05	125.56	39637000	44383000	42448000	0	23768000	0	0	0	0	4
KEELTLEGIR	1186.66	Q4FZL1	Eif4a1	Eukaryotic initiation factor 4A-I	2	0.0003348	126.55	0	0	0	0	23991000	0	0	0	0	4
TYLDVEPITGFTLQFAK	1942.01	Q3U6Y9	Cd36	Platelet glycoprotein 4	2	1.08e-08	134.98	0	0	0	0	24488000	0	0	0	0	8
AGIVTSLQAR	1014.58	Q3UJN1	Mcm2	DNA helicase;DNA replication licensing factor MCM2	2	0.018289	60.892	0	0	0	0	24516000	0	0	0	0	4
VYLQNEYK	1055.53	Q6PB66	Lrpprc	Leucine-rich PPR motif-containing protein, mitochondrial	2	5.68e-12	142.64	0	0	0	0	24897000	0	0	0	0	4
MPSLEVSVPK	1085.58	E9Q616	Ahnak		2	0.010225	65.404	0	36866000	39491000	0	25060000	0	0	0	0	4
YTQGGLENLELSR	1478.74	Q6A0D1	Emc2	ER membrane protein complex subunit 2	2	1.13e-06	145.46	28333000	28663000	29892000	0	25500000	0	0	0	0	5
ATIAGGGVIPHIHK	1369.78	B2RVP5	H2afv;H2afz	Histone H2A;Histone H2A.V;Histone H2A.Z	2;3	6.29e-10	137.98	0	0	39203000	155980000	25509000	0	0	0	0	9
LFAAYNEGIINLLEK	1706.92	Q3TD51	Picalm	Phosphatidylinositol-binding clathrin assembly protein	2	9.57e-06	130.56	19891000	0	0	0	26431000	0	0	0	0	3
NATNVEQAFMTMAAEIK	1867.88	Q0PD66	Rab1b	Ras-related protein Rab-1B	2	1.61e-32	174.39	33046000	38818000	0	0	26555000	0	0	0	0	3
YMAEALLLR	1078.58	Q3TSX8	Tomm70a	Mitochondrial import receptor subunit TOM70	2	0.0070698	78.324	0	29525000	32600000	0	27029000	0	0	0	0	3
YPDLNLLR	1002.55	Q99388	Csprs	Component of Sp100-rs	2	0.0030334	124.37	0	0	0	0	27620000	0	0	0	0	2
LAQEALEAVPQNEIEVVSTSLPELYVVK	3067.63	A1A596	Pwp2	Periodic tryptophan protein 2 homolog	3;4	0.0015	35.376	0	0	0	0	27701000	0	0	0	0	2
LDSGQVGLYPANYVEAIQ	1935.96	Q3TDA7	Pacsin2	Protein kinase C and casein kinase substrate in neurons protein 2	2	0.0029982	66.989	0	30245000	32384000	38701000	28040000	0	0	0	0	5
ESIESEIRR	1117.57	Q01853	Vcp	Transitional endoplasmic reticulum ATPase	2	0.0019633	131.03	0	0	0	0	28041000	0	0	0	0	4
FGDLILK	804.475	Q99PV0	Prpf8	Pre-mRNA-processing-splicing factor 8	2	0.044583	65.803	0	0	34040000	0	28614000	0	0	0	0	2
ADIPVVICDTPQK	1454.74	Q3UKS0	Acsl5	Long-chain-fatty-acid--CoA ligase 5	2	0.00091148	77.358	29470000	0	0	0	28865000	0	0	0	0	4
EIAEAYDVLSDPR	1476.71	Q3TU79	Dnajb1	DnaJ homolog subfamily B member 1	2	0.0032866	65.5	0	0	0	0	29267000	0	0	0	0	2
MLQHIDYR	1074.53	Q3UN87	Snrpn;Snrpb	Small nuclear ribonucleoprotein-associated protein;Small nuclear ribonucleoprotein-associated protein B;Small nuclear ribonucleoprotein-associated protein N	2	0.00019062	116.25	0	0	54516000	0	29537000	0	0	0	0	7
VLGILAMIDEGETDWK	1788.9	Q8BTY3	Ppa1	Inorganic pyrophosphatase	2;3	4.19e-05	95.401	11864000	13664000	0	0	29593000	0	0	0	0	4
LLVDVDESTLSPEEQKER	2086.04	G5E866	Sf3b1	Splicing factor 3B subunit 1	3	4.46e-08	106.16	0	0	0	74923000	29636000	0	0	0	0	3
VGFVGISNWALDPAK	1572.83	F7A6H4	Rnf213	E3 ubiquitin-protein ligase RNF213	2	7.16e-05	111.63	0	0	0	0	29830000	0	0	0	0	3
STNVAVDSGGGLLKPTVASQNQSLPVAK	2737.46	Q3TD51	Picalm		3	3.63e-08	53.751	0	0	35942000	53749000	30006000	0	0	0	0	5
LVLDSIIWAFK	1303.75	Q6P5F9	Xpo1	Exportin-1	2	6.29e-05	116.52	24828000	0	16128000	0	30108000	0	0	0	0	4
DGTYAVTYIPDK	1341.65	Q80X90	Flnb	Filamin-B	2	0.00048644	93.058	31605000	32157000	0	44830000	31283000	0	0	0	0	7
TSACGLFSVCYPR	1516.68	Q76MZ3	Ppp2r1a;Ppp2r1b	Serine/threonine-protein phosphatase 2A 65 kDa regulatory subunit A alpha isoform;Serine/threonine-protein phosphatase 2A 65 kDa regulatory subunit A beta isoform	2	1.42e-05	106.4	0	30450000	42515000	33399000	31467000	0	0	0	0	2
STIGVDGSVYK	1124.57	E9Q5B5	Hk2	Hexokinase;Hexokinase-2	2	0.0012386	81.915	0	36159000	37728000	0	31867000	0	0	0	0	5
QWLIDTLYAFNSGAVDR	1967.97	B2RT97	Psmd13	26S proteasome non-ATPase regulatory subunit 13	2;3	3.41e-12	132.79	0	0	0	0	32758000	0	0	0	0	3
DFEPYLEILESYSTK	1832.87	Q4FK38	Sgpl1	Sphingosine-1-phosphate lyase 1	2	0.0092493	55.261	0	66351000	0	32013000	33291000	0	0	0	0	3
LDFSTGNFNVLAVR	1551.8	Q9CVJ6	Tram1	Translocating chain-associated membrane protein;Translocating chain-associated membrane protein 1	2;3	4.28e-18	169.93	0	0	0	0	33450000	0	0	0	0	2
LGSTEATIEER	1204.59	Q68FC6	Wdr43	WD repeat-containing protein 43	2	0.00025237	84.17	0	0	0	49102000	33503000	0	0	0	0	5
WQAVLAQTDVR	1285.68	Q9QXS1	Plec	Plectin	2	0.0029466	85.377	0	0	0	0	33520000	0	0	0	0	2
IWQYVYSK	1085.55	P61164	Actr1a;Actr1b	Alpha-centractin;Beta-centractin	1;2	0.026943	121.09	42746000	30646000	34835000	40656000	33818000	0	0	0	0	5
TEAENTITYSLLK	1481.76	P08101	Fcgr2;Fcgr2b	Low affinity immunoglobulin gamma Fc region receptor II	2	2.17e-08	113.47	0	0	0	0	33903000	0	0	0	0	11
SLLLSVNAR	971.576	Q8BHN3	Ganab	Neutral alpha-glucosidase AB	2	0.012625	70.919	0	0	0	0	34019000	0	0	0	0	2
QLKPPAELYPEDINTFK	2002.04	Q8CAQ8	Immt	MICOS complex subunit Mic60	3	0.00010084	43.286	0	0	0	33155000	34225000	0	0	0	0	3
MIAILTENYGGK	1308.67	Q9D0R2	Tars	Threonine--tRNA ligase, cytoplasmic	2	4.37e-05	96.89	0	27977000	0	0	34259000	0	0	0	0	3
LFFVGSR	824.454	Q3UG45	Slc7a5;Slc7a6	Large neutral amino acids transporter small subunit 1;Y+L amino acid transporter 2	2	0.0068274	127.66	34357000	34936000	31418000	0	34287000	0	0	0	0	4
LDYFLLSHSLLPALCDSK	2091.07	Q544Z7	Apex1	DNA-(apurinic or apyrimidinic site) lyase;DNA-(apurinic or apyrimidinic site) lyase, mitochondrial	2;3	6.62e-45	204.94	145420000	117500000	169420000	128990000	34938000	0	0	0	0	18
QPSQGPTFGVK	1144.59	Q3V3R1	Mthfd1l	Monofunctional C1-tetrahydrofolate synthase, mitochondrial	2	0.033937	56.916	39515000	45840000	0	0	35907000	0	0	0	0	2
ADTNLGNILLNVLIAPNMPCTR	2409.25	Q9JIH2	Nup50	Nuclear pore complex protein Nup50	2;3	0.00035306	56.599	21939000	0	19226000	26321000	35926000	0	0	0	0	7
RGPCIIYNEDNGIIK	1760.89	Q564E8	Rpl4	60S ribosomal protein L4	2;3	0.00072005	80.69	0	0	0	0	36346000	0	0	0	0	4
ELEQIFCQFDSK	1542.7	Q60597	Ogdh	2-oxoglutarate dehydrogenase, mitochondrial	2	3.11e-14	171.5	63710000	48090000	46978000	45153000	37168000	0	0	0	0	4
VQVVVPEAETR	1225.67	Q6GQT9	Nomo1	Nodal modulator 1	2	0.0012471	99.013	0	0	0	0	37486000	0	0	0	0	3
TPASPVVHIR	1075.61	Q3UMT7	Hnrnpl	Heterogeneous nuclear ribonucleoprotein L	2	8.46e-05	124.98	0	29040000	38203000	39347000	37602000	0	0	0	0	5
VTQLLER	857.497	Q9QXS1	Plec	Plectin	2	0.012529	105.39	0	0	0	45966000	37696000	0	0	0	0	3
GDTPASAAGDTLSVPAPAVQHEDTIK	2547.25	Q3U7N2	Immt		3	0.0030566	31.978	0	0	50828000	0	38619000	0	0	0	0	4
VVLGTSNFK	963.539	Q542D9	Tfrc	Transferrin receptor protein 1	2	0.00024826	136.16	0	47260000	54562000	81449000	39428000	0	0	0	0	6
PFGVALLFGGVDEK	1447.77	Q3UPK6	Psma5	Proteasome subunit alpha type;Proteasome subunit alpha type-5	2	3.32e-05	96.64	0	0	0	0	41002000	0	0	0	0	2
STQAAPQVVLNVPETQVTCLENGLR	2723.39	Q3TET5	Pmpcb	Mitochondrial-processing peptidase subunit beta	2;3	3.96e-09	82.627	0	59960000	0	0	41078000	0	0	0	0	6
TTDFSDFLSIVGCTK	1689.79	Q9D1P4	Chordc1	Cysteine and histidine-rich domain-containing protein 1	2;3	2.73e-08	126.1	3587500	5131600	0	0	41259000	0	0	0	0	6
LSTLCPSAVLQR	1343.72	Q6ZQ38	Cand1	Cullin-associated NEDD8-dissociated protein 1	2	4.88e-05	105.2	50138000	0	65225000	0	41647000	0	0	0	0	3
VLFGEITR	933.528	Q91WD5	Ndufs2	NADH dehydrogenase [ubiquinone] iron-sulfur protein 2, mitochondrial	2	0.017092	75.761	47468000	0	38375000	0	41762000	0	0	0	0	3
GGAVVDEGPTGIK	1198.62	Q3UDP9	Slc16a3	Monocarboxylate transporter 4	2	0.0019446	72.2	0	0	0	0	42460000	0	0	0	0	2
ENLENWLNYLNK	1548.76	Q3TK27	Gnl3	Guanine nucleotide-binding protein-like 3	2	4.5e-10	154.85	64952000	0	56258000	0	42859000	0	0	0	0	4
GLSLVLSEGGLR	1199.69	K3W4P2	Ints1;KIAA1440	Integrator complex subunit 1	2	0.042764	46.001	0	0	0	0	43236000	0	0	0	0	2
TEPVETVLK	1014.56	Q14AZ9	Zadh2	Zinc-binding alcohol dehydrogenase domain-containing protein 2	2	0.061096	50.607	0	34357000	0	0	43414000	0	0	0	0	2
AAEGGALADEVR	1157.57	Q8R0Z6	Angptl6	Angiopoietin-related protein 6	2	0.0029067	69.423	0	0	0	0	43622000	0	0	0	0	2
IAQITGPPDR	1066.58	Q0P6B2	Fubp1	Far upstream element-binding protein 1	2	0.00095532	96.034	0	52040000	0	0	43746000	0	0	0	0	4
LFQQIYSDGSDEVK	1627.77	Q9CX34	Sugt1	Suppressor of G2 allele of SKP1 homolog	2	1.76e-05	103.63	0	53279000	0	0	44260000	0	0	0	0	4
SLGDDISSETSGDFR	1584.69	Q8C1X9	Anxa3	Annexin;Annexin A3	2	1.88e-21	197.31	54603000	0	58317000	39614000	44499000	0	0	0	0	4
YTEGVQSLNWTK	1424.69	G3X956	Supt16;Supt16h	FACT complex subunit SPT16	2	6.59e-25	195.36	60750000	52260000	61526000	60426000	44700000	0	0	0	0	8
EIGNLLHPSVPISNDEDADNKVER	2660.3	Q3U8N1	Sars	Serine--tRNA ligase, cytoplasmic	4	2.1e-09	74.561	33648000	0	0	0	44847000	0	0	0	0	3
LTVNEAVK	872.497	Q9QXS1	Plec	Plectin	2	0.014343	78.377	0	37827000	0	0	45383000	0	0	0	0	2
EDLVFIFWAPENAPLK	1887.98	Q544Y7	Cfl1	Cofilin-1	2	1.97e-29	174.42	0	0	0	0	45838000	0	0	0	0	2
LPDGHEFK	941.461	P16045	Lgals1	Galectin-1	2	0.0059856	101.33	0	20851000	56042000	0	46474000	0	0	0	0	3
VVQVSAGDSHTAALTEDGR	1911.93	Q3U6D2	Rcc1	Regulator of chromosome condensation	3	1.04e-06	59.281	0	0	0	0	46905000	0	0	0	0	2
IVEFLQSFDEITAMTGDGVNDAPALK	2780.36	Q5DTI2	Atp2a2	Sarcoplasmic/endoplasmic reticulum calcium ATPase 2;Calcium-transporting ATPase	2;3	4.58e-13	97.542	17235000	0	0	0	46973000	0	0	0	0	2
LFELLEK	890.511	Q91ZW3	Smarca5;Smarca1	SWI/SNF-related matrix-associated actin-dependent regulator of chromatin subfamily A member 5;Probable global transcription activator SNF2L1	2	0.021716	82.671	0	0	0	0	47757000	0	0	0	0	2
EVMIVGVGEK	1059.56	Q8C2Q8	Atp5c1	ATP synthase subunit gamma;ATP synthase subunit gamma, mitochondrial	2	0.0060618	73.573	0	46859000	0	0	47826000	0	0	0	0	3
AYTEEDLDLVEK	1423.67	Q3TW74	Mthfd1	C-1-tetrahydrofolate synthase, cytoplasmic;Methylenetetrahydrofolate dehydrogenase;Methenyltetrahydrofolate cyclohydrolase;Formyltetrahydrofolate synthetase;C-1-tetrahydrofolate synthase, cytoplasmic, N-terminally processed	2	2.44e-26	147.95	0	0	66002000	0	48766000	0	0	0	0	10
EAESLIAK	859.465	Q542X7	Cct2	T-complex protein 1 subunit beta	2	0.0087292	90.777	47881000	0	72637000	49039000	50295000	0	0	0	0	4
ANSVWGALR	972.514	Q3TXR9	Hexb	Beta-hexosaminidase;Beta-hexosaminidase subunit beta	2	0.0089953	75.738	0	0	0	0	53509000	0	0	0	0	3
ALLTLADGR	928.534	Q8C1X9	Anxa3	Annexin;Annexin A3	2	0.0043707	87.251	0	41433000	0	0	54439000	0	0	0	0	5
FFYSDQNVDSR	1376.6	Q80TM2	Tln1;Tln2	Talin-1;Talin-2	2	4.36e-08	153.24	71840000	62036000	0	0	56625000	0	0	0	0	3
ILIATDVASR	1057.61	Q4FZF3	Ddx49	Probable ATP-dependent RNA helicase DDX49	2	0.013701	62.546	0	33267000	44922000	0	59625000	0	0	0	0	5
DGIVLGADTR	1015.53	Q5D098	Psmb7	Proteasome subunit beta type;Proteasome subunit beta type-7	2	0.0025574	83.783	86242000	101720000	77588000	0	60202000	0	0	0	0	4
INEEISVK	930.502	Q8VDM6	Hnrnpul1	Heterogeneous nuclear ribonucleoprotein U-like protein 1	2	0.0037521	89.401	0	0	0	0	64995000	0	0	0	0	3
GNFTLPEVAECFDEITYVELQK	2601.23	Q8C290	Hnrnpu;Gm28062	Heterogeneous nuclear ribonucleoprotein U	3	0.0029391	41.491	64481000	0	0	0	65707000	0	0	0	0	3
VAQPSITDNK	1071.56	B9EKP5	Flna	Filamin-A	1;2	1.06e-08	117.89	0	39523000	0	42514000	68903000	0	0	0	0	16
AEGPDVAVDLPK	1209.62	E9Q616	Ahnak		2	2.57e-05	103.22	143360000	0	145070000	0	69121000	0	0	0	0	3
VFDPVPDGVTK	1172.61	E9QNN1	Dhx9	ATP-dependent RNA helicase A	2	0.00080862	88.392	0	90830000	108070000	0	69807000	0	0	0	0	3
LEQELFSGGNTGINFEK	1881.91	B9EKE9	Ddx3x;D1Pas1;Ddx3y	ATP-dependent RNA helicase DDX3X;Putative ATP-dependent RNA helicase Pl10;ATP-dependent RNA helicase DDX3Y	2	9.98e-06	112.82	0	0	0	0	71576000	0	0	0	0	2
VLWVTLTGTK	1116.65	Q08EC2	Hk3	Hexokinase;Hexokinase-3	2	0.0022946	85.676	0	0	129230000	0	73979000	0	0	0	0	6
VEGPAFTDAIR	1174.6	Q8R1F1	Fam129b	Niban-like protein 1	2	0.00031731	98.048	0	83254000	0	126550000	74718000	0	0	0	0	2
PGITFEIGAR	1059.57	Q6P7V2	Phf20l1	PHD finger protein 20-like protein 1	2	0.00074992	100.45	37630000	0	0	0	93091000	0	0	0	0	3
FVIKPIDK	958.585	Q3TZQ2	Msn;Rdx;Ezr	Moesin;Radixin;Ezrin	1;2	0.027556	111.01	0	7495900	0	0	93675000	0	0	0	0	4
NEVALLER	942.513	Q3UKQ5	M6pr	Cation-dependent mannose-6-phosphate receptor	2	0.00096281	141.93	0	0	0	0	93731000	0	0	0	0	4
VPGTLLPR	851.523	Q8C4Q6	Aida	Axin interactor, dorsalization-associated protein	2	0.063367	54.525	118060000	110300000	0	101860000	103490000	0	0	0	0	4
DLPVSEQQER	1199.58	B2RT97	Psmd13	26S proteasome non-ATPase regulatory subunit 13	2	9.14e-29	166.52	132200000	0	135560000	0	104670000	0	0	0	0	24
AAILQTEVDALR	1298.72	V9GWT6	Erc1;Erc2	ELKS/Rab6-interacting/CAST family member 1;ERC protein 2	2	0.036379	55.084	0	0	0	0	105380000	0	0	0	0	3
VDAECMPVVR	1174.55	Q07797	Lgals3bp	Galectin-3-binding protein	2	4.38e-40	190.51	0	0	0	0	118670000	0	0	0	0	4
VYGLYSVTNSR	1257.64	Q3UCJ0	Ptpn6	Tyrosine-protein phosphatase non-receptor type;Tyrosine-protein phosphatase non-receptor type 6	2	5.24e-05	118.71	0	0	151220000	146800000	121420000	0	0	0	0	3
NMLFSGTNIAAGK	1322.67	Q5DTI2	Atp2a2;Atp2a1	Sarcoplasmic/endoplasmic reticulum calcium ATPase 2;Calcium-transporting ATPase;Sarcoplasmic/endoplasmic reticulum calcium ATPase 1	2	9.51e-07	120.45	101550000	112400000	104990000	137120000	131870000	0	0	0	0	7
FGPLASVK	817.47	Q6NV83	U2surp	U2 snRNP-associated SURP motif-containing protein	2	0.047328	58.815	123340000	132880000	142050000	0	148200000	0	0	0	0	9
KELGAMNSEELLSLPLKECFK	2435.24	Q0VAW0	Morc2b	MORC family CW-type zinc finger protein 2B	3	0.014601	29.766	0	141980000	0	0	160660000	0	0	0	0	2
YAICSALAASALPALVMSK	1936.02	Q564E8	Rpl4	60S ribosomal protein L4	2;3	2.07e-09	126.71	18834000	12086000	14223000	16960000	175740000	0	0	0	0	9
IVLLDSSLEYK	1278.71	Q3U4U6	Cct3	T-complex protein 1 subunit gamma	2;3	1.24e-05	129.38	0	0	0	0	291720000	0	0	0	0	6
QEVVLNYESLR	1348.7	E0CYI9	Gcc2	GRIP and coiled-coil domain-containing protein 2	2	0.010602	61.679	436890000	0	530650000	0	306270000	0	0	0	0	4
EQLQALIPYVLNPSK	1711.95	E9PYT3	Atl3	Atlastin-3	2	5.37e-38	202.29	0	0	494460000	473830000	320470000	0	0	0	0	9
VTLELGGK	815.475	Q544B1	Aldh2;Aldh1a2;Aldh1a3;Aldh1a7;Aldh1a1	Aldehyde dehydrogenase, mitochondrial;Retinal dehydrogenase 2;Aldehyde dehydrogenase;Aldehyde dehydrogenase family 1 member A3;Retinal dehydrogenase 1;Aldehyde dehydrogenase, cytosolic 1	2	0.006455	98.418	430600000	0	438030000	0	392540000	0	0	0	0	5
YGISDECKSDKVVIQDPYR	2271.08	E9Q8N1	Ttn	Titin	3	0.048337	25.824	0	612110000	0	943110000	1519700000	0	0	0	0	7
TLYGFGG	713.338	B2RTM0	Hist2h4;Hist1h4a	Histone H4	1	0.013293	162.44	0	0	6764900000	0	4009000000	0	0	0	0	2
NLIDYFIPFLPLEYK	1884.01	Q9ER41	Tor1b	Torsin-1B	2	0.031423	44.188	0	0	0	0	0	2211300	0	0	0	2
VPPPWLIAMQR	1306.72	Q3UJB0	Sf3b2		3	0.0043516	60.518	3062200	0	0	4981700	0	2305700	0	0	0	2
LDAEEVSR	917.445	Q6IQY0	Fdxr	NADPH:adrenodoxin oxidoreductase, mitochondrial	2	0.02991	63.565	2537200	0	0	0	2737800	2353400	0	0	0	4
MQDIPEETESR	1333.58	H3BJU7	Arhgef2	Rho guanine nucleotide exchange factor 2	2	0.00013739	89.827	0	2135000	0	0	0	2420300	0	0	0	4
PLLGLILLNEK	1221.77	E9PUW7	Xpo7;Ranbp17	Exportin-7;Ran-binding protein 17	2	0.0019428	77.677	5046100	4586900	3824400	0	4523300	2605300	0	0	0	5
VLAQESQDVSGSR	1374.67	Q4FJM2	Cdkn1b	Cyclin-dependent kinase inhibitor 1B	2	6.66e-05	94.297	6616600	5789200	0	0	0	2854500	0	0	0	2
HESQVDSVVK	1126.56	Q9CQG4	Reep5	Receptor expression-enhancing protein;Receptor expression-enhancing protein 5	2	0.0036349	78.334	0	0	0	1997000	0	3059600	0	0	0	4
VLLLLWK	883.59	Q3UGC1	Strip1;Strip2	Striatin-interacting protein 1;Striatin-interacting proteins 2	2	0.042705	66.994	3157500	0	4895300	0	3374200	3079800	0	0	0	7
MLIPYIEHWPR	1453.75	F6SFF5	Coq9	Ubiquinone biosynthesis protein COQ9, mitochondrial	3	0.0017815	59.542	0	0	0	0	4369900	3151100	0	0	0	4
DYGVLLESAGIALR	1475.8	P20108	Prdx3	Thioredoxin-dependent peroxide reductase, mitochondrial	3	0.0056632	49.929	4398900	3172000	1873600	1752100	0	3368800	0	0	0	5
VLAGAVIGDGQSAVASNIANTTYR	2347.21	A2AH22	Ambra1	Activating molecule in BECN1-regulated autophagy protein 1	3	0.00054415	34.405	0	0	0	0	0	3482200	0	0	0	2
LLFTLAR	832.517	Q91WL8	Wwox	WW domain-containing oxidoreductase	2	0.029584	75.311	0	0	0	0	2801600	3604100	0	0	0	2
LSLFLNPR	958.56	Q3UDG9	Myd88	Myeloid differentiation primary response protein MyD88	2	0.018538	72.138	0	2875300	4054200	0	0	3825600	0	0	0	4
FLFPEYVPER	1295.65	Q9JJG9	Noa1	Nitric oxide-associated protein 1	2	0.0012768	90.657	4191100	7342500	4738500	0	4071900	3827800	0	0	0	7
VSFASTDEQDAMDGELVCR	2128.9	E9PUW7	Xpo7	Exportin-7	2	1.65e-05	97.551	6802400	7986100	6585300	6481700	0	3835700	0	0	0	5
ERLELCDNR	1203.57	P99028	Uqcrh	Cytochrome b-c1 complex subunit 6, mitochondrial	3	0.0088036	55.249	0	0	5379000	0	4446100	3853900	0	0	0	3
LLGLAELLR	996.633	Q6PGH6	Nbas		2	0.022971	61.999	2063100	1872100	2597900	3557100	3382000	3860500	0	0	0	7
TLAFLVPVLEALYR	1603.93	Q66JW6	Ddx10	Probable ATP-dependent RNA helicase DDX10	2;3	0.0076222	74.841	0	0	6571600	0	0	3877500	0	0	0	6
DSELSDSDSGYGVGHSESDK	2069.83	Q8VDF2	Uhrf1	E3 ubiquitin-protein ligase UHRF1	3	0.013149	31.358	0	0	0	6723800	0	3938000	0	0	0	2
NLDLFVVR	974.555	Q9D270	Zdhhc21	Probable palmitoyltransferase ZDHHC21	2	0.015081	77.674	0	0	4232200	0	0	3949900	0	0	0	2
FLSLFLK	866.527	Q6A009	Ltn1	E3 ubiquitin-protein ligase listerin	2	0.021245	83.614	0	0	3310600	0	4588200	3995300	0	0	0	4
NEWMQALQQAVVEHR	1837.89	Q4LDD4	Arap1	Arf-GAP with Rho-GAP domain, ANK repeat and PH domain-containing protein 1	3	0.023783	29.733	0	0	0	0	0	4001700	0	0	0	3
SAVDYNTCAGVWSQDK	1799.78	Q3UNH5	Ythdf2	YTH domain-containing family protein 2	2	0.00054109	69.864	0	0	8346700	0	0	4065600	0	0	0	2
YQIHIPLPPK	1204.7	P46471	Psmc2	26S protease regulatory subunit 7	3	0.049508	33.225	0	0	0	0	4025500	4083300	0	0	0	4
FMPAGLIAGASLLMVAK	1688.94	Q8C297	Tmem14c	Transmembrane protein 14C	3	0.00025525	45.723	0	0	0	0	4434600	4141300	0	0	0	3
YIFTMLSSLAR	1300.68	Q64511	Top2b	DNA topoisomerase 2-beta	2	0.021536	56.563	4234200	0	3747600	0	0	4157900	0	0	0	4
IPAGLCATAIDILTTVVR	1883.06	E9QKZ2	Ipo9	Importin-9	3	0.041849	26.837	7354900	0	0	0	5412600	4158000	0	0	0	3
QTVVPPPMCTYR	1447.7	Q7TT37	Ikbkap	Elongator complex protein 1	2	0.010645	59.426	0	4554300	0	5814500	0	4170400	0	0	0	2
FVQSTQNNGTLK	1335.68	F1AHI9	Dock10	Dedicator of cytokinesis protein 10	2	0.033049	47.187	0	0	0	0	3811000	4194400	0	0	0	2
PGSDTIKPDVNK	1269.66	P35700	Prdx1	Peroxiredoxin-1	3	0.057776	29.544	0	0	0	0	0	4258400	0	0	0	2
IQLPIIQLR	1092.7	Q3UDK0	Chuk	Inhibitor of nuclear factor kappa-B kinase subunit alpha	2	0.017173	64.757	0	0	0	0	0	4279600	0	0	0	2
LAIQEALSMMVGAYSTLEGAQR	2338.17	Q6PDI5	Ecm29;AI314180	Proteasome-associated protein ECM29 homolog	3	0.0024589	42.612	0	7524600	6068400	0	3148400	4296300	0	0	0	4
GALLPLSLR	938.591	Q9D4H1	Exoc2	Exocyst complex component 2	2	0.018061	63.565	4241100	0	0	3946000	0	4302900	0	0	0	4
LQYEGIFIK	1109.61	Q8K4Z5	Sf3a1	Splicing factor 3A subunit 1	1;2	0.0018481	101.33	0	0	59221000	0	57737000	4305400	0	0	0	2
PFQPLLVVAPTQLR	1577.93	B1ATP7	Elac2	Zinc phosphodiesterase ELAC protein 2	3	0.047262	31.389	0	0	0	0	2972400	4380200	0	0	0	2
CTLCSQPGATIGCEIK	1793.81	E9QAG2	Phf6	PHD finger protein 6	2	4.75e-05	83.045	6629600	7620400	0	9753600	0	4424600	0	0	0	5
EDAGDDDDKEGAIGVR	1660.72	Q4VBG1	Ddx47	Probable ATP-dependent RNA helicase DDX47	3	0.0042883	37.555	6000900	4092300	0	0	0	4447100	0	0	0	4
NITLSLVANPSHLEAADPVVMGK	2375.25	Q60597	Ogdh	2-oxoglutarate dehydrogenase, mitochondrial	2	0.00016087	58.831	0	0	0	0	4094100	4528400	0	0	0	2
PFSVEFFR	1027.51	Q8VCY6	Utp6	U3 small nucleolar RNA-associated protein 6 homolog	2	0.026266	75.854	5527600	5119100	4814800	0	5047300	4546500	0	0	0	3
VSQLLVDGVCTVANCVGK	1917.97	D3Z3F8	Spg20	Spartin	2	9.27e-07	92.925	7769700	0	6613700	5576400	0	4576900	0	0	0	7
LQKPADPVAASR	1251.69	Q6PAI8	Zc3h4	Zinc finger CCCH domain-containing protein 4	3	0.015564	49.423	0	0	6444500	5220900	4881800	4594700	0	0	0	6
LFPACHDSDESDSGK	1663.68	O88508	Dnmt3a	DNA (cytosine-5)-methyltransferase 3A	3	0.03501	33.265	0	4796500	8206500	0	0	4637200	0	0	0	3
AEENNSGVESSGYGSPGPTWDR	2294.97	A0A087WPL5	Dhx9	ATP-dependent RNA helicase A	2	0.0002816	58.21	0	0	5069600	5514300	0	4637300	0	0	0	6
DVYDYFR	976.429	Q541Z2	Fnta	Protein farnesyltransferase/geranylgeranyltransferase type-1 subunit alpha	2	0.083845	55.441	0	6438200	0	6108400	0	4645900	0	0	0	3
VLDANNCDYEQR	1495.64	Q03141	Mark3	MAP/microtubule affinity-regulating kinase 3	2	4.23e-06	111.06	6427200	5498200	8211400	6229500	3315800	4680500	0	0	0	6
AMSLVSGEGEGEQNEIR	1804.83	P70227	Itpr3	Inositol 1,4,5-trisphosphate receptor type 3	2	0.001441	59.57	0	4957800	5965900	0	0	4681900	0	0	0	4
IINADSEDPK	1100.54	P46471	Psmc2	26S protease regulatory subunit 7	2	0.0039419	77.732	0	0	0	0	0	4684000	0	0	0	2
IGMAIPAMAIPPVIMNTLEK	2109.14	Q91V61	Sfxn3	Sideroflexin-3	3	0.002096	29.172	0	5642000	6355900	0	0	4699400	0	0	0	3
ALVLELCCNDESGEDVEVPYVR	2565.17	B9EHN0	Uba1	Ubiquitin-like modifier-activating enzyme 1	2	4.09e-07	88.087	0	0	6252500	0	7112000	4707100	0	0	0	3
LDDDSPYSGPFCGR	1584.65	D3Z0Y1	Samsn1	SAM domain-containing protein SAMSN-1	2	0.0015232	70.977	0	0	0	0	5145700	4718400	0	0	0	2
LAAVAAINAAIQK	1252.75	Q9JKF1	Iqgap1	Ras GTPase-activating-like protein IQGAP1	2;3	1.32e-05	84.507	0	0	14459000	0	33952000	4747300	0	0	0	4
GPGGSSLLIEALSNSGPK	1682.88	Q8K0Z7	Taco1	Translational activator of cytochrome c oxidase 1	3	0.014789	25.508	7018500	7048800	7348300	4943500	6510700	4774100	0	0	0	9
EENAQQILNTAIPFR	1742.9	O35450	Fkbpl	FK506-binding protein-like	2	0.00028171	77.64	5956900	4511100	4775000	0	1924800	4776500	0	0	0	7
QLFSFPIK	978.554	Q6ZQ08	Cnot1	CCR4-NOT transcription complex subunit 1	2	0.057813	56.011	0	0	0	0	0	4801000	0	0	0	2
FFVTTLPAFFHAK	1524.81	Q0P5W2	Tmx4	Thioredoxin-related transmembrane protein 4	3	0.066015	28.624	0	0	0	0	0	4835100	0	0	0	2
AGTQLLAGLR	998.587	Q3U4C8	Itgav	Integrin alpha-V;Integrin alpha-V heavy chain;Integrin alpha-V light chain	2	0.039714	53.166	0	0	0	5931700	0	4878200	0	0	0	2
AAAASAAEAGIATPGTEGER	1799.87	Q3ULG4	Psmd4		2	3.94e-10	106.32	4943400	0	0	0	0	4924900	0	0	0	6
LQQENMNLLSDAR	1530.75	Q5SNZ0	Ccdc88a	Girdin	2	0.00052554	79.741	5265300	4611600	5792700	7336800	3312300	4964600	0	0	0	6
VTLLLFK	832.542	Q8QZZ7	Tprkb	EKC/KEOPS complex subunit Tprkb	2	0.05153	62.714	6213600	0	5312700	0	0	4971100	0	0	0	6
APTGSTPGPQGTLPAR	1506.78	Q8C9B9	Dido1	Death-inducer obliterator 1	2	0.002642	59.57	7432200	0	6859200	8755300	0	5002900	0	0	0	6
NFVENFSVISR	1310.66	Q91WG4	Elp2	Elongator complex protein 2	2	0.0027338	75.378	9181200	0	7270900	5624700	0	5007800	0	0	0	7
LLLPCLVR	982.6	Q148R8	Ints2	Integrator complex subunit 2	2	0.015003	77.748	6026700	0	6450200	5764900	2768500	5046200	0	0	0	8
DGAFAEFLR	1024.5	A5D6P3	Abcc1	Multidrug resistance-associated protein 1	2	0.061096	50.607	0	0	0	0	4489900	5048200	0	0	0	2
SFNSLPDEDDCQIK	1666.71	Q60664	Lrmp	Lymphoid-restricted membrane protein;Processed lymphoid-restricted membrane protein	2	3.51e-05	95.81	0	8753800	0	0	0	5058500	0	0	0	2
ITINPGCVVVDGMPPGVSFK	2086.06	G3UYD0	Gtf2i	General transcription factor II-I	2	0.0030054	57.679	0	0	6863500	0	0	5109100	0	0	0	3
MGFPPGAAQALVLQVFK	1772.96	B0FTY3	Nudcd3	NudC domain-containing protein 3	3	0.068049	16.88	0	0	0	0	3469500	5123100	0	0	0	2
TLFLELIR	1003.61	Q9D2E2	Toe1	Target of EGR1 protein 1	2	0.063276	54.549	5699500	0	4160700	0	4266400	5131800	0	0	0	4
EAPDGCPDHVLR	1364.61	Q9Z0E0	Ncdn	Neurochondrin	3	0.026901	43.604	0	0	7377000	6360800	3874100	5139400	0	0	0	6
DIILFSFK	981.554	A1ILG8	Vps13c	Vacuolar protein sorting-associated protein 13C	2	0.027274	66.073	11151000	9424900	6356600	0	0	5163700	0	0	0	9
KNPEVPVNFAEFSK	1604.82	A2AP78	Hmgb3	High mobility group protein B3	2	0.050966	55.314	0	0	0	7278300	0	5175700	0	0	0	3
APAAIGPYSQAVQVDR	1641.85	P52760	Hrsp12	Ribonuclease UK114	2	0.00023801	75.739	12382000	8898600	8191500	7916300	0	5210100	0	0	0	11
LSPGAYPTVIQQQTAPSQR	2041.06	B5B2P6	Nfatc2	Nuclear factor of activated T-cells, cytoplasmic 2	2	0.043798	42.789	8815300	0	0	0	0	5248300	0	0	0	2
DWINAAFR	991.488	Q3TR20	Cog7	Conserved oligomeric Golgi complex subunit 7	2	0.018482	74.439	0	7050900	6246300	6195300	0	5251800	0	0	0	6
LSAAPGPPDDGTLLSEAK	1737.88	B1AXI9	Cep131	Centrosomal protein of 131 kDa	2	0.0027909	49.423	8856600	0	7389300	5626100	0	5260400	0	0	0	4
ETIQGTGSWGPEPPGPGTTYSNPR	2485.15	Q9EP97	Senp3	Sentrin-specific protease 3	2	0.011247	45.864	0	0	6204300	0	0	5280600	0	0	0	3
LGSFCLSEAGAGSDSFAMK	1933.86	Q7TMY2	Acadsb	Short/branched chain specific acyl-CoA dehydrogenase, mitochondrial	2	0.018847	39.424	0	5546400	0	0	0	5292900	0	0	0	2
LINSQEELIQCLK	1586.83	F8VQE2	Kif21b	Kinesin-like protein;Kinesin-like protein KIF21B	2	0.0004951	80.706	4844100	0	0	4487900	0	5301100	0	0	0	2
VCLYLTSCVNYVPEPENSALLR	2596.27	Q3TXV1	Psmd2	26S proteasome non-ATPase regulatory subunit 2	2	0.000407	70.963	0	0	0	0	5632700	5301300	0	0	0	3
ELGGLGMLSMGHVLIPQSDLR	2222.16	Q99PV0	Prpf8	Pre-mRNA-processing-splicing factor 8	2	5e-05	93.494	4282500	4250400	3897700	7269000	0	5322500	0	0	0	5
TPFCFVINALSQR	1551.79	F8WIK5	Plekha2	Pleckstrin homology domain-containing family A member 2	3	0.0074849	38.799	0	3396700	0	0	3973600	5323300	0	0	0	3
GPFYFVQGADTQFGLMK	1904.91	D3Z7F7	Cpped1	Serine/threonine-protein phosphatase CPPED1	2	0.079784	30.55	0	0	4864200	0	0	5329700	0	0	0	2
QDDPFELFVAATNIR	1734.86	Q8K224	Nat10	N-acetyltransferase 10	3	0.019251	40.801	0	5442400	0	6568200	0	5342600	0	0	0	3
TYDAASCEVSYR	1420.59	Q9R007	Clec5a	C-type lectin domain family 5 member A	2	0.002742	70.1	0	0	0	0	0	5421600	0	0	0	2
CSVTLLNETDILNQYLDK	2138.06	Q3TZP3	Mta2	Metastasis-associated protein MTA2	2	1.42e-07	127.71	8596500	11384000	6918000	12469000	7599300	5434500	0	0	0	8
AGQSQNNPGEAVTEPER	1782.81	S4R219	Dennd2d	DENN domain-containing protein 2D	2	0.00037288	63.537	0	8403000	0	0	4208600	5451600	0	0	0	4
ASPDASSNPEPAETR	1527.68	S4R270	Bin2	Bridging integrator 2	2	0.0009426	70.488	4581200	7244700	9037200	4172700	0	5462500	0	0	0	5
LTDAFLLLR	1060.63	F7CJY7	Stx16	Syntaxin-16	2	0.018061	64.265	0	0	0	0	0	5465700	0	0	0	2
ETSDCSYMFEWR	1609.62	B9EKB8	Igf2r	Cation-independent mannose-6-phosphate receptor	2	0.012298	58.37	4574700	3908500	5218300	3848200	4230100	5489500	0	0	0	5
EIEGLLENIR	1184.64	Q3TET1	Kif3a	Kinesin-like protein;Kinesin-like protein KIF3A	2	0.018465	60.828	0	0	0	8802400	0	5501900	0	0	0	4
QVVEQDEEEDEELTLK	1931.88	Q3UYK2	Psen1	Presenilin;Presenilin-1;Presenilin-1 NTF subunit;Presenilin-1 CTF subunit;Presenilin-1 CTF12	2	2.78e-05	89.403	8837800	5711700	0	7321700	6709300	5518700	0	0	0	6
YPLLLQSIGQNTEESTER	2077.03	E9PUF7	Arhgef1	Rho guanine nucleotide exchange factor 1	2	0.0099141	45.257	6981900	0	0	0	0	5537300	0	0	0	3
LGISFQPAFR	1134.62	Q8C3Y4	Kntc1	Kinetochore-associated protein 1	2	0.0062273	73.248	4665900	0	0	8378100	0	5572200	0	0	0	3
CSNEEVTSMIQAGDTSK	1855.79	E9QLA5	Inf2	Inverted formin-2	2	0.0010342	73.466	4512000	0	6331400	0	0	5606100	0	0	0	4
EYLFYAEALR	1273.63	Q80X54	Snx4	Sorting nexin-4	2	0.009618	76.827	7148500	7104800	0	0	7870900	5636100	0	0	0	5
LFCWIVTR	1093.57	Q5SYD0	Myo1d	Unconventional myosin-Id	2	0.03	63.48	0	3812300	5109400	0	5877500	5665300	0	0	0	5
EATTDFTVDSR	1240.56	Q80X90	Flnb	Filamin-B	2	0.083058	42.718	0	0	0	0	7537200	5666000	0	0	0	2
LIFSLLR	860.548	G3X922	Dnajc13		2	0.040353	68.485	0	0	0	0	6345600	5678800	0	0	0	2
NSGTFSSQIENTPVLCPFHLQPVPEPETVLK	3464.73	Q811J3	Ireb2	Iron-responsive element-binding protein 2	3	0.075124	9.381	0	0	0	0	0	5681100	0	0	0	2
TEEALQLYNQIIK	1561.84	F8VQC1	Srp72	Signal recognition particle subunit SRP72	3	0.0054055	36.236	5640500	0	6814700	0	6637300	5688300	0	0	0	4
LFFEFYR	1020.51	O88508	Dnmt3a	DNA (cytosine-5)-methyltransferase 3A	2	0.033168	73.039	6945200	0	0	0	0	5690000	0	0	0	3
VGLLATLQDTQK	1285.72	Q3TBD4	Bicd2	Protein bicaudal D homolog 2	2	0.010645	59.426	0	0	0	6737600	6893400	5694100	0	0	0	5
ADQSISEEPGWEEEEEELEGIVPSPK	2912.31	Q80Y55	Bsdc1	BSD domain-containing protein 1	3	0.0098529	30.024	6829000	0	3898500	4890800	3034200	5727200	0	0	0	6
LYGSGGPPPTGEEDTSEK	1819.81	Q3U9G2	Hspa5	78 kDa glucose-regulated protein	2	0.016798	42.809	0	0	0	0	0	5732200	0	0	0	3
ILSVSELLK	1000.62	Q6PGH6	Nbas		2	0.0093866	75.213	5324300	0	5972500	5714000	4176500	5739700	0	0	0	5
DLLQLLGSCQEAAR	1572.79	Q3U5Q7	Cmpk2	UMP-CMP kinase 2, mitochondrial	2	0.00016024	88.441	0	0	0	0	6543900	5775900	0	0	0	2
LLTAAELLLDYDTGSEEAEEGAESSQEPVAHTVSEPK	3914.84	Q8K352	Sash3	SAM and SH3 domain-containing protein 3	3	0.047399	12.865	8419900	8004800	9654200	0	0	5802100	0	0	0	7
SILTVPWVELGGECNINCSK	2275.1	Q8VDM5	Osbpl9	Oxysterol-binding protein;Oxysterol-binding protein-related protein 9	2	0.0011322	51.218	4486200	0	0	0	3408700	5812900	0	0	0	3
TESPVLTNSCR	1262.59	Q99KD5	Unc45a	Protein unc-45 homolog A	2	0.0015103	78.934	0	0	0	4723800	4499700	5824100	0	0	0	3
ALQLLDEVLHTMPIADPQPLD	2328.2	E3SRG8	Smad4	Mothers against decapentaplegic homolog;Mothers against decapentaplegic homolog 4	2;3	7.67e-05	87.498	0	0	22973000	17004000	0	5833400	0	0	0	5
FQEDIISIWNK	1391.71	Q3UUT0	Eif4e2	Eukaryotic translation initiation factor 4E type 2	2	0.02474	55.064	0	0	0	0	8305800	5859900	0	0	0	2
IANEQISASSTFSDGR	1681.79	Q3U5I8	Nrp2	Neuropilin-2	2	0.066208	34.96	0	0	0	0	5138300	5870800	0	0	0	2
DEPEDDGYFAPPK	1478.62	Q04750	Top1	DNA topoisomerase 1	2	0.0034229	64.82	4848700	6505200	4091400	0	0	5895900	0	0	0	5
ILGAWLAEETSSLR	1544.82	Q9Z0E0	Ncdn	Neurochondrin	2	0.0013127	72.434	5375100	0	6136100	8725100	0	5922200	0	0	0	5
TAQDANPLDSIDLSSAVFDCK	2266.04	B1AVH7	Tbc1d2	TBC1 domain family member 2A	2;3	1.26e-06	81.619	12305000	0	5948400	3873300	3559700	5951900	0	0	0	7
MLMALVSDSALFNTR	1667.84	Q9DBX5	Pla2g4a	Cytosolic phospholipase A2;Phospholipase A2;Lysophospholipase	2	1.91e-05	99.522	8366500	7638600	7052500	0	0	5985700	0	0	0	4
SNVPVETTDEMPFSFSDR	2056.9	Q2TBA3	Malt1	Mucosa-associated lymphoid tissue lymphoma translocation protein 1 homolog	2	0.00048591	62.042	7172700	7282700	0	0	0	5987400	0	0	0	3
HTLDELNPQK	1193.6	Q3TUQ7	Prkaa1	5-AMP-activated protein kinase catalytic subunit alpha-1	2	0.0019205	88.37	0	0	0	0	0	6000000	0	0	0	3
VFDYSEYWEGAR	1520.66	G5E8R3	Pcx;Pc	Pyruvate carboxylase;Pyruvate carboxylase, mitochondrial	2	0.0012501	76.228	9340600	8413600	9141900	0	6808400	6035400	0	0	0	5
CIGEGQFGDVHQGVYLSPENPALAVAIK	2968.48	K7Q751	Ptk2	Focal adhesion kinase 1	3	0.063689	13.702	0	0	0	0	0	6080100	0	0	0	2
LNEENGALLQCALLYTSCAGQR	2480.18	Q3V222	Sec24c		3	0.0062195	33.833	8543200	7014100	5240400	7335500	3961900	6085600	0	0	0	6
DASLTNQDALPFYTEGETK	2098.97	B1ARU4	Macf1	Microtubule-actin cross-linking factor 1	2	0.010698	43.382	0	8834600	0	0	0	6088200	0	0	0	2
FPAVGEPNIQQYAQNMGLPQNR	2471.2	Q8CGY8	Ogt	UDP-N-acetylglucosamine--peptide N-acetylglucosaminyltransferase 110 kDa subunit	2	5.76e-07	85.258	0	0	6122300	0	0	6099700	0	0	0	3
ALFIVPR	814.507	A2AT37	Upf2		2	0.02255	80.999	7147900	6790500	0	7127600	0	6111300	0	0	0	6
ELTLMALHMIPLILLTTSPK	2234.28	Q9ME04	ND4;mt-Nd4;Mtnd4	NADH-ubiquinone oxidoreductase chain 4	3	0.00035034	53.909	0	0	10886000	0	0	6128800	0	0	0	2
GCTEGQLPEATFSDGQR	1851.81	K4DI77	Wdr81	WD repeat-containing protein 81	2	0.0037421	51.218	7137300	6027200	4698600	5537300	0	6136100	0	0	0	5
LHLFPDEDIPEDILK	1792.92	Q7TMH5	Mrpl13	39S ribosomal protein L13, mitochondrial	3	0.0084375	37.156	5955500	0	6979800	0	6388600	6160200	0	0	0	6
LGEIQVVDASSLLAPLPR	1877.06	Q3TAJ0	Engase	Cytosolic endo-beta-N-acetylglucosaminidase	2	0.0020557	59.227	4210600	6042500	0	0	4408100	6187800	0	0	0	2
IPDIYDCIK	1135.56	E9Q9J4	Ppip5k2	Inositol hexakisphosphate and diphosphoinositol-pentakisphosphate kinase 2	2	0.067162	48.794	0	0	6842700	0	0	6195000	0	0	0	2
ENQCVIISGESGAGK	1547.72	E9Q634	Myo1e	Unconventional myosin-Ie	2	0.0066254	56.225	0	0	0	0	6531200	6195000	0	0	0	2
QEGIATSDNFMQAFLNVLEQCPK	2639.24	F7CBP1	Eif4g2	Eukaryotic translation initiation factor 4 gamma 2	2;3	0.002232	45.864	0	0	0	0	13030000	6207600	0	0	0	3
DNIACVILTFK	1292.68	Q790Y8	G6pdx	Glucose-6-phosphate 1-dehydrogenase;Glucose-6-phosphate 1-dehydrogenase X	2	0.00455	70.1	6904700	4609800	0	0	9649800	6218900	0	0	0	5
GFSEEHNTWEPEK	1588.68	Q61686	Cbx5	Chromobox protein homolog 5	2	0.00035919	119.53	0	0	7634300	8555800	0	6219300	0	0	0	4
EPSSTVNTEVYPK	1449.7	Q9ERB0	Snap29	Synaptosomal-associated protein 29	2	0.0035276	64.297	5549400	8693900	6163800	0	6657500	6220400	0	0	0	9
LAADPSVVNLGQGFPDISPPSYVK	2470.27	Q71RI9	Ccbl2	Kynurenine--oxoglutarate transaminase 3	2;3	0.0018177	25.866	5857100	0	7991100	4039200	5309600	6248800	0	0	0	5
NVPSAGGGIGDGGQEPTTGNWR	2125.98	Q3U4P3	Dnm1l		2	0.063943	27.649	0	0	0	6515100	0	6269800	0	0	0	2
FNPILDMLAAFK	1378.73	Q7TSH2	Phkb	Phosphorylase b kinase regulatory subunit beta	2	0.0076277	61.353	6720900	6852200	7001700	0	5326300	6269900	0	0	0	6
LTQIQESQVTSHNK	1611.82	A2AQ19	Rtf1	RNA polymerase-associated protein RTF1 homolog	3	0.0014407	49.482	0	5542400	11581000	0	0	6275900	0	0	0	2
QFDAGTVNYEQPTK	1596.74	Q91YE7	Rbm5	RNA-binding protein 5	2	0.015005	49.5	7647300	0	0	0	0	6286800	0	0	0	2
FNPVETFLLGSCASDR	1811.85	Q6PAC3	Dcaf13	DDB1- and CUL4-associated factor 13	2	0.0052048	53.967	0	0	0	4861300	0	6322800	0	0	0	2
YNTDCVQGLTHSK	1521.69	Q8VCE0	Atp1a3	Sodium/potassium-transporting ATPase subunit alpha-3	2	0.00062421	78.096	0	0	0	0	0	6335800	0	0	0	5
EVLMCGNNNCCR	1525.59	O88508	Dnmt3a	DNA (cytosine-5)-methyltransferase 3A	2	3.01e-05	101.64	0	6527600	8117300	8021800	0	6346000	0	0	0	7
VDSGIQPGSDISIYYDPMISK	2284.09	Q3UGC8	Pcca	Propionyl-CoA carboxylase alpha chain, mitochondrial	2	0.010842	40.025	10299000	9919200	7732800	5715900	0	6373000	0	0	0	5
YQDYTNELQETLPQK	1868.88	Q3THP3	Tbk1	Serine/threonine-protein kinase TBK1	2	0.0036508	60.49	0	0	0	7425200	0	6392100	0	0	0	3
LMHQAALLGQALK	1392.79	Q9JMH6	Txnrd1	Thioredoxin reductase 1, cytoplasmic	3	0.047632	22.55	0	0	0	0	10354000	6393300	0	0	0	2
EPSWGSPATAPYSLETLK	1932.95	E9Q585	Slc4a1ap		2	0.021629	41.092	10997000	0	8200800	0	5565700	6394400	0	0	0	4
DGGQQFTEEFQTLNPMK	1968.89	Q9WVL0	Gstz1	Maleylacetoacetate isomerase	2	9.08e-06	80.522	10068000	0	7169100	9103700	4292400	6396000	0	0	0	5
AIIASNIMYIVGQYPR	1807.97	Q6P5F9	Xpo1	Exportin-1	2;3	3.78e-06	105.46	8556900	6920700	0	0	18593000	6396000	0	0	0	5
YYSSDYYYVGGFYGGCNEALMK	2606.08	Q3U9B7	Ctsc	Dipeptidyl peptidase 1;Dipeptidyl peptidase 1 exclusion domain chain;Dipeptidyl peptidase 1 heavy chain;Dipeptidyl peptidase 1 light chain	2;3	0.0043559	57.159	0	0	0	0	10338000	6406200	0	0	0	3
VVDSLAPSITNVLVQGK	1738.98	Q7TSH2	Phkb	Phosphorylase b kinase regulatory subunit beta	2	0.0040366	50.149	0	0	0	0	0	6415000	0	0	0	2
QTSNCVLEICAEQR	1706.77	Q8K1X4	Nckap1l		2	0.019083	47.288	4473500	0	0	0	0	6417700	0	0	0	2
VFLHLADIYTK	1318.73	Q6NS46	Pdcd11	Protein RRP5 homolog	3	0.022597	42.629	0	0	4844800	0	4202400	6426200	0	0	0	6
ALASTCKPELQK	1344.71	Q3UW53	Fam129a	Protein Niban	3	0.0011136	73.632	0	0	0	0	6979600	6429200	0	0	0	2
ELLLNDNYLR	1261.67	D3YXZ0	Cnot6l	CCR4-NOT transcription complex subunit 6-like	2	0.0026654	83.005	0	0	5380500	0	0	6429500	0	0	0	2
NFPAVFR	849.45	Q9Z120	Mettl1	tRNA (guanine-N(7)-)-methyltransferase	2	0.079095	56.51	0	0	0	8160200	0	6451600	0	0	0	2
LSVLDLVVALAPYSDEAAISK	2173.19	Q3UJA1	Rrp12	RRP12-like protein	3	0.0041626	40.097	7792900	8104400	10033000	0	0	6456400	0	0	0	4
LFLTMEINPK	1204.65	Q9JHU4	Dync1h1	Cytoplasmic dynein 1 heavy chain 1	2	0.0080876	69.598	0	0	0	0	6057900	6467000	0	0	0	2
PVLVLSQNTK	1097.64	Q3U4U6	Cct3;Cctg	T-complex protein 1 subunit gamma	2	0.03114	56.258	5476500	0	0	7076000	0	6467900	0	0	0	3
NNGAGYFLEHLAFK	1579.78	Q3TIC8	Uqcrc1	Cytochrome b-c1 complex subunit 1, mitochondrial	3	0.013572	37.156	0	0	0	0	0	6468000	0	0	0	3
STLSVIPSGVQWIQDR	1784.94	F6ZKZ3	Sqrdl	Sulfide:quinone oxidoreductase, mitochondrial	2;3	3.12e-08	100.04	6166300	0	0	0	6724100	6512300	0	0	0	3
LFIWVLR	945.58	Q5HZI6	Tsta3	GDP-L-fucose synthase	2	0.01573	94.669	0	0	6242600	0	9858200	6550000	0	0	0	6
VTIMGIYSIK	1123.63	Q8BQ03	Mcm5	DNA helicase;DNA replication licensing factor MCM5	2	0.0065357	72.643	0	0	0	0	9153100	6563800	0	0	0	2
VVNAVLTQIDQIK	1439.83	Q3UA06	Trip13	Pachytene checkpoint protein 2 homolog	2;3	0.0092185	59.542	0	0	15807000	0	7353400	6577000	0	0	0	2
AVSTALVAPVPAPNSTVYQVR	2139.17	A2AS05	Helz2	Helicase with zinc finger domain 2	2	0.00061425	54.524	0	0	0	0	0	6585800	0	0	0	5
SFSALAECCVPFEPGQR	1953.87	Q6PGG2	Gmip	GEM-interacting protein	2	0.0040559	64.55	0	10513000	0	0	0	6589200	0	0	0	3
LEPIETNQNAVFQYISR	2021.02	D3YZL3	Zfp800;Znf800	Zinc finger protein 800	2	0.00033797	65.043	0	0	0	0	0	6610900	0	0	0	2
VVSPGIDLSGLTLQSNAPSMLVK	2325.26	E3SRG8	Smad4	Mothers against decapentaplegic homolog;Mothers against decapentaplegic homolog 4	2;3	2.23e-05	63.709	18697000	0	6626900	9333100	0	6651300	0	0	0	5
HLFTSTSSATDSGCDTPPSSR	2209.95	Q8K078	Slco4a1	Solute carrier organic anion transporter family member 4A1	3	0.014327	19.31	0	0	0	9666600	0	6654800	0	0	0	2
LCSTQLSLNCPLCVNPVCR	2290.07	Q4QRK2	Fech	Ferrochelatase;Ferrochelatase, mitochondrial	2	0.017294	53.967	0	5328400	0	3684900	0	6688700	0	0	0	3
DSNQFHATCLDTFPPISYLNDTSR	2798.26	Q3UYC1	Mvd	Diphosphomevalonate decarboxylase	3	0.042254	14.064	6199100	0	0	10453000	5594200	6700700	0	0	0	5
MDGTYACSYTPLK	1505.65	Q80X90	Flnb	Filamin-B	2	0.001628	73.781	0	0	0	8855500	0	6705700	0	0	0	5
NPMCDNFGDQSSYISAIR	2073.89	Q99JX7	Nxf1	Nuclear RNA export factor 1	2	6.51e-05	75.045	0	0	0	6857600	0	6724000	0	0	0	2
IPPCISNWK	1113.56	Q9CSN1	Snw1	SNW domain-containing protein 1	2	0.01054	73.665	0	10414000	9361400	11144000	0	6741000	0	0	0	7
AGAGGPGLAALVAFVR	1425.81	Q9CQT1	Mri1	Methylthioribose-1-phosphate isomerase	2	0.021197	61.958	9764500	8717400	6905800	0	0	6762600	0	0	0	4
YCLPASPPVTLPIQVMLAPLQK	2435.33	B2RWX4	Rint1	RAD50-interacting protein 1	3	0.00022691	51.348	0	0	5099000	0	0	6814000	0	0	0	2
QLSSWCGPSSEIR	1505.69	Q9D4G5	Pop1;mKIAA0061		2	0.020944	47.894	6654400	0	5629300	0	0	6814600	0	0	0	3
LVSPETEASEESLQFSLEKPTTAER	2777.36	A2AU89	Trp53bp1;Tp53bp1	Tumor suppressor p53-binding protein 1	3	0.074784	19.975	0	0	0	0	0	6818400	0	0	0	2
EQLLEALQDLK	1298.71	A0A087WSB5	Nudt16	U8 snoRNA-decapping enzyme	2	0.0020454	77.379	12076000	12820000	13249000	9916300	7486300	6877500	0	0	0	9
TQPPEPAAEETPSR	1508.71	Q8CJF7	Ahctf1	Protein ELYS	2	0.010586	54.471	0	0	0	8827800	0	6878200	0	0	0	4
MGVEAVIALLEATPETPACVVSLR	2525.32	Q8C605	Pfkp	ATP-dependent 6-phosphofructokinase;ATP-dependent 6-phosphofructokinase, platelet type	3	1.01e-06	40.177	0	0	0	0	9286100	6885000	0	0	0	2
GMVSAYPR	879.427	Q921D5	Mcm4	DNA replication licensing factor MCM4	2	0.059706	55.504	0	7456200	0	7273300	0	6894500	0	0	0	3
VLILEQLLNSIK	1381.85	Q5PRF0	Heatr5a	HEAT repeat-containing protein 5A	2	0.00029335	86.898	5576700	0	9021000	0	6014600	6921000	0	0	0	5
ELSADGAQEATGTQR	1532.71	A2AI52	Usp8	Ubiquitin carboxyl-terminal hydrolase;Ubiquitin carboxyl-terminal hydrolase 8	2	0.00011713	99.522	7993500	6643100	0	10294000	0	6922300	0	0	0	4
FFDLFEK	944.464	E9Q9J4	Ppip5k2	Inositol hexakisphosphate and diphosphoinositol-pentakisphosphate kinase 2	2	0.078932	56.547	0	0	0	5026300	0	6960100	0	0	0	3
LMCPQEIVDYIADKK	1821.9	F6ZFT1	Ndufab1	Acyl carrier protein;Acyl carrier protein, mitochondrial	3	0.005536	39.143	0	0	8516400	0	0	6970700	0	0	0	3
ITVVGVGAVGMACAISILMK	1989.08	Q564E2	Ldha	L-lactate dehydrogenase;L-lactate dehydrogenase A chain	3	0.0040071	42.309	0	0	0	0	5175400	6974200	0	0	0	2
TSSMEISSILQELK	1564.8	H7BX26	Cep170	Centrosomal protein of 170 kDa	2	0.00072026	76.533	6939300	5146200	0	6882600	7424900	6981000	0	0	0	7
EELLENEDEQNSPPK	1769.8	F8WHU5	Pds5b	Sister chromatid cohesion protein PDS5 homolog B	2	0.0060714	57.019	0	11823000	0	7072700	0	6989900	0	0	0	3
LLLDNFLK	974.58	F8VQE2	Kif21b	Kinesin-like protein;Kinesin-like protein KIF21B	2	0.026266	67.032	0	0	0	0	4859100	7002400	0	0	0	3
WQWIDDTPFSQNVR	1790.84	Q3U3M9	Clec4n;Clec6a	C-type lectin domain family 6 member A	2	5.86e-05	93.821	0	0	0	0	4704900	7003900	0	0	0	2
NFDFEDVFVNIPR	1610.77	Q9DC69	Ndufa9	NADH dehydrogenase [ubiquinone] 1 alpha subcomplex subunit 9, mitochondrial	3	0.0010303	49.356	9639700	10853000	9046400	0	9890400	7017200	0	0	0	5
ELQLPSMSMLTSK	1463.74	Q4JG03	Huwe1	E3 ubiquitin-protein ligase HUWE1	2	0.034106	45.908	9057300	0	0	11930000	0	7034000	0	0	0	3
LLQDYSELEEENISLQK	2050.01	Q3TBD4	Bicd2	Protein bicaudal D homolog 2	2	0.04914	48.004	0	6621600	0	0	0	7041700	0	0	0	2
ELQALGFQPGPITDTTR	1842.95	Q6DVA0	Lemd2	LEM domain-containing protein 2	2	0.0019282	57.802	0	0	0	0	5810700	7076800	0	0	0	2
MLLLPSAAEGQGTAITHALTSASSVCQVEPVGR	3350.7	P54103	Dnajc2	DnaJ homolog subfamily C member 2;DnaJ homolog subfamily C member 2, N-terminally processed	3	0.028579	20.878	0	4129900	3544100	9566100	5035000	7081300	0	0	0	6
IPLSQLLTSDNMTINQR	1943.01	Q3TZZ7	Esyt2	Extended synaptotagmin-2	3	0.0092174	33.624	0	0	5836000	0	0	7085300	0	0	0	2
QVTLSDLYCLDLHK	1703.86	G3UZ63	Klhdc4	Kelch domain-containing protein 4	3	0.03084	24.697	0	0	0	0	7687000	7141400	0	0	0	3
ALFCGVTCALDSDGNLVLDPTTK	2466.18	Q9CRA8	Exosc5	Exosome complex component RRP46	2;3	0.024115	27.335	9945100	6674600	8065100	7955600	0	7142300	0	0	0	7
VDDIFSDLYYVR	1503.72	G3X8R5	Qrich1	Glutamine-rich protein 1	2	0.00065914	81.865	9038800	10340000	0	8610300	0	7146600	0	0	0	2
YFTFMDLK	1063.5	Q9QY81	Nup210	Nuclear pore membrane glycoprotein 210	2	0.035423	61.999	5473200	5311600	10566000	6685400	0	7163300	0	0	0	5
SNLLLLK	799.517	Q8R3K3	Ptcd2	Pentatricopeptide repeat-containing protein 2, mitochondrial	2	0.060041	60.799	0	0	0	0	0	7176300	0	0	0	2
GFVFNLIK	936.543	Q8C147	Dock8	Dedicator of cytokinesis protein 8	2	0.045869	59.205	0	0	0	0	10576000	7191800	0	0	0	2
YGLLAAILGDK	1132.65	Q99LC3	Ndufa10	NADH dehydrogenase [ubiquinone] 1 alpha subcomplex subunit 10, mitochondrial	2	0.015417	59.426	0	0	4064800	0	7672800	7204300	0	0	0	3
DAGYITSPGYPQDYPSHQNCEWIVYAPEPNQK	3723.66	Q3U5I8	Nrp2	Neuropilin-2	3	0.011452	28.042	0	0	0	0	0	7219100	0	0	0	4
ILCQEEQDAYR	1423.64	P46737	Brcc3	Lys-63-specific deubiquitinase BRCC36	2	0.00049092	93.178	0	8777100	0	0	6650400	7224200	0	0	0	3
LATSLWLR	958.56	Q6NS82	Fam134a	Protein FAM134A	2	0.039264	60.972	0	0	0	5661100	0	7225300	0	0	0	4
EPNQAFGSGNNSYSGSNSGAPLGWGSASNAGSGSGFNGGFGSSMDSK	4443.86	Q544R5	Tardbp	TAR DNA-binding protein 43	4	0.065036	2.7379	0	7871100	0	0	0	7226600	0	0	0	2
NDSLESTGLGLSSSR	1521.73	Q8CI71	Ccdc132	Coiled-coil domain-containing protein 132	2	0.0013978	65.563	6756700	5860800	6259700	0	5982700	7239900	0	0	0	5
DLLFILTAK	1032.62	Q3U1J4	Ddb1	DNA damage-binding protein 1	2	0.036489	57.96	0	11469000	12516000	0	0	7261500	0	0	0	4
DCHEEVYAGSHQYPGR	1903.79	Q6P9T6	Acbd3	Golgi resident protein GCP60	3	0.020268	30.739	0	0	0	0	4682900	7294800	0	0	0	3
MDDDVFLR	1009.45	O08847	Polr2a	DNA-directed RNA polymerase;DNA-directed RNA polymerase II subunit RPB1	2	0.064742	54.157	0	0	6839500	0	0	7312600	0	0	0	2
DQAQEDAQEIADTPSGDK	1916.82	F8WIT2	Anxa6	Annexin	2	0.00055906	61.641	9388100	6477200	5451600	4510100	6966800	7320500	0	0	0	9
ILQEYQVQYTPQGDSDDGK	2183	D3Z7P3	Gls	Glutaminase kidney isoform, mitochondrial	2	1.97e-06	83.617	14176000	10536000	10870000	8804300	0	7327400	0	0	0	7
LTNTSFTEIEK	1281.65	Q9D8S3	Arfgap3	ADP-ribosylation factor GTPase-activating protein 3	2	0.0038273	72.2	6992700	0	8347900	0	0	7373700	0	0	0	5
VSPDMAIFITMNPGYAGR	1938.93	Q9JHU4	Dync1h1	Cytoplasmic dynein 1 heavy chain 1	3	0.013573	24.043	8494400	8821600	7504800	0	0	7381100	0	0	0	6
NYFAPLLLK	1077.62	Q3U2B2	Npc1	Niemann-Pick C1 protein	2	0.041218	56.547	5689700	0	0	0	8621200	7392400	0	0	0	3
SYVFYLHQQEQETQGAAAPANPEMDNLPLEPNSILGQVGR	4411.12	E9QM21	Bak1	Bcl-2 homologous antagonist/killer	3;4	0.077758	4.4152	0	0	0	0	5010200	7406100	0	0	0	4
SITNNFDEQPASAGGNR	1776.8	Q9D250	Irak4	Interleukin-1 receptor-associated kinase 4	2	0.0035111	63.537	9193400	7402700	0	0	0	7408100	0	0	0	5
WGIQQNSGFGK	1220.59	Q91Z49	Fyttd1	UAP56-interacting factor	2	0.0011236	83.647	7714900	0	10287000	0	0	7417200	0	0	0	4
LVGMSVLLAK	1029.63	Q3UBB2	Vps36	Vacuolar protein-sorting-associated protein 36	2	0.0023661	85.161	7553100	6290600	6672700	5545000	6752200	7435400	0	0	0	7
VVAIGECGLDFDR	1449.69	Q6P8M1	Tatdn1	Putative deoxyribonuclease TATDN1	2	0.0032866	65.5	10505000	11007000	7503000	9094100	9191200	7435600	0	0	0	6
MYTDIQEPMLNAAQEQFGGNPFATVGSSSTSGEGTQPSR	4089.83	Q9QZM0	Ubqln2	Ubiquilin-2	3	0.047258	11.891	4312400	8004600	9413500	7224900	0	7481300	0	0	0	7
LILQMPR	869.516	Q7TT37	Ikbkap	Elongator complex protein 1	2	0.025783	77.72	0	7511200	0	0	0	7482700	0	0	0	2
GLGISVLEMSHR	1297.68	Q8BTJ1	Psat1	Phosphoserine aminotransferase	3	0.0027741	50.207	0	0	0	0	6144300	7485900	0	0	0	2
ELPTGGQEGEQLQLQK	1753.88	Q8R570	Snap47	Synaptosomal-associated protein 47	2	8.77e-05	78.653	0	9401800	0	0	0	7575900	0	0	0	4
VASDIWKPVLSIDAEPR	1895.02	Q8K327	Champ1	Chromosome alignment-maintaining phosphoprotein 1	3	0.017398	32.688	0	0	0	0	0	7592400	0	0	0	2
SAGYLDDVTLQSAR	1494.73	F8VQJ3	Lamc1		2	0.0035291	63.727	0	0	0	0	0	7606000	0	0	0	2
LLVAESCGALAPYLPK	1700.92	A0A087WSS1	2310035C23Rik;Kiaa1468	LisH domain and HEAT repeat-containing protein KIAA1468	2	2.38e-05	90.685	7054400	8091800	0	8718900	5674100	7616000	0	0	0	4
LGCDWVATIFSR	1423.69	Q8BGG7	Ubash3b	Ubiquitin-associated and SH3 domain-containing protein B	2	0.03989	46.352	0	0	0	7394100	0	7617400	0	0	0	2
AAQLIGTCSQNVAAIQEQVLGLGALRK	2808.53	Q99P31	Hspbp1	Hsp70-binding protein 1	3	0.040605	24.096	0	0	0	5592700	0	7631000	0	0	0	4
YWPLYGEDPITFAPFK	1942.95	P35831	Ptpn12	Tyrosine-protein phosphatase non-receptor type 12	2	4.18e-07	110.86	12226000	10987000	15022000	14533000	0	7631600	0	0	0	4
GLPVDIEDEEPEPPPAIPR	2069.03	Q3UPT4	Map4k1	Mitogen-activated protein kinase kinase kinase kinase;Mitogen-activated protein kinase kinase kinase kinase 1	2	0.018368	53.967	8100800	0	0	0	0	7668600	0	0	0	2
DEVESLMCEK	1238.52	P70268	Pkn1	Serine/threonine-protein kinase N1	2	0.0065357	72.643	0	11454000	0	9843400	0	7671500	0	0	0	2
GVPGPFLVCGPLSTLPNWMAEFK	2516.26	Q60848	Hells	Lymphocyte-specific helicase	2;3	0.014843	49.482	0	0	19949000	0	0	7681500	0	0	0	4
NSLEDLTAEDFR	1408.65	E9Q2H1	Ubr5	E3 ubiquitin-protein ligase UBR5	2	0.00023937	88.681	6742200	6107000	0	6415800	0	7682600	0	0	0	3
ATIDPELNEIHVLSGLSK	1935.03	O89050	Mkln1	Muskelin	3	0.026522	30.152	0	0	10097000	9931600	6896700	7696000	0	0	0	5
CNCIHIDDGPVR	1454.64	D3YW23	Cxcl10	C-X-C motif chemokine;C-X-C motif chemokine 10	2	0.00032182	85.958	0	0	0	0	11813000	7721100	0	0	0	2
TVSLPLPDLGANNLETNMGSDASPFR	2715.32	Q80XC2	Trmt61a	tRNA (adenine(58)-N(1))-methyltransferase catalytic subunit TRMT61A	2;3	1.16e-12	97.836	7579800	7596400	0	22011000	6709300	7727200	0	0	0	5
NPDEVSYAGDNFVR	1581.71	Z4YM25	Slu7	Pre-mRNA-splicing factor SLU7	2	0.0016675	69.979	0	5250800	0	0	0	7742900	0	0	0	3
FEGEPATHTQPGVQLQSNTYDLQESNVGLK	3286.57	Q3UUU4	2018-09-06	Septin-6	3	0.013403	28.042	0	0	0	10699000	0	7746300	0	0	0	5
ASGTGGLSLLPPPPGGK	1504.82	Q0VB06	Necap1	Adaptin ear-binding coat-associated protein 1	2	0.006165	47.288	0	0	0	0	6666300	7747800	0	0	0	2
LNATEEMLQQELLSR	1773.89	Q3U417	Ppfibp1	Liprin-beta-1	2	8.01e-07	114.82	0	11702000	7916400	5874300	0	7753900	0	0	0	4
AEWEVDPDYCEEVK	1767.73	Q5MJS3	Fam20c	Extracellular serine/threonine protein kinase FAM20C	2	0.009759	55.401	0	0	0	0	5759900	7779300	0	0	0	2
AILCLLLGGVER	1312.75	Q3ULD6	Mcm3	DNA helicase;DNA replication licensing factor MCM3	2	0.00019486	90.15	6697700	4805700	0	0	6766000	7795500	0	0	0	5
ILSAENIPNLPPGGGLAGK	1817	Q546R1	Ppm1b	Protein phosphatase 1B	2	0.025313	36.284	0	7580700	0	5889500	0	7797700	0	0	0	3
NLSTVMDDIHTVLK	1584.82	Q8CH18	Ccar1	Cell division cycle and apoptosis regulator protein 1	2	0.017541	58.676	0	0	0	3098700	0	7798500	0	0	0	2
LFTDIFR	910.491	E9PV60	Wdfy4		2	0.013146	103.29	7729500	0	9969200	0	7447300	7805700	0	0	0	6
PGFWDPIGR	1043.52	Z4YM84	Acbd5;Acbd4	Acyl-CoA-binding domain-containing protein 5	2	0.0093866	75.213	6785700	4636600	5665800	5544700	4567400	7834500	0	0	0	8
GVKPITLELGGK	1210.73	Q3TMT4	Aldh9a1	4-trimethylaminobutyraldehyde dehydrogenase	3	0.0065514	43.502	0	0	0	8141200	0	7850400	0	0	0	2
GATQGPSTGTVPQATK	1499.76	Q8R1N0	Znf830	Zinc finger protein 830	2	0.0034349	57.836	11718000	0	0	0	0	7857500	0	0	0	4
EMQDLSEFCSDKPK	1712.74	Q0VBU4	Ccdc47	Coiled-coil domain-containing protein 47	2	0.0029658	81.017	0	0	11689000	12554000	9408700	7870100	0	0	0	4
LFPLIQTMHSNLAGK	1668.9	Q91YZ8	Pabpc4;Gm10110	Polyadenylate-binding protein	3	0.048862	21.814	0	0	12235000	0	0	7883100	0	0	0	2
QQMLENQMEVR	1404.65	Q62261	Sptbn1	Spectrin beta chain, non-erythrocytic 1	2	0.00092597	86.624	7928700	8851300	12366000	0	7681100	7900900	0	0	0	5
ADIWALGCLLYK	1421.74	Q3UHJ0	Aak1;Bmp2k	AP2-associated protein kinase 1;BMP-2-inducible protein kinase	2	0.0036344	66.435	10146000	8212800	0	12287000	0	7903100	0	0	0	4
YNLCIIPIGGGTSVSYGLMCPADETR	2843.33	A2AL50	Agps	Alkyldihydroxyacetonephosphate synthase, peroxisomal	2	0.00012792	67.605	0	0	0	0	6087700	7919800	0	0	0	2
YLVLANMLMK	1194.65	A2AQE4	Cops2	COP9 signalosome complex subunit 2	2	0.035706	54.611	0	5409600	0	0	0	7935900	0	0	0	2
YAVYWDELPSEVR	1625.77	Q80Y98	Ddhd2	Phospholipase DDHD2	2	4.39e-05	95.573	16183000	12224000	14049000	0	6206200	7941400	0	0	0	6
LPGLLMTIIR	1125.69	Q9JIF7	Copb1	Coatomer subunit beta	2	0.0018402	88.948	8511200	0	5809200	0	14479000	7944000	0	0	0	6
NVYYLLEK	1040.55	Q8BT07	Cep55	Centrosomal protein of 55 kDa	2	0.07013	52.716	0	0	0	0	8362500	7970100	0	0	0	4
SLPMGCYFNIYGFGSSYEK	2218.97	Q99KC8	Vwa5a	von Willebrand factor A domain-containing protein 5A	2	0.0018092	59.898	0	6598300	0	0	0	8008300	0	0	0	2
IMDQAITVGAPVIGLNDSGGAR	2154.11	A0PJE6	Pccb	Propionyl-CoA carboxylase beta chain, mitochondrial	2	4.89e-05	63.709	10169000	11028000	0	8453700	0	8011700	0	0	0	4
IAVMELFR	977.537	Q3U1J4	Ddb1	DNA damage-binding protein 1	2	0.0057611	102.72	8470400	8920800	9544100	9068100	8677100	8017900	0	0	0	8
SSLLTELSDSLTK	1392.73	Q8CEJ2	Uxt	Protein UXT	2	0.0018063	90.05	0	0	0	9060500	6610600	8044600	0	0	0	4
SFLVASVLPGPDGNVNSPTR	2026.05	D3YUW8	Pogz	Pogo transposable element with ZNF domain	2;3	2.04e-06	79.633	23252000	0	9185100	8309300	3971400	8055100	0	0	0	6
ALSGYCGFMAANLYAR	1763.81	Q9JIF7	Copb1	Coatomer subunit beta	2	0.003658	61.353	0	7270100	0	0	0	8060500	0	0	0	2
QGQETAVAPSLVAPALSK	1765.96	Q3U4H0	Mapre1	Microtubule-associated protein RP/EB family member 1	2	0.023485	56.569	7935600	6445700	7333800	9689700	9336200	8070700	0	0	0	6
LMSNGVLESNPGQIQALGSNR	2184.1	Q91YK2	Rrp1b	Ribosomal RNA processing protein 1 homolog B	2	0.0079116	57.804	0	0	0	0	0	8072100	0	0	0	2
IEENSLKEEESTEGEK	1849.84	Q5DTP7	Chd4	Chromodomain-helicase-DNA-binding protein 4	3	0.0034777	48.423	13073000	13153000	0	0	13946000	8087800	0	0	0	4
EEFPTLQAAGDQDK	1547.71	G3UX48	Prrc2a	Protein PRRC2A	2	0.0006438	77.062	0	0	0	9274000	8262900	8100900	0	0	0	3
TDLTQGDEVIDTTSEAGETSSTSETTPK	2899.29	Q9ERU9	Ranbp2	E3 SUMO-protein ligase RanBP2	3	0.038139	21.052	0	0	0	0	0	8108100	0	0	0	2
LGLMEMIAFAK	1222.65	B2RSR7	Gpd1l;Gpd1	Glycerol-3-phosphate dehydrogenase [NAD(+)];Glycerol-3-phosphate dehydrogenase 1-like protein;Glycerol-3-phosphate dehydrogenase [NAD(+)], cytoplasmic	2	0.0066351	66.568	10068000	10433000	8757500	0	5188600	8128900	0	0	0	4
QYDAYGSAGFDPGTSSSGQGYWR	2456.03	Q3TJA9	Dnaja3	DnaJ homolog subfamily A member 3, mitochondrial	2	0.00083702	69.716	0	0	0	0	0	8196000	0	0	0	3
EVDELSQSFHATQDSAQLK	2132	Q3UW53	Fam129a	Protein Niban	3	0.058908	19.057	0	0	0	0	11096000	8226200	0	0	0	2
HGLANLTAELLQQGANPNLQTEEALPVPK	3065.61	Q810B6	Ankfy1	Rabankyrin-5	3	0.070717	11.517	0	0	0	0	0	8233500	0	0	0	2
NANCTSDFEEYFAK	1694.69	H9H9S3	Zeb2	Zinc finger E-box-binding homeobox 2	2	0.0035291	62.408	7606300	0	0	0	0	8241600	0	0	0	3
DNQEQYTTIQIANMMEEK	2184.97	P15092	Ifi204;Ifi205b;Mnda	Interferon-activable protein 204;Interferon-activable protein 205-B	2	0.024381	40.113	0	0	0	0	5206600	8245900	0	0	0	2
VDCQAYPQTCQK	1496.64	Q9DC23	Dnajc10	DnaJ homolog subfamily C member 10	2	0.00065914	78.655	0	6553400	0	0	6425900	8249700	0	0	0	6
DQEPEKDGQVAQEETGPEKPSVTR	2653.25	A2AGL5	Aven	Cell death regulator Aven	4	0.065796	19.755	8131800	0	0	0	0	8257100	0	0	0	2
IFVGNVDGADTTPEELAALFAPYGTVMSCAVMK	3473.66	Q3U6A2	Rbm14;p16;Gm21992	RNA-binding protein 14	3	9.37e-05	45.685	0	7261500	9789100	7928400	5025600	8284600	0	0	0	5
AGLSPGFVDMGAEPGR	1559.74	Q6NVG1	Lpcat4	Lysophospholipid acyltransferase LPCAT4	2	0.002642	59.57	0	0	0	8326300	0	8343500	0	0	0	3
TLAFSIPILMQLK	1473.86	Q3TKX4	Ddx52	Probable ATP-dependent RNA helicase DDX52	2	0.00034781	85.377	0	0	0	6742800	4336200	8346900	0	0	0	4
FVQDLSK	835.444	Q91ZJ5	Ugp2	UTP--glucose-1-phosphate uridylyltransferase	2	0.068837	58.819	14369000	0	0	0	19362000	8367400	0	0	0	5
LCGVEVPLSSPAADEDAETEVR	2343.09	Q3UDY2	Sgpp1	Sphingosine-1-phosphate phosphatase 1	2;3	0.00029963	57.804	8537500	4942100	8773600	10692000	7684000	8385700	0	0	0	8
SSQGDALASGPVETGPMK	1730.81	Q9JLN9	Mtor	Serine/threonine-protein kinase mTOR	2	0.0020868	70.622	8438700	6908500	0	7265200	0	8387600	0	0	0	4
ENEWYLAFK	1198.57	Q80V79	Msh2	DNA mismatch repair protein Msh2	2	0.022971	61.999	0	0	0	0	7182400	8415200	0	0	0	2
AEITSQESQISSYEEELLK	2183.05	Q5JC28	Eps15	Epidermal growth factor receptor substrate 15	2	1.82e-06	84.506	12710000	9649200	8520700	9685900	7383100	8431100	0	0	0	12
SAGIPFYIQALLASEPK	1803.98	A8C756	Thada	Thyroid adenoma-associated protein homolog	2	0.002609	71.548	8528100	6850800	0	8557200	0	8439700	0	0	0	7
FSDIYALCVAYPEPLGER	2099	Q571A2	Cul2	Cullin-2	2	0.00035373	81.494	8677600	6685900	5104600	0	7609800	8453100	0	0	0	5
VYVGSIYYELGEDTIR	1875.93	Q3UEB3	Puf60	Poly(U)-binding-splicing factor PUF60	2	0.00072684	66.262	0	5097300	0	4360300	6234800	8461100	0	0	0	4
EDLPNLESSEETEQINK	1973.91	Q3TRJ1	Vps35	Vacuolar protein sorting-associated protein 35	2	0.020119	43.544	0	8976100	0	9901900	5960800	8471500	0	0	0	5
TPEDFVFPLLPNEELR	1914.97	Q3TK92	Arih2	E3 ubiquitin-protein ligase ARIH2	2	0.0048695	54.7	0	0	0	9102000	0	8474400	0	0	0	3
QPDVFEFLER	1278.62	P53569	Cebpz	CCAAT/enhancer-binding protein zeta	2	0.01131	73.233	8778800	0	8778900	0	0	8474700	0	0	0	3
VLWTPQVLTNGVQFFR	1904.03	Q3TZ44	Galm	Aldose 1-epimerase	2	6.4e-08	124.1	12633000	0	10701000	0	0	8503500	0	0	0	4
DGEAPDPEDPSR	1283.53	P24527	Lta4h	Leukotriene A-4 hydrolase	2	0.00065914	78.655	0	11220000	0	11163000	9098100	8522000	0	0	0	4
LVGGMVSYLNDLPSQR	1747.89	Q8BW35	Acox1	Peroxisomal acyl-coenzyme A oxidase 1;Acyl-coenzyme A oxidase	2	3.15e-05	88.187	0	0	5548400	6153900	0	8577300	0	0	0	4
LDPFESSDPFSSSSISSK	1915.87	Q60902	Eps15l1	Epidermal growth factor receptor substrate 15-like 1	2	0.00011944	71.241	14304000	0	0	0	8430500	8582300	0	0	0	3
DLVQLPVVTSSTIVR	1625.94	Q3U2P1	Sec24a	Protein transport protein Sec24A	2	0.01236	48.004	0	5469600	0	4620500	4751000	8585700	0	0	0	6
LDPQLQLHCSDEIANLCAEEAAAQEQTGQVEECLK	3996.81	Q53WR6	Glg1	Golgi apparatus protein 1	3;4	0.00015102	43.728	50360000	70367000	60678000	75697000	0	8588700	0	0	0	9
MTCMGYPGTTLDK	1473.63	Q3U6T2	Naga	Alpha-N-acetylgalactosaminidase	2	0.0026071	68.893	0	0	6783000	0	0	8616000	0	0	0	2
PYFPIPEDCTFIQNVPLEDR	2449.16	Q8C290	Hnrnpu;Gm28062	Heterogeneous nuclear ribonucleoprotein U	2	9.37e-06	100.55	0	0	0	0	9645100	8616600	0	0	0	2
NSLCFPEDTEISK	1538.69	F8VPK5	Rock2	Rho-associated protein kinase;Rho-associated protein kinase 2	2	0.0083296	59.265	0	0	11987000	12108000	8013900	8620400	0	0	0	4
LTSSVSCALDEAAAALTR	1834.91	E9Q1M6	Ankhd1;mFLJ00246;Ankrd17	Ankyrin repeat domain-containing protein 17	3	0.00071993	39.863	0	5091500	6194300	9317900	9434200	8624200	0	0	0	6
VNPVLGPQMFQR	1384.73	Q8K2V6	Ipo11	Importin-11	2	0.015127	56.563	0	0	12924000	12212000	7510300	8627100	0	0	0	5
SETPPVPPPPPYLANYPGFPENGTPGPPISR	3241.61	G3UX48	Prrc2a	Protein PRRC2A	3	0.010823	28.59	0	0	0	0	6506900	8664100	0	0	0	2
SVVYQETNGETR	1381.65	Q8BK29	Prpsap1	Phosphoribosyl pyrophosphate synthase-associated protein 1	2	4.23e-06	111.06	0	8810700	0	0	0	8681900	0	0	0	2
VMITHCNLNEFK	1504.72	Q80VA0	Galnt7	N-acetylgalactosaminyltransferase 7;Polypeptide N-acetylgalactosaminyltransferase	2	0.0089347	60.518	0	0	12155000	10790000	0	8684500	0	0	0	3
EFIQLAGR	932.508	Q8CCX6	Vac14	Protein VAC14 homolog	2	0.028609	64.803	0	0	0	0	0	8746100	0	0	0	3
LAGGQTSQPTTPLTSPQR	1838.95	Q6NWW1	Ube4b;mKIAA0684	Ubiquitin conjugation factor E4 B	2	0.015186	43.382	0	0	0	0	7482300	8759300	0	0	0	3
MLFYSFFK	1081.53	Q3U9X2	Lsm2	U6 snRNA-associated Sm-like protein LSm2	2	0.063044	54.611	0	6491700	11888000	0	0	8796000	0	0	0	3
DITLFHAMDTLYR	1594.78	Q3UKM9	Mta3	Metastasis-associated protein MTA3	2;3	0.0025234	77.662	5426900	12008000	0	4778400	0	8811600	0	0	0	4
AQATPSQPLQSSQPK	1566.8	Q3UHJ0	Aak1	AP2-associated protein kinase 1	2	0.013368	60.434	0	5824200	6919500	0	0	8819700	0	0	0	4
LSQSLLELWR	1243.69	Q99PU8	Dhx30;mKIAA0890	Putative ATP-dependent RNA helicase DHX30	2	0.0007795	99.815	9941600	0	9745000	9120800	8108800	8857200	0	0	0	6
DYLMSTHFWGPVANWGLPIAAINDMK	2946.42	D3Z786	Mpc1	Mitochondrial pyruvate carrier 1	3	0.00075378	27.89	10601000	0	7911600	0	0	8877600	0	0	0	3
GTWEKPGDAAPMGYDFWYQPR	2471.1	P17563	Selenbp1	Selenium-binding protein 1	3	0.0215	21.129	0	0	12835000	9557800	0	8878400	0	0	0	3
LPLCSLPGDPGDGPQTELQR	2149.05	Q3UD01	Atxn7l3b	Putative ataxin-7-like protein 3B	2	1.86e-05	76.522	5436400	12686000	0	12171000	0	8942100	0	0	0	4
TIPLYNLTGLSVSNGK	1675.91	Q5SYD0	Myo1d	Unconventional myosin-Id	2	0.00085592	63.76	9542000	0	6191900	8192600	6642000	8946400	0	0	0	5
NYEYYASHVPESVK	1684.77	Q3U449	Bpnt1	3(2),5-bisphosphate nucleotidase 1	2	7.84e-06	107.97	0	0	0	7742300	0	8947000	0	0	0	3
SFEVVFNDPEK	1309.62	Q91X82	Txnip	Thioredoxin-interacting protein	2	0.00021627	103.7	0	0	6360800	0	7355100	8972600	0	0	0	4
NEPCSSSSSESDLQTVFK	2000.86	Q68FN3	Ubr7	Putative E3 ubiquitin-protein ligase UBR7	2	0.00020793	65.043	7352700	0	9196900	10859000	0	8986900	0	0	0	6
LFLVQLQEK	1116.65	Q9CQF3	Nudt21	Cleavage and polyadenylation specificity factor subunit 5	2	0.0061716	80.165	0	6485100	5044900	5929400	12377000	8992600	0	0	0	3
GFPTDATLDDIKEWLDDK	2077.98	Q8BTU4	Ssb	Lupus La protein homolog	3	1.69e-06	75.97	0	0	0	0	31943000	8999300	0	0	0	2
ESGQLWLDAYLHQ	1558.74	Q920L1	Fads1	Fatty acid desaturase 1	2	0.0034993	64.439	0	0	14039000	0	0	9031800	0	0	0	3
NATELQNSGMSEEELMK	1909.84	Q3TDI5	Pex19	Peroxisomal biogenesis factor 19	2	7.42e-06	83.314	8168000	9659500	0	8339000	0	9049700	0	0	0	5
SEQEEYEAEGIAWEPVQYFNNK	2659.17	Q9WTI7	Myo1c	Unconventional myosin-Ic	3	0.034699	25.257	5648100	0	0	0	0	9112200	0	0	0	2
ALFQLSR	833.476	Q99KD5	Unc45a	Protein unc-45 homolog A	2	0.03504	71.852	0	0	8334400	8468700	6505600	9118500	0	0	0	6
LDWDGIR	873.434	Q8BYI6	Lpcat2	Lysophosphatidylcholine acyltransferase 2	2	0.030996	74.415	0	5567900	0	0	0	9122000	0	0	0	3
GEQDLISNGQQVLVCNQEGSSR	2417.12	J3QMM7	Carkd	ATP-dependent (S)-NAD(P)H-hydrate dehydratase	2;3	0.003883	39.288	6085400	0	5861300	0	0	9123500	0	0	0	3
ELGYVTLMCGDGTNDVGALK	2111.99	Q9EPE9	Atp13a1;mKIAA1825	Manganese-transporting ATPase 13A1	2	0.00044857	59.306	6219400	7749900	6764300	0	0	9124800	0	0	0	5
MAEDELFNK	1095.49	Q569X8	Nup107	Nuclear pore complex protein Nup107	2	0.008403	75.738	0	0	9917400	0	0	9134400	0	0	0	5
ITELFAVALPQLLAK	1625.98	A2AFF6	Stag2	Cohesin subunit SA-2	2	7.08e-05	88.681	0	14403000	15915000	14262000	11728000	9146500	0	0	0	6
YCILTDGSWDMSK	1574.67	Q7TMF2	Eri1	3-5 exoribonuclease 1	2	0.0011231	76.302	0	10117000	12363000	0	5750900	9149700	0	0	0	3
NEASATHCIACQYPNK	1862.8	Q9ERU9	Ranbp2	E3 SUMO-protein ligase RanBP2	3	0.0001289	50.158	0	0	0	13493000	0	9162600	0	0	0	2
LTPIPSTSPNLQAYHQGNTQVSR	2508.27	Q8BIW1	Prune	Protein prune homolog	3	0.00011582	54.223	0	0	9661900	0	0	9176600	0	0	0	2
VDSQYPPVQR	1187.59	Q80WR0	Nup153		2	0.0070204	71.692	0	0	0	12166000	0	9183700	0	0	0	2
LPIFFFGTHETAFLGPK	1921.01	Q99JF8	Psip1	PC4 and SFRS1-interacting protein	3	2.68e-06	84.14	0	0	0	6286100	0	9204300	0	0	0	5
LWIPGFAEMAAPLYPLTK	2017.07	G4V4Z1	gag-pro-pol;gag-pol;mKIAA1466		3	0.00025407	43.208	3508600	0	0	0	4918000	9227300	0	0	0	4
LLVVDKETDEFFK	1581.83	Q3TG37	Slc9a3r1	Na(+)/H(+) exchange regulatory cofactor NHE-RF;Na(+)/H(+) exchange regulatory cofactor NHE-RF1	3	0.0061864	58.098	0	0	0	0	9235700	9233800	0	0	0	2
VLTMAPGLITLEIVPFR	1869.08	Q3TUA8	Papss1	Bifunctional 3-phosphoadenosine 5-phosphosulfate synthase 1;Sulfate adenylyltransferase;Adenylyl-sulfate kinase	2;3	9.65e-05	93.959	0	3235500	5947400	4083000	0	9234300	0	0	0	5
VHLTPVEGVPDSDYINASFINGYQEK	2891.4	Q91V35	Ptpra	Receptor-type tyrosine-protein phosphatase;Receptor-type tyrosine-protein phosphatase alpha	3	0.0016153	39.506	0	0	9549200	9583600	0	9238000	0	0	0	3
SSQLNNPQFVWVVPALR	1954.04	E9PV45	Usp24	Ubiquitin carboxyl-terminal hydrolase;Ubiquitin carboxyl-terminal hydrolase 24	2	9.55e-06	79.741	0	0	9363100	0	0	9251200	0	0	0	3
QVCSGEQLANLDK	1460.69	Q3U8A5	Exoc5	Exocyst complex component 5	2	0.0034993	64.439	0	9341200	7892000	0	0	9251700	0	0	0	3
WCQGINNLQDVWETSEGECNVMLESR	3153.36	Q99PV0	Prpf8	Pre-mRNA-processing-splicing factor 8	3	0.0028466	33.075	0	0	12000000	0	0	9253300	0	0	0	2
TQDTPAFGPALPEGGGPFAANADFR	2503.18	Q7TMS2	Sipa1	Signal-induced proliferation-associated protein 1	3	0.0020336	28.782	0	0	7910200	0	0	9286800	0	0	0	2
PVMLTLLR	941.573	Q4JG03	Huwe1	E3 ubiquitin-protein ligase HUWE1	2	0.0083807	91.626	4904600	7427300	6883500	4467300	0	9326600	0	0	0	5
LLIEHALSFLPFQDCTVQTPQGQDYVGK	3203.6	Q91YL3	Uckl1	Uridine-cytidine kinase-like 1	3	0.00172	33.548	0	0	10132000	0	0	9338900	0	0	0	2
VVALLGFGYR	1093.63	E9QM21	Bak1	Bcl-2 homologous antagonist/killer	2	0.00023315	113.7	10239000	0	0	0	18260000	9365100	0	0	0	3
AWYGLGQTYEILK	1540.79	Q3TEF0	Cdc23	Cell division cycle protein 23 homolog	2	0.00048531	81.017	0	0	7906700	0	7313700	9381600	0	0	0	3
YNMGLPVDFDQYNELHLPAVILK	2688.36	Q8BQW4	Arhgap1	Rho GTPase-activating protein 1	2	0.00046988	48.527	0	0	0	11691000	0	9391500	0	0	0	2
FPESCQDEVR	1265.53	Q5SW19	Cluh	Clustered mitochondria protein homolog	2	0.012233	63.076	0	10189000	0	10499000	0	9455300	0	0	0	6
FSLYPPVPGQESSLQWAGMK	2221.09	Q3U8Y1	Mrps11	28S ribosomal protein S11, mitochondrial	2	0.0048668	64.65	0	15909000	0	15016000	0	9509900	0	0	0	5
SLLDTLR	816.471	Q3TLM9	Ppp4r1	Serine/threonine-protein phosphatase 4 regulatory subunit 1	2	0.02965	75.269	0	8199500	0	9406500	9634400	9517200	0	0	0	8
LYPVLQQCLVR	1387.76	Q8BTW3	Exosc6	Exosome complex component MTR3	2	0.0013674	86.833	8963400	8549300	10253000	10224000	5492400	9518800	0	0	0	8
LEGYWGEAQSLCQAVDEHLR	2360.09	Q6R891	Ppp1r9b	Neurabin-2	3	0.0002334	57.482	7118500	0	10141000	0	7121000	9553800	0	0	0	4
SDPPTLLTPSK	1154.62	Q3UG53	Stk10	Serine/threonine-protein kinase 10	2	0.021568	56.548	0	0	11311000	0	0	9564100	0	0	0	2
VPTQPTSGPVPTTQIQEASAEHPPAVAPR	2962.51	Q3U4K3	Ndufv3		3	0.032362	22.399	8848700	0	0	11563000	0	9573500	0	0	0	5
LECADLLEMR	1248.58	Q8BIP0	Dars2	Aspartate--tRNA ligase, mitochondrial	2	0.0024977	84.213	0	0	0	9106700	0	9578400	0	0	0	2
NATNVEQSFMTMAAEIKK	2011.97	Q5SW88	Rab1;Rab1A	Ras-related protein Rab-1A	3	0.02216	24.893	0	0	0	0	0	9583300	0	0	0	2
GLSNLFLSCPIPK	1444.77	Q8BVQ5	Ppme1	Protein phosphatase methylesterase 1	2	0.010456	57.348	0	0	0	0	4369700	9589400	0	0	0	2
AAQPTDDPLSLLDPLWTLNKT	2308.2	Q6PB44	Ptpn23	Tyrosine-protein phosphatase non-receptor type 23	2	0.020655	57.679	8636300	0	6306600	0	0	9610400	0	0	0	4
AELVCLSGPHPVPEAAAPEGSCPDSGPCSPEEQPR	3683.63	Q9D7E3	Ovca2	Ovarian cancer-associated gene 2 protein homolog	3	0.01285	26.476	7250500	0	9896300	10092000	6547600	9624300	0	0	0	8
FGPCPTLWASLEPVSVDTAR	2202.08	Q6P9Q4	Fhod1	FH1/FH2 domain-containing protein 1	2	7.81e-05	86.291	9129100	0	11420000	14770000	6524500	9649700	0	0	0	6
IYEVCSNGPAPTESQPTDDYVLGEEEEEEEEELQR	4069.74	Q3U169	Irf5	Interferon regulatory factor 5	3	0.04785	13.343	0	0	0	0	0	9669200	0	0	0	2
LALTTSGCPLVIQCK	1659.87	L8AZD2	Mtmr6	Myotubularin-related protein 6	2	9.91e-05	84.658	0	0	0	0	0	9682800	0	0	0	3
TDSQDLVASFR	1237.59	Q8BX09	Rbbp5	Retinoblastoma-binding protein 5	2	0.00099839	85.533	9210600	8669200	12183000	10019000	0	9687200	0	0	0	6
FLSYALIDPTHEGTAEGMENMADAVTHAR	3146.44	Q6A099	Gbf1		4	0.039436	21.467	5165400	0	8684100	7752200	0	9704100	0	0	0	6
ISAAASDSGVESFDEGSSH	1851.78	Q3U2Z5	Eps8	Epidermal growth factor receptor kinase substrate 8	2	0.00082882	57.019	0	0	0	0	6811900	9748000	0	0	0	2
EAAQCVGDEFMNCK	1657.65	Q3U0I9	Snx8	Sorting nexin-8	2	0.0082047	57.149	0	8906400	7490400	7043600	0	9774200	0	0	0	4
IPEGSAVPATDAAPK	1422.74	A2A6U3	2018-09-09	Septin-9	2	0.058003	39.266	0	0	0	9013800	0	9798700	0	0	0	2
FEQAFYTYDTSSPSILTLTAIR	2523.25	Q6GQT9	Nomo1	Nodal modulator 1	2	9.85e-11	107.07	0	9640800	0	0	0	9806500	0	0	0	4
LLPVLIHTFWIDAK	1664.97	Q8R5C0	Mtx1	Metaxin-1	3	0.00058988	57.804	0	0	0	0	0	9823000	0	0	0	3
LHISPSNMTNQNTPEYMEK	2233.01	P70288	Hdac2	Histone deacetylase 2	3	5.24e-07	68.567	10662000	0	0	16050000	0	9824200	0	0	0	3
FLLVGQTMPTSLDEDLTK	2007.02	E9PV45	Usp24	Ubiquitin carboxyl-terminal hydrolase;Ubiquitin carboxyl-terminal hydrolase 24	2	4.34e-06	83.314	0	9262800	8570000	0	5524600	9852600	0	0	0	5
FLGAPNLPVYTVDCSSSGTSILTGSPIQVQNIK	3462.77	Q6P5D8	Smchd1	Structural maintenance of chromosomes flexible hinge domain-containing protein 1	3	0.0094908	28.443	12809000	0	0	0	13363000	9923300	0	0	0	3
GWIDWAASK	1032.5	Q544I1	Ndrg3	Protein NDRG3	2	0.033073	58.981	12193000	9315900	0	0	0	9931400	0	0	0	3
LFEPLVIK	957.59	G3X9H5	Htt	Huntingtin	2	0.047313	58.819	0	6782000	0	0	0	9966200	0	0	0	2
QYTMELER	1068.49	Q8CGY8	Ogt	UDP-N-acetylglucosamine--peptide N-acetylglucosaminyltransferase 110 kDa subunit	2	0.082461	49.418	8722500	0	12205000	0	0	9983200	0	0	0	3
QLLLTPSAVVIVEDAK	1694.98	Q9WTI7	Myo1c	Unconventional myosin-Ic	2	3.52e-05	87.001	0	7355100	6957400	0	9520400	9983600	0	0	0	4
EEGGENRDQAQEDAQEIADTPSGDK	2688.14	F8WIT2	Anxa6	Annexin	3	0.042521	17.943	0	9076400	0	0	0	9987800	0	0	0	3
DGLQLAADIASLQTR	1570.83	Q8VE99	Ccdc115	Coiled-coil domain-containing protein 115	3	0.01833	30.072	0	8277600	7616400	11334000	8721800	9998900	0	0	0	5
VMVAEALDISR	1202.63	Q9Z2I8	Suclg2	Succinyl-CoA ligase [GDP-forming] subunit beta, mitochondrial;Succinyl-CoA ligase subunit beta	2	0.00020248	99.653	18248000	17096000	14295000	11094000	10074000	10010000	0	0	0	12
GSLSSCLQEGLIPGSQFWDATK	2380.14	Q8C2N9	Msh6	DNA mismatch repair protein Msh6	3	0.065839	17.762	13283000	8463900	11250000	0	0	10019000	0	0	0	4
CAEGYALYAQALTDQQQFGK	2261.04	Q3TSX8	Tomm70a	Mitochondrial import receptor subunit TOM70	2;3	1.05e-05	88.075	0	13437000	0	0	7953500	10022000	0	0	0	3
LCASGAGAAPDPAVEEIR	1782.86	Q9R060	Nubp1	Cytosolic Fe-S cluster assembly factor NUBP1	2	0.00035373	81.494	9636600	0	10577000	8779400	7995300	10045000	0	0	0	6
FDREVDIGIPDATGR	1659.82	Q01853	Vcp	Transitional endoplasmic reticulum ATPase	2	0.044176	59.306	0	0	0	0	0	10071000	0	0	0	2
IPALLNTQPMLQLEYTATDR	2287.19	P19096	Fasn	Fatty acid synthase;[Acyl-carrier-protein] S-acetyltransferase;[Acyl-carrier-protein] S-malonyltransferase;3-oxoacyl-[acyl-carrier-protein] synthase;3-oxoacyl-[acyl-carrier-protein] reductase;3-hydroxyacyl-[acyl-carrier-protein] dehydratase;Enoyl-[acyl-carrier-protein] reductase;Oleoyl-[acyl-carrier-protein] hydrolase	2	3.97e-05	97.86	0	9381100	0	8691400	0	10110000	0	0	0	3
RGDIIGVEGNPGK	1310.69	Q8C292	Kars	Lysine--tRNA ligase	3	0.0015946	56.482	0	0	12854000	0	9619100	10131000	0	0	0	4
SMQDAELLVK	1132.58	B1ARU4	Macf1	Microtubule-actin cross-linking factor 1	2	0.011281	63.419	9707000	9583900	13752000	12858000	9884100	10136000	0	0	0	6
AVEDTEAQGFAGLFAAYTDHPPPFR	2706.27	Q69ZI9	Vps18	Vacuolar protein sorting-associated protein 18 homolog	3	0.001636	41.491	7303600	0	0	0	0	10139000	0	0	0	4
EEEMDDMDRDLGDEYGWK	2231.86	Q571B0	Tm9sf3	Transmembrane 9 superfamily member 3	2	5.28e-05	80.469	0	0	13250000	0	0	10139000	0	0	0	2
IASGLGLAWIIGR	1325.78	Q9CPU4	Mgst3	Microsomal glutathione S-transferase 3	2	1.07e-06	119.68	0	9457100	0	0	0	10141000	0	0	0	4
LTEQSNTPLLLPLSAR	1751.98	Q3TRG2	Zak		2	0.00077158	65.395	0	7971500	0	0	7888000	10157000	0	0	0	3
NEDVEALQQQQTR	1557.74	Q9JJC6	Rilpl1	RILP-like protein 1	2	0.018377	50.207	0	17823000	0	0	22132000	10182000	0	0	0	3
TGETMIQWSQFK	1454.69	Q0VGB7	Ppp4r2	Serine/threonine-protein phosphatase 4 regulatory subunit 2	2	0.013897	57.348	0	0	0	9505500	0	10192000	0	0	0	3
VYTLSDTIAR	1137.6	Q14DS6	Lars2	Probable leucine--tRNA ligase, mitochondrial	2	0.0019205	88.37	10954000	10850000	0	9089800	6728800	10199000	0	0	0	5
CPVAMEEADDNVAPSSTFCK	2226.92	J3QNU6	Arrb1	Beta-arrestin-1	2	5.6e-18	124.62	11622000	14646000	16519000	12884000	0	10222000	0	0	0	4
AQILVLTYPLIGNYGIPSDEEDEFGLSK	3080.56	E9QAI5	Cad	CAD protein;Glutamine-dependent carbamoyl-phosphate synthase;Aspartate carbamoyltransferase;Dihydroorotase	2;3	0.00023329	45.901	9550300	0	32151000	24689000	18662000	10227000	0	0	0	8
EYLEFFR	1002.48	D3YVF8	Zbtb7a	Zinc finger and BTB domain-containing protein 7A	2	0.05153	62.714	0	6229600	0	0	0	10268000	0	0	0	2
EVPSEVSEEPTK	1329.63	Q3TNS3	Uri1	Unconventional prefoldin RPB5 interactor	2	0.0025285	75.509	13475000	9242500	0	10542000	6302200	10278000	0	0	0	2
NADGSIQYLPIQLLAQPTAACR	2399.23	E9QKV6	Myo9b	Unconventional myosin-IXb	2	4.47e-05	65.092	7225900	11062000	0	0	0	10343000	0	0	0	3
IGLAELHPDVFATAPR	1705.92	Q9DCU6	Mrpl4	39S ribosomal protein L4, mitochondrial	2;3	0.00025762	60.209	0	33163000	12041000	0	0	10349000	0	0	0	4
LDSSQLPLQTGLDVPATPR	2007.06	Q8CJF7	Ahctf1	Protein ELYS	2	0.0028604	47.189	0	8832600	8774400	9279000	0	10365000	0	0	0	5
VPGSVGTPLPGVEVR	1462.81	Q3URE1	Acsf3	Acyl-CoA synthetase family member 3, mitochondrial	2	0.001531	64.121	0	11647000	11351000	0	0	10383000	0	0	0	4
TLVSTVGSMVFSEGEAQR	1896.93	A2AVJ7	Rrbp1	Ribosome-binding protein 1	2	0.00010598	90.926	0	9698900	0	0	0	10438000	0	0	0	2
ALSTTASTAAFDK	1282.64	Q8BN64	Eefsec	Selenocysteine-specific elongation factor	2	0.001155	76.143	0	8529900	10449000	0	0	10440000	0	0	0	2
LMISAGQLTLPMEAGLVEFSK	2234.17	Q8BYI6	Lpcat2	Lysophosphatidylcholine acyltransferase 2	2	0.00060537	74.789	0	0	0	0	7419000	10444000	0	0	0	2
QQEIVVSR	957.524	B2RSV4	Sf3b3	Splicing factor 3B subunit 3	2	0.0073601	94.114	0	14412000	19254000	0	15548000	10458000	0	0	0	4
LIGQHLNGLGLNQTVDLLMQESGCR	2765.4	E0CYH4	Wdr26	WD repeat-containing protein 26	3	5.3e-05	34.817	8251900	6093700	0	0	0	10459000	0	0	0	3
LFIEYPTGSGNVYSSASGVAK	2146.06	Q8K3X4	Irf2bpl	Interferon regulatory factor 2-binding protein-like	2	0.0005667	55.314	7002000	8562200	10053000	7937600	0	10475000	0	0	0	12
LVSPLASPVDEIK	1366.77	Q8CJF7	Ahctf1	Protein ELYS	2	0.020045	58.676	12583000	9161600	10203000	0	0	10498000	0	0	0	4
ENAGVDPTLTIPMIQK	1725.9	Q56A08	Gpkow	G patch domain and KOW motifs-containing protein	2	0.0061239	51.957	0	0	12266000	13823000	0	10564000	0	0	0	3
VTAPQPAANGDLASR	1466.75	H3BKB1	Atp2c1	Calcium-transporting ATPase;Calcium-transporting ATPase type 2C member 1	2	0.0090895	52.693	0	0	0	13322000	0	10571000	0	0	0	2
LTHGDSPSEAPVGPLGQVK	1887.97	Q3U7R1	Esyt1	Extended synaptotagmin-1	2	1.8e-05	77.185	0	0	0	0	0	10575000	0	0	0	2
ANIVHLMLSSPEQIQK	1806.97	Q9ERK4	Cse1l	Exportin-2	3	0.051106	27.488	0	0	0	0	4376600	10586000	0	0	0	2
IAGAPEPLTVTAPSLTIAENMADLIDGYCR	3158.56	K7Q751	Ptk2	Focal adhesion kinase 1	3	1.67e-09	52.685	0	5607100	9818100	11627000	7349800	10590000	0	0	0	5
EDIYAVEIVGGATR	1491.76	Q3U2G2	Hspa4	Heat shock 70 kDa protein 4	2	2.14e-05	101.93	19323000	10309000	0	0	0	10591000	0	0	0	7
SMTLLNTMDR	1180.56	Q99L69	Bckdha	2-oxoisovalerate dehydrogenase subunit alpha, mitochondrial	2	0.00024439	112.84	11348000	15738000	0	11587000	0	10604000	0	0	0	3
QAPEWTEEDLSQLTR	1801.85	F6ZL86	Dnajc1	DnaJ homolog subfamily C member 1	2	0.00045361	75.78	0	12132000	10421000	0	8944000	10618000	0	0	0	6
MALLATVLGR	1043.62	E9QAI5	Cad	CAD protein;Glutamine-dependent carbamoyl-phosphate synthase;Aspartate carbamoyltransferase;Dihydroorotase	2	0.0001892	117.04	6528900	8869800	8588400	6726100	0	10621000	0	0	0	6
MALLASNSCFIR	1381.68	Q3V3M3	Frg1	Protein FRG1	2	4.52e-05	96.331	12841000	7239100	9579000	9505000	7812800	10621000	0	0	0	6
NGEFFMSPHDFVTR	1682.75	Q8C140	Slc25a13	Calcium-binding mitochondrial carrier protein Aralar2	3	0.055874	22.154	0	5674700	12947000	0	0	10623000	0	0	0	3
QELPALQQNQSDLK	1610.83	B1ARU4	Macf1		2	0.0027835	72.006	11435000	0	10189000	13159000	0	10638000	0	0	0	2
TFPFSEVPEAFLK	1510.77	D3Z792	Rtn4ip1	Reticulon-4-interacting protein 1, mitochondrial	2	0.0034229	64.82	0	15217000	18785000	15544000	0	10656000	0	0	0	5
SPLGSPIYHNTEDLSWPGSAQDSNLEAQYR	3331.54	Q14AA1	Dok3	Docking protein 3	3	0.075851	9.97	0	0	0	9773500	5820100	10678000	0	0	0	3
SPEELAALVK	1055.59	Q3UIH7	Rabggta	Geranylgeranyl transferase type-2 subunit alpha	2	0.04131	52.591	11908000	0	0	0	0	10679000	0	0	0	2
DDGDEEGLLTHSEEELEHSQDTDAEDGALQ	3283.34	Q3U3F6	Raly	RNA-binding protein Raly	3	0.094745	5.3197	0	0	0	0	0	10761000	0	0	0	2
LWTHTSDQQVSAISNPSPCASVTAEGK	2870.35	Q8VCB1	Ndc1	Nucleoporin NDC1	3	0.060878	8.2867	5090900	0	0	12411000	0	10781000	0	0	0	3
VTLLEGDHVR	1137.61	Q3U1S6	Csde1	Cold shock domain-containing protein E1	2	0.00013877	120.87	0	0	19942000	20079000	15664000	10797000	0	0	0	7
AIIDAIEEFVQK	1374.74	B2RSI3	Parp14	Poly [ADP-ribose] polymerase 14	2	0.00033504	105.2	0	0	0	0	0	10798000	0	0	0	3
TILTLTGVSSLEDVK	1574.88	Q8CHP8	Pgp	Phosphoglycolate phosphatase	2	0.0013626	84.352	13317000	12388000	7998400	9995900	0	10801000	0	0	0	3
LSQTASEDSDVFGEADAIQNNGTSAEDTAVTDSK	3472.52	Q5D096	Mbp	Myelin basic protein	3	0.068774	8.6177	0	10758000	0	18252000	8662400	10804000	0	0	0	6
ILSDEEKPVFGPLPCR	1855.95	Q3UPU3	Ubr2	E3 ubiquitin-protein ligase UBR2	3	0.044237	21.666	0	0	0	0	4247700	10819000	0	0	0	2
VLQDLQLDQENQQDLLK	2039.05	F6VG18	Lztfl1	Leucine zipper transcription factor-like protein 1	2	0.016305	63.944	6217900	0	8505100	7670700	0	10828000	0	0	0	4
LLFEYLR	952.538	G5E823	Hars2	Probable histidine--tRNA ligase, mitochondrial	2	0.046161	64.803	0	0	10752000	0	0	10835000	0	0	0	3
LAEPQNQGNSQVLLDAPIQLSK	2362.25	Q8K268	Abcf3	ATP-binding cassette sub-family F member 3	2;3	0.023812	31.389	0	0	6888800	15534000	0	10858000	0	0	0	4
AEMNGLAAQGR	1116.53	P05063	Aldoc	Fructose-bisphosphate aldolase C	2	0.000889	87.181	0	18026000	0	12173000	8712300	10872000	0	0	0	4
IFQGNVHNFEK	1331.66	Q6PE01	Snrnp40	U5 small nuclear ribonucleoprotein 40 kDa protein	2	0.016001	59.153	0	0	0	0	11745000	10877000	0	0	0	3
APDVDIKGPNVDIK	1479.79	E9Q616	Ahnak		3	0.030298	28.986	0	0	19126000	0	0	10878000	0	0	0	5
LLVPSLMK	899.551	Q6NWW1	Ube4b;mKIAA0684	Ubiquitin conjugation factor E4 B	2	0.024422	68.787	9545600	0	10086000	0	0	10879000	0	0	0	2
AQNIMQSFENPFR	1580.74	Q8K366	Exosc10	Exosome component 10	2	1.58e-06	116.23	9834600	8388200	13398000	0	6280200	10887000	0	0	0	5
LCDLYYVNSPELELEELNAK	2411.16	Q8R2U8	Pdk1	[Pyruvate dehydrogenase (acetyl-transferring)] kinase isozyme 1, mitochondrial	2	0.00020899	62.14	7455300	8253300	12530000	0	9810900	10895000	0	0	0	9
GIFPSGLFQGDTFR	1540.77	P22682	Cbl	E3 ubiquitin-protein ligase CBL	2	0.00018399	87.184	0	10976000	0	12864000	9259800	10926000	0	0	0	6
LPVEILGR	895.549	Q5JC28	Eps15	Epidermal growth factor receptor substrate 15	2	0.012054	82.671	8542600	9368900	10580000	9906700	9955400	10934000	0	0	0	6
IMENNLESELK	1318.64	E9PX48	Dock7	Dedicator of cytokinesis protein 7	2	0.00132	80.688	0	10875000	0	11002000	0	10963000	0	0	0	2
AEEITIPADVTPEK	1511.77	Q8JZN7	Rhot2	Mitochondrial Rho GTPase 2	2	0.00059805	77.379	0	0	12473000	0	10523000	10964000	0	0	0	3
TNVALMCMLR	1207.59	Q6P4T2	Snrnp200	U5 small nuclear ribonucleoprotein 200 kDa helicase	2	0.033056	55.567	0	10713000	0	0	0	10995000	0	0	0	2
GEIDAHEDSFK	1246.55	B7ZWK3	Sptan1	Spectrin alpha chain, non-erythrocytic 1	3	0.0031589	62.408	9601600	0	0	9504200	0	10995000	0	0	0	3
LLGPSAAADILQLSSSLPLQSR	2236.24	Q4JG03	Huwe1	E3 ubiquitin-protein ligase HUWE1	2	5.77e-07	112.5	11052000	10209000	9699100	11263000	9141800	10995000	0	0	0	8
PLMGLGQADKDEGPGDPSQEAGTQGR	2610.2	Q80UU6	Ogfr	Opioid growth factor receptor	3	2.27e-07	71.54	0	0	0	0	11247000	11014000	0	0	0	2
VIQPLVQQPILPVVK	1670.05	E9Q640	Rbm26	RNA-binding protein 26	2	9.1e-05	85.807	9251900	9424700	0	11507000	8277100	11017000	0	0	0	3
HGINCFINR	1129.55	Q542X7	Cct2	T-complex protein 1 subunit beta	2	0.048606	58.917	0	0	0	10291000	13459000	11048000	0	0	0	2
TYSLDLDGGSEYK	1446.65	Q8JZY1	Ftsj1	Putative tRNA (cytidine(32)/guanosine(34)-2-O)-methyltransferase	2	0.004778	62.466	0	0	11166000	9583600	8258700	11089000	0	0	0	4
QGFDFLCMPVFHPR	1749.81	Q8CIG8	Prmt5	Protein arginine N-methyltransferase 5	3	0.0016585	44.511	0	0	8349600	0	0	11093000	0	0	0	3
VLSQTVPSSGTNGVSMPADCTGPATSVSPENLTQR	3544.68	Q9CT10	Ranbp3	Ran-binding protein 3	3	0.067888	8.5029	8127100	5849600	0	0	0	11128000	0	0	0	3
QWLLFEMSK	1180.6	Q545Y5	Cd74	H-2 class II histocompatibility antigen gamma chain	2	0.016646	65.465	8337400	0	0	0	0	11143000	0	0	0	3
LEATSAIEEDEMQPYASYTEK	2404.06	Q9ES57	Cd200r1	Cell surface glycoprotein CD200 receptor 1	2	0.00089106	49.929	5725300	0	0	0	6664800	11147000	0	0	0	3
SILLSVPLLVVDNK	1508.92	Q8BTF0	Copa	Coatomer subunit alpha;Coatomer subunit alpha;Xenin;Proxenin	3	0.00083863	66.533	0	5598400	8094800	0	9033900	11155000	0	0	0	6
DVPFSIVYFPLFANLNQLGRPSSEEK	2966.52	Q9D6M3	Slc25a22	Mitochondrial glutamate carrier 1	3	3.54e-07	67.217	0	0	0	0	0	11255000	0	0	0	3
LLGNMPENAQIDDDLFDK	2046.96	E9PWG6	Ncapg		2	0.00014121	69.716	11465000	10346000	13961000	17937000	0	11265000	0	0	0	8
YSPTSPTYSPTTPK	1525.73	O08847	Polr2a	DNA-directed RNA polymerase;DNA-directed RNA polymerase II subunit RPB1	2	0.0014397	71.555	11966000	11770000	0	10702000	0	11279000	0	0	0	5
LPVLTCTLQLR	1312.75	Q99K01	Pdxdc1	Pyridoxal-dependent decarboxylase domain-containing protein 1	2	0.0066351	64.04	4689100	0	0	7780600	8420200	11311000	0	0	0	4
RPQYSNPPVQGEVMENADNQGAGEQGR	2927.32	Q60950	Ybx1		4	0.0090657	30.337	0	0	0	0	0	11319000	0	0	0	3
CYLVTGEVQK	1195.59	Q9Z0W3	Nup160	Nuclear pore complex protein Nup160	2	0.019552	63.419	10308000	8198700	0	9764800	7410800	11346000	0	0	0	2
IIEAMGFTGPLK	1275.69	D6RJ83	Uqcc1	Ubiquinol-cytochrome-c reductase complex assembly factor 1	2	0.00035938	100.48	13472000	11248000	16687000	0	0	11387000	0	0	0	4
SSGLTNGILDEKDIVEESPR	2158.08	Q3TK27	Gnl3	Guanine nucleotide-binding protein-like 3	3	0.00016021	47.499	12294000	0	0	0	13352000	11398000	0	0	0	3
DAAIYLVTSLASK	1350.74	Q9ERK4	Cse1l	Exportin-2	2	0.0012446	75.695	0	0	0	0	10598000	11400000	0	0	0	4
LINEPSNDWDIYYWATEAK	2327.07	Q8C6I2	Sdhaf2	Succinate dehydrogenase assembly factor 2, mitochondrial	2	6.69e-10	105.78	11279000	0	0	0	13386000	11403000	0	0	0	4
GVLFQPCER	1104.54	Q91ZX7	Lrp1	Prolow-density lipoprotein receptor-related protein 1;Low-density lipoprotein receptor-related protein 1 85 kDa subunit;Low-density lipoprotein receptor-related protein 1 515 kDa subunit;Low-density lipoprotein receptor-related protein 1 intracellular domain	2	0.0038511	89.296	15128000	13741000	0	20962000	0	11407000	0	0	0	6
AGPPVPASHIAPTPVQPPMIR	2132.16	E9QAQ7	Arid1a	AT-rich interactive domain-containing protein 1A	3	1.05e-05	53.037	0	10979000	16577000	16833000	0	11420000	0	0	0	7
NYVDQYSEVCVQMLMHMQPK	2499.11	Q3TWM9	Psap		3	0.0033531	43.326	10557000	11113000	24972000	0	0	11442000	0	0	0	6
LSVPEPDADFDAR	1430.67	Q3TBD3	Emilin2	EMILIN-2	2	0.023921	47.302	0	0	0	0	9831200	11449000	0	0	0	2
AMWPDGQQDITEVTK	1717.8	Q5SUA5	Myo1g	Unconventional myosin-Ig	2	0.001531	64.121	10843000	15048000	12448000	0	0	11454000	0	0	0	4
SEDFQNSVWSGPAGR	1635.73	Q8C0D5	Eftud1	Elongation factor Tu GTP-binding domain-containing protein 1	2	0.00046145	75.695	12353000	0	0	0	0	11480000	0	0	0	3
LATAMQEGEYDAERPPSKPPPVELR	2780.38	Q3TB96	Dctn1	Dynactin subunit 1	4	0.0029132	38.67	0	0	10761000	0	0	11492000	0	0	0	2
ILQGAPETLDR	1211.65	Q8BIW1	Prune	Protein prune homolog	2	0.0035769	72.928	14961000	14259000	0	0	9831600	11497000	0	0	0	3
LDALEWESCFNK	1510.68	Q6A099	Gbf1		2	3.49e-05	99.973	13337000	0	12982000	13129000	0	11513000	0	0	0	5
LNLSVTTPYNADFDGDEMNLHLPQSLETR	3289.56	O08847	Polr2a	DNA-directed RNA polymerase;DNA-directed RNA polymerase II subunit RPB1	3	0.054056	15.773	0	9402900	9647900	11099000	0	11516000	0	0	0	4
GYVVPNVDLPPLCSSR	1771.89	Q3TEB9	Exosc8	Exosome complex component RRP43	2	0.022139	54.776	9198300	0	11333000	0	7057600	11537000	0	0	0	4
QGNGPVLVCAPSNIAVDQLTEK	2309.17	Q9EPU0	Upf1	Regulator of nonsense transcripts 1	2	4.89e-05	63.709	0	9843300	0	0	10207000	11541000	0	0	0	3
AVESIQAEDESAK	1375.65	Q9CVN2	Maea	Macrophage erythroblast attacher	2	2.32e-06	111.27	14875000	14826000	15450000	0	0	11572000	0	0	0	5
YPSLQVIGGNVVTAAQAK	1814.99	Q3UAT9	Impdh2	Inosine-5-monophosphate dehydrogenase;Inosine-5-monophosphate dehydrogenase 2	2	0.0011658	58.32	0	0	10747000	0	12916000	11590000	0	0	0	3
IGLFADIELSR	1232.68	Q3U6N7	Lcp1;Pls3	Plastin-2;Plastin-3	2	4.63e-05	94.309	0	75792000	48746000	0	0	11594000	0	0	0	2
DFAETHIK	959.471	Q6PB66	Lrpprc	Leucine-rich PPR motif-containing protein, mitochondrial	2	0.058612	57.281	0	0	0	0	0	11605000	0	0	0	4
FCLICNYVSR	1330.62	Q3UI84	Rfc4	Replication factor C subunit 4	2	0.015827	61.78	16106000	12609000	15502000	14341000	13615000	11622000	0	0	0	7
IVIWDFLTR	1161.65	Q8BX09	Rbbp5	Retinoblastoma-binding protein 5	2	0.015733	66.692	0	0	16853000	12379000	0	11623000	0	0	0	3
VDALGEALQTTVSR	1458.77	Q8BGG7	Ubash3b	Ubiquitin-associated and SH3 domain-containing protein B	2	0.00307	62.924	0	0	13037000	0	7062500	11632000	0	0	0	3
NVMVVSCVCPSSEK	1594.72	Q0VGB7	Ppp4r2	Serine/threonine-protein phosphatase 4 regulatory subunit 2	2	0.0012812	72.652	9019200	15201000	8319800	18564000	6358400	11639000	0	0	0	6
TAFGTSTTGFGTNPGGLFGQQNQQTTSLFSK	3179.52	Q6PFD9	Nup98	Nuclear pore complex protein Nup98-Nup96;Nuclear pore complex protein Nup98;Nuclear pore complex protein Nup96	3	0.032184	21.317	0	0	10300000	10033000	8374600	11651000	0	0	0	6
NTSTINNGTPQQAQSMAATIKPGDDWK	2873.36	P54823	Ddx6	Probable ATP-dependent RNA helicase DDX6	3	0.082123	16.938	0	0	0	19834000	0	11683000	0	0	0	3
GAQFLTELAPLCK	1446.75	Q80ZQ9	Fam206a	Protein Simiate	2	0.0025836	69.01	9276300	8994900	0	0	0	11686000	0	0	0	3
DIDASPSPLSVQDLK	1583.8	Q8CH02	Sugp1	SURP and G-patch domain-containing protein 1	2	6.64e-05	89.301	13309000	11270000	15071000	17504000	0	11689000	0	0	0	4
NIVWIAECIAQR	1471.76	P51863	Atp6v0d1	V-type proton ATPase subunit d 1	2;3	0.00022851	88.417	7423100	0	5251200	0	7148900	11709000	0	0	0	5
DGNLANNPYSGDVTK	1563.72	A2AMY5	Ubap2	Ubiquitin-associated protein 2	2	0.0055944	78.705	0	0	0	15867000	7547300	11716000	0	0	0	3
VLECLASGIVMPDGSGIYDPCEK	2509.15	Q45VK5	Ilf3	Interleukin enhancer-binding factor 3	2	0.00040042	50.843	0	11046000	7749200	12430000	0	11732000	0	0	0	9
TESQLIVDNATR	1345.68	Q6NVF4	Helb	DNA helicase B	2	0.0025371	70.942	0	0	13123000	12354000	0	11736000	0	0	0	4
SEGEGEAATADGGAASVPGAGPK	1984.9	Q3UI43	Babam1	BRISC and BRCA1-A complex member 1	2	1e-05	72.417	14511000	0	8730800	10633000	7299400	11760000	0	0	0	8
GKEDEGEEAASPMLQIQR	1986.93	Q9JHU4	Dync1h1	Cytoplasmic dynein 1 heavy chain 1	2	1.61e-05	90.926	0	0	5947900	0	0	11779000	0	0	0	2
SIVSNNWALGGDPEER	1742.82	E9QAT4	Sec16a		2	0.00051119	76.522	9520500	0	10173000	0	6198600	11787000	0	0	0	4
VKPAPDETSFSEALLK	1730.91	Q3UXI9	Ilf2	Interleukin enhancer-binding factor 2	2	0.030114	58.674	0	0	10971000	0	8766200	11793000	0	0	0	6
SLDAPSWPGVYR	1346.66	Q6ZQH8	Nup188	Nucleoporin NUP188 homolog	2	0.0029394	80.688	0	0	11569000	11483000	0	11811000	0	0	0	2
EGLPLMVFANWR	1431.73	Q5SWU9	Acaca	Acetyl-CoA carboxylase 1;Biotin carboxylase	2	0.022519	64.04	0	0	11653000	10644000	0	11813000	0	0	0	4
EFQDYIEPEEGCQGSPQR	2167.91	Q6PDL0	Dync1li2	Cytoplasmic dynein 1 light intermediate chain 2	2	0.00029422	63.091	9387100	8389100	0	10289000	0	11827000	0	0	0	6
VLMASTSYLPSQVTEMFNQGR	2358.13	D3YWK1	Wipi2	WD repeat domain phosphoinositide-interacting protein 2	2;3	1.47e-05	56.54	0	7332800	0	0	0	11830000	0	0	0	2
FLNSGGFIGFAPTIHQIVR	2073.12	Q9R0E1	Plod3	Procollagen-lysine,2-oxoglutarate 5-dioxygenase 3	3	1.79e-05	62.765	0	0	0	0	8344900	11852000	0	0	0	4
TVGVEPAADGK	1042.53	Q5M9N5	Rpl28	60S ribosomal protein L28	2	1.1e-06	134.25	13238000	14665000	18935000	0	0	11884000	0	0	0	9
NMAVLDPPDADHLYSAK	1855.88	Q8CH18	Ccar1	Cell division cycle and apoptosis regulator protein 1	2;3	0.012162	38.634	0	0	9063800	0	0	11912000	0	0	0	2
ITITNDQNR	1073.55	Q3U9G2	Hspa5	78 kDa glucose-regulated protein	2	2e-06	167.24	0	0	0	11143000	0	11920000	0	0	0	2
GDIQPQLDSALQDVNDK	1854.9	G3X9H7	Mtss1	Metastasis suppressor protein 1	2	0.025092	42.209	0	21008000	0	0	0	11934000	0	0	0	2
TTPDVIFVFGFR	1397.73	Q9D7P1	Rps24	40S ribosomal protein S24	2	0.0053271	62.823	0	0	0	0	0	11942000	0	0	0	2
SVTASAPGSENLTLIQQEVDALEELSR	2856.44	Q8BS95	Gpr89a	Golgi pH regulator	3	0.0016069	36.577	8451900	0	15186000	0	11037000	11946000	0	0	0	5
ETEEESETPVEADLTEK	1934.85	Q3UKM9	Mta3	Metastasis-associated protein MTA3	2	0.00051687	62.924	9640300	0	10330000	9760700	11106000	12055000	0	0	0	10
DFVAQNNTMQIK	1407.68	Q8CCX6	Vac14	Protein VAC14 homolog	2	0.00019486	90.15	14989000	15164000	16120000	12693000	0	12058000	0	0	0	6
ICNYVGPAK	1020.51	P25799	Nfkb1	Nuclear factor NF-kappa-B p105 subunit;Nuclear factor NF-kappa-B p50 subunit	2	0.038761	57.281	0	0	0	0	9964800	12060000	0	0	0	2
EELSSGDSLSPDPWK	1645.75	E9Q852	Mllt4	Afadin	2	5.93e-12	132.76	0	0	0	13100000	0	12112000	0	0	0	4
DQPDYGVYSR	1198.53	Q8C3J5	Dock2	Dedicator of cytokinesis protein 2	2	0.0051416	75.378	0	14644000	0	13026000	0	12116000	0	0	0	3
EEAQAGEQDLNHEAAADPAPSPPNDFQNNVQVK	3529.6	Q922S5	Os9	Protein OS-9	3	0.047424	14.483	0	0	0	0	0	12150000	0	0	0	2
SIYDDISSPGLGSTPLTSR	1964.97	Q8R4R6	Nup35	Nucleoporin NUP53	2	2.24e-06	82.069	10365000	12592000	0	16014000	10335000	12192000	0	0	0	6
LYHDPNVNGGTELEPVEGNPYR	2469.16	Q569X8	Nup107	Nuclear pore complex protein Nup107	3	1.87e-05	52.03	10423000	0	14883000	12951000	8077800	12197000	0	0	0	5
SLGVGYAAVDNPIFYKPNTAMLLGDAK	2824.45	Q922E1	Nnt	NAD(P) transhydrogenase, mitochondrial	3	0.0030974	23.74	0	8877000	7317100	8844100	11138000	12199000	0	0	0	6
LGTLAPFCCPWEQLTR	1947.93	Q9D4G5	Pop1		2	0.0006145	68.44	14570000	13337000	11253000	15220000	9106500	12200000	0	0	0	8
TPDQIMELFDSITYSK	1886.9	Q3UP74	Anpep	Aminopeptidase N	2	5.87e-05	79.466	0	14319000	0	0	0	12206000	0	0	0	2
AQLSQYFDAVK	1268.64	Q3UKQ3	Wbp11	WW domain-binding protein 11	2	0.0014367	79.148	0	0	13819000	13427000	0	12219000	0	0	0	4
IEYADCVGEDLLQASR	1837.85	E9Q7N5	Gfm2	Ribosome-releasing factor 2, mitochondrial	2	2.56e-06	107.37	0	0	12844000	11661000	0	12228000	0	0	0	4
ITFPGCFTNSCCSHPLSNPGELEENNAIGVK	3448.55	P58044	Idi1	Isopentenyl-diphosphate Delta-isomerase 1	3	0.074113	9.6275	0	0	8709000	0	0	12231000	0	0	0	2
YEESDLGLLEGGVGDSR	1794.83	Q91WC0	Setd3	Histone-lysine N-methyltransferase setd3	2	0.00028994	67.115	0	9428500	0	13524000	0	12264000	0	0	0	3
NIGVVVVGFPATPIIESR	1867.06	Q542D6	Sptlc2	Serine palmitoyltransferase 2	2	2e-24	162.6	0	0	0	0	12696000	12267000	0	0	0	2
NLSFDELYPLGAEK	1594.79	Q8CJF7	Ahctf1	Protein ELYS	2	0.00087506	90.685	0	12552000	0	0	0	12299000	0	0	0	2
MIFEDEKPALLSQIDAEFQK	2351.17	Z4YL78	Ckap5	Cytoskeleton-associated protein 5	3	0.00026541	47.047	6840800	5943400	0	0	0	12355000	0	0	0	3
PMSMDNMLLGPVK	1431.69	Q545Y5	Cd74	H-2 class II histocompatibility antigen gamma chain	2	0.00012201	92.538	0	7160300	0	0	0	12373000	0	0	0	2
QLQSDLYGK	1050.53	Q8BL66	Eea1	Early endosome antigen 1	2	0.0035781	90.37	11172000	9689300	0	0	11433000	12396000	0	0	0	4
GDLENAFLNLVQCIQNK	1974.98	Q542G9	Anxa2	Annexin;Annexin A2	2;3	3.68e-12	161.62	0	0	0	0	27295000	12406000	0	0	0	3
VVTIAPGLFATPLLTTLPEK	2080.22	Q99N15	Hsd17b10	3-hydroxyacyl-CoA dehydrogenase type-2	2;3	6.77e-05	89.629	0	6812500	0	0	33724000	12435000	0	0	0	4
LGALSGAGALGLASYGAHGAQFPDAYGK	2619.31	Q5F285	Tmem256	Transmembrane protein 256	3	0.0018963	32.083	0	12206000	0	0	0	12439000	0	0	0	2
CEAMDLEISQLQK	1563.73	Q78UK8	Gbp7		2	0.00037048	84.658	0	0	0	0	11365000	12464000	0	0	0	2
NSLPVPVLETYNSCDAPPPLNNLSPYRDDGK	3441.65	Q8BH43	Wasf2	Wiskott-Aldrich syndrome protein family member 2	3	0.0086255	30.352	0	0	0	14431000	0	12506000	0	0	0	6
TNLLQVCER	1131.57	Q64727	Vcl	Vinculin	2	0.0044605	86.898	0	16328000	20249000	0	0	12519000	0	0	0	2
IPLLLTSLSFK	1230.76	Q6NS46	Pdcd11	Protein RRP5 homolog	2	0.00029096	103.7	9646100	9711800	9521600	5380100	0	12519000	0	0	0	6
VYYVSEMMLK	1261.61	E9Q109	Nip7	60S ribosome subunit biogenesis protein NIP7 homolog	2	0.010727	64.42	0	9058700	0	0	7967700	12552000	0	0	0	3
VPPEVMTAVDQALQEFGK	1957.98	Q3UVJ7	Decr2	Peroxisomal 2,4-dienoyl-CoA reductase	3	0.00020382	61.821	0	0	8894200	0	0	12565000	0	0	0	2
MCLAADVPLIESGTAGYLGQVTTIK	2607.33	Q9Z1F9	Uba2	SUMO-activating enzyme subunit 2	2	0.00016775	70.98	9278000	7096200	0	7568000	0	12574000	0	0	0	4
QQVDNVAQCHIQLAQTLR	2121.07	Q4FJU4	Pstpip2	Proline-serine-threonine phosphatase-interacting protein 2	3	0.0038396	45.257	0	0	0	0	0	12591000	0	0	0	3
ALLCCFSIPLTK	1421.74	Q9ES57	Cd200r1;Cd200r5	Cell surface glycoprotein CD200 receptor 1;Cell surface glycoprotein CD200 receptor 5	2	0.00037597	84.17	0	0	0	0	11120000	12596000	0	0	0	2
EAAPDTGAEPSPEDSDPTYSSK	2249.94	Q8VDP4	Ccar2	Cell cycle and apoptosis regulator protein 2	2	0.0079825	57.136	15131000	0	0	16475000	0	12621000	0	0	0	5
CGNEDCENVLNNLEECSQIK	2424	S4R1M0	Ptprc	Protein-tyrosine-phosphatase;Receptor-type tyrosine-protein phosphatase C	2	1e-09	99.481	0	0	0	0	0	12651000	0	0	0	2
AQETLQQLTSVLGLMESVK	2074.1	Q9DBG5	Plin3	Perilipin-3	2;3	5.8e-07	112.72	11787000	23935000	0	7553100	11954000	12660000	0	0	0	7
ELAIIQGPPGTGK	1279.71	Q8R151	Znfx1	NFX1-type zinc finger-containing protein 1	2	2.8e-05	101.38	0	0	0	0	0	12662000	0	0	0	3
ALTSVVNYR	1021.56	Q571A2	Cul2	Cullin-2	2	0.0034747	90.777	0	11531000	13470000	10296000	0	12662000	0	0	0	4
LLQMQPAQHGEIIR	1632.88	Q9Z1T1	Ap3b1	AP-3 complex subunit beta-1	3	0.051252	23.596	0	0	13847000	0	0	12682000	0	0	0	2
AVETPPMSSVNLLEGLSR	1898.98	Q6PAR5	Gapvd1	GTPase-activating protein and VPS9 domain-containing protein 1	2	9.49e-05	72.958	10718000	7935500	10312000	11745000	7876200	12686000	0	0	0	6
QPPIQSTAGAVPVR	1419.78	Q9CQU1	Mfap1	Microfibrillar-associated protein 1	2	0.0076222	70.977	13670000	14346000	9760000	10322000	11251000	12690000	0	0	0	6
ALLQEMPLTALLR	1467.85	Q8R562	Trove2	60 kDa SS-A/Ro ribonucleoprotein	2	0.00056492	99.568	17720000	21243000	19093000	21709000	0	12717000	0	0	0	7
LSNLALVKPEK	1210.73	Q564F6	Pdcd5	Programmed cell death protein 5	2	0.002632	100.88	0	0	15305000	15580000	11814000	12717000	0	0	0	5
SLLECSAEEIAGR	1433.68	Q3UPU3	Ubr2	E3 ubiquitin-protein ligase UBR2	2	0.0020834	71.03	14522000	0	0	0	0	12734000	0	0	0	8
GHTGFSSNSEHGTEAGQISEPGTATGEAGPSCSSASDK	3691.56	Q61074	Ppm1g	Protein phosphatase 1G	4	0.055193	12.061	8735800	0	0	0	7318600	12740000	0	0	0	3
LLQSVGQAPESISEK	1584.84	E0CZE0	Nae1	NEDD8-activating enzyme E1 regulatory subunit	2	0.00012504	80.979	10852000	12980000	0	0	7359100	12765000	0	0	0	5
GSGFGHNGVDGNGVGQSQAGSGSTPSEPHPVLEK	3246.49	Q3UNH5	Ythdf2	YTH domain-containing family protein 2	4	0.040769	16.512	0	0	0	19843000	0	12766000	0	0	0	2
YSLLPFWYTLFYQAHK	2076.05	Q8BHN3	Ganab	Neutral alpha-glucosidase AB	3	0.0014473	41.695	0	0	0	0	14215000	12788000	0	0	0	3
SADTPSAPSPPPTPAPVPVPLPPSVPAPVSVPK	3149.7	Q3U2Z5	Eps8	Epidermal growth factor receptor kinase substrate 8	3	0.035159	18.27	0	0	0	0	8106800	12806000	0	0	0	4
ANYISSAADNIR	1293.63	Q9QYE6	Golga5	Golgin subfamily A member 5	2	0.015151	57.174	0	6777800	0	10196000	0	12822000	0	0	0	4
PLIVFTPK	913.564	Q60597	Ogdh	2-oxoglutarate dehydrogenase, mitochondrial	2	0.0064266	95.352	9467400	9859900	9146800	0	0	12830000	0	0	0	5
GWAQLTDK	917.461	Q6P4T2	Snrnp200	U5 small nuclear ribonucleoprotein 200 kDa helicase	2	0.049306	58.286	0	0	0	0	8052100	12856000	0	0	0	2
AVLESNPDSPITITEPYR	2001.01	Q6KAS0	Gemin5		2	9.51e-07	92.856	9325100	9533000	0	0	0	12875000	0	0	0	5
ANGMGVIGQDGLLFK	1518.79	Q7TQK4	Exosc3	Exosome complex component RRP40	2	0.0010003	69.864	13094000	0	15481000	0	0	12945000	0	0	0	3
SILALVDGQPWDMYKPLTK	2174.14	Q8CCX9	Mrpl39	39S ribosomal protein L39, mitochondrial	3	0.0010833	40.349	8392300	0	11100000	8560400	9144200	12958000	0	0	0	6
AASVAENCINYQQGTPHK	1986.92	Q14BZ3	Lxn	Latexin	3	0.010286	39.338	0	8398200	8042800	11635000	0	12966000	0	0	0	2
IINTASIQSLICNNVK	1786.96	Q7TMV2	Ptgs2	Prostaglandin G/H synthase 2	2;3	1.99e-05	91.937	0	0	0	0	23781000	13011000	0	0	0	3
LIPYTSVGDFDWCAPPK	1964.93	Q6P5D8	Smchd1	Structural maintenance of chromosomes flexible hinge domain-containing protein 1	2	0.00034179	64.878	10369000	0	0	11181000	0	13016000	0	0	0	5
CVLMPMPSLGFNR	1520.73	Q8C407	Yipf4	Protein YIPF4	2	0.0023653	70.1	11008000	12917000	10891000	11062000	0	13022000	0	0	0	2
PALPFILR	925.575	A2AN08	Ubr4	E3 ubiquitin-protein ligase UBR4	2	0.0036229	102.98	0	0	0	16427000	0	13040000	0	0	0	10
FPTVPGAQDWDR	1387.65	Q3U7R1	Esyt1	Extended synaptotagmin-1	2	0.0031787	78.556	0	12403000	9678500	0	12219000	13046000	0	0	0	2
CESAPGCGVWQRPMIDNPNYK	2478.09	Q5SUC3	Canx	Calnexin	2;3	4.37e-14	118.46	0	0	14310000	0	0	13092000	0	0	0	5
IVSSASTDLQDYTYYFVPAPWLSVK	2849.42	P17426	Ap2a1	AP-2 complex subunit alpha-1	3	0.007148	17.716	10188000	0	11703000	0	10082000	13099000	0	0	0	5
ENEAVAPEFTNR	1375.64	Q9CQL5	Mrpl18	39S ribosomal protein L18, mitochondrial	2	6.93e-05	94.297	0	10833000	0	0	0	13114000	0	0	0	3
IPGGPQMIQLSLDGK	1552.83	P17563	Selenbp1;Selenbp2	Selenium-binding protein 1;Selenium-binding protein 2	2	2.61e-05	122.34	0	10896000	12873000	0	0	13145000	0	0	0	3
EVLEDPNMAGVPFLVLANK	2055.07	Q6P3A9	Arl11	ADP-ribosylation factor-like protein 11	2	6.6e-06	78.692	0	15014000	12017000	0	6277400	13150000	0	0	0	4
DRDDYVPYTGEK	1456.65	Q3TFA9	Tmod3	Tropomodulin-3	2	0.0025594	88.021	0	0	13659000	0	11319000	13153000	0	0	0	4
QMCICADFEK	1300.53	Q3UJQ3	Dars	Aspartate--tRNA ligase, cytoplasmic	2	0.030659	56.432	0	10646000	16980000	0	0	13170000	0	0	0	4
CLFQSPLFAK	1209.62	D3YUP1	Carm1	Histone-arginine methyltransferase CARM1	2	0.0052017	87.616	13411000	11460000	13281000	0	9143500	13185000	0	0	0	5
ILPLTGIPVLFLPGNAGSYK	2069.19	Q3UUQ7	Pgap1	GPI inositol-deacylase	2	2.14e-05	76.073	11919000	10778000	17417000	8151400	8148400	13189000	0	0	0	8
FELACLANLCPETAEESK	2080.94	Q9D7M8	Polr2d	DNA-directed RNA polymerase II subunit RPB4	2	9.27e-07	92.925	14344000	10649000	0	13224000	0	13206000	0	0	0	6
ETSATTLSPGAGNR	1360.66	Q99LS5	Tex264		2	0.01568	48.741	0	0	13104000	0	0	13218000	0	0	0	3
AISSPSGLAYPDDVLDYGLKPCNPLASLSGEPPGR	3612.78	B5B2P6	Nfatc2	Nuclear factor of activated T-cells, cytoplasmic 2	3	0.044192	19.375	9034500	0	0	0	0	13291000	0	0	0	4
YYAFPQMITPLVTK	1670.87	O35969	Gamt	Guanidinoacetate N-methyltransferase	2	0.014423	62.466	0	17430000	13472000	10723000	0	13306000	0	0	0	3
CLELFTELAEDKENYK	2000.94	Q80Y52	Hsp90aa1	Heat shock protein HSP 90-alpha	2	0.00030344	88.441	0	0	0	0	0	13307000	0	0	0	2
FPCLEEK	921.427	Q8K224	Nat10	N-acetyltransferase 10	2	0.02575	77.741	14784000	14818000	0	0	0	13325000	0	0	0	6
LWDHATMTEVK	1329.64	B2RUC7	Strap	Serine-threonine kinase receptor-associated protein	2	0.00032113	80.787	13033000	0	16901000	0	0	13332000	0	0	0	7
LLGNTFVALSDLR	1417.79	Q3UF95	Bag6	Large proline-rich protein BAG6	2	6.66e-05	94.297	8210400	8394700	0	0	9209600	13339000	0	0	0	4
VNNVFDHFSDCDFLAALYNPFGK	2689.23	D3YWJ5	Tnfaip8	Tumor necrosis factor alpha-induced protein 8	3	0.025646	27.081	0	0	12550000	0	0	13390000	0	0	0	3
LWMSLGDSWVK	1320.65	Q3U2Z5	Eps8	Epidermal growth factor receptor kinase substrate 8	2	0.0035769	72.928	0	0	0	0	7064200	13441000	0	0	0	2
LFSVVSR	806.465	Q9WTR1	Trpv2	Transient receptor potential cation channel subfamily V member 2	2	0.022818	80.462	0	16663000	0	0	0	13486000	0	0	0	2
SLNQPTPPPMPILSQSEAK	2034.05	B1ARU4	Macf1	Microtubule-actin cross-linking factor 1	2	1.04e-06	89.013	7795500	0	11029000	13808000	4691600	13502000	0	0	0	5
LFACEVLYNIALMHAK	1891.97	O70145	Ncf2	Neutrophil cytosol factor 2	3	0.00099848	59.709	10603000	0	17391000	0	11879000	13514000	0	0	0	4
TAVLDFVDDYLK	1397.71	D3YY98	Stx18	Syntaxin-18	2	6.93e-05	94.297	0	0	16671000	0	0	13523000	0	0	0	2
SLPEYLENMVIK	1434.74	Q8R3N6	Thoc1	THO complex subunit 1	2	0.00046174	81.338	20108000	12422000	0	15490000	8922400	13525000	0	0	0	6
IHIDLPNEQAR	1304.68	Q14AQ1	Psmc6	26S protease regulatory subunit 10B	2	0.0022355	76.827	0	0	0	0	13810000	13542000	0	0	0	2
QPPGPVPPPSLPSER	1553.82	Q5F258	Git1	ARF GTPase-activating protein GIT1	2	0.03464	43.604	0	8565900	0	12805000	0	13554000	0	0	0	3
DIWQTVGSALWR	1430.73	Q6PDG0	Nup205		2	2.66e-07	132.91	10875000	10166000	17621000	18884000	10934000	13594000	0	0	0	8
LMTPTLSFLAR	1248.69	A2AJI1	Map7d1	MAP7 domain-containing protein 1	2	0.0019555	76.465	0	0	0	0	0	13595000	0	0	0	2
ETYNSLAAWLTDAR	1609.77	Q4V9W8	Rab4b	Ras-related protein Rab-4B	2	0.00083504	75.739	0	0	12133000	0	11370000	13630000	0	0	0	2
LNAVVNDFWAEISESVDK	2034.99	Q3TXS7	Psmd1	26S proteasome non-ATPase regulatory subunit 1	2	5.01e-08	107.14	19695000	14538000	0	0	17646000	13636000	0	0	0	4
DAMPSDANLNSINK	1488.69	B2RRX2	Ppp3ca	Serine/threonine-protein phosphatase;Serine/threonine-protein phosphatase 2B catalytic subunit alpha isoform	2	0.0025736	76.655	19230000	20553000	18249000	0	0	13738000	0	0	0	4
TVEPFASVIALPHLFSSEVNK	2284.21	Q99N96	Mrpl1	39S ribosomal protein L1, mitochondrial	3	0.0056556	28.454	0	0	14344000	0	0	13753000	0	0	0	5
GLPLFPLVK	982.622	F6RPJ9	Ide	Insulin-degrading enzyme	2	0.01574	66.682	12228000	9261700	9038500	14385000	21256000	13777000	0	0	0	10
FSPGAPSGPGPQPNQK	1564.76	Q8CD55	Zyx	Zyxin	2	0.00085623	73.666	15191000	12110000	14024000	0	0	13780000	0	0	0	4
CQIGSSMPSDPVQLQIHNDWLLLQASR	3092.52	P26151	Fcgr1	High affinity immunoglobulin gamma Fc receptor I	3	0.0018291	35.016	0	0	0	0	14079000	13782000	0	0	0	4
GFAFVQFK	942.496	Q8CGC6	Rbm28	RNA-binding protein 28	2	0.03275	62.714	0	0	13299000	0	0	13787000	0	0	0	4
CVFELPAENAKPHDVEINK	2209.08	Q3TA54	Vapb	Vesicle-associated membrane protein-associated protein B	4	0.010173	19.411	9039900	0	0	13336000	0	13803000	0	0	0	6
NLMEIVK	845.468	O54774	Ap3d1	AP-3 complex subunit delta-1	2	0.051517	62.717	0	0	13395000	0	0	13815000	0	0	0	2
APEVSQYIYQVYDSILK	2015.03	Q5SWR1	Ap2b1	AP complex subunit beta;AP-2 complex subunit beta	2;3	6.36e-09	117.93	34625000	0	11603000	0	15400000	13832000	0	0	0	5
IGGVQQDTILAEGLHFR	1852.98	Q3V235	Phb2	Prohibitin-2	2;3	4.27e-07	119.76	0	0	0	0	75142000	13833000	0	0	0	3
NPSWGNMILRPGSDSK	1757.85	Q9JM90	Stap1	Signal-transducing adaptor protein 1	3	0.042361	30.974	0	0	0	0	0	13863000	0	0	0	3
DDVASEVYR	1052.48	Q3V3K6	Pigs	GPI transamidase component PIG-S	2	0.0006561	121.62	0	11238000	0	0	0	13906000	0	0	0	2
LYESLLVGSLPDMNK	1677.86	Q9Z1E4	Gys1	Glycogen [starch] synthase, muscle	2	1.02e-06	111.63	9155400	13202000	11997000	15474000	0	13943000	0	0	0	2
LELEENQMK	1132.54	Q3UVI9	Abcf2	ATP-binding cassette sub-family F member 2	2	0.0021018	98.458	0	16239000	0	0	0	13959000	0	0	0	2
NINVLNADAQK	1198.63	Q4KMM5	Golm1	Golgi membrane protein 1	2	0.00088389	87.258	0	0	0	0	13534000	14021000	0	0	0	2
LFFPVIYDVK	1239.69	Q543X5	Cnot7	CCR4-NOT transcription complex subunit 7	2	0.0054154	76.064	13454000	8100900	13173000	0	14556000	14030000	0	0	0	7
KAPPDGWELIEPTLDELDQK	2293.15	E0CX20	Bud31	Protein BUD31 homolog	3	0.0041446	33.237	0	0	0	0	0	14039000	0	0	0	2
NQDEAPQSGMNGLPK	1584.72	Q99M08		Uncharacterized protein C4orf3 homolog	2	0.00074265	72.652	10385000	0	9256300	0	0	14043000	0	0	0	6
IWPYVYTLFSNK	1529.79	Q3U489	Ak4	Adenylate kinase 4, mitochondrial	2	0.00010954	83	0	10360000	19058000	0	0	14108000	0	0	0	7
NPQMGDPASLDQK	1399.64	A0A0A6YWT1	Fnbp1	Formin-binding protein 1	2	0.020999	47.844	0	0	0	0	0	14135000	0	0	0	2
NTFEVIPVTSSGSPVGDVPFIR	2317.2	Q3UH60	Dip2b	Disco-interacting protein 2 homolog B	2	1.21e-07	127.36	0	9962200	14146000	0	0	14158000	0	0	0	3
LVLTYVK	834.521	B9EKB8	Igf2r	Cation-independent mannose-6-phosphate receptor	2	0.071732	58.167	9281100	10243000	0	0	16401000	14172000	0	0	0	4
TVFGELPSGGGTVEK	1476.75	Q3TZ44	Galm	Aldose 1-epimerase	2	0.00052158	75.045	21302000	15062000	0	0	10201000	14224000	0	0	0	4
FPVFNMSYNPAENAVLLCTR	2342.12	Q8BTF0	Copa	Coatomer subunit alpha;Coatomer subunit alpha;Xenin;Proxenin	2;3	1.02e-21	149.3	31955000	0	15218000	0	15544000	14242000	0	0	0	7
DISTLNSGK	933.477	Q5RKP4	Rpn1	Dolichyl-diphosphooligosaccharide--protein glycosyltransferase subunit 1	2	0.0062867	79.713	0	16157000	24124000	0	15679000	14279000	0	0	0	4
PAVFIPVNR	1011.59	Q6NZL1	Dhx37		2	0.0019596	100.07	14461000	15681000	15342000	16578000	0	14304000	0	0	0	5
FLLEACK	879.452	D3Z7P3	Gls	Glutaminase kidney isoform, mitochondrial	2	0.033168	73.039	19896000	20338000	20333000	18388000	0	14436000	0	0	0	5
INAAVASPEAASNQPEAASTHPVTTSTPEDLEQPK	3557.71	A0A068EW80	Pml	Protein PML	3	0.068867	8.2664	0	0	0	0	0	14439000	0	0	0	6
DFGGAIQEYFK	1273.6	P97770	Thumpd3	THUMP domain-containing protein 3	2	0.00070946	89.886	18875000	14659000	0	0	0	14540000	0	0	0	3
MLETILR	874.495	Q8K0V4	Cnot3;mKIAA0691	CCR4-NOT transcription complex subunit 3	2	0.02965	75.269	0	0	15908000	17496000	0	14540000	0	0	0	3
WDLGLNK	844.444	Q9EPU0	Upf1	Regulator of nonsense transcripts 1	2	0.05695	61.494	12760000	15246000	0	0	0	14541000	0	0	0	3
AGTLIMALHDASDYLLESAK	2118.07	Q924Z4	Cers2	Ceramide synthase 2	3	0.00013127	60.602	0	0	10523000	8539400	0	14565000	0	0	0	4
DYSAPVNFISAGLK	1480.76	Q3UGE9	Tfip11	Tuftelin-interacting protein 11	2	0.00016024	88.441	11461000	0	0	0	0	14576000	0	0	0	4
SISDQYVESPTGR	1437.67	E9Q914	Smpd4	Sphingomyelin phosphodiesterase 4	2	0.0003295	85.958	0	0	15324000	0	0	14591000	0	0	0	6
NNQFNQDELALMEK	1692.78	D3YWJ5	Tnfaip8	Tumor necrosis factor alpha-induced protein 8	2	0.0063823	59.198	13839000	0	0	0	0	14641000	0	0	0	2
SGLEEKPESYDIPR	1618.78	Q8BJ03	Cox15	Cytochrome c oxidase assembly protein COX15 homolog	3	0.024798	34.954	0	0	0	0	10645000	14660000	0	0	0	4
IPTAGIYGASYVPFAAPATATIATLQK	2692.45	D3YXZ5	Rbm47	RNA-binding protein 47	3	0.0017431	35.621	0	20039000	0	0	0	14675000	0	0	0	2
VLASNPIMESIGNAK	1542.81	D3YZ62	Myo5a	Unconventional myosin-Va	2	8.83e-07	113.63	0	15966000	15981000	14546000	9171700	14702000	0	0	0	6
APQQQPPPQQPPPPQPPPQQPPPPPSYSPAR	3327.68	Q8VDM6	Hnrnpul1	Heterogeneous nuclear ribonucleoprotein U-like protein 1	3;4	0.060424	14.483	8385500	7832700	0	0	0	14720000	0	0	0	4
TTQIGCLLR	1060.57	Q6PEE6	Ap2a2	AP-2 complex subunit alpha-2	2	0.0061887	80.098	22614000	0	21576000	19222000	19689000	14770000	0	0	0	9
EPDQPPCCEEPTAMCQSPILHSSSSASSNIPSAK	3698.6	P15092	Ifi204	Interferon-activable protein 204	3	0.065974	9.2906	0	0	0	0	0	14776000	0	0	0	2
LLWIDTK	887.512	Q9Z2I0	Letm1	LETM1 and EF-hand domain-containing protein 1, mitochondrial	2	0.061859	60.39	0	0	0	0	18994000	14787000	0	0	0	2
QILMASGSTTFTK	1383.71	Q99PV0	Prpf8	Pre-mRNA-processing-splicing factor 8	2	0.013789	54.343	0	11146000	17136000	0	0	14798000	0	0	0	3
EFLGTAGFCR	1156.53	G4V4Z1	gag-pro-pol;gag-pol;mKIAA1466		2	0.0067462	72.23	0	0	0	18461000	0	14818000	0	0	0	2
AALLTQQADSPEDREPQQK	2124.04	B1ATP7	Elac2	Zinc phosphodiesterase ELAC protein 2	3	0.00015693	46.621	9293800	0	0	0	6379100	14851000	0	0	0	3
GETLGLIGFGR	1118.61	Q91YZ2	Ctbp2	C-terminal-binding protein 2	2	0.013082	66.621	7917100	0	7944400	9000800	8506400	14879000	0	0	0	4
DNSVSSFLDSTR	1326.61	A0A068EW80	Pml	Protein PML	2	0.00010076	93.258	0	0	0	0	13851000	14977000	0	0	0	2
ALYEQNQSDVNEAK	1607.74	Q8K1A2	Gins1	DNA replication complex GINS protein PSF1	2	1.37e-23	175.15	0	14203000	0	19266000	9827400	14994000	0	0	0	7
TLMQVLAFLSQDR	1520.8	D3Z0G0	Nif3l1	NIF3-like protein 1	2	0.00052303	79.82	14219000	13460000	11671000	0	0	14998000	0	0	0	6
SGYAIQADEEQLR	1478.7	Q8BTS4	Nup54	Nuclear pore complex protein Nup54	2	2.94e-05	100.88	0	0	18184000	0	13327000	15027000	0	0	0	2
LLLSTLTLLSK	1200.77	Q9JK38	Gnpnat1	Glucosamine 6-phosphate N-acetyltransferase	2	0.01511	70.1	13710000	11727000	14498000	0	0	15097000	0	0	0	6
TQLSAVLLR	999.608	Q922B3	Icam1	Intercellular adhesion molecule 1	2	0.047357	54.712	0	0	0	0	0	15117000	0	0	0	2
QVPALPGNPDHR	1299.67	P08101	Fcgr2;Fcgr2b	Low affinity immunoglobulin gamma Fc region receptor II	3	0.0087667	41.259	0	0	0	0	17754000	15117000	0	0	0	2
EMMLSIINSSITTK	1566.8	Q3U4U6	Cct3	T-complex protein 1 subunit gamma	2	0.0017467	89.189	0	15730000	19890000	0	0	15138000	0	0	0	2
LQAWMTR	904.459	Q3U1P2	Snx9	Sorting nexin;Sorting nexin-9	2	0.014572	98.418	0	12546000	0	19570000	0	15188000	0	0	0	3
MFVGQIPR	946.506	A3KGT2	Celf2	CUGBP Elav-like family member 2	2	0.023795	99.279	14901000	0	0	15026000	0	15192000	0	0	0	2
APEPPPQQVAQQQ	1416.7	Q5DTP7	Chd4	Chromodomain-helicase-DNA-binding protein 4	2	0.015142	53.124	11747000	0	0	0	9296700	15218000	0	0	0	3
MGTAVPRPPQDMGQLGVR	1908.97	Q3UJB0	Sf3b2		3	0.012151	42.913	0	0	0	17427000	0	15233000	0	0	0	2
IVGLSTALANAR	1184.69	E9PZJ8	Ascc3	Activating signal cointegrator 1 complex subunit 3	2	0.0054151	70.399	0	0	17667000	12228000	0	15256000	0	0	0	6
LFPYIQK	907.517	G3X9B1	Heatr1		2	0.063586	60.001	0	0	0	0	0	15264000	0	0	0	2
ACVSMLGVPVDPDTLHATLR	2151.08	Q4JG03	Huwe1	E3 ubiquitin-protein ligase HUWE1	3	0.019229	38.017	0	9272700	16111000	16853000	9727800	15270000	0	0	0	5
VVLQGSGEGTGLSALLPQPK	1950.08	Q05CA9	Prcc		2;3	0.00014563	62.89	7354300	6776700	9577100	6406200	5852300	15300000	0	0	0	12
TLLLCGYPNVGK	1333.71	Q99ME9	Gtpbp4	Nucleolar GTP-binding protein 1	2	0.00018036	90.629	20022000	20334000	23089000	14193000	0	15318000	0	0	0	7
EWTCPNLK	1046.49	Q6A0A9	FAM120A;Fam120c	Constitutive coactivator of PPAR-gamma-like protein 1	2	0.025938	67.344	9693500	0	13668000	15240000	0	15367000	0	0	0	5
DPVNGTWYIQSLCQSLR	2035.98	Q4FK85	Casp8	Caspase-8;Caspase-8 subunit p18;Caspase-8 subunit p10	2	3.9e-33	185.87	8824900	0	7632600	0	14159000	15400000	0	0	0	8
EFEDAFPADFIAEGIDQTR	2169.99	Q8BU30	Iars	Isoleucine--tRNA ligase, cytoplasmic	2	2.04e-06	83.204	17372000	0	0	0	0	15423000	0	0	0	2
LLPAITILGCR	1225.72	Q3UNC0	Gmppa	Mannose-1-phosphate guanyltransferase alpha	2	0.0058112	66.435	0	8704000	0	0	0	15459000	0	0	0	3
PLVIIAEDVDGEALSTLVLNR	2236.23	P63038	Hspd1	60 kDa heat shock protein, mitochondrial	3	0.050438	22.01	0	0	0	0	0	15494000	0	0	0	2
TTPQTLSNLCLK	1374.72	Q8CJG0	Ago2	Protein argonaute-2	2	6.89e-05	94.309	0	15320000	15446000	0	0	15494000	0	0	0	5
LLPCPPLDFFRPCR	1786.9	Q8R5K4	Nol6	Nucleolar protein 6	3	0.032808	38.799	0	0	0	0	0	15499000	0	0	0	2
LFSAYGPLSELHYPIDSLTK	2250.16	Q8R3C6	Rbm19	Probable RNA-binding protein 19	3	0.00013251	60.564	14710000	0	13336000	9402600	0	15555000	0	0	0	12
LQQYYLFIPSK	1398.75	Q4VBG1	Ddx47	Probable ATP-dependent RNA helicase DDX47	2	3.93e-07	107.79	0	0	0	0	0	15564000	0	0	0	3
QTDVLQQLSIQMANAK	1786.92	Q9JHU4	Dync1h1	Cytoplasmic dynein 1 heavy chain 1	2;3	7.05e-38	194.96	12340000	20089000	15658000	13350000	11467000	15590000	0	0	0	6
GFDQDMANK	1024.43	Q9JMH6	Txnrd1	Thioredoxin reductase 1, cytoplasmic	2	0.0059111	81.191	12247000	0	15289000	13073000	0	15607000	0	0	0	6
AMAVLEPLQVVITNFPAPK	2037.13	Q8BU21	Qars		2	4.06e-06	100.19	0	0	0	0	9055000	15638000	0	0	0	2
VNVAGLVLAGSADFK	1459.8	Q3TL10	Etf1	Eukaryotic peptide chain release factor subunit 1	2;3	0.00020495	68.676	34945000	0	20374000	0	9919300	15642000	0	0	0	11
MFVDLNPDSDK	1279.58	Q3UHH5	Gnaq;Gna11	Guanine nucleotide-binding protein G(q) subunit alpha;Guanine nucleotide-binding protein subunit alpha-11	2	0.013082	60.518	20401000	15479000	20334000	16868000	0	15674000	0	0	0	5
ALLLSTYIK	1020.62	P17426	Ap2a2;Ap2a1	AP-2 complex subunit alpha-2;AP-2 complex subunit alpha-1	2	0.039543	57.047	13661000	0	13276000	0	0	15720000	0	0	0	3
ASLQSGSRPGQEGEGGLK	1756.87	Q8R409	Hexim1	Protein HEXIM1	3	0.013408	28.472	0	14375000	21584000	18511000	15431000	15749000	0	0	0	7
NQISPFISQMCNMLGLGDMNADQLASK	2982.37	O54984	Asna1	ATPase Asna1	2;3	1.34e-16	69.47	0	0	16999000	22648000	0	15813000	0	0	0	4
PVSAIKPTAAPPLAEAGAAK	1859.05	Q9D2G2	Dlst	Dihydrolipoyllysine-residue succinyltransferase component of 2-oxoglutarate dehydrogenase complex, mitochondrial	3	0.00061751	45.369	11824000	7892900	12934000	7958700	12122000	15814000	0	0	0	6
VADPDHDHTGFLTEYVATR	2143	Q3UF82	Mapk1;Erk2	Mitogen-activated protein kinase;Mitogen-activated protein kinase 1	3	6.38e-06	77.39	0	0	0	0	8977600	15868000	0	0	0	6
TPQPEEGATYEGIQK	1646.78	Q8K009	Aldh1l2	Mitochondrial 10-formyltetrahydrofolate dehydrogenase	2	9.91e-06	105.25	22783000	19026000	0	0	0	15873000	0	0	0	4
DNLFEIITTSR	1307.67	F8WIK5	Plekha2	Pleckstrin homology domain-containing family A member 2	2	0.0012482	81.771	0	0	0	0	0	15882000	0	0	0	7
LTGGSNWQPK	1086.55	Q3TD51	Picalm	Phosphatidylinositol-binding clathrin assembly protein	2	0.0037295	78.149	0	0	0	0	14141000	15913000	0	0	0	2
VVEQGMFVK	1035.54	Q8R5H1	Usp15	Ubiquitin carboxyl-terminal hydrolase 15	2	0.008954	75.109	0	0	0	0	0	15924000	0	0	0	2
QFLPVAFPVGNAFSYYQSNR	2304.13	Q9EPE9	Atp13a1;mKIAA1825	Manganese-transporting ATPase 13A1	2;3	0.00037029	55.213	10086000	8829500	0	14014000	0	15935000	0	0	0	5
PFFGYNFGR	1103.52	Q8BH04	Pck2	Phosphoenolpyruvate carboxykinase [GTP], mitochondrial	2	0.014444	68.422	16759000	15489000	0	0	0	16020000	0	0	0	3
STELDSNWSWLQLR	1733.84	Q99K28	Arfgap2	ADP-ribosylation factor GTPase-activating protein 2	2	2.23e-08	147.37	20812000	0	19148000	0	13688000	16028000	0	0	0	5
DVEREDIEFICK	1551.72	Q564F4	Cct4	T-complex protein 1 subunit delta	2;3	0.0021667	81.865	20482000	16777000	20581000	26486000	0	16031000	0	0	0	8
VEGDIWALQK	1157.61	Q8BTB8	Mrpl49	39S ribosomal protein L49, mitochondrial	2	0.0023661	85.161	0	0	20145000	0	0	16034000	0	0	0	2
SPSAQLMEQVAQLK	1528.79	Q3TB96	Dctn1	Dynactin subunit 1	2	0.00016818	88.021	0	0	0	18437000	10406000	16046000	0	0	0	2
WNSVPPASAGK	1112.56	Q80WJ7	Mtdh	Protein LYRIC	2	0.0050573	68.626	0	15405000	0	17585000	0	16114000	0	0	0	5
DAAQSSPAFGDR	1220.54	Q9DD05	Alad	Delta-aminolevulinic acid dehydratase	2	0.00043379	82.261	14330000	0	0	14025000	11986000	16130000	0	0	0	4
YLLLNPK	859.517	Q3TH57	Tcerg1	Transcription elongation regulator 1	2	0.041526	67.741	21652000	21455000	22486000	20930000	13973000	16132000	0	0	0	7
FQQQILAQQK	1230.67	B2RY27	Taok3	Serine/threonine-protein kinase TAO3	2	0.0019221	88.358	14086000	17357000	0	0	0	16141000	0	0	0	4
FYFLEAYNSK	1280.61	P13864	Dnmt1	DNA (cytosine-5)-methyltransferase 1;DNA (cytosine-5)-methyltransferase	2	0.00089036	97.431	0	16233000	0	0	0	16263000	0	0	0	4
TLGVLYWK	978.554	Q99JT9	Adi1	1,2-dihydroxy-3-keto-5-methylthiopentene dioxygenase	2	0.022188	70.912	0	22144000	0	17279000	13686000	16303000	0	0	0	4
WDAWNALGSLPK	1356.68	E9Q7A8	Eci2	Enoyl-CoA delta isomerase 2, mitochondrial	2	0.0038618	65.5	0	0	11062000	0	12112000	16328000	0	0	0	4
DLAYCMSQLPLTER	1695.8	Q8K2Z4	Ncapd2	Condensin complex subunit 1	2	2.44e-11	142.08	0	14359000	0	22584000	0	16357000	0	0	0	3
TQQPTECFLTQTK	1580.75	Q9CZT6	Cmss1	Protein CMSS1	2	0.00029907	86.923	23213000	0	18237000	18300000	0	16366000	0	0	0	5
AAESSVAPSREELLGTK	1743.9	Q8BJZ4	Mrps35	28S ribosomal protein S35, mitochondrial	3	0.0015673	57.288	0	0	0	0	0	16400000	0	0	0	2
IDQLQEELLHTQLK	1706.92	Q80TX7	mKIAA0567;Opa1	Dynamin-like 120 kDa protein, mitochondrial;Dynamin-like 120 kDa protein, form S1	3	0.069296	26.148	0	0	0	0	0	16423000	0	0	0	2
PCPFWNDINQCGR	1662.7	Q4FK57	Ero1l	ERO1-like protein alpha	2	0.00038588	84.17	0	9421400	0	0	0	16431000	0	0	0	3
DFIYAVR	882.46	Q3TKC5	Ppat	Amidophosphoribosyltransferase	2	0.041526	67.741	0	0	17382000	0	0	16447000	0	0	0	2
KPEVSGSDILDNNGTYGK	1892.91	Q53YN4	Prkcd	Protein kinase C delta type;Protein kinase C delta type;Protein kinase C delta type regulatory subunit;Protein kinase C delta type catalytic subunit;Protein kinase C	3	8.15e-07	66.893	0	0	0	0	13718000	16481000	0	0	0	2
[truncated: 18,911 more rows]

## Sheet: Table S2
Table S2: Proteins that identified in biological replicates are listed with their corresponding intensities .
Protein IDs	Majority protein IDs	Protein names	Gene names	LFQ intensity CA_1_A	LFQ intensity CA_2_A	LFQ intensity CA_3_A	LFQ intensity c-di-GMP_1_A	LFQ intensity c-di-GMP_2_A	LFQ intensity c-di-GMP_3_A	LFQ intensity cGAMP_1_A	LFQ intensity cGAMP_2_A	LFQ intensity cGAMP_3_A
Q3UCL2;Q3U7K7;Q921V6;Q62191	Q3UCL2;Q3U7K7;Q921V6;Q62191	E3 ubiquitin-protein ligase TRIM21	Trim21	0	0	0	0	0	0	0	6434300	14612000
Q1MX43;Q1MX42;Q1MX41;Q1MX40	Q1MX43;Q1MX42;Q1MX41;Q1MX40	Protein kinase C	Prkcd	0	0	0	0	0	0	0	9648500	11327000
Q3UHZ7;Q3TAD4;Q91YN5	Q3UHZ7;Q3TAD4;Q91YN5	UDP-N-acetylhexosamine pyrophosphorylase;UDP-N-acetylgalactosamine pyrophosphorylase;UDP-N-acetylglucosamine pyrophosphorylase	Uap1	0	0	0	0	0	0	0	11141000	11078000
D6RDS1;Q3UQQ2;Q3T9P8;F6RND1;Z4YJR1;Q3U3R4	D6RDS1;Q3UQQ2;Q3T9P8;F6RND1;Z4YJR1;Q3U3R4	Lipase maturation factor;Lipase maturation factor 1	Lmf1	0	0	0	0	0	0	0	13257000	17797000
Q8C6Y2;B9EIV8;Q9WVL3	Q8C6Y2;B9EIV8;Q9WVL3	Solute carrier family 12 member 7	Slc12a7	0	0	0	0	0	0	0	13919000	15818000
F7CWA0;Q9D3W4	F7CWA0;Q9D3W4	GPN-loop GTPase 3	Gpn3	0	0	0	0	0	0	0	13946000	12562000
A1L333;Q9CSD9;S4R1E3;B1ARB8;Q921Y3	A1L333		Ddx5	0	0	0	0	0	0	0	14149000	21468000
Q99JH1	Q99JH1	Ribonuclease P protein subunit p25-like protein	Rpp25l	0	0	0	0	0	0	0	14543000	13417000
Q69ZE0;Q8BX12;Q91W39;B7ZC23;B7ZC24	Q69ZE0;Q8BX12;Q91W39;B7ZC23;B7ZC24	Nuclear receptor coactivator 5	Ncoa5	0	0	0	0	0	0	0	15476000	18240000
Q3TAJ6;Q80U29;P58854;Q3TN67	Q3TAJ6;Q80U29;P58854;Q3TN67	Gamma-tubulin complex component 3	Tubgcp3;mKIAA0357	0	0	0	0	0	0	0	16166000	13090000
Q8C6F3;G5E897	Q8C6F3;G5E897		Kdelc2	0	0	0	0	0	0	0	28293000	26978000
Q69ZA6;Q14AX3;Q8C2V2	Q69ZA6		Kctd12	0	0	0	0	0	0	0	34072000	21760000
Q3THJ3	Q3THJ3	Probable RNA-binding protein EIF1AD	Eif1ad	0	0	0	0	0	0	0	36110000	42122000
Q4FZE5	Q4FZE5		Eef1a1	0	0	0	0	0	0	0	56323000	98148000
Z4YLD0;Q8VDP2	Z4YLD0;Q8VDP2	UPF0428 protein CXorf56 homolog	C330007P06Rik	0	0	0	0	0	0	6173700	8552600	0
I3QI48;Q504P2	I3QI48;Q504P2	C-type lectin domain family 12 member A	Clec12a	0	0	0	0	0	0	7309400	8580400	9749300
Q9R1Q6	Q9R1Q6	Transmembrane protein 176B	Tmem176b	0	0	0	0	0	0	9079600	0	14555000
Q3TXI7;Q3UJU3;I3RSH5;Q9DBH0	Q3TXI7;Q3UJU3;I3RSH5;Q9DBH0	E3 ubiquitin-protein ligase;NEDD4-like E3 ubiquitin-protein ligase WWP2	Wwp2	0	0	0	0	0	0	10096000	0	12076000
E9PVP1;Q3UN98;Q4VC42	E9PVP1;Q3UN98;Q4VC42		Aim1	0	0	0	0	0	0	10547000	9299200	11430000
F8VQG4;Q9XRZ3;Q31129;Q7YP94;Q0WXH3;Q31166;Q8MHM0;Q31093	F8VQG4;Q9XRZ3;Q31129;Q7YP94;Q0WXH3;Q31166;Q8MHM0;Q31093		H2-T24;M3a;H2-M3;MHC class I H-2M3	0	0	0	0	0	0	13082000	10971000	0
Q3UY32;Q9Z266	Q3UY32;Q9Z266	SNARE-associated protein Snapin	Snapin	0	0	0	0	0	0	16599000	0	14835000
Q8VDU3	Q8VDU3		Apol9a	0	0	0	0	0	0	32055000	21788000	28796000
Q3UDK1	Q3UDK1	TRAF-type zinc finger domain-containing protein 1	Trafd1	0	0	0	0	0	0	33930000	29140000	43323000
Z4YN17;Q5NBU8;F6ZMN8	Z4YN17;Q5NBU8;F6ZMN8	XIAP-associated factor 1	Xaf1	0	0	0	0	0	0	36712000	0	49007000
Q8VI11;Q8VHH6;Q0VBK4;Q8R4G9	Q8VI11;Q8VHH6;Q0VBK4;Q8R4G9	Neuronal acetylcholine receptor subunit alpha-3	Chrna3	0	0	0	0	0	0	321360000	277780000	0
Q8VC88	Q8VC88	Grancalcin	Gca	6898400	0	0	0	0	0	5293700	5505600	6341100
Q3U319	Q3U319	E3 ubiquitin-protein ligase BRE1B	Rnf40	11510000	0	0	0	0	0	11116000	0	12518000
Q52L66;Q91W67	Q52L66;Q91W67	Ubiquitin-like protein 7	Ubl7	12139000	0	0	0	0	0	13634000	0	12324000
A2AUR3;Q60866;A2AUR5	A2AUR3;Q60866;A2AUR5	Phosphotriesterase-related protein	Pter	29745000	0	0	0	0	0	0	24110000	0
Q91XT6	Q91XT6	Tandem C2 domains nuclear protein	Tc2n	70539000	0	0	0	0	0	0	110740000	140270000
Q80UK0	Q80UK0	SEC14 domain and spectrin repeat-containing protein 1	Sestd1	3497200	0	3296600	0	0	0	0	3922000	0
Q8K4Q7	Q8K4Q7	Ceramide kinase	Cerk	3183800	0	3895900	0	0	0	0	0	0
Q7TSV4	Q7TSV4	Phosphoglucomutase-2	Pgm2	0	0	4193200	0	0	0	0	4864300	4912000
A2RT28;Q499X9	A2RT28;Q499X9	Methionine--tRNA ligase, mitochondrial	Mars2	0	0	6829600	0	0	0	4225700	0	0
Q9CY94	Q9CY94	DNA replication complex GINS protein PSF3	Gins3	9191600	0	7442300	0	0	0	0	7431100	12099000
Q3UVL4	Q3UVL4	Vacuolar protein sorting-associated protein 51 homolog	Vps51	8380300	0	7754200	0	0	0	8129500	0	0
E9Q1P8	E9Q1P8	Interferon regulatory factor 2-binding protein 2	Irf2bp2	6192800	0	8309700	0	0	0	0	5499600	5975800
G3X8Q0;O89090;E9Q0S7;A2TH11;E9Q2V3;E9Q113	G3X8Q0;O89090;E9Q0S7;A2TH11;E9Q2V3;E9Q113	Transcription factor Sp1	Sp1	0	0	8657800	0	0	0	8061400	8558400	9598300
E9PWY2;Q7TPY0;G3X8R4;E9QKD9;Q9DBA9	E9PWY2;Q7TPY0;G3X8R4;E9QKD9;Q9DBA9	General transcription factor IIH subunit 1	Gtf2h1	0	0	8946700	0	0	0	0	6683900	0
Q3UDK0;Q3U2A3;Q3TPN9;E9Q605;Q8CBT3;Q3U2E5;E9QNL4;Q60680	Q3UDK0;Q3U2A3;Q3TPN9;E9Q605;Q8CBT3;Q3U2E5;E9QNL4;Q60680	Inhibitor of nuclear factor kappa-B kinase subunit alpha	Chuk	0	0	9344900	0	0	0	0	7251200	0
Q6P9Q2;P70700;A2AP84	Q6P9Q2;P70700;A2AP84	DNA-directed RNA polymerase;DNA-directed RNA polymerase I subunit RPA2	Polr1b	0	0	9917500	0	0	0	9023100	0	0
Q3TF81;O88796;Q8K238;Q6P6M0	Q3TF81;O88796;Q8K238;Q6P6M0	Ribonuclease P protein subunit p30	Rpp30	0	0	10801000	0	0	0	14020000	0	0
Q8VC93;Q8C460	Q8VC93;Q8C460	ERI1 exoribonuclease 3	Eri3	9160700	0	11796000	0	0	0	0	0	0
Q3TLZ6;Q8BW84;Q99JT1	Q3TLZ6;Q8BW84;Q99JT1	Glutamyl-tRNA(Gln) amidotransferase subunit B, mitochondrial	Gatb	0	0	14485000	0	0	0	0	11527000	0
Q7TSI1	Q7TSI1	Pleckstrin homology domain-containing family M member 1	Plekhm1	15708000	0	15276000	0	0	0	0	18222000	0
A2A485;Q3UH28;Q3V1I9;Q3U1M7;A2A483;E9Q8D1;A2A482;A2A484;Q8CHB3;Q80Y82;Q80XT8;A2A481;A2A480;Q6P4S7;Q3V437	A2A485;Q3UH28;Q3V1I9;Q3U1M7;A2A483;E9Q8D1;A2A482;A2A484;Q8CHB3;Q80Y82;Q80XT8		Zmynd8	10319000	0	15976000	0	0	0	0	0	0
Q8BK02;Q8VE96	Q8BK02;Q8VE96	Solute carrier family 35 member F6	Slc35f6	0	0	18276000	0	0	0	0	0	21496000
V9GX26;K3W4S6;Q9R062	V9GX26;K3W4S6;Q9R062	Glycogenin-1	Gyg;Gyg1	24896000	0	19934000	0	0	0	0	0	0
P47857;Q99K08;Q1LZL7	P47857;Q99K08;Q1LZL7	ATP-dependent 6-phosphofructokinase, muscle type;ATP-dependent 6-phosphofructokinase	Pfkm	20584000	0	20113000	0	0	0	0	0	0
Q6ZWZ2	Q6ZWZ2	Ubiquitin-conjugating enzyme E2 R2	Ube2r2	0	0	20560000	0	0	0	0	0	20318000
Q4U214;Q60998;E9PVJ6;Q80W11;Q68FL5;Q6P4T4;Q9JLU0;E9Q4I1;Q9ERM5;E9Q612;Q4U213	Q4U214;Q60998;E9PVJ6;Q80W11;Q68FL5;Q6P4T4;Q9JLU0;E9Q4I1;Q9ERM5;E9Q612;Q4U213	Protein-tyrosine-phosphatase;Receptor-type tyrosine-protein phosphatase O	Ptpro;PTPphi	0	0	24016000	0	0	0	16386000	17596000	0
B2RXQ8;Q8BFQ4	B2RXQ8;Q8BFQ4	WD repeat-containing protein 82	Wdr82	25426000	0	30570000	0	0	0	26963000	17315000	31166000
A0A0A6YXB5;E9Q159;Q99PJ1	A0A0A6YXB5;E9Q159;Q99PJ1	Protocadherin-15	Pcdh15	0	0	39688000	0	0	0	43102000	0	93066000
Q3TAH3;Q9CPP0	Q3TAH3;Q9CPP0	Nucleoplasmin-3	Npm3	55234000	0	58710000	0	0	0	0	0	0
G3UXB4;Q3U308;D3Z2M0	G3UXB4;Q3U308	Cytoplasmic tRNA 2-thiolation protein 2	Ctu2	69737000	0	100220000	0	0	0	0	0	0
A0JNZ1;Q8BTI9;Q9CTK7;Q3TNJ8	A0JNZ1;Q8BTI9;Q9CTK7;Q3TNJ8	Phosphatidylinositol 4,5-bisphosphate 3-kinase catalytic subunit beta isoform	Pik3cb	5231700	4376400	0	0	0	0	4707500	6643500	5668800
D3Z3D2;Q9CQ49	D3Z3D2;Q9CQ49	Nuclear cap-binding protein subunit 2	Ncbp2	0	4558000	6169900	0	0	0	3993300	0	3396400
Q8BGX2	Q8BGX2	Uncharacterized protein C19orf52 homolog		5688200	4854100	0	0	0	0	0	0	0
E9Q467;B7ZWC5;Q3TZN9;E9Q236;B9EKC2	E9Q467;B7ZWC5;Q3TZN9;E9Q236;B9EKC2		Abcc4	5345000	4945400	0	0	0	0	0	0	0
O55091	O55091	Protein IMPACT	Impact	4064700	5104500	0	0	0	0	0	5296300	6320900
Q0P6I6;Q9D8L5	Q0P6I6;Q9D8L5	Coiled-coil domain-containing protein 91	Ccdc91	5089700	5358200	0	0	0	0	0	0	0
Q8BGD8	Q8BGD8	Cytochrome c oxidase assembly factor 6 homolog	Coa6	0	5602100	6111500	0	0	0	0	5533100	7539200
Q6P1B8;B8JJC1;Q8BJ37	Q6P1B8;B8JJC1;Q8BJ37	Tyrosyl-DNA phosphodiesterase 1	Tdp1	0	6008600	4303300	0	0	0	0	0	0
Q3UAR8;Q3V0N3;Q8JZZ6	Q3UAR8;Q3V0N3;Q8JZZ6	AMMECR1-like protein	Ammecr1l	8405200	6052300	0	0	0	0	0	0	0
Q548B0;Q9CYF5	Q548B0;Q9CYF5	Williams-Beuren syndrome chromosomal region 16 protein homolog	Wbscr16	0	6449100	6071100	0	0	0	0	0	0
F6VZ99;Q9D720	F6VZ99;Q9D720	Non-structural maintenance of chromosomes element 1 homolog	Nsmce1	0	6602400	7528100	0	0	0	0	9267100	6374500
D3YVC8;F6UDW0;F6WLR1;B7ZMQ0;Q14AI6	D3YVC8;F6UDW0;F6WLR1;B7ZMQ0;Q14AI6	RNA pseudouridylate synthase domain-containing protein 3	Rpusd3	6664000	6880900	0	0	0	0	0	0	0
Q91W86;Q8C027;Q8BYQ1	Q91W86;Q8C027	Vacuolar protein sorting-associated protein 11 homolog	Vps11	151530000	7207000	16654000	0	0	0	11986000	14617000	10620000
Q6RSD4;Q3U1X9;Q3U1P1;Q3UU15;P51829	Q6RSD4;Q3U1X9;Q3U1P1;Q3UU15;P51829	Adenylate cyclase type 7	Adcy7	5385000	7561100	0	0	0	0	0	0	0
Q8R3F5	Q8R3F5	Malonyl-CoA-acyl carrier protein transacylase, mitochondrial	Mcat	0	7658200	5665200	0	0	0	0	0	0
Q6ZQF0;A0A087WPG9	Q6ZQF0	DNA topoisomerase 2-binding protein 1	Topbp1	0	7764200	0	0	0	0	0	6939200	0
Q8JZL3	Q8JZL3	Thiamine-triphosphatase	Thtpa	7344400	7786000	0	0	0	0	0	0	0
Q8CCM0;E9Q1V9;E9Q1T1;Q6PHZ2;Q8C8X9;E9PXV3;E9Q1W0;F6ZIE1;E9QAJ4;D6RDQ8	Q8CCM0;E9Q1V9;E9Q1T1;Q6PHZ2;Q8C8X9;E9PXV3;E9Q1W0	Calcium/calmodulin-dependent protein kinase type II subunit delta	Camk2d	0	8070000	0	0	0	0	0	0	5973700
F6SMY7;E9PUJ6;Q7TPH6;F7CZG3;F6T4V9	F6SMY7;E9PUJ6;Q7TPH6	E3 ubiquitin-protein ligase MYCBP2	Mycbp2	0	8302000	0	0	0	0	0	4008600	0
Q7TND5	Q7TND5	Ribosome production factor 1	Rpf1	0	8752700	9028400	0	0	0	5938000	0	0
Q9JMF7	Q9JMF7	Dolichyldiphosphatase 1	Dolpp1	8422500	8773000	0	0	0	0	0	7827100	14892000
Q3UHZ3;J3QNW0;Q3UWN4	Q3UHZ3;J3QNW0	DNA (cytosine-5)-methyltransferase	Dnmt1	0	9211900	0	0	0	0	0	13547000	0
Q8BP17;Q543Q4;P35276;Q3TU26;Q542T7;P62823	Q8BP17;Q543Q4;P35276	Ras-related protein Rab-3D	Rab3d	10556000	9218800	7442200	0	0	0	7830800	0	0
Q3U186;A2AT41	Q3U186;A2AT41	Probable arginine--tRNA ligase, mitochondrial	Rars2	14180000	9511700	13627000	0	0	0	0	0	0
E9QAS9;Q547R0;E9QAT0;D3Z6U8;E9QNF5;Q6AXB7;E9QAS8;P35922;Q8BPK8;Q8BPN5;Q925S6	E9QAS9;Q547R0;E9QAT0;D3Z6U8;E9QNF5;Q6AXB7;E9QAS8;P35922;Q8BPK8;Q8BPN5	Fragile X mental retardation protein 1 homolog	Fmr1	14815000	10122000	0	0	0	0	0	0	15465000
Q9CQ02	Q9CQ02	COMM domain-containing protein 4	Commd4	10869000	10301000	11751000	0	0	0	0	10772000	11657000
J9UUF7;Q8VEA8	J9UUF7;Q8VEA8	Ras-related protein Rab-7b	5430435G22Rik;Rab7b	7907400	10530000	0	0	0	0	0	0	0
A2A7Y8;A8Y5E5;Q3UGM1;Q3TEX7;Q80U63	A2A7Y8;A8Y5E5;Q3UGM1;Q3TEX7;Q80U63	Mitofusin-2	Mfn2	9599500	10623000	15108000	0	0	0	0	0	0
Q149F1	Q149F1	RNA pseudouridylate synthase domain-containing protein 2	Rpusd2	8504400	10772000	0	0	0	0	0	8281600	0
Q7TPW6;Q9Z2Z6	Q7TPW6;Q9Z2Z6	Mitochondrial carnitine/acylcarnitine carrier protein	Slc25a20	0	11187000	0	0	0	0	0	34975000	0
Q7TQ95;A2ASL8	Q7TQ95;A2ASL8	Protein lunapark	Lnp	11265000	11544000	9978100	0	0	0	0	0	14345000
Q8BHL7	Q8BHL7	CDC42 small effector protein 1	Cdc42se1	18343000	12859000	0	0	0	0	0	20516000	25498000
Q8BN82	Q8BN82	Sialin	Slc17a5	9278000	13133000	9102600	0	0	0	0	0	0
A0A087WR05;G3X9W7;Q6NSS1;G3UWD2;Q3UM65	A0A087WR05;G3X9W7;Q6NSS1;G3UWD2;Q3UM65		Runx1	0	13868000	11273000	0	0	0	0	6831300	0
D6RCX5;D3Z0X8;D3YW54;Q9CWE0	D6RCX5;D3Z0X8;D3YW54;Q9CWE0	Mitochondrial fission regulator 1-like	Mtfr1l	0	17069000	14509000	0	0	0	0	0	0
Q8QZS3	Q8QZS3	Folliculin	Flcn	13635000	17185000	12417000	0	0	0	0	0	0
H9H9T1;Q3TGF2;H3BLM7	H9H9T1;Q3TGF2;H3BLM7	Protein FAM107B	Fam107b	0	17924000	16483000	0	0	0	0	0	0
B2RXR1;Q4QRL3	B2RXR1;Q4QRL3	Coiled-coil domain-containing protein 88B	Ccdc88b	0	19367000	18182000	0	0	0	0	0	15658000
V9GZG5;P15105;D3Z121;D3YVK1;V9GZP0	V9GZG5;P15105;D3Z121;D3YVK1;V9GZP0	Glutamine synthetase	Glul	22214000	19432000	0	0	0	0	0	0	0
Q3TSW9;P40630	Q3TSW9;P40630	Transcription factor A, mitochondrial	Tfam	0	20020000	18258000	0	0	0	0	0	0
Q99LG2;Q3U316;E9PV58;Q3U1S0	Q99LG2;Q3U316;E9PV58;Q3U1S0	Transportin-2	Tnpo2	0	20510000	0	0	0	0	0	0	29556000
Q9R0Y5;Z4YN97;A0A0A6YXW8	Q9R0Y5	Adenylate kinase isoenzyme 1	Ak1	0	20773000	15564000	0	0	0	0	0	0
B1AVZ0	B1AVZ0	Uracil phosphoribosyltransferase homolog	Uprt	0	21774000	14283000	0	0	0	0	19878000	0
Q9JM79;Q9DCS8;Q3U7H1;Q3TDT8;O09043	Q9JM79;Q9DCS8;Q3U7H1;Q3TDT8;O09043	Napsin-A	Napsa	23690000	21930000	19921000	0	0	0	0	0	6399000
A2AEW0;Q3U1L5;A2AEW1;Q64092;I6L9I6;Q32MU7;Q9WTW4	A2AEW0;Q3U1L5;A2AEW1;Q64092	Transcription factor E3	Tfe3	23015000	22240000	21011000	0	0	0	0	0	0
P62073	P62073	Mitochondrial import inner membrane translocase subunit Tim10	Timm10	0	23908000	0	0	0	0	0	18478000	18127000
Q8C1Y8	Q8C1Y8	Vacuolar fusion protein CCZ1 homolog	Ccz1	0	27875000	28508000	0	0	0	0	0	0
O35127	O35127	Protein C10	Grcc10	0	28858000	30017000	0	0	0	0	0	0
D3Z0K9;D3Z7W0;Q9D7P6	D3Z0K9;D3Z7W0;Q9D7P6	Iron-sulfur cluster assembly enzyme ISCU, mitochondrial	Iscu	30269000	28975000	35306000	0	0	0	0	28815000	0
Q543K2;Q9WU84	Q543K2;Q9WU84	Copper chaperone for superoxide dismutase	Ccs	0	29073000	32917000	0	0	0	0	0	30606000
Q9CQ10	Q9CQ10	Charged multivesicular body protein 3	Chmp3	0	33341000	29164000	0	0	0	26638000	33431000	27241000
Q3UZD4;Q3UFP6;P70445	Q3UZD4;Q3UFP6;P70445	Eukaryotic translation initiation factor 4E-binding protein 2	Eif4ebp2	41170000	38359000	34939000	0	0	0	0	0	0
Q3THL1;Q8BPI2;Q3U9H7;Q8C1Z9;F6V6T4;A2RS53;Q9R0Q3	Q3THL1;Q8BPI2;Q3U9H7;Q8C1Z9;F6V6T4;A2RS53;Q9R0Q3	Transmembrane emp24 domain-containing protein 2	Tmed2	0	42087000	0	0	0	0	0	0	44985000
D3Z512;Q3UM14;P56542;D3Z5U3	D3Z512;Q3UM14;P56542	Deoxyribonuclease-2-alpha	Dnase2a;Dnase2	46365000	43550000	42983000	0	0	0	0	0	0
D3YVZ9;Q059G7;P58059	D3YVZ9;Q059G7;P58059	28S ribosomal protein S21, mitochondrial	Mrps21	54794000	51334000	32037000	0	0	0	26096000	28225000	0
Q8VDP6;Q05BY1	Q8VDP6;Q05BY1	CDP-diacylglycerol--inositol 3-phosphatidyltransferase	Cdipt	50937000	56561000	54166000	0	0	0	0	56810000	50387000
F8VQJ3;Q3UNG0;P02468;Q6PHM1;Q3UFZ9;Q3TRH4;Q3URV4	F8VQJ3;Q3UNG0;P02468	Laminin subunit gamma-1	Lamc1	0	193190000	194050000	0	0	0	163380000	132150000	95982000
Q3UGY8	Q3UGY8	Brefeldin A-inhibited guanine nucleotide-exchange protein 3	Arfgef3	0	0	0	2344600	0	0	3350600	3645700	3079600
Q3TFK5	Q3TFK5	G patch domain-containing protein 4	Gpatch4	0	0	3926800	3379000	0	0	0	0	0
Q9D009	Q9D009	Putative lipoyltransferase 2, mitochondrial	Lipt2	6310100	6097100	5312700	3482100	0	0	0	0	0
Q8K0F1	Q8K0F1	TBC1 domain family member 23	Tbc1d23	0	0	0	4222800	0	0	0	5181000	5201700
V9GXD9;V9GX40;Q5SV85;Q3UQ32	V9GXD9;V9GX40;Q5SV85;Q3UQ32	Synergin gamma	Synrg	3491700	4406400	5032500	4659500	0	0	0	4986500	5401000
Q3UFM5	Q3UFM5	Nucleolar MIF4G domain-containing protein 1	Nom1	0	0	3923400	4736600	0	0	0	0	0
Q9DB28	Q9DB28	Ribonuclease P/MRP protein subunit POP5	Pop5	7059500	5563900	6536300	4754400	0	0	5772000	6317400	0
Q9CR59	Q9CR59	Growth arrest and DNA damage-inducible proteins-interacting protein 1	Gadd45gip1	0	0	5067400	4781400	0	0	0	0	4239000
Q91V83	Q91V83	TELO2-interacting protein 1 homolog	Tti1	3724900	5065300	0	5022200	0	0	3740700	0	0
Q8K114	Q8K114	Integrator complex subunit 9	Ints9	4778200	0	0	5153500	0	0	0	0	3591500
F6WK59;Q9CTC4;B7ZCT0;Q8CGT5;Q8BFU4;Q78NN4;B7ZCT1;Q9CX84	F6WK59;Q9CTC4;B7ZCT0;Q8CGT5;Q8BFU4;Q78NN4;B7ZCT1;Q9CX84	Regulator of G-protein signaling 19	Rgs19	7688400	0	6845700	5184600	0	0	0	0	0
G3UYZ1;Q8R366;A0A0A6YWK7	G3UYZ1;Q8R366	Immunoglobulin superfamily member 8	Igsf8	0	0	0	5516900	0	0	5298700	0	0
Q9D927	Q9D927		1810009N02Rik	7065500	5128600	0	5640000	0	0	0	0	0
Q9CR56	Q9CR56	NF-kappa-B inhibitor-interacting Ras-like protein 2	Nkiras2	5896900	0	8665200	5726400	0	0	0	0	6804300
Q8BY35	Q8BY35	FYVE, RhoGEF and PH domain-containing protein 2	Fgd2	0	0	6384000	5917300	0	0	0	5847200	8581800
Q9Z2B9	Q9Z2B9	Ribosomal protein S6 kinase alpha-4	Rps6ka4	5850000	6091700	0	5971800	0	0	5127900	0	0
B9EKJ3;Q80TL7	B9EKJ3;Q80TL7	Protein MON2 homolog	Mon2	7292800	6270800	5323600	5971900	0	0	0	0	0
Q8CE46	Q8CE46	Pseudouridylate synthase 7 homolog-like protein	Pus7l	3893300	5113400	0	6124100	0	0	0	0	0
A6PW47;Q99K74	A6PW47;Q99K74	Mediator of RNA polymerase II transcription subunit 24	Med24	5169600	6205900	0	6208400	0	0	4783800	7967200	0
C4IXU1;E9Q1A0;B7ZNY0;G3X9L9;B2RUJ9;Q80YT7;Q3UR03	C4IXU1;E9Q1A0;B7ZNY0;G3X9L9;B2RUJ9;Q80YT7;Q3UR03	Myomegalin	Pde4dip	0	0	6373200	6267500	0	0	0	7120700	0
Q6P1H6	Q6P1H6	Ankyrin repeat and LEM domain-containing protein 2	Ankle2	7493000	7332400	6997900	6306000	0	0	0	0	10029000
Q9D8Z1;Q3UMX8	Q9D8Z1	Activating signal cointegrator 1 complex subunit 1	Ascc1	0	0	0	6367100	0	0	8056300	0	9659000
Q91YP0	Q91YP0	L-2-hydroxyglutarate dehydrogenase, mitochondrial	L2hgdh	0	8011900	7454000	6408500	0	0	0	6861800	0
Q549P2;O70201	Q549P2;O70201	Baculoviral IAP repeat-containing protein 5	Birc5	0	0	6445600	6599500	0	0	0	0	5730500
Q8C545;B2RUP0;Q8C5L7	Q8C545;B2RUP0;Q8C5L7	RNA-binding protein 34	Rbm34	0	0	0	6758100	0	0	8449400	0	0
Q3UET8;E9QP84;G3UW74;Q6PGF3	Q3UET8;E9QP84;G3UW74;Q6PGF3	Mediator of RNA polymerase II transcription subunit 16	Med16	6864500	8110700	8350300	6791600	0	0	10965000	8794900	0
G5E8J8;F6ZBR8;O88286	G5E8J8;F6ZBR8;O88286	Protein Wiz	Wiz	0	4787300	0	7254700	0	0	0	0	0
Q3U1V6	Q3U1V6	Ubiquitin-conjugating enzyme E2 variant 3	Uevld	0	0	7780600	7427400	0	0	0	0	0
F8VQ95;Q6Y685;Q5DTJ3;Q3UL40;E9QL08;E9Q9Z4;E9Q8T1;Q9JJG0	F8VQ95;Q6Y685;Q5DTJ3;Q3UL40;E9QL08;E9Q9Z4;E9Q8T1;Q9JJG0	Transforming acidic coiled-coil-containing protein 1;Transforming acidic coiled-coil-containing protein 2	Tacc1;Tacc2	0	0	7507200	7459700	0	0	10483000	0	10046000
G3UY52	G3UY52		Usp9x	0	7089900	0	7693500	0	0	0	0	7239100
Q9JIH4;Q80TR0;Q8VHJ6;Q9WV30	Q9JIH4;Q80TR0;Q8VHJ6;Q9WV30	Nuclear factor of activated T-cells 5	Nfat5	0	7893600	0	7796500	0	0	0	0	0
C6KI94;Q32NY4	C6KI94;Q32NY4	Metal transporter CNNM3	Cnnm3	10096000	5916200	5563000	7878800	0	0	6915500	0	0
Q3TUC8;A2A4N9;Q3UQQ4;Q5DTN5;A2A4P0	Q3TUC8;A2A4N9;Q3UQQ4;Q5DTN5;A2A4P0	ATP-dependent RNA helicase DHX8	Dhx8	0	0	0	8095000	0	0	0	8373900	0
E9Q0Z7;E9Q265;Q8R0F3	E9Q0Z7;E9Q265;Q8R0F3	Sulfatase-modifying factor 1	Sumf1	0	6691600	6852100	8324800	0	0	5232100	0	0
B7ZWN1;Q80WE4	B7ZWN1;Q80WE4	Kinesin-like protein;Kinesin-like protein KIF20B	Kif20b	0	0	0	8353000	0	0	0	4689100	0
Q9QXE7	Q9QXE7	F-box-like/WD repeat-containing protein TBL1X	Tbl1x	7492000	8523100	0	8429100	0	0	9497100	0	0
Q9R061	Q9R061	Cytosolic Fe-S cluster assembly factor NUBP2	Nubp2	11421000	10163000	0	8714500	0	0	0	9997600	0
Q3UC73;P30412	Q3UC73;P30412	Peptidyl-prolyl cis-trans isomerase;Peptidyl-prolyl cis-trans isomerase C	Ppic	0	0	11108000	8847800	0	0	0	0	0
Q9DBQ6;Q3UME0;B5B2N5;B5B2N4;Q6P7T9;B5B2N7;B5B2N2;O88942	Q9DBQ6;Q3UME0;B5B2N5;B5B2N4;Q6P7T9;B5B2N7;B5B2N2;O88942	Nuclear factor of activated T-cells, cytoplasmic 1	Nfatc1	0	6015800	0	8859100	0	0	0	0	7095700
G3X934;Q3TWF6	G3X934;Q3TWF6	WD repeat-containing protein 70	Wdr70	7427400	7848000	5686900	8898100	0	0	0	0	9939900
Q8R034	Q8R034	Anaphase-promoting complex subunit 13	Anapc13	10331000	0	6736200	8918800	0	0	0	0	0
Q61213;P03975;Q3UGR7	Q61213;P03975	IgE-binding protein	gag;Iap	0	9678300	0	9194300	0	0	0	0	0
Q9D0D3	Q9D0D3	Poly(A) RNA polymerase, mitochondrial	Mtpap	8550700	8751900	7938900	9356800	0	0	0	0	0
Q9CR25;V9GX25	Q9CR25	Diphthamide biosynthesis protein 2	Dph2	7977000	7903500	5369900	9411500	0	0	0	0	0
Q923G2	Q923G2	DNA-directed RNA polymerases I, II, and III subunit RPABC3	Polr2h	13489000	25332000	0	9524700	0	0	0	0	12402000
B2RQS6;Q8VHK9;A0JLR3	B2RQS6;Q8VHK9;A0JLR3	ATP-dependent RNA helicase DHX36	Dhx36	46077000	0	9930300	9558000	0	0	0	14727000	19122000
A2A6P4	A2A6P4		Fam104a	7293200	0	8411500	9604200	0	0	0	10341000	0
Q6NZH9;Q2PHE9;Q69ZX7	Q6NZH9;Q2PHE9;Q69ZX7		Rasgrp3	10011000	9568300	8554500	9636200	0	0	0	0	9218000
D3YXG2;Q3U2G9;Q9D997;Q9QZ08	D3YXG2;Q3U2G9;Q9D997;Q9QZ08	N-acetyl-D-glucosamine kinase	Nagk	16625000	16545000	12656000	9663200	0	0	0	0	12828000
Q3TZQ3;Q544J7;Q3UCV9;Q3U6F0;Q3U0X4;Q3U075;Q3U068;P23611	Q3TZQ3;Q544J7;Q3UCV9;Q3U6F0;Q3U0X4;Q3U075;Q3U068;P23611	Interferon regulatory factor 8	Irf8	9936400	9928200	10467000	9791800	0	0	0	0	0
Q8K298;Q05CD5	Q8K298;Q05CD5	Actin-binding protein anillin	Anln	0	0	0	10126000	0	0	0	12788000	12921000
G3UYB1;G3UYC5;Q497T8;O35280	G3UYB1;G3UYC5;Q497T8;O35280	Serine/threonine-protein kinase Chk1	Chek1	0	7862100	0	10193000	0	0	0	0	10795000
I6L960;G3X9Y5;Q6A0C5;E9Q735	I6L960;G3X9Y5;Q6A0C5;E9Q735	Ubiquitin conjugation factor E4 A	Ube4a	0	0	13227000	10304000	0	0	0	0	0
P42232;Q6PHA0;Q9JIA0;B2C3G8;P42230;Q71UV3	P42232;Q6PHA0;Q9JIA0;B2C3G8;P42230	Signal transducer and activator of transcription 5B;Signal transducer and activator of transcription;Signal transducer and activator of transcription 5A	Stat5b;Stat5a	14831000	10072000	14893000	10344000	0	0	15341000	10144000	0
Q3TVP5	Q3TVP5	Inactive ubiquitin thioesterase FAM105A	Fam105a	14419000	0	13228000	10429000	0	0	0	10612000	0
Q9CZX7	Q9CZX7	Type 2 phosphatidylinositol 4,5-bisphosphate 4-phosphatase	Tmem55a	0	11545000	0	10448000	0	0	0	0	0
Q3U461;Q3TBT4;Q3U8Y2;Q3TR60;F8WGD2;Q9D684	Q3U461;Q3TBT4;Q3U8Y2;Q3TR60;F8WGD2;Q9D684	Ras and Rab interactor 2	Rin2	11084000	10162000	10246000	10634000	0	0	0	9157400	0
Q80T69	Q80T69	Round spermatid basic protein 1	Rsbn1	0	8252900	7823400	10795000	0	0	0	9997600	0
E9QN44;Q8CIM3;A0A087WR78	E9QN44;Q8CIM3	D-2-hydroxyglutarate dehydrogenase, mitochondrial	D2hgdh	16706000	15398000	13947000	10834000	0	0	0	0	0
Q5NC05	Q5NC05	Transcription termination factor 2	Ttf2	0	0	19532000	10883000	0	0	0	0	0
D3YX57;Q8K368;F7ALG5;F2Z414	D3YX57;Q8K368;F7ALG5	Fanconi anemia group I protein homolog	Fanci	0	0	10658000	10943000	0	0	0	8331600	0
Q9D7A8	Q9D7A8	Armadillo repeat-containing protein 1	Armc1	0	0	16863000	10998000	0	0	0	0	0
Q78HU3	Q78HU3	Multivesicular body subunit 12A	Mvb12a	0	0	0	11005000	0	0	0	17950000	0
A2API3;Q80V86	A2API3;Q80V86	Integrator complex subunit 8	Ints8	8303700	10493000	11291000	11089000	0	0	0	17545000	11998000
Q2TBE6	Q2TBE6	Phosphatidylinositol 4-kinase type 2-alpha	Pi4k2a	10412000	0	13303000	11261000	0	0	11334000	10592000	0
Q3UXF9;O70274	Q3UXF9;O70274	Protein tyrosine phosphatase type IVA 2	Ptp4a2	8158200	7875900	10894000	11275000	0	0	10001000	12144000	11864000
H3BKZ0;H3BJ52;G3X9Z0;Q8R060	H3BKZ0;H3BJ52;G3X9Z0;Q8R060	Protein zwilch homolog	Zwilch	5717000	0	7956900	11306000	0	0	0	0	0
Q3UGE1;Q8K2L8	Q3UGE1;Q8K2L8	Trafficking protein particle complex subunit 12	Trappc12	0	12842000	0	11362000	0	0	7448500	12194000	0
A1L0V7;Q4V9T7;Q3TDK9;Q99K95;Q3TEK4;A4QMY9	A1L0V7;Q4V9T7;Q3TDK9;Q99K95;Q3TEK4;A4QMY9	Protein RTF2 homolog	Rtfdc1	0	8464900	13307000	11424000	0	0	0	0	0
Q6ZQC2;Q3UZQ6;Q8R332	Q6ZQC2;Q3UZQ6;Q8R332	Nucleoporin p58/p45	Nupl1	10280000	9065800	11323000	11494000	0	0	7707400	11822000	0
E9PYH6;D3YUD4;D3YX07;D3YXL2;Q91Z33;Q80V59;Q80V17	E9PYH6;D3YUD4;D3YX07	Histone-lysine N-methyltransferase	Setd1a	8569300	10346000	10211000	11792000	0	0	9471100	0	0
B2KFW6;Q9QWH1	B2KFW6;Q9QWH1	Polyhomeotic-like protein 2	Phc2	10832000	11314000	0	11817000	0	0	11776000	11487000	10808000
E0CX59;E0CXK9;Q9CQ73;Q3TIY5	E0CX59;E0CXK9;Q9CQ73;Q3TIY5		Pkp2	0	10595000	9645300	12263000	0	0	0	0	0
Q9CQ28	Q9CQ28	Diphthine--ammonia ligase	Dph6	14541000	14555000	0	12446000	0	0	12658000	0	0
A0A087WRI8;G5E8E3;Q8R3Y5	A0A087WRI8;G5E8E3;Q8R3Y5	Uncharacterized protein C19orf47 homolog	2310022A10Rik	10269000	12026000	10600000	12717000	0	0	11814000	11258000	14712000
Q8C650	Q8C650	Septin-10	2018-09-10	8251000	0	0	12751000	0	0	12701000	0	0
Q80U95	Q80U95	Ubiquitin-protein ligase E3C	Ube3c	16319000	14414000	17613000	12910000	0	0	14842000	0	19003000
P48722;E0CY23;F6TFH3;Q3TTD4	P48722;E0CY23	Heat shock 70 kDa protein 4L	Hspa4l	0	0	0	13006000	0	0	0	10634000	12710000
Q8C8D6;F6ZM03;G3UWY0;Q8C3X4	Q8C8D6;F6ZM03;G3UWY0;Q8C3X4	Translation factor Guf1, mitochondrial	Guf1	14526000	11689000	0	13006000	0	0	0	14153000	0
B2RXR6;E9QNQ2;J3QK37;J3QNJ4;Q8BYT6;J3QK13	B2RXR6;E9QNQ2	Serine/threonine-protein phosphatase 6 regulatory ankyrin repeat subunit B	Ankrd44	18233000	0	15289000	13241000	0	0	0	10097000	0
D6RJ77;Q9CSB0;Q9CSN5;Q9D3J1;Q9CXG3	D6RJ77;Q9CSB0;Q9CSN5;Q9D3J1;Q9CXG3	Peptidyl-prolyl cis-trans isomerase-like 4	Ppil4	15867000	15024000	12111000	13292000	0	0	0	0	11249000
Q8BX02	Q8BX02	KN motif and ankyrin repeat domain-containing protein 2	Kank2	16777000	16080000	15989000	13508000	0	0	0	0	0
Q8K215	Q8K215	LYR motif-containing protein 4	Lyrm4	0	10245000	15415000	13608000	0	0	14453000	16449000	14846000
Q9QZA0	Q9QZA0	Carbonic anhydrase 5B, mitochondrial	Ca5b	10902000	9660000	8031600	13709000	0	0	0	0	0
A2ALA4;Q62276	A2ALA4;Q62276	Mediator of RNA polymerase II transcription subunit 22	Med22	12951000	0	13990000	13890000	0	0	0	0	0
Q3U1Z9;Q3TEQ6;P41274	Q3U1Z9;Q3TEQ6;P41274	Tumor necrosis factor ligand superfamily member 9	Tnfsf9	12790000	0	0	14003000	0	0	0	0	0
Q8BZ56;Q544B3;P26323;V9GX50	Q8BZ56;Q544B3;P26323;V9GX50	Friend leukemia integration 1 transcription factor	Fli1	0	13161000	18851000	14493000	0	0	15003000	0	0
Q80ZV0	Q80ZV0	Ribonuclease H2 subunit B	Rnaseh2b	13160000	15910000	17102000	14530000	0	0	0	0	0
D3Z6I4;Q921W4;D3YU21;D3YZD6;F7BGV1	D3Z6I4;Q921W4;D3YU21;D3YZD6	Quinone oxidoreductase-like protein 1	Cryzl1	17263000	11538000	0	14889000	0	0	0	0	0
D3Z6W2;Q06180	D3Z6W2;Q06180	Tyrosine-protein phosphatase non-receptor type;Tyrosine-protein phosphatase non-receptor type 2	Ptpn2	17350000	0	33030000	15125000	0	0	0	15618000	0
Q60770;A2AEC9;Q45Z54	Q60770;A2AEC9;Q45Z54	Syntaxin-binding protein 3	Stxbp3;Stxbp3a;Stxbp3b	0	0	17894000	15960000	0	0	16515000	0	0
Q8BUZ9;Q3U224;E9Q2I4	Q8BUZ9;Q3U224;E9Q2I4		Elmsan1	0	0	0	16022000	0	0	0	0	14138000
Q3U0J8;A0A087WRL5	Q3U0J8;A0A087WRL5	TBC1 domain family member 2B	Tbc1d2b	0	27352000	0	16255000	0	0	0	0	0
Q9D375;Q8R2Y0	Q9D375;Q8R2Y0	Monoacylglycerol lipase ABHD6	Abhd6	16237000	0	11937000	16300000	0	0	0	0	0
Q5H8C4;Q6P6M9;Q8CDS8	Q5H8C4	Vacuolar protein sorting-associated protein 13A	Vps13a	0	19889000	0	16338000	0	0	0	0	0
Q8CAK3;Q3U076	Q8CAK3;Q3U076	UPF0515 protein C19orf66 homolog	A230050P20Rik	10149000	0	0	16394000	0	0	0	0	0
A2AKG8;E9PYJ6;Q80T90	A2AKG8;E9PYJ6	Focadhesin	Focad	19029000	17287000	42695000	16479000	0	0	14742000	22720000	0
Q3TV70	Q3TV70	Nuclear receptor 2C2-associated protein	Nr2c2ap	18911000	14624000	14735000	16688000	0	0	0	13727000	12327000
Q9QWV9;E9Q7A7	Q9QWV9;E9Q7A7	Cyclin-T1	Ccnt1	0	0	10502000	16741000	0	0	0	0	0
D3Z723;Q9D056;Q3U1S7;Q8C590;P63139	D3Z723;Q9D056;Q3U1S7;Q8C590;P63139	Nuclear transcription factor Y subunit beta	Nfyb	21993000	0	16292000	16775000	0	0	0	13642000	16839000
Q8VI84	Q8VI84	Nucleolar complex protein 3 homolog	Noc3l	14030000	0	0	17596000	0	0	0	0	0
Q9JIQ4;Q9ET42;Q9JIQ5;Q6NV52;Q99LH8;Q9JJ11	Q9JIQ4;Q9ET42;Q9JIQ5;Q6NV52;Q99LH8;Q9JJ11	Transforming acidic coiled-coil-containing protein 3	Tacc3	10207000	0	14658000	17756000	0	0	14156000	0	0
E9PXG9;Q3UDN2;Q3TX19;Q3TLZ3;Q3TJT1;Q8CCB4;E9PYD3;F6Z4G7;E9Q648	E9PXG9;Q3UDN2;Q3TX19;Q3TLZ3;Q3TJT1;Q8CCB4;E9PYD3	Vacuolar protein sorting-associated protein 53 homolog	Vps53	13969000	17621000	24254000	18598000	0	0	0	22947000	14351000
P16546	P16546	Spectrin alpha chain, non-erythrocytic 1	Sptan1	22030000	0	21698000	18930000	0	0	20625000	0	19132000
Q9D6E8;Q8VCL2	Q9D6E8;Q8VCL2	Protein SCO2 homolog, mitochondrial	Sco2	0	0	15813000	19094000	0	0	0	0	0
P70280	P70280	Vesicle-associated membrane protein 7	Vamp7	22785000	26529000	20706000	19105000	0	0	0	31787000	29468000
Q9DCT1;Q8CEB6	Q9DCT1	1,5-anhydro-D-fructose reductase	Akr1e2	28654000	20302000	30033000	19123000	0	0	0	23278000	20374000
Q3U425;Q8K3Z9;Q6A036;H7BX32	Q3U425;Q8K3Z9;Q6A036;H7BX32	Nuclear envelope pore membrane protein POM 121	Pom121;mKIAA0618	24174000	25362000	28510000	19281000	0	0	0	0	0
D3YUS5;Q0VAV5;E9PW37;Q52KF5;F6QQP6;F6RK07;A2AUX5;A2AUX3;B7ZD29;Q3U2G7;Q3UHC7	D3YUS5;Q0VAV5;E9PW37;Q52KF5;F6QQP6;F6RK07;A2AUX5;A2AUX3;B7ZD29;Q3U2G7;Q3UHC7	Disabled homolog 2-interacting protein	Rasal2;Dab2ip	0	0	0	19444000	0	0	0	20155000	21380000
Q91UZ1;A2AT91;Q5FWA6;V9GXQ9;Q6P8L2;Q8BXH1;Q9Z2T3;A2AT93	Q91UZ1;A2AT91;Q5FWA6;V9GXQ9;Q6P8L2	Phosphoinositide phospholipase C	Plcb4	16033000	15078000	0	19799000	0	0	24407000	18359000	23851000
P97868;A0PJG9;D3YZU8	P97868	E3 ubiquitin-protein ligase RBBP6	Rbbp6	19118000	15098000	18004000	19871000	0	0	17360000	20215000	25962000
Q3TTY6;Q3UX93;O88952;Q3TS99;Q3TUM0;O88951;Q8JZS0	Q3TTY6;Q3UX93;O88952;Q3TS99	Protein lin-7 homolog C	Lin7c	16978000	20074000	22019000	20028000	0	0	9870900	22790000	14896000
D3Z7A7;Q6ZPF4;O08548	D3Z7A7;Q6ZPF4;O08548	Formin-like protein 3	Fmnl3	0	0	0	20426000	0	0	0	0	16622000
Q8CBJ0;Q8BR50;Q543X3;Q9Z0D9	Q8CBJ0;Q8BR50;Q543X3;Q9Z0D9	CX3C chemokine receptor 1	Cx3cr1	14132000	14351000	23939000	20885000	0	0	0	0	16449000
Q3TR91;O88845	Q3TR91;O88845	A-kinase anchor protein 10, mitochondrial	Akap10	19170000	14238000	13032000	21041000	0	0	10763000	15528000	15290000
B7ZMP1	B7ZMP1	Probable Xaa-Pro aminopeptidase 3	Xpnpep3	20687000	24515000	18950000	21445000	0	0	0	0	0
Q14C26;Q9EP72;Q91VV9	Q14C26;Q9EP72;Q91VV9	ER membrane protein complex subunit 7	Emc7	14214000	23285000	19965000	21533000	0	0	23499000	27273000	26864000
Q3THG9;A2A4P3;A2A4P4	Q3THG9;A2A4P3;A2A4P4	Alanyl-tRNA editing protein Aarsd1	Aarsd1;Gm27029	20216000	17567000	16744000	21618000	0	0	20422000	28612000	21431000
Q3UGJ5;Q60790;Q8C6G4	Q3UGJ5;Q60790;Q8C6G4	Ras GTPase-activating protein 3	Rasa3	17753000	25261000	40349000	21934000	0	0	10666000	21634000	23649000
Q9WUV0;D3Z0X3	Q9WUV0;D3Z0X3	Origin recognition complex subunit 5	Orc5	26929000	0	32413000	22284000	0	0	0	0	0
P40201;Q8C7Q2;G3V014;Q9D5K6;Q3USG6	P40201;Q8C7Q2;G3V014;Q9D5K6;Q3USG6	Chromodomain-helicase-DNA-binding protein 1	Chd1	18812000	14957000	0	22422000	0	0	17006000	16218000	0
Q7TN29;Q3UM96	Q7TN29;Q3UM96	Stromal membrane-associated protein 2	Smap2	0	0	19247000	22700000	0	0	0	22062000	0
Q5QNU0;Q3TM09;Q8CEC0;Q8BQF0;Q8CAD9	Q5QNU0;Q3TM09;Q8CEC0;Q8BQF0	Nuclear pore complex protein Nup88	Nup88	23936000	22014000	25850000	22792000	0	0	17669000	24203000	18980000
Q80X95;Q6NTA4;G3UYP1	Q80X95;Q6NTA4	Ras-related GTP-binding protein A;Ras-related GTP-binding protein B	Rraga;Rragb	0	38487000	36737000	23648000	0	0	46867000	37308000	43544000
F6UIS1;Q9CQE7;F6RK81	F6UIS1;Q9CQE7;F6RK81	Endoplasmic reticulum-Golgi intermediate compartment protein 3	Ergic3	13542000	16922000	0	24124000	0	0	0	0	0
Q5EBK7;E9PY85;Q3U5N8;G3UZF1;Q99L28	Q5EBK7;E9PY85;Q3U5N8;G3UZF1;Q99L28	Probable ribosome biogenesis protein RLP24	Rsl24d1;Gm20509	0	0	22746000	24264000	0	0	0	20275000	0
G3X8V5;Q8K2Y0	G3X8V5;Q8K2Y0	RING finger protein 219	Rnf219	0	22220000	0	24545000	0	0	0	23189000	0
Q3UK41;Q8BG30	Q3UK41;Q8BG30	Negative elongation factor A	Nelfa	23275000	18592000	0	24648000	0	0	0	0	0
J3QP80;Q9CQL7	J3QP80;Q9CQL7	MORF4 family-associated protein 1	Gm5814;Mrfap1	0	0	27032000	25071000	0	0	0	24787000	31506000
P62071;Q9CTF6;Q3U1N3;P10833	P62071;Q9CTF6;Q3U1N3;P10833	Ras-related protein R-Ras2;Ras-related protein R-Ras	Rras2;Rras	17390000	24840000	23095000	25947000	0	0	0	0	28479000
Q4FJR4;Q922H2;Q3V250	Q4FJR4;Q922H2;Q3V250	[Pyruvate dehydrogenase (acetyl-transferring)] kinase isozyme 3, mitochondrial	Pdk3	23030000	21322000	18666000	26064000	0	0	26624000	18929000	15373000
Q8C660;Q8C2N1;P58468	Q8C660;Q8C2N1;P58468	Protein FAM207A	Fam207a	18974000	18934000	0	26080000	0	0	0	30489000	30326000
Q9DAP7	Q9DAP7	Histone chaperone ASF1B	Asf1b	13445000	8090800	17097000	26098000	0	0	12261000	14349000	21214000
Q4FK59;P21550;J3QPZ9	Q4FK59;P21550;J3QPZ9	Beta-enolase;Enolase	Eno3	21987000	26276000	16879000	26196000	0	0	23068000	18332000	0
Q8K2Q0	Q8K2Q0	COMM domain-containing protein 9	Commd9	27319000	28422000	27636000	26662000	0	0	24165000	27358000	0
C7G3P2;Q61136;Q8BPG8;Q8C5G1	C7G3P2;Q61136;Q8BPG8	Serine/threonine-protein kinase PRP4 homolog	Prpf4b	30651000	32175000	42356000	28074000	0	0	0	43955000	0
Q6P9P6;Q8BQH0	Q6P9P6	Kinesin-like protein KIF11	Kif11	23730000	21629000	22047000	29165000	0	0	22636000	22575000	17501000
Q7TQ39	Q7TQ39		gag	98179000	96186000	61351000	30568000	0	0	0	0	0
G5E814;Q9D8B4	G5E814;Q9D8B4	NADH dehydrogenase [ubiquinone] 1 alpha subcomplex subunit 11	Ndufa11	0	0	38731000	30811000	0	0	0	0	0
Q05AF0;Q9WV03	Q05AF0;Q9WV03	Protein FAM50A	Fam50a	22970000	29165000	38421000	31203000	0	0	26037000	33635000	24131000
B2RVQ7;Q9D115	B2RVQ7;Q9D115	Zinc finger protein 706	Zfp706;Znf706	20173000	22510000	22592000	31842000	0	0	0	0	16263000
Q5SVF7;Q3UGS1;O55125;Q5SVG6	Q5SVF7;Q3UGS1;O55125;Q5SVG6	Protein NipSnap homolog 1	Nipsnap1	40956000	48588000	33510000	32931000	0	0	32978000	31495000	31053000
A0A068BGR9;Q9Z1P6	A0A068BGR9;Q9Z1P6	NADH dehydrogenase [ubiquinone] 1 alpha subcomplex subunit 7	Ndufa7	0	52265000	41929000	34081000	0	0	0	48026000	0
Q9CQX4	Q9CQX4	PCNA-associated factor	Paf	0	0	29411000	36215000	0	0	25304000	32766000	37541000
Q3TBT3	Q3TBT3	Stimulator of interferon genes protein	Tmem173	68123000	76255000	61146000	56021000	0	0	0	0	0
A0A087WPR7;E9Q9X1;S4R1P5;Q91ZU6;A0A087WRB8;A0A087WSP0	A0A087WPR7;E9Q9X1;S4R1P5;Q91ZU6	Dystonin	Dst	0	0	0	71066000	0	0	0	58910000	147690000
Q8VEH3;F6QKK2	Q8VEH3;F6QKK2	ADP-ribosylation factor-like protein 8A	Arl8a	82527000	89814000	90583000	74379000	0	0	81749000	0	91405000
P04184;Q9R296;Q9WUP9	P04184;Q9R296	Thymidine kinase, cytosolic;Thymidine kinase	Tk1;Tk1b	18531000	18155000	75723000	86489000	0	0	20952000	0	14241000
Q3UXW4;H3BKQ7;Q7TSA7;H3BJD0;Q3UUK5;H3BL28;Q7TN74;H3BJD6;H3BJA6;Q8BMP0;H3BKE7	Q3UXW4;H3BKQ7;Q7TSA7;H3BJD0;Q3UUK5;H3BL28;Q7TN74;H3BJD6;H3BJA6;Q8BMP0;H3BKE7		Ppp1r9a	137660000	0	204790000	114770000	0	0	185390000	412960000	600620000
Q3V2W1;Q3TM13;Q61055;B7ZMZ2;B2RQ57;Q3SYK5;F8VQH0;P00520;Q4JIM5	Q3V2W1;Q3TM13;Q61055;B7ZMZ2;B2RQ57;Q3SYK5;F8VQH0;P00520;Q4JIM5	Non-specific protein-tyrosine kinase;Tyrosine-protein kinase ABL1;Abelson tyrosine-protein kinase 2	Abl1;Abl2	243070000	189580000	227820000	152460000	0	0	171000000	385320000	451380000
Q5PPR2;Q3U1G4;Q6P1Y9;Q8R3S6;G3UVW9	Q5PPR2;Q3U1G4;Q6P1Y9;Q8R3S6;G3UVW9	Exocyst complex component 1	Exoc1	3030100	0	0	3258000	3214400	0	0	0	0
Q3UDN6;Q8CCE6;Q8CD00;B1AW21;Q3TLK7;Q9D4L1;Q9Z2C5	Q3UDN6;Q8CCE6;Q8CD00;B1AW21;Q3TLK7;Q9D4L1;Q9Z2C5	Myotubularin	Mtm1	0	4157600	0	4774800	3354900	0	0	0	0
A0PJ58;A2A6A1	A0PJ58;A2A6A1	G patch domain-containing protein 8	Gpatch8	5992000	6019000	6856100	6064000	4260900	0	5485100	6109500	7306000
Q80VI1	Q80VI1	E3 ubiquitin-protein ligase TRIM56	Trim56	0	0	6920000	6996900	4637000	0	0	0	0
Q811L9;Q3TXU5	Q811L9;Q3TXU5	Deoxyhypusine synthase	Dhps	0	0	0	0	4848800	0	5320000	0	0
Q504M2;Q5DTY5	Q504M2;Q5DTY5		Pdp2	0	0	5308900	7257300	5109000	0	0	7145300	0
Q8K212;Q3TP27;Q3TAB8;Q3V3Y3;E9Q7E9;Q3V3Q7	Q8K212;Q3TP27;Q3TAB8	Phosphofurin acidic cluster sorting protein 1	Pacs1	9112700	10258000	12273000	0	5182400	0	6763400	7965000	10394000
Q9JKZ2;V9GXD5;Q3UMR9;Q3UZU9	Q9JKZ2	Sodium/myo-inositol cotransporter	Slc5a3	20534000	22771000	0	15474000	5231500	0	8200600	0	0
D3Z282;D3YZS5;P97473	D3Z282;D3YZS5;P97473	RISC-loading complex subunit TARBP2	Tarbp2	3519800	0	4016300	0	5421900	0	0	5411200	0
Q8BJ94;Q8K245;Q8C0K8;Q8BXW8;Q8BVI8	Q8BJ94;Q8K245;Q8C0K8;Q8BXW8;Q8BVI8		Uvrag	0	6098300	6642200	0	5750000	0	6932600	7252900	0
D6RFR7;D3Z340;Q3U3Y3;Q3TVI6;Q3TGG0;Q3TB15;Q8K3G9;H3BL43	D6RFR7;D3Z340;Q3U3Y3;Q3TVI6;Q3TGG0;Q3TB15;Q8K3G9;H3BL43	DCC-interacting protein 13-beta	Appl2	11235000	13860000	13120000	11959000	5836800	0	0	7142700	0
Q3TCN5;Q91X51	Q3TCN5;Q91X51	Golgi reassembly-stacking protein 1	Gorasp1	0	0	0	0	5951500	0	0	8548800	0
D3Z0K6	D3Z0K6		Rsbn1l	7794400	7355700	5892200	0	6188600	0	6227200	0	0
B0LM42;F7BGR7;J3QPA9;B7ZN14;A1L3S3;Q8C7Q4	B0LM42;F7BGR7		Gm21992	7893900	3520200	0	0	6190000	0	0	0	0
Q8R3Y8	Q8R3Y8	Interferon regulatory factor 2-binding protein 1	Irf2bp1	0	0	0	7405100	6336900	0	0	0	0
Q9JKL4;A0A0A6YVW1	Q9JKL4;A0A0A6YVW1	NADH dehydrogenase [ubiquinone] 1 alpha subcomplex assembly factor 3	Ndufaf3	5490800	0	0	0	6403700	0	0	0	0
H3BJG4;E9Q512;B2RY51;Q811I5	H3BJG4;E9Q512;B2RY51;Q811I5		Trip11	0	6011500	0	0	6478900	0	0	0	0
Q5SVF9;Q8BKT7;Q5SVF8	Q5SVF9;Q8BKT7;Q5SVF8	THO complex subunit 5 homolog	Thoc5	8553800	7671600	9404100	8060900	6689900	0	0	7111000	0
D3Z1T8;D3Z767;Q9D6K7	D3Z1T8;D3Z767;Q9D6K7	Tetratricopeptide repeat protein 33	Ttc33	14257000	12747000	13151000	15295000	6796100	0	11468000	0	9223300
J3QNY6;Q9QY30	J3QNY6;Q9QY30	Bile salt export pump	Abcb11	0	5088900	0	5228700	7000200	0	0	5072400	0
Q9CXL3	Q9CXL3	Uncharacterized protein C7orf50 homolog		7865300	9838000	0	0	7146000	0	0	5019000	6894700
Q3U5L4;P17433	Q3U5L4;P17433	Transcription factor PU.1	Spi1	10180000	4964200	9266800	0	7274000	0	8905100	5278000	0
Q3TS50	Q3TS50		Hnrnpu	9011700	7373900	0	9339600	7434700	0	0	5346800	0
Q91YR6;Q8CFB8;Q3UGL7;Q8BXU2;Q3ULW8;E9Q992;E9PX17	Q91YR6;Q8CFB8;Q3UGL7;Q8BXU2;Q3ULW8;E9Q992;E9PX17		Parp3	4279900	0	0	0	7610700	0	6428700	0	5474200
Q8BGK6	Q8BGK6	Y+L amino acid transporter 2	Slc7a6	11211000	11465000	8892100	0	7635600	0	0	0	12867000
B2RUJ2;B7ZNY4;B7ZNX6;B2RUK2;Q80TH2	B2RUJ2;B7ZNY4;B7ZNX6;B2RUK2;Q80TH2	Protein LAP2	Erbb2ip	10040000	7705700	8714400	9279800	7727200	0	10246000	9369900	0
E0CZ78;P48453;E9Q6P2;G3X8U7;Q3UXV4	E0CZ78;P48453;E9Q6P2;G3X8U7;Q3UXV4	Serine/threonine-protein phosphatase;Serine/threonine-protein phosphatase 2B catalytic subunit beta isoform	Ppp3cb	10425000	14496000	8580600	13945000	7745400	0	9200400	13971000	11209000
Q8C551	Q8C551	RAD51-associated protein 1	Rad51ap1	0	0	10599000	9092700	7755000	0	9427700	0	0
Q790L7;P25322;Q3TC96;B2M0W7	Q790L7;P25322;Q3TC96	G1/S-specific cyclin-D1	Ccnd1	11219000	6660000	0	10611000	7832700	0	17998000	0	17206000
P49070	P49070	Calcium signal-modulating cyclophilin ligand	Camlg	0	5634400	0	0	7911100	0	6426900	5115800	0
Q3UFY8	Q3UFY8	Mitochondrial ribonuclease P protein 1	Trmt10c	7417000	8366700	7651100	7943400	8012500	0	0	0	0
Q9JJ89	Q9JJ89	Coiled-coil domain-containing protein 86	Ccdc86	8167100	9159100	0	9197900	8171800	0	0	11099000	11954000
Q9CWX4	Q9CWX4	RNA pseudouridylate synthase domain-containing protein 4	Rpusd4	8454800	11436000	0	9642800	8181900	0	0	9193300	8733700
Q9ESC4;Q9ESC5;Q9CZU4;Q8R4A7	Q9ESC4;Q9ESC5;Q9CZU4;Q8R4A7	GTPase Era, mitochondrial	Eral1;Era	0	0	0	0	8379500	0	0	0	6695000
Q9CQU5	Q9CQU5	ZW10 interactor	Zwint	0	0	5872400	9146500	8673200	0	0	11355000	0
E9QJV4;A0PJ46;Q8K2Z2	E9QJV4;A0PJ46;Q8K2Z2	Pre-mRNA-processing factor 39	Prpf39	11276000	12792000	8658100	8189500	8752600	0	8885000	0	0
Q8BHL3	Q8BHL3	TBC1 domain family member 10B	Tbc1d10b	0	7793900	9291200	0	8816200	0	0	0	11892000
G3X9Q4;Q99M01	G3X9Q4;Q99M01	Phenylalanine--tRNA ligase, mitochondrial	Fars2	0	11111000	0	0	8849300	0	0	0	0
G5E8X1;Q9DCS2;E9Q5B2;E9Q7K5	G5E8X1;Q9DCS2;E9Q5B2;E9Q7K5	UPF0585 protein C16orf13 homolog	0610011F06Rik	14914000	0	7772300	0	8948100	0	0	8828100	0
Q3TCZ2;Q3UJY1;Q9JIM1;E9PXM6;A8VP81	Q3TCZ2;Q3UJY1;Q9JIM1	Equilibrative nucleoside transporter 1	Slc29a1	0	0	12434000	10656000	9448800	0	7093700	0	0
Q9DD02;G5E8I4;D3YU13	Q9DD02;G5E8I4;D3YU13	Protein Hikeshi	L7rn6;l7Rn6	0	14130000	11428000	0	9483800	0	0	0	0
Q3TPE9	Q3TPE9	Ankyrin repeat and MYND domain-containing protein 2	Ankmy2	8747400	10652000	13772000	8536500	9611500	0	8789800	0	0
Q920Q8;Q06BK5;A0A087WQT3	Q920Q8;Q06BK5	Influenza virus NS1A-binding protein homolog	Ivns1abp	9547900	0	8937100	12375000	9727600	0	9282800	0	0
Q8BMS9;A2APB1	Q8BMS9	Ras association domain-containing protein 2	Rassf2	0	16040000	14016000	14602000	9814600	0	9396500	12922000	0
Q99LX5	Q99LX5	Multiple myeloma tumor-associated protein 2 homolog	Mmtag2	0	0	0	14210000	9853500	0	0	0	0
Q9D0L4	Q9D0L4	Uncharacterized aarF domain-containing protein kinase 1	Adck1	0	0	0	0	9914700	0	9386900	11761000	0
Q8BX36;A2AJG0;Q80UU2	Q8BX36;A2AJG0;Q80UU2	Ribonuclease P protein subunit p38	Rpp38	11620000	9934200	10934000	11281000	10038000	0	13622000	13918000	0
Q9TQB1;Q3V014;O98032;P06339;Q9TQM0;Q9TQL9;Q4FZH9;A7VMS5	Q9TQB1;Q3V014;O98032;P06339;Q9TQM0;Q9TQL9;Q4FZH9;A7VMS5	H-2 class I histocompatibility antigen, D-37 alpha chain	H2-T23	0	0	0	0	10376000	0	17993000	0	0
Q9D7E4	Q9D7E4	UPF0449 protein C19orf25 homolog		19499000	12213000	15744000	13115000	10657000	0	17412000	0	14769000
Q3UR94;Q80XH7;Q9WVF7;Q3UPI9;Q8CD66	Q3UR94;Q80XH7;Q9WVF7;Q3UPI9	DNA polymerase;DNA polymerase epsilon catalytic subunit A	Pole	0	8088700	11253000	9165300	10675000	0	0	0	0
Q9Z0U1	Q9Z0U1	Tight junction protein ZO-2	Tjp2	9910700	11056000	10905000	12610000	10813000	0	11834000	10040000	11492000
Q6DFV1;Q3UU24	Q6DFV1	Condensin-2 complex subunit G2	Ncapg2	0	0	0	0	10882000	0	0	9805100	11652000
A0A0A6YVR2;Q8BVG3;Q9CPV5	A0A0A6YVR2;Q8BVG3;Q9CPV5	Polyamine-modulated factor 1	Pmf1	0	0	0	18328000	10961000	0	9552100	0	0
Q3UE37	Q3UE37	Ubiquitin-conjugating enzyme E2 Z	Ube2z	0	0	14592000	0	11100000	0	0	21830000	22685000
Q5SS80;B0QZT2;Q5SS84	Q5SS80;B0QZT2	Dehydrogenase/reductase SDR family member 13	Dhrs13	7296500	0	0	8419600	11223000	0	0	10899000	0
E9Q4Z2;Q8R5C9;Q3UHC8	E9Q4Z2;Q8R5C9;Q3UHC8	Acetyl-CoA carboxylase 2;Biotin carboxylase	Acacb	0	0	12511000	0	11300000	0	13871000	0	0
Q8BJ05	Q8BJ05	Zinc finger CCCH domain-containing protein 14	Zc3h14	0	14220000	15151000	13961000	11461000	0	0	13679000	0
Q3TRI4;Q3UHW0;E9Q6M7;Q3TTW5;Q3U4T5;Q3TQ21;Q3UR00;Q80U78;A8WHM8	Q3TRI4;Q3UHW0;E9Q6M7;Q3TTW5;Q3U4T5;Q3TQ21;Q3UR00;Q80U78	Pumilio homolog 1	Pum1	12117000	13150000	11919000	14003000	11490000	0	12777000	11061000	13258000
P0C7N9	P0C7N9	Proteasome assembly chaperone 4	Psmg4	0	0	10297000	9979300	11498000	0	0	10416000	11375000
Q8CI32	Q8CI32	BAG family molecular chaperone regulator 5	Bag5	13060000	10156000	0	6287500	11580000	0	8105400	6145600	0
Q8R3W2;Q5J9A9;Q9CQP2	Q8R3W2;Q5J9A9;Q9CQP2	Trafficking protein particle complex subunit 2	0610009B22Rik;Trappc2	13360000	0	0	15414000	11648000	0	12576000	0	15402000
Q9DCZ1;F6VY18	Q9DCZ1;F6VY18	GMP reductase 1	Gmpr	12246000	9451000	11524000	15494000	11728000	0	0	0	0
A2AV19;Q3TKQ3;Q8VBV3	A2AV19;Q3TKQ3;Q8VBV3	Exosome complex component RRP4	Exosc2	11372000	11386000	13885000	14364000	11954000	0	12514000	0	0
Q3UM18;F7AMG0	Q3UM18	Large subunit GTPase 1 homolog	Lsg1	10955000	10984000	0	12530000	12011000	0	0	0	0
Q8CD10	Q8CD10	Calcium uptake protein 2, mitochondrial	Micu2	0	0	0	0	12159000	0	0	11922000	13743000
O89032	O89032	SH3 and PX domain-containing protein 2A	Sh3pxd2a	11171000	16643000	11118000	15868000	12337000	0	0	0	10690000
I6RAM3;E9Q088;A5YBK2;G3X8U8;O88622;Q3TUI8;E9Q7T9	I6RAM3;E9Q088;A5YBK2;G3X8U8;O88622;Q3TUI8	Poly(ADP-ribose) glycohydrolase	Parg	0	0	13472000	0	12462000	0	0	18964000	0
P70697	P70697	Uroporphyrinogen decarboxylase	Urod	0	25972000	18464000	24910000	12486000	0	14391000	0	8698900
Q8CII2	Q8CII2	Cell division cycle protein 123 homolog	Cdc123	14464000	0	0	17403000	12534000	0	17295000	0	0
Q0P5W2;Q8C0L0;A2ARI0	Q0P5W2;Q8C0L0;A2ARI0	Thioredoxin-related transmembrane protein 4	Tmx4	0	0	0	9941500	12564000	0	0	15510000	0
B1ARC5;B1ARC2;Q8BWY7	B1ARC5;B1ARC2;Q8BWY7	Zinc transporter ZIP11	Slc39a11	0	0	0	0	12584000	0	0	15809000	0
Q8BTL4;Q548Y4;Q3U3Q8;Q04207;A4L9Q2;Q4U113	Q8BTL4;Q548Y4;Q3U3Q8;Q04207	Transcription factor p65	Rela	16759000	17413000	11629000	0	12668000	0	16011000	11659000	21615000
D3YWS7;F6SJM7;Q8R2K1;F6X9P4	D3YWS7;F6SJM7;Q8R2K1;F6X9P4	Fucose mutarotase	Fuom	10496000	15570000	11593000	0	12677000	0	11201000	0	0
A2AMH3;A2AMH5;A2AMH4;Q6X893;A2AMH8	A2AMH3;A2AMH5;A2AMH4;Q6X893	Choline transporter-like protein 1	Slc44a1	21137000	0	19663000	20078000	12721000	0	20293000	14910000	0
A0A068WAZ7;A2A839;A2A838;B6ZHC8;A2A841;P48193;A2A842;Q3V048;F7BUB8;B6ZHC3;A2AD32;Q3U0G7;F7CR30;Q3UH12	A0A068WAZ7;A2A839;A2A838;B6ZHC8;A2A841;P48193;A2A842;Q3V048;F7BUB8	Protein 4.1	Epb4.1;Epb41	0	18868000	18666000	12179000	13100000	0	0	17581000	17125000
O89001	O89001	Carboxypeptidase D	Cpd	23835000	19108000	18583000	24685000	13138000	0	12936000	0	0
Q3TEF2;Q8C142	Q3TEF2;Q8C142	Low density lipoprotein receptor adapter protein 1	Ldlrap1	13199000	11086000	12372000	17234000	13351000	0	9903100	0	0
Q8BG20;V9GXP1;Q9CWQ0	Q8BG20;V9GXP1;Q9CWQ0	Diphthine synthase	Dph5	11940000	0	12161000	0	13390000	0	0	0	0
Q8VE80	Q8VE80	THO complex subunit 3	Thoc3	10534000	0	0	13501000	13678000	0	12662000	0	0
Q8K3H1;E9Q2U4;E9Q6K7;F7A8R0;Q6PHQ8	Q8K3H1;E9Q2U4;E9Q6K7;F7A8R0;Q6PHQ8	N-alpha-acetyltransferase 35, NatC auxiliary subunit	Naa35	0	0	0	7999400	13840000	0	0	0	0
Q9CPW3	Q9CPW3	39S ribosomal protein L54, mitochondrial	Mrpl54	20953000	18449000	13989000	23063000	13923000	0	0	0	15249000
A3KG44;Q8VC91;E9Q2Y3;Q7TSS3;O88522;A3KG40;A3KG41;Q3UG24;A3KG38	A3KG44;Q8VC91;E9Q2Y3;Q7TSS3;O88522;A3KG40;A3KG41;Q3UG24;A3KG38	NF-kappa-B essential modulator	Ikbkg	17838000	15624000	0	19097000	13968000	0	0	0	0
E3WH32;A0A0A0MQ99;V9GXX7;Q8K3D3	E3WH32;A0A0A0MQ99;V9GXX7;Q8K3D3	DNA repair protein SWI5 homolog	Swi5	15196000	14703000	18048000	19594000	14321000	0	15890000	16903000	16001000
Q8BK30	Q8BK30	NADH dehydrogenase [ubiquinone] flavoprotein 3, mitochondrial	Ndufv3	17135000	15963000	18046000	12444000	14352000	0	8512700	0	15119000
Q8VEH6	Q8VEH6	COBW domain-containing protein 1	Cbwd1	10173000	0	10192000	0	14464000	0	0	0	0
B2RTL5;P24549;O35945	B2RTL5;P24549;O35945	Retinal dehydrogenase 1;Aldehyde dehydrogenase, cytosolic 1	Aldh1a7;Aldh1a1	14545000	0	0	0	14628000	0	0	0	0
Q9CQF0	Q9CQF0	39S ribosomal protein L11, mitochondrial	Mrpl11	23142000	27440000	22433000	21525000	14636000	0	0	0	20312000
E9Q186;Q9CTH6	E9Q186;Q9CTH6	rRNA-processing protein FCF1 homolog	Fcf1	0	18092000	18241000	22807000	15022000	0	0	20957000	23248000
I6L9D3;Q8K0D0;Q0VDL6;Q04899;Q8C5H7	I6L9D3;Q8K0D0;Q0VDL6;Q04899	Cyclin-dependent kinase 17;Cyclin-dependent kinase 18	Pctk2;Cdk17;Cdk18	0	10499000	6440000	0	15039000	0	0	0	0
Q3UND0	Q3UND0	Src kinase-associated phosphoprotein 2	Skap2	0	7630100	0	0	15236000	0	16810000	0	0
Q4G5Y4;Q3TUI3;Q8K2F0;Q05DR7;Q5CCJ9;Q3U3Z2;Q3SYK2;B0V2V6;Q63ZX2;A2AKA9;B2RSE4;B0V2V8;Q3UH70;Q9ESU6;Q53TY6	Q4G5Y4;Q3TUI3;Q8K2F0;Q05DR7;Q5CCJ9;Q3U3Z2;Q3SYK2;B0V2V6;Q63ZX2;A2AKA9;B2RSE4;B0V2V8;Q3UH70;Q9ESU6	Bromodomain-containing protein 3;Bromodomain-containing protein 4	Brd3;Brd4	23597000	22811000	21296000	27298000	15333000	0	16343000	30433000	32273000
Q6P3A8;Q3TPB2	Q6P3A8;Q3TPB2	2-oxoisovalerate dehydrogenase subunit beta, mitochondrial	Bckdhb	27020000	19366000	19786000	21097000	15513000	0	0	0	0
D6RDC1;D6RIR0;D6RFP3;Q8K1A5	D6RDC1;D6RIR0;D6RFP3;Q8K1A5	Transmembrane protein 41B	Tmem41b	0	0	0	0	15874000	0	0	27973000	0
D3YZP9	D3YZP9	Coiled-coil domain-containing protein 6	Ccdc6	0	0	18254000	17424000	16101000	0	21326000	20643000	21771000
Q5SFM8	Q5SFM8	RNA-binding protein 27	Rbm27	15617000	0	17744000	15405000	16485000	0	14346000	17682000	17638000
E9Q421;Q8BXX3;Q3TGN0;Q8BL63;Q9CXY9;Q3TUE9;Q80V43	E9Q421;Q8BXX3;Q3TGN0;Q8BL63;Q9CXY9;Q3TUE9;Q80V43	GPI-anchor transamidase	Pigk	0	10515000	0	7339500	16694000	0	8970000	9457700	13679000
Q8BX26;B7ZNE1;B2RR29;Q8BUM3	Q8BX26;B7ZNE1;B2RR29;Q8BUM3	Protein-tyrosine-phosphatase;Tyrosine-protein phosphatase non-receptor type 7	Ptpn7	19206000	0	20621000	26577000	16871000	0	27765000	18492000	21913000
G3X920;Q9DBR3	G3X920;Q9DBR3	Armadillo repeat-containing protein 8	Armc8	0	14705000	12908000	0	17538000	0	14693000	0	14837000
V9GXJ9;F6WIU1;Q8VDQ9	V9GXJ9;F6WIU1;Q8VDQ9	Protein KRI1 homolog	Kri1	0	19670000	0	0	18010000	0	18471000	21287000	0
Q9CTE8;Q9DB25;D6RCG2;Q9D0Q9	Q9CTE8;Q9DB25;D6RCG2;Q9D0Q9	Dolichyl-phosphate beta-glucosyltransferase	Alg5	25664000	32482000	33196000	22867000	18142000	0	18616000	46440000	34833000
Q8R123;F8WGX4;E0CZ66	Q8R123;F8WGX4	FAD synthase;Molybdenum cofactor biosynthesis protein-like region;FAD synthase region	Flad1	15693000	19741000	0	0	18252000	0	0	0	0
A8Y5E9;B2KGA7;Q505B7	A8Y5E9;B2KGA7;Q505B7	Protein archease	Zbtb8os	27863000	25269000	20571000	0	18308000	0	0	16791000	19335000
G3UVU9;F6VRF7;F6VMC4;A4FUU3;B2WTI1;B2WTI2;Q9ERI5	G3UVU9;F6VRF7;F6VMC4;A4FUU3;B2WTI1;B2WTI2;Q9ERI5	Bifunctional arginine demethylase and lysyl-hydroxylase JMJD6	Jmjd6	0	0	0	20180000	19143000	0	22822000	23063000	20907000
D6RFN5;Q8BP68;Q3TXT8;D3YW25;O70131	D6RFN5;Q8BP68;Q3TXT8;D3YW25;O70131	Ninjurin-1	Ninj1	14014000	0	11624000	14349000	19291000	0	0	10101000	13416000
Q14B21;Q99N94;Q8CA04;Q3UK02	Q14B21;Q99N94;Q8CA04;Q3UK02	39S ribosomal protein L9, mitochondrial	Mrpl9	24799000	24953000	19187000	23755000	19293000	0	17298000	17361000	20986000
Q921E6	Q921E6	Polycomb protein EED	Eed	0	0	21010000	21722000	19502000	0	0	23114000	23053000
Q3TLI6;Q59J78	Q3TLI6;Q59J78	Mimitin, mitochondrial	Ndufaf2	39835000	29374000	28116000	30952000	20100000	0	42570000	21391000	28660000
Q78ZC4;P50295;Q921E5	Q78ZC4;P50295;Q921E5	Arylamine N-acetyltransferase 2	Nat2	18574000	0	0	0	20190000	0	18679000	12069000	19518000
Q3TNL9;Q4JFN6;G3EB90;A0A075DCA9;P03888	Q3TNL9;Q4JFN6;G3EB90;A0A075DCA9;P03888	NADH-ubiquinone oxidoreductase chain 1	mt-Nd1;ND1;Mtnd1	0	43620000	35371000	33023000	20427000	0	0	0	0
Q8VC30;Q3UTZ4	Q8VC30;Q3UTZ4	Bifunctional ATP-dependent dihydroxyacetone kinase/FAD-AMP lyase (cyclizing);ATP-dependent dihydroxyacetone kinase;FAD-AMP lyase (cyclizing)	Dak	14796000	25029000	0	0	20669000	0	34956000	0	0
E9Q5D6;P69566	E9Q5D6;P69566	Ran-binding protein 9	Ranbp9	0	0	0	17702000	20799000	0	0	0	0
P13011;Q3UXG5;Q8BNZ5;Q547C4;Q99PL7;Q3UWK5;P13516	P13011;Q3UXG5;Q8BNZ5;Q547C4;Q99PL7;Q3UWK5;P13516	Acyl-CoA desaturase 2;Acyl-CoA desaturase 1	Scd2;Scd1;Scd3	0	23234000	43511000	40297000	21349000	0	25250000	0	0
E9QN92;D3YTP0;Q8CI59;Q924Z2	E9QN92;D3YTP0;Q8CI59	Metalloreductase STEAP3	Steap3	18297000	0	24235000	25189000	21963000	0	0	23222000	21566000
Q8VDS4	Q8VDS4	Regulation of nuclear pre-mRNA domain-containing protein 1A	Rprd1a	0	0	22275000	30384000	21974000	0	0	24365000	0
A7VMV2;Q99KP3;Q9D221	A7VMV2;Q99KP3	Lambda-crystallin homolog	Cryl1	25667000	24550000	21258000	16450000	21999000	0	16913000	0	20111000
A2A6H1	A2A6H1		Lasp1	0	27224000	0	0	23208000	0	26497000	92359000	107810000
A0A0A6YWM5;E9QKE4;Q8BMG7;Q3UEY3	A0A0A6YWM5;E9QKE4;Q8BMG7	Rab3 GTPase-activating protein non-catalytic subunit	Rab3gap2	17087000	21855000	0	0	23794000	0	0	0	0
E0CY72;E0CYA7;P0CB42	E0CY72;E0CYA7;P0CB42	Alkylated DNA repair protein alkB homolog 1	Alkbh1	20368000	29134000	15004000	21592000	24066000	0	0	0	0
Q9EPL9;Q3TAW3;Q8C178;E9Q296;D3Z2N6	Q9EPL9;Q3TAW3;Q8C178;E9Q296	Peroxisomal acyl-coenzyme A oxidase 3;Acyl-coenzyme A oxidase	Acox3	25845000	32573000	28968000	13974000	24791000	0	0	22564000	21268000
Q80W49	Q80W49	Beta/gamma crystallin domain-containing protein 3	Crybg3	0	0	0	0	24831000	0	36474000	0	0
Q9CZS7;Q544E3;O70172;F6RJE8	Q9CZS7;Q544E3;O70172;F6RJE8	Phosphatidylinositol 5-phosphate 4-kinase type-2 alpha	Pip4k2a	0	0	39481000	23270000	25029000	0	0	27940000	28915000
E9QJS0;Q501J4;G5E8U8;G5E8U5;Q80ZK0;Q3UVS8;D3Z6K5	E9QJS0;Q501J4;G5E8U8;G5E8U5;Q80ZK0	28S ribosomal protein S10, mitochondrial	Mrps10	25793000	19664000	20830000	16543000	25582000	0	23375000	0	13851000
Q9DC37	Q9DC37	Major facilitator superfamily domain-containing protein 1	Mfsd1	0	26945000	0	0	25916000	0	0	0	20935000
Q91ZE0	Q91ZE0	Trimethyllysine dioxygenase, mitochondrial	Tmlhe	37806000	36591000	30174000	23011000	26147000	0	0	0	0
Q7TN25;G3UVU2;Q62203;D3YW09;D3Z5A6	Q7TN25;G3UVU2;Q62203;D3YW09	Splicing factor 3A subunit 2	Sf3a2	22501000	27162000	35790000	27665000	26851000	0	0	26745000	31293000
Q32MD7;Q9CQE5;D3Z1B6	Q32MD7;Q9CQE5	Regulator of G-protein signaling 10	Rgs10	46918000	49023000	55622000	51015000	26976000	0	32995000	40790000	32992000
Q8CCG5;Q9JIW9;F6QC68	Q8CCG5;Q9JIW9	Ras-related protein Ral-B	Ralb	0	25631000	27994000	28307000	27720000	0	32581000	19737000	23915000
Q3TXN1;Q8VDQ1;D6RGL6	Q3TXN1;Q8VDQ1	Prostaglandin reductase 2	Ptgr2	42111000	43280000	38502000	37665000	28589000	0	0	0	34157000
D3Z6S1;Q8BM55	D3Z6S1;Q8BM55	Transmembrane protein 214	Tmem214	0	31516000	34606000	0	30945000	0	30829000	39226000	36732000
O35114	O35114	Lysosome membrane protein 2	Scarb2	0	0	0	0	32063000	0	0	32728000	0
Q3UL09;Q8BPN4;P34056	Q3UL09;Q8BPN4;P34056	Transcription factor AP-2-alpha	Tfap2a	62216000	30167000	174750000	45087000	32745000	0	79159000	333130000	514670000
Q9JJT0;Q3THS8	Q9JJT0;Q3THS8	RNA 3-terminal phosphate cyclase-like protein	Rcl1	31268000	0	27406000	27425000	34229000	0	29934000	27633000	28572000
Q3UZJ4;Q61151;A0PJ98;Q8R342;Q6PD28;Q3V3S8	Q3UZJ4;Q61151	Serine/threonine-protein phosphatase 2A 56 kDa regulatory subunit epsilon isoform	Ppp2r5e	0	0	0	0	35114000	0	23315000	28431000	0
D3Z7C0;Q3UKS6;Q9Z2Q5	D3Z7C0;Q3UKS6;Q9Z2Q5	39S ribosomal protein L40, mitochondrial	Mrpl40	47902000	40815000	38735000	33244000	35829000	0	46301000	54509000	52057000
Z4YJU8;Q5DTL1;E9PUQ5;Q921M4;A2AN45;A2AN48;A2AN46	Z4YJU8;Q5DTL1;E9PUQ5;Q921M4	Golgin subfamily A member 2	Golga2	21242000	20218000	0	19284000	36524000	0	22956000	0	19440000
K3W4P2;Q6P4S8;Q0KK53;Q3U1N8	K3W4P2;Q6P4S8;Q0KK53	Integrator complex subunit 1	Ints1;KIAA1440	0	71537000	23501000	0	36976000	0	0	0	0
M0QWF0;Q9JMD0	M0QWF0;Q9JMD0	BUB3-interacting and GLEBS motif-containing protein ZNF207	Zfp207;Znf207	31910000	0	36584000	38076000	37509000	0	36963000	39747000	36218000
Q3TVD9;Q99MR8	Q3TVD9;Q99MR8	Methylcrotonoyl-CoA carboxylase subunit alpha, mitochondrial	Mccc1	34805000	40508000	38448000	30697000	38366000	0	37424000	0	29685000
Q5M9J2;Q9D0S9	Q5M9J2;Q9D0S9	Histidine triad nucleotide-binding protein 2, mitochondrial	Hint2	39981000	37849000	30595000	0	39877000	0	27819000	36779000	41746000
Q80VJ3	Q80VJ3	2-deoxynucleoside 5-phosphate N-hydrolase 1	Dnph1	36085000	36833000	55185000	0	40540000	0	48277000	0	36301000
Q3UG45;Q3UQM7;Q9Z127	Q3UG45;Q3UQM7;Q9Z127	Large neutral amino acids transporter small subunit 1	Slc7a5	36384000	40122000	32756000	0	45036000	0	0	0	41038000
Q3UFY7	Q3UFY7	7-methylguanosine phosphate-specific 5-nucleotidase	Nt5c3b	48759000	44868000	0	46858000	46805000	0	50755000	0	0
Q3U7N2	Q3U7N2		Immt	0	0	49142000	0	47038000	0	0	0	0
Q8CG76	Q8CG76	Aflatoxin B1 aldehyde reductase member 2	Akr7a2	49158000	42394000	53223000	42026000	47294000	0	41757000	0	0
E9PXG1;G5E8Z4;Q8VCS9;P31651;Q8CF74;D3YWZ5;Q8BRX2;Q99NG2;F6UKB4;Q3UEF3;Q8R2I2;Q6NZB4;Q9R0X6;Q9JJ41;Q8C009;Q3UVW5;Q3UPI8;E9Q151;A2ALM6;P31649;O55192;Q61327;O35316;Q8VBW1	E9PXG1;G5E8Z4;Q8VCS9;P31651	Transporter;Sodium- and chloride-dependent betaine transporter	Slc6a12	91305000	104270000	60846000	91623000	47883000	0	53578000	67887000	67560000
B9EHE8;E9Q9Q2;A0A087WP65;A0A087WQI5;Q80U91;A0A087WPF0;Q80ZH9	B9EHE8;E9Q9Q2;A0A087WP65;A0A087WQI5;Q80U91;A0A087WPF0;Q80ZH9		R3hdm1	0	0	0	0	52471000	0	0	0	46762000
Q6ZWY7;Q9WU28;H7BWX1;E9PVG3;E9PZ62;E9Q093;Q9DAJ0	Q6ZWY7;Q9WU28;H7BWX1;E9PVG3;E9PZ62	Prefoldin subunit 5	Pfdn5	68975000	0	50566000	71746000	64904000	0	0	38448000	43228000
Q9CTT4;Q923F9;E9QPX3;Q9CXZ1	Q9CTT4;Q923F9;E9QPX3;Q9CXZ1	NADH dehydrogenase [ubiquinone] iron-sulfur protein 4, mitochondrial	Ndufs4	92679000	76652000	87901000	70183000	69081000	0	71392000	0	61668000
Q08024;Q3UYR3	Q08024;Q3UYR3	Core-binding factor subunit beta	Cbfb	85703000	77320000	88023000	102640000	72220000	0	93493000	85816000	90429000
Q505A8;P62892	Q505A8;P62892	60S ribosomal protein L39	Rpl39	0	0	0	0	74290000	0	94324000	0	0
Q499F3;Q3TM31;Q99MB1;Q8C2X8	Q499F3;Q3TM31;Q99MB1	Toll-like receptor 3	Tlr3	0	0	0	0	91558000	0	100440000	84141000	93274000
Q8BZ03;Q62101	Q8BZ03;Q62101	Serine/threonine-protein kinase D2;Serine/threonine-protein kinase D1	Prkd2;Prkd1	134090000	129700000	110840000	114100000	94953000	0	148580000	83984000	60723000
Q6P7V2;Q63ZX6;Q8CCJ9	Q6P7V2;Q63ZX6;Q8CCJ9	PHD finger protein 20-like protein 1	Phf20l1	37630000	0	0	0	113380000	0	0	0	0
Q8C4Q6	Q8C4Q6	Axin interactor, dorsalization-associated protein	Aida	118060000	117460000	0	98810000	126050000	0	0	0	0
Q5NCI4;O70250	Q5NCI4;O70250	Phosphoglycerate mutase 2	Pgam2	0	0	0	0	139510000	0	223770000	582090000	627760000
Q9D239;Q3U679;P01887	Q9D239;Q3U679;P01887	Beta-2-microglobulin	B2m	0	0	0	0	170810000	0	233640000	202750000	0
Q0VAW0;Q8C5W4	Q0VAW0;Q8C5W4	MORC family CW-type zinc finger protein 2B	Morc2b	0	151210000	0	0	195680000	0	0	0	0
Q9CTW8	Q9CTW8		A730035I17Rik	0	0	0	0	229990000	0	198180000	0	161550000
Q8N9U3;Q8C1A8;Q8C141;Q8C113;A2AQN5;A2AQN4;Q9QXG4;D6RHA7;Q8BY91	Q8N9U3;Q8C1A8;Q8C141;Q8C113;A2AQN5;A2AQN4;Q9QXG4	Acetyl-coenzyme A synthetase, cytoplasmic	Acss2	331150000	28256000	330940000	421210000	254070000	0	617320000	0	0
Q8BFZ3	Q8BFZ3	Beta-actin-like protein 2	Actbl2	0	0	163060000	83950000	261950000	0	0	0	110900000
E0CYI9;E9PWI6;B2RSU7;Q8CHG3;Q6P0A4;Q3UFV3	E0CYI9;E9PWI6;B2RSU7;Q8CHG3	GRIP and coiled-coil domain-containing protein 2	Gcc2	406630000	232900000	488300000	0	315030000	0	0	0	0
A6H6D1;D3Z5V0;Q8R4A3	A6H6D1;D3Z5V0;Q8R4A3	Dapper homolog 1	Dact1	0	0	527480000	630110000	633350000	0	0	556240000	588640000
F7AMS7;Q7TT13;Q5SXG1;Q5SXG3;G3X9G2;Q9JM52;Q571L1;J3QM71	F7AMS7;Q7TT13;Q5SXG1;Q5SXG3;G3X9G2;Q9JM52;Q571L1	Misshapen-like kinase 1	Mink1	473900000	0	619350000	0	994560000	0	691080000	0	569840000
E9Q8N1;E9Q8K5;A2ASS6;F7CR78	E9Q8N1;E9Q8K5;A2ASS6	Titin	Ttn	0	651870000	0	914850000	1850900000	0	0	0	0
Q4FJM2;P46414	Q4FJM2;P46414	Cyclin-dependent kinase inhibitor 1B	Cdkn1b	6616600	6165200	0	0	0	2708100	0	0	0
Q3UFS0	Q3UFS0	Protein zyg-11 homolog B	Zyg11b	0	0	2531700	0	0	2818100	3037400	0	0
Q9CQG4;Q921E4;Q5QGU0;G3X8R0;Q60870	Q9CQG4;Q921E4;Q5QGU0;G3X8R0;Q60870	Receptor expression-enhancing protein;Receptor expression-enhancing protein 5	Reep5	0	0	0	1937100	0	2902600	0	0	0
B2RRA5;Q9CWS1	B2RRA5;Q9CWS1	E3 ubiquitin-protein ligase RNF135	Rnf135	4195200	0	4489300	4200700	0	3106000	0	0	5062000
F7AWK3;D6RG52;Q6ZPE2	F7AWK3;D6RG52;Q6ZPE2	Myotubularin-related protein 5	Sbf1	0	0	3324200	0	0	3265900	4137900	0	0
D6RFT9;O88878	D6RFT9;O88878	AN1-type zinc finger protein 5	Zfand5	4991700	4096000	4683800	0	0	3288200	0	0	4709500
B2RQG2;A0A087WRR9;Q8BLA7;A0PJJ1;Q80U54	B2RQG2;A0A087WRR9;Q8BLA7;A0PJJ1;Q80U54		Phf3	3904200	0	0	3815700	0	3495900	3736400	0	0
Q9JJG9	Q9JJG9	Nitric oxide-associated protein 1	Noa1	4191100	7819400	4581300	0	4959600	3631400	0	0	0
Q3U4G9;A2CG76;Q8BP38;Q9Z148	Q3U4G9;A2CG76;Q8BP38;Q9Z148	Histone-lysine N-methyltransferase EHMT2	Ehmt2	6575200	4762200	6295000	6237800	0	3844000	7511500	0	11640000
Q80WS3	Q80WS3	rRNA/tRNA 2-O-methyltransferase fibrillarin-like protein 1	Fbll1	0	0	8041500	0	11045000	3885100	0	11629000	9552800
Q5F239;P62254	Q5F239;P62254	Ubiquitin-conjugating enzyme E2 G1;Ubiquitin-conjugating enzyme E2 G1, N-terminally processed	Ube2g1	0	5740800	6052100	0	7076400	3908100	0	5702200	0
D3Z7B5;Q8BWY9	D3Z7B5;Q8BWY9	Protein CIP2A	C330027C09Rik;Kiaa1524	0	0	0	5905800	0	3942700	4012600	0	0
Q6ZQ14;Q922E6	Q6ZQ14;Q922E6	FAST kinase domain-containing protein 2	mKIAA0971;Fastkd2	0	4285400	5471000	0	0	3988000	0	4837000	0
Q9D015;Q2TPA8	Q9D015;Q2TPA8	Hydroxysteroid dehydrogenase-like protein 2	Hsdl2	4628100	0	0	4347700	0	4127600	0	0	10117000
Q3UEX5;Q6PEV2;Q790S0;Q8K4W7;Q8K4W8;Q6PGA5;Q3TTK0;Q8K4W9;E9Q2I1;Q8K4X1;Q3TF45;P51791	Q3UEX5;Q6PEV2;Q790S0;Q8K4W7;Q8K4W8;Q6PGA5;Q3TTK0;Q8K4W9;E9Q2I1;Q8K4X1;Q3TF45;P51791	Chloride channel protein;H(+)/Cl(-) exchange transporter 3	Clcn3	0	0	0	0	5999100	4163500	0	0	0
Q6P9R5;Q69ZN6	Q6P9R5;Q69ZN6	N-acetylglucosamine-1-phosphotransferase subunits alpha/beta;N-acetylglucosamine-1-phosphotransferase subunit alpha;N-acetylglucosamine-1-phosphotransferase subunit beta	Gnptab	0	0	3826500	0	0	4254300	0	0	4860100
F6SFF5;Q8K1Z0	F6SFF5;Q8K1Z0	Ubiquinone biosynthesis protein COQ9, mitochondrial	Coq9	0	0	0	0	7639900	4291100	0	0	0
D3Z3F8;Q3TVW1;Q8R1X6	D3Z3F8;Q3TVW1;Q8R1X6	Spartin	Spg20	7769700	0	6394300	5409300	0	4342200	0	0	0
Q91WD1	Q91WD1	DNA-directed RNA polymerase III subunit RPC4	Polr3d	8661000	7844000	6225100	9108200	4859900	4347800	6803900	7192700	11601000
A0A087WPL5;O70133;Q3TF92;Q3TEB2	A0A087WPL5;O70133	ATP-dependent RNA helicase A	Dhx9	0	0	4901400	5349000	0	4399400	0	0	0
Q3TM85;Q80TD8;Q3U3W2;B2RVR2	Q3TM85;Q80TD8;Q3U3W2;B2RVR2		Tmem181b-ps;mKIAA1423;Tmem181a	2936900	0	6710800	7785300	8782200	4446500	0	8589100	8946000
Q8BSE7	Q8BSE7		Clasp2	4839000	5477800	6491300	0	4203500	4523000	0	7259400	0
O35450	O35450	FK506-binding protein-like	Fkbpl	5956900	4804100	4616600	0	2344400	4531500	0	0	0
A0A0A6YY02;Q9CW96;Q9D8U0;Q7TSB3	A0A0A6YY02;Q9CW96;Q9D8U0;Q7TSB3		Ifrd2	6050600	4691600	5361100	6801700	5932500	4566200	7229000	0	0
Q5SNZ0	Q5SNZ0	Girdin	Ccdc88a	5265300	4911100	5600600	7116900	4034300	4710000	0	0	0
Q8C9B9	Q8C9B9	Death-inducer obliterator 1	Dido1	7432200	0	6631700	8493000	0	4746300	0	0	0
Q3TXH9;E9Q6L4;F6QUA9;Q3U3T9;Q60949;Q3TNW7	Q3TXH9;E9Q6L4;F6QUA9;Q3U3T9;Q60949;Q3TNW7	TBC1 domain family member 1	Tbc1d1	3843400	0	0	0	6036100	4800200	4149700	0	0
Q9DCB8	Q9DCB8	Iron-sulfur cluster assembly 2 homolog, mitochondrial	Isca2	9867600	0	0	0	0	4827300	0	0	0
D3YU58;Q9WVM3	D3YU58;Q9WVM3	Anaphase-promoting complex subunit 7	Anapc7	0	0	4442800	5689400	0	4874200	0	0	5321200
P52760	P52760	Ribonuclease UK114	Hrsp12	12382000	9476500	7919700	7679100	0	4942900	0	0	0
Q8BGR6;B7ZN40	Q8BGR6;B7ZN40	ADP-ribosylation factor-like protein 15	Arl15	0	7185200	5123500	0	0	4972400	6257700	0	0
Q8CHG0;Q924Z6;F7B8F0;F6XQN1	Q8CHG0;Q924Z6;F7B8F0;F6XQN1	Exportin-6	Xpo6	0	0	0	7858500	8054100	4976200	7244200	7917700	0
Q9DBF7	Q9DBF7	Pre-mRNA-splicing factor CWC25 homolog	Cwc25	0	0	0	0	0	5007400	5254400	7393000	6854900
P58501;F6YY19	P58501;F6YY19	PAX3- and PAX7-binding protein 1	Paxbp1	0	4625500	5620800	4203200	0	5023000	4823000	0	0
Q3TPC7;Q3TGP3;O35386	Q3TPC7;Q3TGP3;O35386	Phytanoyl-CoA dioxygenase, peroxisomal	Phyh	7953700	9069800	8813700	8017300	6612700	5029100	8117100	9658500	8711200
E0CY18;Q91X58;A0A087WPF5	E0CY18;Q91X58;A0A087WPF5	AN1-type zinc finger protein 2B	Zfand2b	6998900	0	7420500	8264300	0	5047600	5447600	0	6233800
Q91WR3;Q3UG63	Q91WR3;Q3UG63	Activating signal cointegrator 1 complex subunit 2	Ascc2	0	0	0	0	7882700	5125000	7441000	7937500	9149100
Q3U2C5	Q3U2C5	E3 ubiquitin-protein ligase RNF149	Rnf149	0	0	0	0	5807000	5169300	6892100	0	4607700
Q3UYK2;P49769;Q5EM20;Q3TDW2;Q3U4P5;Q61144	Q3UYK2;P49769	Presenilin;Presenilin-1;Presenilin-1 NTF subunit;Presenilin-1 CTF subunit;Presenilin-1 CTF12	Psen1	8837800	6082600	0	7102300	8171900	5235700	0	0	0
Q148R8;Q80UK8;Q5SXZ7;A0A0A0MQG3;X1WI16	Q148R8;Q80UK8;Q5SXZ7;A0A0A0MQG3;X1WI16	Integrator complex subunit 2	Ints2	6596000	0	6825400	6120400	3690600	5239600	0	0	0
J3QNK5;Q8BIH0	J3QNK5;Q8BIH0	Histone deacetylase complex subunit SAP130	Sap130	4801600	5647500	8337200	7671600	8486100	5430900	5812000	8063400	7800700
Q80Y55;B2KGE3	Q80Y55;B2KGE3	BSD domain-containing protein 1	Bsdc1	6829000	0	3769200	4744300	3695700	5433500	0	0	0
A3KGU5;E9Q447;B9EKJ1;B2RXX6;A3KGU7;Q3TYI8;Q3URW8;Q3V1V5;Q58ES7;Q6PA04;A3KGU9;Q3TNY2;A3KGU4;P08032	A3KGU5;E9Q447;B9EKJ1;B2RXX6;A3KGU7		Sptan1	3243700	0	0	0	5152200	5436400	0	0	4208200
Q5Y5T1	Q5Y5T1	Probable palmitoyltransferase ZDHHC20	Zdhhc20	6982900	5355600	7780000	7681500	5875500	5457700	7797300	0	0
P70158	P70158	Acid sphingomyelinase-like phosphodiesterase 3a	Smpdl3a	7169200	5913100	6571300	0	8145300	5471300	5572800	4021300	0
Q3TVY3;Q8BR63	Q3TVY3;Q8BR63	Protein FAM177A1	Fam177a1	0	0	0	5244400	0	5514800	6434900	6485400	0
Q14B01;Q8R3P8;Q3UJW4;Q9D7A3	Q14B01;Q8R3P8;Q3UJW4;Q9D7A3		Rnf113a2;Rnf113a1	8334900	7192200	0	7340800	0	5609700	0	10522000	9763900
Q8C089;Q3TSR0;K0J1C6;Q8C197;Q3TXF7;Q9ES89	Q8C089;Q3TSR0;K0J1C6;Q8C197;Q3TXF7;Q9ES89	Exostosin-like 2	Extl2	0	4565600	0	0	8951900	5639000	0	4330200	0
A4FUW1;A2ACM0;Q8K4Q0;F6U5L3;F7BQS0;E9PXZ5	A4FUW1;A2ACM0;Q8K4Q0	Regulatory-associated protein of mTOR	Rptor	8436700	0	8722500	0	8492600	5667500	7438600	10809000	0
Q2TBA3	Q2TBA3	Mucosa-associated lymphoid tissue lymphoma translocation protein 1 homolog	Malt1	7172700	7755700	0	0	0	5680300	0	0	0
Q9QXE6;Q569V6;Q99J39	Q9QXE6;Q569V6;Q99J39	Malonyl-CoA decarboxylase, mitochondrial	Mlycd	5651100	0	4713200	0	0	5715300	0	3299600	0
Q9ME04;Q7JCY6;P03911;Q3UQ59;Q3UPP3;W0TGY1;F1JVR2;A9UIX0	Q9ME04;Q7JCY6;P03911;Q3UQ59;Q3UPP3;W0TGY1;F1JVR2;A9UIX0	NADH-ubiquinone oxidoreductase chain 4	ND4;mt-Nd4;Mtnd4	0	0	18704000	0	0	5809000	6860800	0	0
Q9WVL1	Q9WVL1	AP-4 complex subunit sigma-1	Ap4s1	7543100	6743900	7593800	7262000	0	5922600	6476900	8264100	5274000
Q71RI9;D6RJ70	Q71RI9;D6RJ70	Kynurenine--oxoglutarate transaminase 3	Ccbl2	0	0	7726000	0	6467100	5928300	0	0	0
Q3TLR3;Q8CH72	Q3TLR3;Q8CH72	E3 ubiquitin-protein ligase TRIM32	Trim32	0	0	6076200	7882100	5226600	5952400	8525600	0	0
Q3UVI0;Q3UQ68;Q3TRR5;Q9MD82;Q7GIP3;Q4JFM6;N0DTI5;P03921	Q3UVI0;Q3UQ68;Q3TRR5;Q9MD82;Q7GIP3;Q4JFM6;N0DTI5;P03921	NADH-ubiquinone oxidoreductase chain 5	mt-Nd5;ND5;Mtnd5	0	0	13780000	0	0	5981200	15669000	0	0
Q3U1W7;G5E8J0;O35516	Q3U1W7;G5E8J0;O35516	Neurogenic locus notch homolog protein 2;Notch 2 extracellular truncation;Notch 2 intracellular domain	Notch2	6834000	8861100	0	7517900	0	5983100	0	9255800	0
Q9CVV6;Q8CDU1;Q9DC63	Q9CVV6;Q8CDU1;Q9DC63	F-box only protein 3	Fbxo3	5275300	7687200	8321000	6977900	6687500	6004600	0	5589300	7183000
Q05CR0;Q811J2	Q05CR0;Q811J2		LOC72520	0	0	0	15335000	0	6060300	0	11878000	0
Q3TAJ0;Q8BX80;F7CXI4	Q3TAJ0;Q8BX80;F7CXI4	Cytosolic endo-beta-N-acetylglucosaminidase	Engase	4111000	6457800	0	0	5242000	6074300	0	0	0
D3YXZ0;Q8VEG6	D3YXZ0;Q8VEG6	CCR4-NOT transcription complex subunit 6-like	Cnot6l	0	0	5202000	0	0	6099800	0	0	0
A2BDX3	A2BDX3	Adenylyltransferase and sulfurtransferase MOCS3;Molybdopterin-synthase adenylyltransferase;Molybdopterin-synthase sulfurtransferase	Mocs3	6115500	0	0	6234700	8106500	6105000	8888900	0	0
Q6NXI6;Q9D4Z4	Q6NXI6	Regulation of nuclear pre-mRNA domain-containing protein 2	Rprd2	5452600	5652800	8159000	6474100	6043100	6118200	6548400	7179600	7334700
B2RUR8	B2RUR8	OTU domain-containing protein 7B	Otud7b	6270000	8670000	6745500	9333000	0	6224200	9754100	0	0
Q9D168	Q9D168	Integrator complex subunit 12	Ints12	0	0	0	0	0	6237100	0	0	8567500
D3Z6S3;D3YZR1;D3YYU6;Q9JHE7	D3Z6S3;D3YZR1;D3YYU6;Q9JHE7	Protein TSSC4	Tssc4	9561500	0	6395800	0	7443800	6260400	6640800	0	7083300
B7ZWG0;B2RXP7;E9QMB7;Q8CES0	B7ZWG0;B2RXP7;E9QMB7;Q8CES0	N-alpha-acetyltransferase 30	Naa30	0	0	0	7882400	0	6281800	0	0	9137000
Q8BQY0;Q8C8I5;Q8BFU3	Q8BQY0;Q8C8I5;Q8BFU3	RING finger protein 214	Rnf214	6753100	0	3984100	6082200	6682200	6301900	7327100	8206400	8871800
Q6DVA0	Q6DVA0	LEM domain-containing protein 2	Lemd2	7192800	10795000	6220300	0	6970200	6305700	0	5638000	0
Q6AXE3;Q80XT2;Q8R420;Q9JL37;Q3TN91	Q6AXE3;Q80XT2;Q8R420	ATP-binding cassette sub-family A member 3	Abca3	8334600	8053500	8889300	8881900	0	6334400	6582600	11366000	9468800
Q8VE38;E9Q2B7;E9PZL5;E9Q690;E9Q8U8	Q8VE38	Oxidoreductase NAD-binding domain-containing protein 1	Oxnad1	0	6637100	0	0	6698400	6375500	0	8170600	7011000
E0ZPU5;Q3U2M7;Q3U126;P06537;E9Q310;Q05DD1;Q06VW2;E9PUR6;E9PYV1;E9Q8A6	E0ZPU5;Q3U2M7;Q3U126;P06537;E9Q310;Q05DD1;Q06VW2;E9PUR6;E9PYV1	Glucocorticoid receptor	Nr3c1	8509400	6436000	6819000	7163600	0	6391700	0	10371000	0
E9Q9E0;Q8VCX5	E9Q9E0;Q8VCX5	Calcium uptake protein 1, mitochondrial	Micu1	0	6776400	0	0	0	6409100	0	7644100	7223500
B2RWX4;Q8BZ36	B2RWX4;Q8BZ36	RAD50-interacting protein 1	Rint1	0	0	4929900	0	0	6464500	0	0	0
Q3UPT4;Q3UJX3;P70218	Q3UPT4;Q3UJX3;P70218	Mitogen-activated protein kinase kinase kinase kinase;Mitogen-activated protein kinase kinase kinase kinase 1	Map4k1	5480800	6306200	4831900	6240000	4569300	6518300	6663000	9806300	7815300
Q3UYQ9;Q0VB85;O88396	Q3UYQ9;Q0VB85;O88396	GrpE protein homolog;GrpE protein homolog 2, mitochondrial	Grpel2	0	0	0	0	0	6533600	0	0	6141600
E3WH30;Q8BP27	E3WH30;Q8BP27	Swi5-dependent recombination DNA repair protein 1 homolog	Sfr1	15247000	0	10563000	17540000	0	6535800	0	11684000	17059000
V9GXI9;Q3U3S0;P58404	V9GXI9;Q3U3S0;P58404	Striatin-4	Strn4	0	0	7642700	0	0	6565900	0	0	8598500
Q5PRF0	Q5PRF0	HEAT repeat-containing protein 5A	Heatr5a	5576700	0	8721700	0	7325800	6566100	0	0	0
Q3U7U3;D6RJ76;F8WIP1;Q3UGI9;Q3UD93	Q3U7U3;D6RJ76;F8WIP1;Q3UGI9;Q3UD93	F-box only protein 7	Fbxo7	8538800	8890400	9768800	8959900	7607300	6569900	6167500	9228100	0
Q6P1G0	Q6P1G0	HEAT repeat-containing protein 6	Heatr6	0	0	8620200	0	0	6585800	0	10553000	9953800
Q8CE50	Q8CE50	Sorting nexin-30	Snx30	0	10594000	0	6797700	12313000	6587500	10218000	12612000	0
A2ADA5	A2ADA5	tRNA pseudouridine synthase-like 1	Pusl1	7914200	5882900	6790900	6316000	7839700	6643600	8023600	5338500	6926300
Q3U3M9;Q3V2N1;Q9JKF4	Q3U3M9;Q3V2N1;Q9JKF4	C-type lectin domain family 6 member A	Clec4n;Clec6a	0	0	0	0	5730600	6644700	0	0	0
Q3TET1;Q3UI47;B1AQZ2;P28741;F6V6Z9;Q80UK1;Q3TSP1;Q3TTS7;Q8CGJ1	Q3TET1;Q3UI47;B1AQZ2;P28741;F6V6Z9;Q80UK1;Q3TSP1;Q3TTS7;Q8CGJ1	Kinesin-like protein;Kinesin-like protein KIF3A	Kif3a	0	9505100	0	10043000	0	6655400	0	0	0
B1AXI9;J3QMP9;Q62036	B1AXI9;J3QMP9;Q62036	Centrosomal protein of 131 kDa	Cep131	8136900	0	7257300	9708600	5961700	6657500	8833300	8206300	7718700
Q9CQ88	Q9CQ88	Tetraspanin-31	Tspan31	5468000	8862600	9601700	7823400	0	6700900	5344600	0	7518400
Q3TBD4;D3Z390;Q921C5	Q3TBD4;D3Z390;Q921C5	Protein bicaudal D homolog 2	Bicd2	0	7935200	0	7971100	10240000	6728200	0	0	0
P70302	P70302	Stromal interaction molecule 1	Stim1	0	0	0	7089800	0	6743700	0	0	0
Q8BLH7;D3YWU7	Q8BLH7;D3YWU7	HIRA-interacting protein 3	Hirip3	0	7911300	11702000	0	0	6811800	9935400	0	0
B2RQQ7;Q7TT50	B2RQQ7;Q7TT50	Non-specific serine/threonine protein kinase;Serine/threonine-protein kinase MRCK beta	Cdc42bpb	7615600	6652400	6837100	4483900	7567200	6817200	6983800	0	0
G3UXH4;G3UZM9;Q8BWW9	G3UXH4;G3UZM9;Q8BWW9	Serine/threonine-protein kinase N2	Pkn2	0	5793700	0	6878000	0	6828300	7676900	5804700	0
Q9DB91	Q9DB91	Mediator of RNA polymerase II transcription subunit 29	Med29	9030200	0	0	9697100	0	6854200	9233800	0	0
A8Y5H7;Q99J07;Q9DBQ0;A2A9B9;Q6A071;Q8BXE6	A8Y5H7;Q99J07;Q9DBQ0;A2A9B9;Q6A071		Sec14l1	6733400	7815700	0	11066000	7400200	6894900	10241000	0	0
A0A087WP87;A0A087WRE9;Q9CQJ4	A0A087WP87;A0A087WRE9;Q9CQJ4	E3 ubiquitin-protein ligase RING2	Rnf2	7317800	7624300	0	8785500	0	6910800	6078000	9434600	9275200
Q8BGW1;E9Q1E4;D3Z127	Q8BGW1;E9Q1E4	Alpha-ketoglutarate-dependent dioxygenase FTO	Fto	14034000	9817900	15844000	19699000	9892200	6926000	0	14295000	12518000
Q3ULB0;Q5DTS4;O88720;S4R1W5;Q8R388	Q3ULB0;Q5DTS4;O88720;S4R1W5;Q8R388		Rbm6	8072600	7260800	0	8290300	0	6984700	0	0	8229800
F7B209;Q3U0V3;Q80UP5;A0JLM7;Q3TS15;Q6PD24	F7B209;Q3U0V3;Q80UP5;A0JLM7;Q3TS15;Q6PD24	Ankyrin repeat domain-containing protein 13A;Ankyrin repeat domain-containing protein 13D	Ankrd13a;Ankrd13d	7461700	6896800	12084000	5910100	5839600	7014900	0	11503000	0
Q9D250;Q3USX5;Q8R4K2	Q9D250;Q3USX5;Q8R4K2	Interleukin-1 receptor-associated kinase 4	Irak4	9193400	7883500	0	0	0	7028200	0	0	0
Q6P8M1	Q6P8M1	Putative deoxyribonuclease TATDN1	Tatdn1	10505000	11722000	7254100	8821600	11195000	7054300	0	0	0
D3Z0Y1;Q9D4W6;P57725	D3Z0Y1;Q9D4W6;P57725	SAM domain-containing protein SAMSN-1	Samsn1	0	0	0	0	9924100	7088200	0	0	0
Q3UN47;O08600	Q3UN47;O08600	Endonuclease G, mitochondrial	Endog	6033600	0	12994000	6635500	8165000	7119700	8111500	12308000	7654900
E9PUA3;A0A087WQ39;Q8R0S2;D3Z6V7;D3Z5I6;A4GZ26;E9QAD8;Q5DU25	E9PUA3;A0A087WQ39;Q8R0S2	IQ motif and SEC7 domain-containing protein 1	Iqsec1	11906000	9076200	9780300	14540000	8362200	7132200	9876700	9617900	10160000
O08797	O08797		Serpinb9	0	8962300	0	0	8266300	7151000	0	10354000	11953000
Q8BH57	Q8BH57	WD repeat-containing protein 48	Wdr48	7922900	8584800	0	0	0	7152300	5277400	0	0
Q8CA82;Q3TD57;O88839	Q8CA82;Q3TD57;O88839	Disintegrin and metalloproteinase domain-containing protein 15	Adam15	0	0	4875800	6038100	7106200	7152800	4117200	0	0
Q7TSH2;F7DF70;Q80WB7;Q3U6H6	Q7TSH2;F7DF70;Q80WB7	Phosphorylase b kinase regulatory subunit beta	Phkb	8497500	9226200	8558900	0	8202300	7203500	0	0	0
A0A0A6YWB0;A0A0A6YVV8;A0A0A6YXP3;D0EX61;Q8C181;A0A0A6YWG1;A0A0A6YXQ4;S4R267;Q542D8;Q8R003	A0A0A6YWB0;A0A0A6YVV8;A0A0A6YXP3;D0EX61;Q8C181	Muscleblind-like protein 2	Mbnl1;Mbnl2	0	5732200	0	8673800	6135200	7205100	0	4204400	0
F8VQE2;E9Q0A4;Q9QXL1;F6ZSF2;Q8BIT4	F8VQE2;E9Q0A4;Q9QXL1;F6ZSF2;Q8BIT4	Kinesin-like protein;Kinesin-like protein KIF21B	Kif21b	6443100	0	0	5790500	6706200	7267900	0	0	0
Q8BPA8	Q8BPA8	Protein DPCD	Dpcd	9512100	8920100	8406100	8709700	0	7327200	8365800	0	0
V9GX56;V9GXP9;Q3U4S0;Q7M753;F6VV40;Q3TIG7;Q7M752;Q5SXA7;Q3UWJ1;Q8R2W9	V9GX56;V9GXP9;Q3U4S0;Q7M753;F6VV40;Q3TIG7;Q7M752;Q5SXA7;Q3UWJ1;Q8R2W9	Pantothenate kinase 3	Pank2;Pank3	9883400	8688600	12101000	9738000	8369100	7345700	7402800	10836000	9380000
Z4YM25;Q8BHJ9	Z4YM25;Q8BHJ9	Pre-mRNA-splicing factor SLU7	Slu7	0	5591800	0	0	0	7345800	0	0	0
Q66I45;B1ATD5;B1ATD4;R4GML8;Q8K296;Q9CVQ1;Q8R0N4;M0QW74	Q66I45;B1ATD5;B1ATD4;R4GML8;Q8K296;Q9CVQ1;Q8R0N4;M0QW74	Myotubularin-related protein 3	Mtmr3	0	7774800	0	0	0	7399900	6680100	7986500	7957000
Q03141;Q9JKE5;Q5DTG3;Q14DQ3;C9K101;Q8VHJ5;A0A0A6YY78;Q9CW99;Q8CIP4	Q03141;Q9JKE5;Q5DTG3	MAP/microtubule affinity-regulating kinase 3	Mark3	9866700	8800200	12751000	9276600	6199800	7430400	7994500	0	0
Q8R1N0;F8QZ85	Q8R1N0;F8QZ85	Zinc finger protein 830	Znf830;Zfp830	11718000	0	0	0	0	7454500	0	0	0
Q9D6S7	Q9D6S7	Ribosome-recycling factor, mitochondrial	Mrrf	7108400	7328000	8117100	10423000	6972900	7468600	0	7904500	0
Q8BKZ6;Q80VY1;Q8BGF3	Q8BKZ6;Q80VY1;Q8BGF3	WD repeat-containing protein 92	Wdr92	10332000	10651000	7908900	9152700	7247000	7515400	7650800	6509300	6878900
Q542S9;Q3V2N5;Q61235	Q542S9;Q3V2N5;Q61235	Beta-2-syntrophin	Sntb2	6320500	5393100	0	0	0	7526300	6311800	8482700	6760600
Q8C6B5;Q00899;Q3TLF0;E9QK22;P22227;Q3TTC2	Q8C6B5;Q00899;Q3TLF0;E9QK22;P22227;Q3TTC2	Transcriptional repressor protein YY1;Zinc finger protein 42;Transcription factor YY2	Yy1;Zfp42;Yy2	0	9216600	0	0	8970300	7542500	11448000	7206400	0
O08856	O08856	RNA polymerase II elongation factor ELL	Ell	4880200	5174800	5220400	0	6773300	7551800	4172500	6761500	0
Q8CEJ2;Q9WTZ0	Q8CEJ2;Q9WTZ0	Protein UXT	Uxt	0	0	0	8789100	8051700	7632000	0	0	0
Q811J3;Q8BZL2	Q811J3	Iron-responsive element-binding protein 2	Ireb2	0	0	0	11275000	0	7636100	0	0	14023000
Q3TWW5;Q61048	Q3TWW5;Q61048	WW domain-binding protein 4	Wbp4	5729900	0	5655300	0	0	7643000	0	7338500	0
A2AGL5;Q496S6;Q496R6;Q9D9K3	A2AGL5;Q496S6;Q496R6;Q9D9K3	Cell death regulator Aven	Aven	9159300	0	0	7365100	0	7723000	10121000	0	0
Q9CZN8	Q9CZN8	Glutamyl-tRNA(Gln) amidotransferase subunit A, mitochondrial	Qrsl1	11826000	11478000	13491000	8702200	9143800	7775100	7944800	11214000	12761000
Q5XG68;E9PW15;Q80U70;Q3URR6;Q3UX45	Q5XG68;E9PW15;Q80U70	Polycomb protein Suz12	Suz12	8542800	0	8721200	0	0	7808800	0	12973000	9566300
Q922X9;Q921F5;F6RXJ8	Q922X9;Q921F5;F6RXJ8	Protein arginine N-methyltransferase 7	Prmt7	0	3541700	7572200	7219900	0	7826900	7415800	7906200	5054100
A0A087WSB5;A0A087WRE5;Q6P3D0	A0A087WSB5;A0A087WRE5;Q6P3D0	U8 snoRNA-decapping enzyme	Nudt16	14496000	16389000	15376000	11547000	10946000	7832400	0	0	0
Q6NVG1	Q6NVG1	Lysophospholipid acyltransferase LPCAT4	Lpcat4	0	0	0	8076800	0	7915600	0	0	0
Q3TKX4;Q8K301	Q3TKX4;Q8K301	Probable ATP-dependent RNA helicase DDX52	Ddx52	0	0	0	6540800	5281500	7918900	0	0	0
Q3U4C8;A2AKI5;P43406	Q3U4C8;A2AKI5;P43406	Integrin alpha-V;Integrin alpha-V heavy chain;Integrin alpha-V light chain	Itgav	0	0	0	9846900	0	7920200	0	0	0
Q9JLN9	Q9JLN9	Serine/threonine-protein kinase mTOR	Mtor	8438700	7357200	0	7047500	0	7957400	0	0	0
S4R1M5;B7ZNU2;S4R265;S4R2L4;A2RTL5	S4R1M5;B7ZNU2;S4R265;S4R2L4;A2RTL5	Arginine/serine-rich coiled-coil protein 2	Rsrc2	10319000	0	6501000	8587700	9161400	7976300	0	10272000	10500000
Q05BI9;F6ZBV6;Q8BSY1;D3Z5R0;Q8BNZ9;Q8C6L5	Q05BI9;F6ZBV6;Q8BSY1;D3Z5R0;Q8BNZ9;Q8C6L5	Cyclic GMP-AMP synthase	Mb21d1	0	0	8597300	6252300	6883100	8009200	7705100	10719000	8905200
F6XCT0;Q3UPG9	F6XCT0;Q3UPG9		Macf1	9835200	10546000	11233000	0	7800800	8012900	9375100	0	0
B7ZC21;B7ZC22;Q3TP50;O70139	B7ZC21;B7ZC22;Q3TP50;O70139	cAMP-dependent protein kinase inhibitor gamma	Pkig	11787000	10384000	12578000	12046000	10611000	8077600	13927000	11350000	12596000
Q8BUI3;H9KV12	Q8BUI3;H9KV12	Leucine-rich repeat and WD repeat-containing protein 1	LRWD1;Lrwd1	0	8133300	0	6951300	0	8104500	0	0	5428900
Q8R5A0	Q8R5A0	N-lysine methyltransferase SMYD2	Smyd2	8580300	7906800	10049000	10410000	8373800	8122800	9269000	8701000	7234400
Q6PGH6;Q80XK8;Q6GQV6;E9Q411	Q6PGH6;Q80XK8;Q6GQV6;E9Q411		Nbas	5575900	4711700	6513700	7872900	8556300	8128900	0	0	0
Q5HZY7;Q9CR51	Q5HZY7;Q9CR51	V-type proton ATPase subunit G 1	Atp6v1g1	6472500	4726100	8374100	0	0	8152600	7064800	0	0
A0A0A0MQB0;Q4PJX1	A0A0A0MQB0;Q4PJX1	Protein odr-4 homolog	BC003331;Odr4	7279300	12077000	8484500	9907700	7864400	8196500	8036000	14610000	9742500
E9Q804;E9QKG6;Q99NH0	E9Q804;E9QKG6;Q99NH0	Ankyrin repeat domain-containing protein 17	Ankrd17	10457000	8622600	7332100	12458000	5121900	8197500	7411700	8818500	8178800
Q9DCV4	Q9DCV4	Regulator of microtubule dynamics protein 1	Rmdn1	5750100	0	6815500	8595500	6594100	8218500	8495800	5490200	0
Q3UDG9;Q3U7M4;Q3U6W5;Q0PM16;Q0PM15;P22366;Q3TIB3;F6SPW1;Q8C1X0	Q3UDG9;Q3U7M4;Q3U6W5;Q0PM16;Q0PM15;P22366;Q3TIB3	Myeloid differentiation primary response protein MyD88	Myd88	0	7209600	6927600	0	0	8231700	6938100	13098000	8845900
Q8CED3;Q8CDH2;E9Q392;Q9QXK2;F6ZKR0;W4VSP9;Q921R6;D3Z734;D3Z733	Q8CED3;Q8CDH2;E9Q392;Q9QXK2;F6ZKR0;W4VSP9;Q921R6;D3Z734;D3Z733	E3 ubiquitin-protein ligase RAD18	Rad18	7850100	9051700	0	0	0	8262400	0	10467000	0
Q9D4A1;Q69ZC8	Q9D4A1;Q69ZC8	GPALPP motifs-containing protein 1	Gpalpp1	10789000	9703200	0	0	0	8277800	0	9651600	8844700
F8WHU7;Q9D3E6;F6XQW1	F8WHU7;Q9D3E6;F6XQW1	Cohesin subunit SA-1	Stag1	10449000	9932100	11872000	11888000	0	8293700	0	7876300	10147000
Q9D1R2	Q9D1R2	Protein KTI12 homolog	Kti12	9111700	7516700	7488200	9194700	7944800	8301300	0	8146600	0
Q91WL8	Q91WL8	WW domain-containing oxidoreductase	Wwox	9412100	8115600	5453700	7912200	5928900	8351400	5989200	5653900	7787300
Q8K2Y7	Q8K2Y7	39S ribosomal protein L47, mitochondrial	Mrpl47	9891900	12655000	10396000	11103000	15457000	8364000	11098000	10914000	13605000
F6XXE6;F8VPN4;Q8CE68	F6XXE6;F8VPN4		Agl	0	0	11239000	6131900	0	8392300	0	7228900	0
A0A087WP98;A0A087WPN6;Q3U6E4;Q0VGU2;A0A087WQN2;J3QPK6;Q8C2T3;Q3U8X6;Q3UA54;P26350	A0A087WP98;A0A087WPN6;Q3U6E4;Q0VGU2;A0A087WQN2;J3QPK6;Q8C2T3;Q3U8X6;Q3UA54;P26350	Prothymosin alpha;Prothymosin alpha, N-terminally processed;Thymosin alpha	Ptma;Gm6625	11540000	12007000	14429000	15346000	13210000	8420600	6543900	11271000	16160000
D3Z786;Q3UX28;Q3TCV4;P63030	D3Z786;Q3UX28;Q3TCV4;P63030	Mitochondrial pyruvate carrier 1	Mpc1	10601000	0	7649200	0	0	8422300	0	0	0
Q8BIW9;E9PVJ3;E9Q2M3	Q8BIW9;E9PVJ3;E9Q2M3	Chromosome transmission fidelity protein 18 homolog	Chtf18	0	0	9047900	0	0	8440000	10417000	10080000	0
G8JL51;Q3V1B9;Q8K202	G8JL51;Q3V1B9;Q8K202	DNA-directed RNA polymerase I subunit RPA49	Polr1e	8773700	8992300	8686600	8876400	11571000	8456500	0	10493000	8417000
Q05CA9;Q9EQC8	Q05CA9;Q9EQC8		Prcc	9635800	7543300	9678200	6495300	9339400	8476400	0	0	0
Q3UD01	Q3UD01	Putative ataxin-7-like protein 3B	Atxn7l3b	5436400	13510000	0	11806000	0	8483500	0	0	0
Q9WVM1	Q9WVM1	Rac GTPase-activating protein 1	Racgap1	0	0	0	10128000	0	8485400	10553000	13129000	12502000
A2A9I0;O35166	A2A9I0;O35166	Golgi SNAP receptor complex member 2	Gosr2	8716500	13642000	12608000	10617000	0	8491600	0	11713000	0
Q9CXV9	Q9CXV9	DCN1-like protein 5	Dcun1d5	6106700	15981000	12559000	11929000	11759000	8524900	0	13565000	14612000
E9QPM1;Q8VE91	E9QPM1;Q8VE91	Protein FAM134B	Fam134b	0	0	0	8034000	10302000	8525600	8627500	12659000	0
F6YTL8;D3YWX2	F6YTL8;D3YWX2		Ylpm1	10492000	7832900	8901300	8268700	9468900	8544600	9733300	9276600	10882000
Q3TVB5;Q8R0F5	Q3TVB5;Q8R0F5	RNA-binding motif protein, X-linked 2	Rbmx2	7151800	9590500	6789700	8088100	0	8572700	6788600	8522000	7552000
Q91VX9	Q91VX9	Transmembrane protein 168	Tmem168	0	11493000	9136700	9986100	0	8620000	0	7793700	9381500
A0A087WSS1;G3X9J4;E9QM90;Q148V7	A0A087WSS1;G3X9J4;E9QM90;Q148V7	LisH domain and HEAT repeat-containing protein KIAA1468	2310035C23Rik;Kiaa1468	8430200	10298000	0	9863700	8477300	8634600	0	0	0
B2RWS6;Q8QZV8;F8VPR5;P45481	B2RWS6;Q8QZV8;F8VPR5;P45481	Histone acetyltransferase p300;CREB-binding protein	Ep300;Crebbp	0	9835500	10812000	9960100	8289300	8715200	6469100	7946000	0
Q8BXA5	Q8BXA5	Cleft lip and palate transmembrane protein 1-like protein	Clptm1l	0	9789900	0	9640200	0	8723600	11634000	0	0
Q9Z0I6	Q9Z0I6		Slfn2	0	0	0	0	10574000	8760600	11714000	8096100	11866000
Q9CQ06	Q9CQ06	39S ribosomal protein L24, mitochondrial	Mrpl24	9968400	15537000	7042300	0	0	8775100	0	14760000	11689000
Q3U8A5;Q3TPX4;Q3UD13;E9PZ92	Q3U8A5;Q3TPX4;Q3UD13;E9PZ92	Exocyst complex component 5	Exoc5	0	9947900	7630200	0	0	8777200	0	0	0
Q9Z2D6	Q9Z2D6	Methyl-CpG-binding protein 2	Mecp2	7603500	11916000	9385800	6960700	7480700	8782200	8042100	7818900	9568600
D3Z6X3;D3Z6X4;E9QA46;Q8C6F0;Q3UIG2;Q9QXY9	D3Z6X3;D3Z6X4;E9QA46;Q8C6F0;Q3UIG2;Q9QXY9	Peroxisomal biogenesis factor 3	Pex3	0	0	8270600	7908800	0	8801200	5313900	14010000	9781300
Q8R570;B2FDF6;I7HFU4	Q8R570;B2FDF6	Synaptosomal-associated protein 47	Snap47	0	12261000	0	0	0	8801800	0	0	0
Q9D211	Q9D211	CDKN2AIP N-terminal-like protein	Cdkn2aipnl	10098000	8530500	7547600	11286000	6021000	8822900	7864900	7142100	11114000
Q9JJC6;Q99LE1	Q9JJC6	RILP-like protein 1	Rilpl1	21280000	16404000	16667000	0	24791000	8884200	0	0	0
E9PYL4;Q6RUT9;O70496;Q8CCI9	E9PYL4;Q6RUT9;O70496;Q8CCI9	Chloride channel protein;H(+)/Cl(-) exchange transporter 7	Clcn7	10528000	9004100	0	0	0	8915400	9344700	11818000	10053000
Q9D8S3	Q9D8S3	ADP-ribosylation factor GTPase-activating protein 3	Arfgap3	8605000	0	10379000	0	0	8927800	0	8316400	0
Q5U5I3;Q99N85;D3Z603	Q5U5I3;Q99N85;D3Z603	28S ribosomal protein S18a, mitochondrial	Mrps18a	12394000	10918000	13411000	12219000	0	8985500	9314400	9808100	10234000
Q3TR20;Q3UM29	Q3TR20;Q3UM29	Conserved oligomeric Golgi complex subunit 7	Cog7	0	13570000	11180000	10861000	0	9004700	9059900	0	0
E9Q8A3;Q8BKC8	E9Q8A3;Q8BKC8	Phosphatidylinositol 4-kinase beta	Pi4kb	9061100	12151000	7240100	8899300	6022100	9027200	9286400	0	7023000
B7ZWM8;B2RXP1;Q8BVU0;E9Q892;E9QAU9	B7ZWM8;B2RXP1;Q8BVU0;E9Q892;E9QAU9	Leucine-rich repeat and calponin homology domain-containing protein 3	Lrch3	0	0	0	0	7964300	9029200	8786600	7856600	9793600
Q3TBQ3;E9PYM7;E9PZ88;F8WIE1;Q8BWY6;Q3ZCX9;Q91W89;E0CZB0;E0CXM6;E0CXI0;E0CYW2;Q3TAW2	Q3TBQ3;E9PYM7;E9PZ88;F8WIE1;Q8BWY6;Q3ZCX9;Q91W89	Alpha-mannosidase;Alpha-mannosidase 2C1	Man2c1	19504000	14333000	10103000	12860000	0	9043500	0	8884200	0
E9Q2H1;Q80TP3;Q3TSI5;Q8BJK5	E9Q2H1;Q80TP3;Q3TSI5	E3 ubiquitin-protein ligase UBR5	Ubr5	8395100	8098000	0	7863800	0	9075400	0	0	0
Q4FK29;Q9R0Q8	Q4FK29;Q9R0Q8	C-type lectin domain family 4 member E	Clec4e	0	0	0	0	7947500	9078300	5679900	0	3782400
Q8CHY3	Q8CHY3	Dymeclin	Dym	0	6663700	7462300	5705700	9158800	9110400	6158900	0	0
B6YY24;Q3UVG3	B6YY24;Q3UVG3	Protein FAM91A1	D15Ertd621e;Fam91a1	13020000	11818000	12220000	14363000	10521000	9130300	12220000	10028000	0
E9PUA5;A0A068BFR6;Q9QWT9;Q5BJ94;Q9JKY9;G3UXN2;Q810Z7	E9PUA5;A0A068BFR6;Q9QWT9;Q5BJ94;Q9JKY9;G3UXN2	Kinesin-like protein;Kinesin-like protein KIFC1	Kifc5b;Kifc1	11856000	0	16245000	13347000	0	9154000	10963000	0	12902000
Q3UWF9;P97465	Q3UWF9;P97465	Docking protein 1	Dok1	7510400	11075000	8652400	11887000	8955100	9161200	11035000	0	10363000
Q8K0Q5	Q8K0Q5	Rho GTPase-activating protein 18	Arhgap18	9656800	11820000	12979000	0	6146500	9178300	0	10179000	0
Q8C5R8;Q32M04;Q9CVZ1	Q8C5R8;Q32M04;Q9CVZ1		Prps1l1	9102600	15153000	17315000	0	16508000	9184200	11767000	0	5541100
F8VPL2;Q61194;Q3UQN0	F8VPL2;Q61194;Q3UQN0	Phosphatidylinositol 4-phosphate 3-kinase C2 domain-containing subunit alpha	Pik3c2a	0	0	9772500	0	0	9305500	0	11896000	0
Q3TRG2;A2ASW6	Q3TRG2;A2ASW6		Zak	9686000	9844800	10319000	8300700	12185000	9317100	13708000	8689900	9098600
D3Z6V2;Q9JM62	D3Z6V2;Q9JM62	Receptor expression-enhancing protein;Receptor expression-enhancing protein 6	Reep6	14702000	0	9587800	0	8185800	9336800	6641400	0	7715300
Q542A1;Q61334	Q542A1;Q61334	B-cell receptor-associated protein 29	Bcap29	12128000	0	12305000	11038000	11897000	9361300	8344900	12093000	10117000
E9PZK7;Q8BXL7	E9PZK7;Q8BXL7	ADP-ribosylation factor-related protein 1	Arfrp1	8932300	0	9245100	0	8912100	9407100	7734500	11042000	9224300
A2AWI9;B0LDS3;A2AWI7;Q8R3V5	A2AWI9;B0LDS3;A2AWI7;Q8R3V5	Endophilin-B2	Sh3glb2	8871400	8138800	8682500	8067100	12528000	9414800	11658000	9482100	7087100
Q564P6;Q4FK34;P39689	Q564P6;Q4FK34;P39689	Cyclin-dependent kinase inhibitor 1	Cdkn1a	6502500	8159400	5159700	8769500	6855800	9417300	10509000	13415000	16589000
Q6IR00;F6QQ13;Q501P3;Q8C7M0;Q3TEC4;A2AQE2;Q6A098	Q6IR00;F6QQ13;Q501P3;Q8C7M0;Q3TEC4;A2AQE2;Q6A098	Selenocysteine insertion sequence-binding protein 2-like	Secisbp2l	0	8816100	0	0	5619500	9425400	7529600	9680700	0
A9UGK3;Q6VN19	A9UGK3;Q6VN19	Ran-binding protein 10	Ranbp10	8562400	0	8801900	0	0	9431600	0	0	10890000
Q3TUA8;Q6NZM8;Q3U647;Q60967	Q3TUA8;Q6NZM8;Q3U647;Q60967	Bifunctional 3-phosphoadenosine 5-phosphosulfate synthase 1;Sulfate adenylyltransferase;Adenylyl-sulfate kinase	Papss1	0	6057800	8817400	6963300	0	9455500	0	0	9957900
Q3TK92;Q9Z1K6;A0A0A6YXB0	Q3TK92;Q9Z1K6;A0A0A6YXB0	E3 ubiquitin-protein ligase ARIH2	Arih2	0	0	0	10415000	0	9483300	0	0	0
Q922R5;Q3V166;M0QW93;Q5M6W0	Q922R5;Q3V166	Serine/threonine-protein phosphatase 4 regulatory subunit 3B	Smek2	0	8691800	0	12271000	0	9522400	9965600	0	0
Q921K9	Q921K9	B-cell CLL/lymphoma 7 protein family member B	Bcl7b	13807000	14199000	9655400	13981000	0	9562800	10693000	11878000	0
Q3UM95;Q8BGQ1	Q3UM95;Q8BGQ1	Spermatogenesis-defective protein 39 homolog	Vipas39	0	0	8998600	7511000	9374800	9574200	9733100	9441300	10794000
Q3U9D1;O88512;Q3UHW6;D6RFT7	Q3U9D1;O88512;Q3UHW6	AP-1 complex subunit gamma-like 2	Ap1g2	15991000	0	16634000	0	0	9637400	12630000	14846000	11587000
A2AEB5;A2AEB4;A2AEB3;Q3U6G8;Q3TME1;Q3TXN7;Q9R0Q4;A2AEB8;A2AEB7;A2AEB6	A2AEB5;A2AEB4;A2AEB3;Q3U6G8;Q3TME1;Q3TXN7;Q9R0Q4;A2AEB8;A2AEB7;A2AEB6	Mortality factor 4-like protein 2	Morf4l2	0	0	0	0	0	9661000	14319000	24973000	0
D3Z5B2;Q3UFK8	D3Z5B2;Q3UFK8	FERM domain-containing protein 8	Frmd8	7874600	14372000	8490200	8578100	7206400	9669600	7135800	6818200	6280100
Q80XC2	Q80XC2	tRNA (adenine(58)-N(1))-methyltransferase catalytic subunit TRMT61A	Trmt61a	9999800	10673000	0	11399000	10781000	9671400	0	0	0
Q3URR2;E9QKT0;E9Q5E0;Q921S6;Q63943;S4R2H4;Q8C895;D3Z6M5;Q3V1B5;Q8CFN5;Q60929	Q3URR2;E9QKT0;E9Q5E0;Q921S6;Q63943;S4R2H4;Q8C895;D3Z6M5;Q3V1B5;Q8CFN5;Q60929	Myocyte-specific enhancer factor 2D;Myocyte-specific enhancer factor 2C;Myocyte-specific enhancer factor 2A	Mef2d;Mef2a;Mef2c	11442000	9020100	15299000	15387000	11682000	9706800	10109000	16850000	14307000
Q8K0E2;Q8BIT7;Q6KAR6	Q8K0E2;Q8BIT7;Q6KAR6	Exocyst complex component 3	Exoc3	12287000	11002000	14416000	10183000	16462000	9764700	10925000	11310000	12690000
Q80VP1	Q80VP1	Epsin-1	Epn1	10589000	8102900	8376800	8934100	8290900	9768600	6393900	4403000	0
D3YVV4;Q505Q3;Q99KR8	D3YVV4;Q505Q3;Q99KR8	Plasma alpha-L-fucosidase	Fuca2	0	9807300	9890400	8072600	8589100	9776600	10587000	8516100	0
E9PX94;Q8K1A6;Q8K2N4	E9PX94;Q8K1A6;Q8K2N4	Coiled-coil and C2 domain-containing protein 1A	Cc2d1a	9452900	8037900	8433900	8839000	9331000	9805200	9771700	10714000	10413000
A2AWN8;P59326;Q3TH60	A2AWN8;P59326	YTH domain-containing family protein 1	Ythdf1	13101000	7659500	10136000	10499000	9549100	9874600	8977800	8761300	10158000
Q8BI72	Q8BI72	CDKN2A-interacting protein	Cdkn2aip	11079000	10162000	9985300	8831400	7833600	9943100	8448500	0	11426000
G3X8R5;Q3UA37;Q922W2;Q8BUN3;Q8BMY0;A0A0A6YXZ6	G3X8R5;Q3UA37;Q922W2;Q8BUN3	Glutamine-rich protein 1	Qrich1	11619000	14017000	12281000	14535000	0	9945900	0	9570500	0
Q3V493;Q544R8;Q9ES56	Q3V493;Q544R8;Q9ES56	Trafficking protein particle complex subunit 4	Trappc4	0	12908000	11568000	7869100	13645000	9947100	12288000	15126000	18477000
Q6P6P5;Q3V0N8;Q924N4;Q3UVD1;A2AGJ9;Q3TPD4;Q6NXV2;Q3U9N0;Q3U689;Q3TWZ6;Q3TWV2;Q3TLV0;Q3TJM8;Q3TJG5;Q3UDQ8;F8WIJ0;Q9JIS8;Q6PFC8;A0A076FSX1;A0A076FR46;A0A076FRG6;Q91V14	Q6P6P5;Q3V0N8;Q924N4;Q3UVD1;A2AGJ9;Q3TPD4;Q6NXV2;Q3U9N0;Q3U689;Q3TWZ6;Q3TWV2;Q3TLV0;Q3TJM8;Q3TJG5;Q3UDQ8;F8WIJ0;Q9JIS8	Solute carrier family 12 member 6;Solute carrier family 12 member 4	Slc12a6;Slc12a4	0	0	7723800	10135000	14390000	9954400	12402000	13164000	10640000
Q0VDW9;Q64343	Q0VDW9;Q64343	ATP-binding cassette sub-family G member 1	Abcg1	12713000	18063000	16156000	10771000	0	9969500	7739300	14024000	11061000
Q99KV4;D0EW11;Q8K5B2;D3Z1G3	Q99KV4;D0EW11;Q8K5B2;D3Z1G3	Multiple coagulation factor deficiency protein 2 homolog	Mcfd2	9446200	8285400	9161200	0	8676600	10000000	11230000	7218700	8616000
Q8K327	Q8K327	Chromosome alignment-maintaining phosphoprotein 1	Champ1	17441000	13653000	13527000	14903000	12728000	10003000	12365000	12048000	9818300
A6H663;Q9JLV1;Q3TAM9	A6H663;Q9JLV1;Q3TAM9	BAG family molecular chaperone regulator 3	Bag3	10467000	12942000	12474000	12878000	0	10053000	10797000	12386000	7921000
D3YW42;G3UXR7;G3X927;Q8VC31	D3YW42;G3UXR7;G3X927;Q8VC31	Coiled-coil domain-containing protein 9	Ccdc9	14201000	13158000	12543000	12118000	13211000	10062000	0	13891000	12526000
Q921X9;Q9CSM8	Q921X9	Protein disulfide-isomerase A5	Pdia5	12025000	8496900	8087400	11194000	13008000	10088000	0	13270000	0
B2RY22;A0A087WS18;J3QP81;A5D6Q8;A0A087WRK0;A0A087WQF1;E9Q6L0;A0A087WQ95;A0A087WNW8;A0A087WP42;E9QNY9;A0A087WRE8;E9QKH0;A0A087WQ31;Q80TV8;A0A0A6YWK1;Q8R337;A0A0A6YXZ1	B2RY22;A0A087WS18;J3QP81;A5D6Q8;A0A087WRK0;A0A087WQF1;E9Q6L0;A0A087WQ95;A0A087WNW8;A0A087WP42;E9QNY9;A0A087WRE8;E9QKH0;A0A087WQ31;Q80TV8	CLIP-associating protein 1	Clasp1	10650000	9728900	13486000	10322000	12142000	10101000	13146000	14962000	15379000
S4R1V2;Q3TB92	S4R1V2;Q3TB92	Allergin-1	Milr1	8893600	0	8298500	9589800	6678700	10152000	11550000	10523000	14528000
D3Z792;Q924D0	D3Z792;Q924D0	Reticulon-4-interacting protein 1, mitochondrial	Rtn4ip1	17381000	16338000	18310000	14105000	0	10192000	0	0	0
G3UZY2;P97493	G3UZY2;P97493	Thioredoxin, mitochondrial	Txn2	18384000	13955000	0	16865000	0	10196000	17348000	13307000	0
Q6KCD5	Q6KCD5	Nipped-B-like protein	Nipbl	18366000	10670000	13194000	10773000	0	10230000	11125000	10555000	13866000
Q5SYD0;B2RWZ2;Q91ZI5;Q8K063;Q3UG58	Q5SYD0;B2RWZ2	Unconventional myosin-Id	Myo1d	12338000	7356000	8241600	10276000	11534000	10236000	0	0	0
Q8BLL4;A6H611	Q8BLL4;A6H611	Mitochondrial intermediate peptidase	Mipep	0	16088000	16616000	14089000	15061000	10254000	14316000	17360000	21291000
F6VG18;F6VTH5;Q3UHL8;Q8CDG8;Q9JHQ5	F6VG18;F6VTH5;Q3UHL8;Q8CDG8;Q9JHQ5	Leucine zipper transcription factor-like protein 1	Lztfl1	6217900	0	8223000	7440900	0	10273000	0	0	0
B1AVH7	B1AVH7	TBC1 domain family member 2A	Tbc1d2	13670000	0	10483000	6848400	7902700	10292000	0	0	0
Q9WV86	Q9WV86	Katanin p60 ATPase-containing subunit A1	Katna1	10432000	11381000	15147000	10023000	0	10321000	15772000	16798000	8596700
Q8K1N4	Q8K1N4	Spermatogenesis-associated serine-rich protein 2	Spats2	12094000	10577000	14503000	13993000	13207000	10372000	12908000	14189000	0
Q3UBZ2;Q9QXN3;Q3UJV0	Q3UBZ2;Q9QXN3;Q3UJV0	Activating signal cointegrator 1	Trip4	12308000	10425000	10551000	9543400	13215000	10376000	8586900	10904000	0
Q7TPS3;Q9JIQ3	Q7TPS3;Q9JIQ3	Diablo homolog, mitochondrial	Diablo	10223000	11603000	9914000	7289300	11031000	10379000	7562800	8040800	11769000
Q7TSI4;B2RXC6	Q7TSI4;B2RXC6	DNA-directed RNA polymerase	Polr3a	9306000	0	10903000	12583000	0	10383000	12388000	12179000	9826600
Q3TEF0;Q8BGZ4;G3X8W7	Q3TEF0;Q8BGZ4;G3X8W7	Cell division cycle protein 23 homolog	Cdc23	0	0	8942000	0	10420000	10411000	0	0	0
A2AQ19;Q3UXG8	A2AQ19;Q3UXG8	RNA polymerase-associated protein RTF1 homolog	Rtf1	0	12335000	9919700	14934000	10652000	10446000	13700000	12305000	16301000
Q8N7N5;A0A0A6YX55	Q8N7N5	DDB1- and CUL4-associated factor 8	Dcaf8	16720000	19549000	19516000	15883000	10610000	10448000	14256000	18567000	0
Q8QZV7;F7BP94	Q8QZV7;F7BP94	Protein asunder homolog	Asun	0	0	0	0	0	10526000	0	36226000	60280000
Q8K2I4	Q8K2I4	Beta-mannosidase	Manba	13536000	0	15631000	15892000	19994000	10536000	11940000	0	19277000
Q8VCV3;Q3TUM2;O88848;Q3U6U3;D3Z067	Q8VCV3;Q3TUM2;O88848;Q3U6U3;D3Z067	ADP-ribosylation factor-like protein 6	Arl6	9646200	11115000	12148000	8282700	0	10545000	12241000	6605600	0
Q05DL4;Q6ZQL8;Q6PEN2;Q2M1J9;Q29RG2;Q000W5;L7N1X8;Q3U8G5;Q7TMV8;I6L9A3;B9EJ74;Q2V6D6;Q5DTF3;Q61594;A4UUI3	Q05DL4;Q6ZQL8;Q6PEN2;Q2M1J9;Q29RG2;Q000W5;L7N1X8;Q3U8G5;Q7TMV8;I6L9A3;B9EJ74;Q2V6D6;Q5DTF3;Q61594;A4UUI3		Mpa2l;Gbp10;Gbp6;Gbp8;Gbp4	0	0	0	0	0	10553000	10665000	12305000	12231000
E9PU96;Q571H0	E9PU96;Q571H0	Nucleolar pre-ribosomal-associated protein 1	Urb1	9544300	11355000	7770900	10906000	9024800	10565000	8919600	9244100	7966200
Q3UJN9;E9Q284;Q5SU73;A6PWE1	Q3UJN9;E9Q284;Q5SU73;A6PWE1	Coilin	Coil	10444000	10061000	0	10195000	9612700	10585000	11375000	0	0
O09130	O09130	NFATC2-interacting protein	Nfatc2ip	13932000	0	11062000	0	11563000	10606000	0	9522800	6789900
Q8BHC7	Q8BHC7	Rhomboid-related protein 4	Rhbdd1	9983200	8767100	6606600	7455800	6838300	10607000	7727900	7772100	8298600
Q3UXU8;Q8K2X3	Q3UXU8;Q8K2X3	CST complex subunit STN1	Obfc1	10492000	12560000	15458000	10272000	11758000	10608000	11406000	0	0
Q8BYY4	Q8BYY4	Tetratricopeptide repeat protein 39B	Ttc39b	6648100	9076400	4973600	12068000	12353000	10619000	7301000	0	0
E0CZF6;E0CZ18;F8WHW3;E0CYE6;Q3TWL2	E0CZF6;E0CZ18;F8WHW3;E0CYE6;Q3TWL2	Type 1 phosphatidylinositol 4,5-bisphosphate 4-phosphatase	Tmem55b	16239000	0	15503000	13182000	11821000	10701000	0	16763000	17992000
A0A087WS03;A0A087WQ32;G3X9F1;Q9R1S3;A0A087WNT9	A0A087WS03;A0A087WQ32;G3X9F1;Q9R1S3;A0A087WNT9	GPI ethanolamine phosphate transferase 1	Pign	9958300	9100000	8114400	9055500	16335000	10705000	11598000	0	0
Q05BE7;Q9QZS3	Q05BE7;Q9QZS3	Protein numb homolog	Numb	15545000	0	12968000	18912000	16656000	10723000	0	16210000	18236000
D3Z7R0;Q3UCB5;Q3UC13;O55028;Q99KP1;Q8C6H9	D3Z7R0;Q3UCB5;Q3UC13;O55028;Q99KP1;Q8C6H9	[3-methyl-2-oxobutanoate dehydrogenase [lipoamide]] kinase, mitochondrial	Bckdk	10026000	15359000	10824000	15809000	3390100	10739000	16682000	16564000	8313100
Q9CWU2	Q9CWU2	Palmitoyltransferase ZDHHC13	Zdhhc13	9524300	12954000	11343000	12431000	7951000	10746000	11049000	8858100	9425800
Q80YC2	Q80YC2		Hsp90ab1	0	12192000	0	12371000	0	10766000	0	18480000	16763000
Q99NH8;Q3U2Q4	Q99NH8;Q3U2Q4	Triggering receptor expressed on myeloid cells 2	Trem2	17254000	18554000	10717000	12348000	0	10789000	11671000	14722000	11918000
D6RJ83;A6PWX5;F6V305;A6PWX8;A6PWX9;Q9CWU6	D6RJ83;A6PWX5;F6V305;A6PWX8;A6PWX9;Q9CWU6	Ubiquinol-cytochrome-c reductase complex assembly factor 1	Uqcc1	13472000	11979000	16134000	0	0	10803000	0	0	0
Q3UH60;B2RQC7;D3Z5G8	Q3UH60;B2RQC7;D3Z5G8	Disco-interacting protein 2 homolog B	Dip2b	14423000	13922000	10703000	11114000	6171200	10823000	0	9136100	7495600
Q9D270	Q9D270	Probable palmitoyltransferase ZDHHC21	Zdhhc21	3672000	6669100	10411000	3978600	16343000	10835000	8462300	0	0
Q80Y98	Q80Y98	Phospholipase DDHD2	Ddhd2	23298000	18742000	19555000	0	10882000	10846000	0	0	0
Q9D7E3	Q9D7E3	Ovarian cancer-associated gene 2 protein homolog	Ovca2	8631600	0	11391000	11654000	9494000	10870000	0	0	0
Q78YZ6	Q78YZ6	Short coiled-coil protein	Scoc	0	0	0	12314000	10777000	10881000	17803000	0	13283000
Q3U5J6;A0A087WQB0;Q3UIS6;Q569V4;P60762;Q5DTS9;Q3UBK1;A0A087WQ34	Q3U5J6;A0A087WQB0;Q3UIS6;Q569V4;P60762;Q5DTS9;Q3UBK1	Mortality factor 4-like protein 1	Morf4l1	13095000	13303000	23225000	26867000	0	10923000	14803000	19287000	20073000
Q99KZ1;Q9JIF6;Q9CRG6;Q3TVF4;P53612	Q99KZ1;Q9JIF6;Q9CRG6;Q3TVF4;P53612	Geranylgeranyl transferase type-2 subunit beta	Rabggtb	0	8842500	11468000	0	14503000	10923000	8942600	8942200	10911000
Q6P289;Q571M5;Q8C863;Q7TMG3;Q05CE4;Q3UV52;B9EKB3;Q8BZZ3	Q6P289;Q571M5;Q8C863;Q7TMG3;Q05CE4;Q3UV52;B9EKB3;Q8BZZ3	E3 ubiquitin-protein ligase Itchy;E3 ubiquitin-protein ligase;NEDD4-like E3 ubiquitin-protein ligase WWP1	Itch;Wwp1	6707800	6290900	12601000	12619000	12454000	10954000	12171000	14400000	16568000
Q9CVN2;Q4VC33	Q9CVN2;Q4VC33	Macrophage erythroblast attacher	Maea	14875000	15789000	14938000	0	0	10979000	0	0	0
Q9CRN9;Q91YN0	Q9CRN9;Q91YN0	Protein C12orf4 homolog	D6Wsu163e	0	0	8281100	0	0	10986000	0	8255500	5594100
Q80TJ7;A2ABV3;Z4YL84;A2ABU9;Q3UYU8;Q3UZ32;A2ABV1;Q9WTU0	Q80TJ7;A2ABV3;Z4YL84	Histone lysine demethylase PHF8	Phf8	15457000	0	12322000	0	10233000	10990000	12606000	0	9326600
Q9D7N6	Q9D7N6	39S ribosomal protein L30, mitochondrial	Mrpl30	16237000	17352000	15270000	15551000	12280000	11006000	0	18067000	16394000
E9Q199;Q8R2Y9	E9Q199;Q8R2Y9	SOSS complex subunit B1	Nabp2	13048000	12793000	11573000	16664000	7764700	11036000	15607000	17781000	14753000
Q8CB73;Q8BP50;Q6P252;Q69ZG0;Q6NV99;Q8BQC6	Q8CB73;Q8BP50;Q6P252;Q69ZG0;Q6NV99;Q8BQC6		Haus6;mKIAA1574	0	0	0	0	9437100	11079000	0	0	11777000
Q80ZQ9;D6RGQ6;F6ZCU9	Q80ZQ9;D6RGQ6;F6ZCU9	Protein Simiate	Fam206a	9276300	9579200	0	0	0	11087000	0	0	0
Q0VBA8;P06869	Q0VBA8;P06869	Urokinase-type plasminogen activator;Urokinase-type plasminogen activator long chain A;Urokinase-type plasminogen activator short chain A;Urokinase-type plasminogen activator chain B	Plau	0	0	0	0	12583000	11102000	0	0	9726100
Q3THP3;A1L361;Q9WUN2	Q3THP3;A1L361;Q9WUN2	Serine/threonine-protein kinase TBK1	Tbk1	12156000	18765000	13964000	21283000	9499600	11108000	0	8227600	0
Q8C693;Q8BN98;O88708;Q8BTB0;CON__Q2YDI2	Q8C693;Q8BN98;O88708;Q8BTB0;CON__Q2YDI2	Origin recognition complex subunit 4	Orc4	9704400	13621000	13272000	15647000	0	11209000	16318000	11969000	0
B1AWZ5;Q9CQE1	B1AWZ5;Q9CQE1	Protein NipSnap homolog 3B	Nipsnap3b	0	10391000	11129000	0	12082000	11238000	12650000	0	0
A2ADY9	A2ADY9	Protein DDI1 homolog 2	Ddi2	14256000	0	15205000	0	0	11241000	0	0	0
Q3U8Y1;Q3TLY7;Q9DCA2	Q3U8Y1;Q3TLY7;Q9DCA2	28S ribosomal protein S11, mitochondrial	Mrps11	0	21228000	0	18250000	0	11304000	0	0	0
B2RXC1	B2RXC1	Trafficking protein particle complex subunit 11	Trappc11	10456000	11419000	13929000	10791000	0	11306000	11974000	16880000	16297000
G3X9H7;Q6ZQB7;Q8R1S4	G3X9H7;Q6ZQB7;Q8R1S4	Metastasis suppressor protein 1	Mtss1	0	22372000	0	0	0	11322000	0	0	0
Q8BS95	Q8BS95	Golgi pH regulator	Gpr89a	8451900	0	14682000	0	13443000	11333000	0	0	0
Q3U0H6;Q3TZ80;B2RV69;Q5SYH2	Q3U0H6;Q3TZ80;B2RV69;Q5SYH2	Transmembrane protein 199	Tmem199	9067800	8907900	10289000	9971700	11778000	11368000	11786000	11316000	14047000
Q69Z99	Q69Z99	Zinc finger protein 512	Znf512	5957200	11331000	11638000	0	0	11372000	8364200	0	0
Q3U926;Q66GT5	Q3U926;Q66GT5	Phosphatidylglycerophosphatase and protein-tyrosine phosphatase 1	Ptpmt1	6279600	0	11711000	0	0	11399000	10803000	0	0
E9QLB8;Q566J8	E9QLB8;Q566J8	AarF domain-containing protein kinase 4	Adck4	11217000	14898000	13313000	8930300	12285000	11417000	11011000	11858000	12059000
Q3URE1	Q3URE1	Acyl-CoA synthetase family member 3, mitochondrial	Acsf3	0	14410000	12750000	0	0	11443000	0	0	0
Q66L45;Q3UHX9	Q66L45;Q3UHX9	Putative methyltransferase C9orf114 homolog	D2Wsu81e	11192000	0	10386000	0	0	11456000	11100000	13095000	0
Q3UJL1;E9Q2B0;Q501L4;Q3UAY3;Q8BMQ2	Q3UJL1;E9Q2B0;Q501L4;Q3UAY3;Q8BMQ2	General transcription factor 3C polypeptide 4	Gtf3c4	0	0	0	14118000	0	11478000	14167000	0	13718000
Q9DBY1;E9QQ99;D3Z1Y1;D3YZH4	Q9DBY1;E9QQ99;D3Z1Y1	E3 ubiquitin-protein ligase synoviolin	Syvn1	15338000	15987000	0	0	23171000	11487000	0	0	19299000
P62488	P62488	DNA-directed RNA polymerase II subunit RPB7	Polr2g	15180000	12246000	14211000	12790000	15187000	11495000	14223000	16477000	16147000
Q8R151;A2A5R4;A2A5R5;A2A5R6	Q8R151;A2A5R4;A2A5R5;A2A5R6	NFX1-type zinc finger-containing protein 1	Znfx1	0	0	0	10463000	12468000	11496000	17742000	20932000	0
Q9ET22	Q9ET22	Dipeptidyl peptidase 2	Dpp7	21019000	13231000	14944000	14132000	18161000	11496000	9002800	11053000	9589800
H3BKB1;H3BJY0;H3BLC2;Q8BMS7;H3BL44;Q69ZL4;Q3TVY6;H3BIX7;Q3UZR5;Q80XR2;H3BJJ5;Q3UWW0;H3BLI6	H3BKB1;H3BJY0;H3BLC2;Q8BMS7;H3BL44;Q69ZL4;Q3TVY6;H3BIX7;Q3UZR5;Q80XR2;H3BJJ5;Q3UWW0;H3BLI6	Calcium-transporting ATPase;Calcium-transporting ATPase type 2C member 1	Atp2c1	0	0	0	14818000	0	11500000	0	0	0
E9QME5;E9QP19;Q99PP7	E9QME5;E9QP19;Q99PP7	E3 ubiquitin-protein ligase TRIM33	Trim33	17119000	0	18168000	16544000	15549000	11507000	11442000	14283000	19590000
D3Z5I9;Q9CXK9	D3Z5I9;Q9CXK9	RNA-binding protein 33	Rbm33	0	12421000	12391000	11413000	11842000	11510000	0	0	17771000
Q9CS42	Q9CS42	Ribose-phosphate pyrophosphokinase 2	Prps2	19548000	0	19135000	17603000	14903000	11529000	20928000	0	0
A2A7A7;Q8CFX1;A2A7A8	A2A7A7;Q8CFX1;A2A7A8	GDH/6PGL endoplasmic bifunctional protein;Glucose 1-dehydrogenase;6-phosphogluconolactonase	H6pd	8185700	9615200	9814500	10492000	12910000	11535000	11691000	11601000	11635000
Q3TNS3;Q3TLD5	Q3TNS3;Q3TLD5	Unconventional prefoldin RPB5 interactor	Uri1	17195000	12560000	0	11919000	9844000	11546000	0	0	0
Q8BM29;Q05DT0;Q3UNK1;Q05C56;Q9QYB5;Q8BJH2	Q8BM29;Q05DT0;Q3UNK1;Q05C56;Q9QYB5;Q8BJH2	Gamma-adducin	Add3	17443000	0	15884000	15929000	0	11573000	9570600	10682000	7020100
E9Q394;E9Q474;Q3UEI5;F6VCM8;Q924X9	E9Q394;E9Q474;Q3UEI5;F6VCM8;Q924X9		Akap13	8480400	9102000	0	0	5649500	11573000	7763800	8271300	8683000
H9H9S3;Q3URW5;Q80TX6;Q9R0G7	H9H9S3;Q3URW5;Q80TX6;Q9R0G7	Zinc finger E-box-binding homeobox 2	Zeb2	11285000	0	0	0	0	11600000	0	0	0
F7B6X4;F6U2C2;Q3UX07;E9QM77;O70305;Q3UX51	F7B6X4;F6U2C2;Q3UX07;E9QM77;O70305;Q3UX51	Ataxin-2	Atxn2	13235000	16881000	17677000	11337000	12687000	11609000	21340000	0	18089000
Q6PGG8;Q80VL1	Q6PGG8;Q80VL1	Tudor and KH domain-containing protein	Tdrkh	14639000	12677000	0	14991000	11944000	11614000	12348000	0	0
Q60664;Q3TGD7;Q3TL84;F6WLY0;Q3TVR1;G5E880;Q3U560;Q3U583;Q3V325;F6VUK8;Q8BNX8;E9Q2C8;Q3V3H7	Q60664;Q3TGD7;Q3TL84;F6WLY0;Q3TVR1;G5E880;Q3U560;Q3U583	Lymphoid-restricted membrane protein;Processed lymphoid-restricted membrane protein	Lrmp	18148000	17949000	12740000	13472000	14206000	11628000	12240000	14039000	12184000
Q564F2;E9Q7K1;Q564G0;Q64520	Q564F2;E9Q7K1;Q564G0;Q64520	Guanylate kinase	Guk1	13059000	11573000	0	10903000	13734000	11629000	12657000	12350000	10944000
A0A0A6YVR9;V9GXE6;I6L9E0;Q3U3J6;P09925	A0A0A6YVR9;V9GXE6;I6L9E0;Q3U3J6;P09925	Surfeit locus protein 1	Surf1	8883300	9223500	0	0	6451900	11654000	0	16575000	12478000
Q7TMF2	Q7TMF2	3-5 exoribonuclease 1	Eri1	0	14466000	16048000	0	8025600	11655000	0	0	0
Q8C3Q0;Q9R0T0;Q4FJK5;Q8C3Q9;Q3TRE1;Q9R0S9;A2AS93	Q8C3Q0;Q9R0T0;Q4FJK5;Q8C3Q9;Q3TRE1;Q9R0S9;A2AS93	Caspase;Caspase-9;Caspase-9 subunit p35;Caspase-9 subunit p10	Casp9	0	13950000	0	13120000	10551000	11663000	0	16222000	0
A2A6Q5;Q3UYS3;Q8BYJ1;Q8R568	A2A6Q5	Cell division cycle protein 27 homolog	Cdc27	9001700	0	10933000	0	0	11720000	11304000	10504000	11682000
Q9D1Q3;Q3UCT9;Q3TVJ0;O89051;Q9JME4	Q9D1Q3;Q3UCT9;Q3TVJ0;O89051	Integral membrane protein 2B;BRI2, membrane form;BRI2 intracellular domain;BRI2C, soluble form;Bri23 peptide	Itm2b	0	11860000	0	13714000	15123000	11728000	19426000	13064000	16308000
Q3TU85;Q3TAI8;A1E2B8;Q61696;P17879	Q3TU85;Q3TAI8;A1E2B8;Q61696;P17879	Heat shock 70 kDa protein 1A;Heat shock 70 kDa protein 1B	Hspa1b;Hspa1a	12122000	9918000	0	22339000	0	11741000	11146000	12428000	16180000
Q9CPS7	Q9CPS7	RNA-binding protein PNO1	Pno1	11944000	0	14233000	0	11871000	11747000	26708000	0	0
Q8BGG7	Q8BGG7	Ubiquitin-associated and SH3 domain-containing protein B	Ubash3b	0	0	13624000	10861000	9297600	11765000	0	0	0
Q5U3K5	Q5U3K5	Rab-like protein 6	Rabl6	16538000	16517000	16033000	18200000	13403000	11775000	14242000	16953000	13868000
Q8K2M0	Q8K2M0	39S ribosomal protein L38, mitochondrial	Mrpl38	14332000	13407000	14959000	10958000	16610000	11800000	10999000	8598700	7845700
Q5F285	Q5F285	Transmembrane protein 256	Tmem256	0	12999000	0	0	0	11801000	0	0	0
F6ZL86;Q61712;F6WEH1	F6ZL86;Q61712;F6WEH1	DnaJ homolog subfamily C member 1	Dnajc1	0	15188000	11844000	0	12806000	11841000	0	0	0
Q8BGR9	Q8BGR9	Ubiquitin-like domain-containing CTD phosphatase 1	Ublcp1	12987000	0	11880000	9930100	0	11900000	15365000	16839000	16264000
Q8R3V2	Q8R3V2		Aimp2	11581000	14069000	11112000	15513000	12773000	11914000	0	13314000	14367000
Q9CT36;Q8BTJ3;A2APB8	Q9CT36;Q8BTJ3;A2APB8	Targeting protein for Xklp2	Tpx2	6137600	8540100	16407000	18106000	11784000	11918000	0	12654000	12831000
Q3UVJ7;Q3UEY0;Q3TR93;Q9WV68	Q3UVJ7;Q3UEY0;Q3TR93;Q9WV68	Peroxisomal 2,4-dienoyl-CoA reductase	Decr2	0	0	8599100	0	0	11921000	0	0	0
Q9EQE2;Q9EQE3;Q8R4T7;P49443	Q9EQE2;Q9EQE3;Q8R4T7;P49443	Protein phosphatase 1A	Ppm1a	16077000	16621000	13869000	13306000	9618200	11925000	12754000	13390000	11332000
Q3TDL0;Q8BV13	Q3TDL0;Q8BV13	COP9 signalosome complex subunit 7b	Cops7b	0	0	15128000	15089000	11837000	11925000	17220000	19643000	12254000
D3YYF2;E9Q7L3;D3Z1W6;E9Q7L2;D3Z1N4;E9Q4Y5;F8VQD1;Q8BSQ9;F6THL5;D6RIL0;D6RI94;D3Z3R4;Q9D7L7	D3YYF2;E9Q7L3;D3Z1W6;E9Q7L2;D3Z1N4;E9Q4Y5;F8VQD1;Q8BSQ9;F6THL5;D6RIL0;D6RI94;D3Z3R4	Protein polybromo-1	Pbrm1	11351000	13355000	13343000	12701000	0	11944000	12979000	15297000	10804000
Q80TG5;E9QNG1;B2RR82;Q9Z0R6;Q8CD59;Q3TQ85;Q3V3Y8	Q80TG5;E9QNG1;B2RR82;Q9Z0R6;Q8CD59;Q3TQ85;Q3V3Y8	Intersectin-2	mKIAA1256;Itsn2	8660600	7983300	9610200	10334000	6765400	11955000	6617200	16839000	14799000
Q66JW6;Q80Y44;Q7TMM1;Q8CFS2;Q8C751;Q8BRE3;Q3TKX5	Q66JW6;Q80Y44;Q7TMM1;Q8CFS2;Q8C751;Q8BRE3	Probable ATP-dependent RNA helicase DDX10	Ddx10	9624500	14229000	12618000	13265000	0	11981000	10957000	10881000	10880000
Q8BH15	Q8BH15	CCR4-NOT transcription complex subunit 10	Cnot10	12986000	10391000	9650800	8761000	0	11985000	10780000	9487700	0
Q3TC93;Q8C910	Q3TC93;Q8C910	HCLS1-binding protein 3	Hs1bp3	0	0	0	12981000	15564000	11986000	0	13854000	12298000
Q9CQU1	Q9CQU1	Microfibrillar-associated protein 1	Mfap1	13670000	15278000	9436200	10013000	13703000	12039000	0	0	0
Q9CQT5	Q9CQT5	Proteasome maturation protein	Pomp	15837000	11703000	20044000	18003000	12499000	12065000	24291000	11282000	12909000
Q8CD55;Q7TQE2;Q8CBM0;Q3TCR9;Q62523	Q8CD55;Q7TQE2;Q8CBM0;Q3TCR9;Q62523	Zyxin	Zyx	14047000	11925000	12254000	0	13743000	12088000	0	0	0
P28659	P28659	CUGBP Elav-like family member 1	Celf1	11203000	10388000	8869600	0	16750000	12099000	11970000	10391000	12159000
Q9R060	Q9R060	Cytosolic Fe-S cluster assembly factor NUBP1	Nubp1	10900000	17683000	12983000	10195000	12364000	12100000	0	0	0
Q8BHK9;Q8C4L5;Q99KE5	Q8BHK9	DNA excision repair protein ERCC-6-like	Ercc6l	9283800	0	11329000	8373200	8849600	12120000	11961000	10454000	8711500
Q52KE7;F6WST0;A4FUU8;F6WYR6	Q52KE7;F6WST0;A4FUU8;F6WYR6	Cyclin-L1	Ccnl1	12258000	13117000	0	11223000	11749000	12164000	10718000	9316700	12573000
Q8K1C9;Q3TCM6	Q8K1C9;Q3TCM6	Leucine-rich repeat-containing protein 41	Lrrc41	15197000	17489000	17063000	17780000	12792000	12179000	8269600	17326000	10081000
Q3TNB8;O88842	Q3TNB8;O88842	FYVE, RhoGEF and PH domain-containing protein 3	Fgd3	16202000	16155000	13553000	20982000	0	12210000	13091000	11591000	12444000
Q8R2K3;Q9CYR0	Q8R2K3;Q9CYR0	Single-stranded DNA-binding protein;Single-stranded DNA-binding protein, mitochondrial	Ssbp1	11955000	0	0	0	0	12212000	12104000	0	0
Q3V3A4;A0A068BGT0;Q8C754;G3UY33	Q3V3A4;A0A068BGT0;Q8C754;G3UY33	Vacuolar protein sorting-associated protein 52 homolog	Vps52	11428000	14104000	12473000	11276000	9849300	12227000	11677000	13692000	18869000
S4R219;Q91VV4	S4R219;Q91VV4	DENN domain-containing protein 2D	Dennd2d	12879000	13621000	9155000	10482000	12763000	12227000	9624100	9802100	7043300
Q8BW35;Q9R0H0;A2A848;Q8C168	Q8BW35;Q9R0H0;A2A848;Q8C168	Peroxisomal acyl-coenzyme A oxidase 1;Acyl-coenzyme A oxidase	Acox1	0	0	8075800	8986900	0	12251000	0	0	0
Q9CPW2	Q9CPW2	Adrenodoxin-like protein, mitochondrial	Fdx1l	10731000	0	6671200	0	0	12261000	0	0	12329000
Q8C547	Q8C547	HEAT repeat-containing protein 5B	Heatr5b	11433000	13915000	12406000	10828000	12366000	12263000	11277000	13866000	14562000
A0PJ57;Q76KJ5	A0PJ57;Q76KJ5	DNA-directed RNA polymerase I subunit RPA34	Cd3eap	11024000	12408000	14326000	14814000	0	12265000	11135000	0	0
B1AXR3;B1AXR5;Q8C5B5;Q9CY19;Q541S0;Q3U711;P43883	B1AXR3;B1AXR5;Q8C5B5;Q9CY19;Q541S0;Q3U711;P43883	Perilipin;Perilipin-2	Plin2	7591700	0	0	0	0	12335000	15488000	0	0
F8VQ93;Q8VDD9	F8VQ93;Q8VDD9	PH-interacting protein	Phip	0	0	12267000	0	0	12360000	13263000	13257000	0
Q7TMH5;Q9D1P0;F7CXG9;G5E909;Q05CB9	Q7TMH5;Q9D1P0;F7CXG9	39S ribosomal protein L13, mitochondrial	Mrpl13	13886000	17224000	17190000	11736000	12718000	12363000	8260300	19726000	9801300
Q8C7P1;Q6ZPT1;Q9CSA7;Q497T4;Q80TF4	Q8C7P1;Q6ZPT1;Q9CSA7;Q497T4;Q80TF4	Kelch-like protein 9;Kelch-like protein 13	Klhl9;Klhl13	10852000	0	10782000	0	0	12380000	0	0	10575000
Q9DBE8;F6RBY3	Q9DBE8	Alpha-1,3/1,6-mannosyltransferase ALG2	Alg2	10576000	13389000	13515000	0	10733000	12396000	9827000	17350000	16384000
Q9D0N7;D3YTP6;D3Z616	Q9D0N7	Chromatin assembly factor 1 subunit B	Chaf1b	0	0	0	0	13044000	12409000	16281000	12873000	35705000
E9Q0A7;Q4KMM3;B1H3M0;Q8CG81;B9EIW5;Q6DFV7	E9Q0A7;Q4KMM3;B1H3M0	Oxidation resistance protein 1	Oxr1	14352000	13122000	10268000	11498000	8878700	12439000	10009000	0	0
Q3UJM9;Q3U9K6;P70671;O54726;C0IXK2	Q3UJM9;Q3U9K6;P70671;O54726;C0IXK2	Interferon regulatory factor 3	Irf3;IRF3	14973000	18707000	16848000	16760000	14052000	12439000	0	12064000	17897000
A0A087WRY3;Q80XU3	A0A087WRY3;Q80XU3	Nuclear ubiquitous casein and cyclin-dependent kinase substrate 1	Nucks1	16067000	15622000	11927000	18730000	12563000	12484000	16358000	25663000	28612000
Q8VEB4	Q8VEB4	Group XV phospholipase A2	Pla2g15	8364200	7716400	7121300	7015900	8219100	12487000	0	7129500	0
Q80UY2	Q80UY2	E3 ubiquitin-protein ligase KCMF1	Kcmf1	0	11043000	13785000	12330000	9439600	12495000	12182000	15144000	14990000
Q9D2V5;Q8C161	Q9D2V5;Q8C161	Protein AAR2 homolog	Aar2	13899000	13237000	19205000	16299000	0	12496000	18667000	0	20347000
Q3UUQ7	Q3UUQ7	GPI inositol-deacylase	Pgap1	11919000	11479000	16839000	7907200	9924700	12513000	0	0	0
B7ZC46;B1AQY9;B1AQZ0;Q8CHH9	B7ZC46;B1AQY9;B1AQZ0;Q8CHH9	Septin-8	2018-09-08	11844000	11260000	8016000	11845000	8240500	12515000	10816000	9278100	8386600
Q3UDY2;Q9JI99;Q3U4P6	Q3UDY2;Q9JI99;Q3U4P6	Sphingosine-1-phosphate phosphatase 1	Sgpp1	12398000	0	12218000	14938000	13480000	12527000	8900600	0	0
Q99LS5;Q3TXY2;E9Q137;Q9D7D9	Q99LS5;Q3TXY2;E9Q137		Tex264	0	0	12669000	0	0	12540000	0	0	0
Q3UTU7;K4DI67;A0EQY3;Q6ZQK0;Q80W41	Q3UTU7;K4DI67;A0EQY3;Q6ZQK0;Q80W41	Condensin-2 complex subunit D3	Ncapd3	0	11297000	14398000	13739000	11338000	12558000	15052000	20998000	13558000
Q91YL3;F7CAK3;B7ZCR1;F6V4H6;D6RJ84	Q91YL3;F7CAK3;B7ZCR1;F6V4H6;D6RJ84	Uridine-cytidine kinase-like 1;Uridine-cytidine kinase	Uckl1	0	0	13887000	0	0	12561000	0	0	0
Q8K385	Q8K385	Ferric-chelate reductase 1	FRRS1	16557000	18880000	13267000	15759000	13248000	12583000	15121000	10388000	0
Q3TQI7	Q3TQI7	Uncharacterized protein C9orf78 homolog		20026000	15275000	19357000	16554000	13720000	12605000	14654000	15984000	14726000
Q8VCN9	Q8VCN9	Tubulin-specific chaperone C	Tbcc	15867000	0	0	0	0	12620000	20089000	13240000	0
Q3UHF9;Q3V1L7;B2RV73;Q8VHI3	Q3UHF9;Q3V1L7;B2RV73;Q8VHI3	GDP-fucose protein O-fucosyltransferase 2	Pofut2	12884000	13160000	10889000	14691000	14516000	12622000	12718000	16266000	10635000
Q3UGC8;Q91ZA3	Q3UGC8;Q91ZA3	Propionyl-CoA carboxylase alpha chain, mitochondrial	Pcca	51335000	54398000	61318000	75428000	0	12632000	27000000	24333000	38692000
E9Q4K7;A2AKI2;Q3V3Y9;Q8VI89;E9Q9B0;Q6A011;E7FLY0;F8VQ75;O35071;B1AVY7;Q9EQW7;Q80TF6	E9Q4K7;A2AKI2;Q3V3Y9;Q8VI89;E9Q9B0;Q6A011;E7FLY0;F8VQ75;O35071;B1AVY7;Q9EQW7;Q80TF6	Kinesin-like protein;Kinesin-like protein KIF1C;Kinesin-like protein KIF16B;Kinesin-like protein KIF13A;StAR-related lipid transfer protein 9	Kif13b;Stard9;Kif1c;Kif16b;Kif13a	0	0	13627000	0	17309000	12642000	13075000	0	0
Q6NVF4	Q6NVF4	DNA helicase B	Helb	0	9957600	14829000	16109000	12641000	12674000	13305000	18898000	12229000
Q4FZC9	Q4FZC9	Nesprin-3	Syne3	11127000	11740000	10635000	13797000	8998900	12728000	14670000	12592000	13277000
Q6P4T3;P97480	Q6P4T3;P97480	Eyes absent homolog;Eyes absent homolog 3	Eya3	0	0	8800200	0	0	12742000	9332900	0	0
H3BJY4;H3BLR8;B2KF67;I1E4X7;Q9JI46	H3BJY4;H3BLR8;B2KF67;I1E4X7;Q9JI46	Diphosphoinositol polyphosphate phosphohydrolase 1	Nudt3	11784000	12536000	12666000	16862000	9675000	12764000	8241700	14128000	13220000
Q8BGC0	Q8BGC0	HIV Tat-specific factor 1 homolog	Htatsf1	23325000	14012000	15506000	15826000	10476000	12764000	10480000	18182000	16795000
Q99L48	Q99L48	60S ribosomal export protein NMD3	Nmd3	13740000	12806000	16021000	0	11756000	12791000	12505000	13851000	14675000
H3BL13;G3XA18;Q3V023;Q9D7V9	H3BL13;G3XA18;Q3V023;Q9D7V9	N-acylethanolamine-hydrolyzing acid amidase;N-acylethanolamine-hydrolyzing acid amidase subunit alpha;N-acylethanolamine-hydrolyzing acid amidase subunit beta	Naaa	10680000	0	10971000	10007000	17146000	12818000	10462000	10907000	0
Q6ZQ03	Q6ZQ03	Formin-binding protein 4	Fnbp4	15033000	0	15310000	14594000	15582000	12822000	11359000	15187000	16070000
Q8R3K3	Q8R3K3	Pentatricopeptide repeat-containing protein 2, mitochondrial	Ptcd2	17705000	14813000	14773000	14473000	17081000	12833000	13452000	19407000	0
B2RRE7;G3UXQ0	B2RRE7	OTU domain-containing protein 4	Otud4	9744900	11115000	15973000	12110000	14021000	12845000	12034000	17168000	0
Q8JZN7;H3BKL2;H3BL14;Q8R581;H3BKJ1	Q8JZN7;H3BKL2;H3BL14;Q8R581;H3BKJ1	Mitochondrial Rho GTPase 2	Rhot2;Gm20683	0	17568000	16895000	19468000	13408000	12851000	12514000	14008000	10569000
Q9QZH3	Q9QZH3	Peptidyl-prolyl cis-trans isomerase E	Ppie	11988000	13987000	12644000	15638000	0	12854000	0	15017000	16094000
H3BJ02;H3BJE3;I1E4X1;Q8K1E0	H3BJ02;H3BJE3;I1E4X1;Q8K1E0	Syntaxin-5	Stx5a;Stx5	11474000	11216000	10624000	12502000	12950000	12897000	11906000	0	0
Q9CZX0	Q9CZX0	Elongator complex protein 3	Elp3	12426000	10397000	13015000	10161000	13837000	12901000	13163000	0	12491000
Q3UDH2;Q9Z2F2;Q8K234	Q3UDH2;Q9Z2F2;Q8K234	2-5-oligoadenylate synthase-like protein 2	Oasl2	0	0	0	0	18676000	12958000	27278000	25237000	32425000
Q3UMU9	Q3UMU9	Hepatoma-derived growth factor-related protein 2	Hdgfrp2	20955000	20274000	20070000	16876000	17682000	12971000	16329000	17893000	22528000
Q8CIM5	Q8CIM5	G-protein coupled receptor 84	Gpr84	0	0	0	0	13717000	13009000	0	9297200	7762400
B2RWR2	B2RWR2		Lpcat2	9958700	7880700	16274000	8835700	13965000	13016000	15179000	12152000	0
Q9D787;Q8BUY4	Q9D787;Q8BUY4	Peptidyl-prolyl cis-trans isomerase-like 2	Ppil2	17163000	22269000	21683000	25116000	14407000	13016000	18933000	18390000	21089000
Q3U7B7;Q3U480;Q8BMC4	Q3U7B7;Q3U480;Q8BMC4	Nucleolar protein 9	Nop9	10302000	13116000	12330000	10518000	14818000	13020000	12140000	12065000	12538000
B2FDH0;D3YW10;D3YXD1;Q91W82;P52483	B2FDH0;D3YW10;D3YXD1;Q91W82;P52483	Ubiquitin-conjugating enzyme E2 E2;Ubiquitin-conjugating enzyme E2 E3	Ube2e3;Ube2e2	9989400	0	0	13838000	9747900	13033000	11351000	0	0
P33174;Q3UXW0;Q3UWH4	P33174;Q3UXW0	Chromosome-associated kinesin KIF4;Kinesin-like protein	Kif4	8559900	0	23095000	21439000	13241000	13070000	16768000	0	17923000
D3YY98;Q8VDS8	D3YY98;Q8VDS8	Syntaxin-18	Stx18	0	0	15246000	0	0	13094000	0	0	0
Q9WVL0	Q9WVL0	Maleylacetoacetate isomerase	Gstz1	15840000	17504000	19013000	14190000	15511000	13102000	14074000	17020000	16330000
A3KMD2;Q8BIV3	A3KMD2;Q8BIV3	Ran-binding protein 6	Ranbp6	0	21901000	18870000	21569000	16033000	13137000	0	11787000	23761000
F8WGW3;Q497V5;B7ZWI4;Q8CHZ0	F8WGW3;Q497V5;B7ZWI4;Q8CHZ0	S1 RNA-binding domain-containing protein 1	Srbd1	0	0	13150000	11865000	9292300	13148000	11507000	9108100	9077400
G3UY39;Q3UIA1;P19426	G3UY39;Q3UIA1;P19426	Negative elongation factor E	Nelfe	13229000	13629000	11307000	11475000	0	13155000	10974000	10399000	0
P46737;E9Q0P6;A3KGA8	P46737	Lys-63-specific deubiquitinase BRCC36	Brcc3	0	17994000	0	0	15593000	13194000	0	0	0
B1AU74;Q9CWP6;Q3U0U1	B1AU74;Q9CWP6;Q3U0U1	Motile sperm domain-containing protein 2	Mospd2	0	0	0	0	21549000	13215000	19501000	16522000	0
E9Q4P1;Q5DTX9;Q8R3I5;D3YWG9;A0A087WPX9;D3Z057;Q9DAD3	E9Q4P1;Q5DTX9;Q8R3I5		Wdfy1	12536000	14368000	0	0	15051000	13270000	15710000	18925000	11832000
Q9CRA8;Q3U2K4	Q9CRA8;Q3U2K4	Exosome complex component RRP46	Exosc5	11911000	13965000	14855000	15162000	0	13312000	0	0	0
Q53WR6;Q61543;F8WHM5;F6RSH1;Q8BQH1;E9PWD8;Q3TMG0	Q53WR6;Q61543;F8WHM5	Golgi apparatus protein 1	Glg1	452870000	503410000	346580000	403640000	0	13312000	0	40813000	20858000
Q99M08	Q99M08	Uncharacterized protein C4orf3 homolog		10385000	0	8949300	0	0	13323000	0	0	0
S4R1D4;B2RXW8;B2RXQ2;B8QI33	S4R1D4;B2RXW8;B2RXQ2;B8QI33		Ppfia1	0	10138000	10348000	11035000	10554000	13340000	0	15591000	12697000
D3YZ98;E9QLS6;Q6PF93	D3YZ98;E9QLS6;Q6PF93	Phosphatidylinositol 3-kinase;Phosphatidylinositol 3-kinase catalytic subunit type 3	Pik3c3	16433000	20147000	16318000	15855000	14885000	13343000	14410000	23548000	0
Q3UT02;E9Q066;G3X9Q6;Q8BWW4;Q3T9Z3	Q3UT02;E9Q066;G3X9Q6;Q8BWW4	La-related protein 4	Larp4	13832000	14499000	12518000	23178000	7983100	13344000	12143000	15094000	17148000
Q8R126;Q8VD18;Q8BTX4;Q8BK35;Q9CV23	Q8R126;Q8VD18;Q8BTX4;Q8BK35;Q9CV23		Gltscr2	18119000	18446000	20589000	21523000	0	13355000	21696000	20846000	20293000
Q8BY87;Q3UB96	Q8BY87	Ubiquitin carboxyl-terminal hydrolase 47	Usp47	8844800	18344000	16884000	0	11216000	13364000	17591000	11382000	15388000
Q8BWA0;Q8R5G7	Q8BWA0;Q8R5G7	Arf-GAP with Rho-GAP domain, ANK repeat and PH domain-containing protein 3	Arap3	0	0	10929000	9366300	12803000	13370000	11779000	0	0
Q68FN3;Q3U1Z8;Q52KC0;Q8BU04;Q6PDS2	Q68FN3;Q3U1Z8;Q52KC0;Q8BU04;Q6PDS2	Putative E3 ubiquitin-protein ligase UBR7	Ubr7	11531000	0	13945000	16521000	0	13372000	0	0	0
E9QMX7;Q640N3;B2RSI0;A6X8Z5	E9QMX7;Q640N3	Rho GTPase-activating protein 30	Arhgap30	19452000	13263000	20076000	15725000	18180000	13387000	11412000	18548000	20454000
G5E823;Q99KK9;Q99KH0	G5E823;Q99KK9	Probable histidine--tRNA ligase, mitochondrial	Hars2	25767000	17041000	16249000	13408000	0	13399000	20118000	0	0
Q8BGU5	Q8BGU5	Cyclin-Y	Ccny	15230000	19591000	14614000	9922100	0	13429000	0	13797000	12430000
Q9R1Z7	Q9R1Z7	6-pyruvoyl tetrahydrobiopterin synthase	Pts	24304000	18160000	17063000	13971000	15705000	13429000	0	12609000	11405000
D3Z1E6;Q6NZC0;E9PYF2;O35598	D3Z1E6;Q6NZC0;E9PYF2;O35598	Disintegrin and metalloproteinase domain-containing protein 10	Adam10	13288000	0	15406000	9152300	0	13477000	0	9627700	9288500
Q571D8;Q3U325;Q80XQ2;Q3UN43;Q4KMV6;Q8CC81	Q571D8;Q3U325;Q80XQ2;Q3UN43;Q4KMV6	TBC1 domain family member 5	Tbc1d5	16169000	13942000	14746000	11847000	11444000	13489000	13942000	0	0
Q9EPK6	Q9EPK6	Nucleotide exchange factor SIL1	Sil1	0	0	0	0	15783000	13523000	0	15861000	0
J3QNE8;Q5I012;Q99JV6;Q7TMR2	J3QNE8;Q5I012;Q99JV6	Putative sodium-coupled neutral amino acid transporter 10	Slc38a10	11246000	13874000	10218000	12599000	7435200	13608000	12780000	14092000	18071000
Q99J93	Q99J93	Interferon-induced transmembrane protein 2	Ifitm2	23726000	18389000	11444000	16650000	20189000	13609000	20384000	18427000	22839000
A0A068BEQ2;P50171;G3UX44	A0A068BEQ2;P50171;G3UX44	Estradiol 17-beta-dehydrogenase 8	H2-Ke6;Hsd17b8	20886000	23557000	17009000	15958000	19484000	13627000	0	13459000	19890000
P60898;D3Z3Z8;D3YYI3;D3YYI2	P60898;D3Z3Z8;D3YYI3;D3YYI2	DNA-directed RNA polymerase II subunit RPB9;DNA-directed RNA polymerase subunit	Polr2i	15969000	0	17990000	18635000	0	13630000	0	12406000	17516000
B2RR26;Q9CW64;Q8BZW8	B2RR26;Q9CW64;Q8BZW8	NHL repeat-containing protein 2	Nhlrc2	16887000	15958000	0	0	12917000	13658000	11926000	16064000	14011000
G3X963;Q8CDM1;Q8K282;Q9CSS4;Q6IQY4	G3X963;Q8CDM1	ATPase family AAA domain-containing protein 2	Atad2	23460000	17860000	22759000	27223000	18826000	13670000	21889000	24777000	26343000
P27641;Q9CRI5	P27641	X-ray repair cross-complementing protein 5	Xrcc5	20188000	17592000	18687000	0	18379000	13679000	15779000	13762000	16815000
Q3UD72;Q8BU22;Q922S8;Q3TTL2;A2AE72	Q3UD72;Q8BU22;Q922S8;Q3TTL2	Kinesin-like protein;Kinesin-like protein KIF2C	Kif2c	0	8684500	14093000	20074000	11946000	13684000	15164000	14603000	22071000
Q14A90;Q9D7B1	Q14A90;Q9D7B1	tRNA-dihydrouridine(20) synthase [NAD(P)+]-like	Dus2	0	10689000	10842000	11260000	0	13691000	13250000	14525000	14153000
Q80UI8;Q3ULL6;Q9CS15;Q149I6;F6Q8N5	Q80UI8;Q3ULL6;Q9CS15;Q149I6;F6Q8N5		Upf3b	22294000	22333000	12675000	15733000	12881000	13707000	20874000	25504000	27956000
D3YVF8;D3Z4C3;B7ZWA9;O88939	D3YVF8;D3Z4C3;B7ZWA9;O88939	Zinc finger and BTB domain-containing protein 7A	Zbtb7a	12039000	13641000	11301000	8983200	0	13708000	10268000	12183000	11733000
O35969	O35969	Guanidinoacetate N-methyltransferase	Gamt	0	20234000	14198000	11338000	0	13760000	0	0	0
G5E884;O88643;Q8K0Z3;Q811J8;Q5DTJ2;B1GX80;B1GX81;Q61036;Q8BGF1;Q8BVX1;A3KGC3;S4R2K7;A3KGC4;A3KGC5	G5E884;O88643;Q8K0Z3;Q811J8;Q5DTJ2;B1GX80;B1GX81;Q61036	Non-specific serine/threonine protein kinase;Serine/threonine-protein kinase PAK 1;Serine/threonine-protein kinase PAK 3	Pak1;Pak2;Pak3	15868000	17026000	18801000	24156000	0	13760000	0	18709000	16638000
Q3UGE9;Q3TTV6;Q9ERA6;Q3TPF9	Q3UGE9;Q3TTV6;Q9ERA6;Q3TPF9	Tuftelin-interacting protein 11	Tfip11	11461000	0	0	0	0	13828000	0	0	0
Q9Z2P7;Q91XH6;Q3TUP8;O88384;F6UHS3	Q9Z2P7;Q91XH6;Q3TUP8;O88384;F6UHS3	Vesicle transport through interaction with t-SNAREs homolog 1B	Vti1b	0	17458000	0	0	17011000	13839000	11382000	12621000	12653000
Q52KC5;Q9CQP3	Q52KC5;Q9CQP3	Coiled-coil-helix-coiled-coil-helix domain-containing protein 5	Chchd5	18916000	14881000	11898000	13977000	11730000	13905000	0	0	13533000
Q3U4K3;Q3U422;Q91WP8	Q3U4K3;Q3U422;Q91WP8		Ndufv3	13453000	0	11461000	17196000	0	13924000	0	0	0
O89050;F6UW85;Q3UWT3	O89050	Muskelin	Mkln1	0	0	18204000	18455000	16092000	13987000	0	0	0
Q3TKR5	Q3TKR5		Rpl5	15083000	17845000	15956000	23450000	12632000	14072000	0	23544000	21478000
A2CG35;P35283	A2CG35;P35283	Ras-related protein Rab-12	Rab12	6686600	6798900	6309100	0	10484000	14086000	9258900	12765000	11178000
P51949;A0A087WSG5;A4FUR7	P51949	CDK-activating kinase assembly factor MAT1	Mnat1	18060000	15391000	19589000	18439000	16047000	14086000	23645000	17482000	0
Q3UKM9;Q3U3A7;E9Q794;A4FTZ3;Q6ZPV1;Q3UII8;Q924K8;Q3TY62;H3BLE1;H3BIY7	Q3UKM9;Q3U3A7;E9Q794;A4FTZ3;Q6ZPV1;Q3UII8;Q924K8;Q3TY62;H3BLE1	Metastasis-associated protein MTA3	Mta3	12515000	14091000	12309000	11824000	16671000	14095000	0	11554000	0
Z4YM84;E9QNH7;Q5CZX6;Q5XG73;E0CXU7;E9Q289;Q80X94	Z4YM84;E9QNH7;Q5CZX6;Q5XG73;E0CXU7;E9Q289;Q80X94	Acyl-CoA-binding domain-containing protein 5	Acbd5;Acbd4	14528000	10167000	11773000	11872000	11454000	14124000	12414000	10541000	9896600
Q8K0G5	Q8K0G5	Protein TSSC1	Tssc1	24607000	19897000	19483000	19110000	14209000	14139000	17250000	17510000	17251000
Q61107;D3YVW6;D3YUH5	Q61107	Guanylate-binding protein 4	Gbp4	0	0	0	0	21306000	14165000	16862000	24159000	24405000
E9PWW9;E9Q4Y2;Q3V3T8;Q3UJ04;Q3UK64;Q3UUS5	E9PWW9;E9Q4Y2;Q3V3T8;Q3UJ04;Q3UK64		Rsf1	17908000	15893000	11115000	17726000	14362000	14198000	16949000	19874000	20436000
G3X8S8;E0CY96;Q8R3W5	G3X8S8;E0CY96;Q8R3W5	tRNA-splicing endonuclease subunit Sen15	Tsen15	19749000	20628000	31661000	28716000	16398000	14218000	20431000	27850000	29970000
Q8K1A2;Q6ZQH1;Q9CZ15	Q8K1A2;Q6ZQH1;Q9CZ15	DNA replication complex GINS protein PSF1	Gins1	0	15125000	0	18688000	11970000	14225000	0	0	0
D3Z0G0;Q8C608;Q3V2R8;Q9EQ80	D3Z0G0;Q8C608;Q3V2R8;Q9EQ80	NIF3-like protein 1	Nif3l1	14219000	14334000	11284000	0	0	14229000	0	0	0
Q3TZ63;Q8R3D1;D6RI34;D6RJI8	Q3TZ63;Q8R3D1;D6RI34;D6RJI8	TBC1 domain family member 13	Tbc1d13	10595000	9871500	11437000	9607300	11236000	14244000	12359000	4620500	0
Q8R059	Q8R059	UDP-glucose 4-epimerase	Gale	11354000	18412000	10731000	14357000	0	14272000	10349000	11207000	11813000
D3Z0T5;Q8BQ47	D3Z0T5;Q8BQ47	Protein canopy homolog 4	Cnpy4	19006000	18576000	15936000	20672000	17278000	14280000	18230000	15747000	16682000
Q5XJE5	Q5XJE5	RNA polymerase-associated protein LEO1	Leo1	19718000	18467000	16312000	0	19034000	14299000	18216000	0	18844000
P63330	P63330	Serine/threonine-protein phosphatase 2A catalytic subunit alpha isoform	Ppp2ca	16236000	16516000	18218000	15886000	0	14310000	15077000	22486000	23013000
Q3THH0;Q9ESD6	Q3THH0;Q9ESD6	CKLF-like MARVEL transmembrane domain-containing protein 7	Cmtm7	12964000	13246000	18926000	20323000	17258000	14315000	19355000	15448000	22890000
E9PVF1;B4XVQ1	E9PVF1;B4XVQ1		Gm6904;Phf11b	0	0	0	0	9000100	14348000	15116000	20848000	30257000
P60904;G5E8T0;Q921J3;A2AUE1	P60904;G5E8T0;Q921J3	DnaJ homolog subfamily C member 5	Dnajc5	17214000	0	26382000	19582000	24041000	14350000	19870000	20065000	17976000
Q5D096;P04370;F6TYB7	Q5D096;P04370;F6TYB7	Myelin basic protein	Mbp	11410000	18603000	18215000	28687000	14825000	14402000	0	0	12886000
Q9D682;V9GXK6;Q8R1U3;Q3TDX5;Q3U182	Q9D682;V9GXK6;Q8R1U3;Q3TDX5;Q3U182	CREB-regulated transcription coactivator 2	Crtc2	0	18108000	12980000	14835000	13865000	14424000	15273000	13109000	13749000
Q9DBG9	Q9DBG9	Tax1-binding protein 3	Tax1bp3	19743000	16442000	16118000	19235000	16889000	14440000	15538000	19591000	12254000
Q8BHC4;B0QZX9	Q8BHC4;B0QZX9	Dephospho-CoA kinase domain-containing protein	Dcakd	8522100	7155300	13771000	9915900	15672000	14459000	20655000	12284000	16446000
Q6A0E5;Q99LH2	Q6A0E5;Q99LH2	Phosphatidylserine synthase 1	mKIAA0024;Ptdss1	12559000	0	12494000	0	13713000	14480000	13140000	0	0
Q9Z1Q2;G3UX11	Q9Z1Q2	Abhydrolase domain-containing protein 16A	Abhd16a	8127100	14242000	13595000	10134000	14962000	14500000	0	14237000	14383000
Q9QZB7	Q9QZB7	Actin-related protein 10	Actr10	11413000	0	13825000	11082000	10055000	14509000	11286000	7940500	0
A0A0A6YVP4;Q9CPR5	A0A0A6YVP4;Q9CPR5	39S ribosomal protein L15, mitochondrial	Mrpl15	23521000	0	23946000	26250000	0	14530000	22586000	25227000	28692000
D3YTU2;Q3U0K8	D3YTU2;Q3U0K8	Prolyl 3-hydroxylase OGFOD1	Ogfod1	0	0	0	0	0	14562000	0	16493000	14757000
B9EHZ5;Q3UN60;Q9JLB0;Q8BP37;Q6NSS8;Q811G2	B9EHZ5;Q3UN60;Q9JLB0;Q8BP37	MAGUK p55 subfamily member 6	Mpp6	18353000	18961000	21241000	16809000	16769000	14571000	14909000	14573000	16907000
Q6KAM0;Q99PL6	Q6KAM0;Q99PL6	UBX domain-containing protein 6	Ubxn6	16009000	12966000	13230000	12400000	0	14589000	0	12683000	9066500
X1WI15;A0A0A0MQK0;Q3TYS2	X1WI15;A0A0A0MQK0;Q3TYS2	Uncharacterized protein C17orf62 homolog	BC017643	14686000	13319000	0	10184000	12943000	14597000	13886000	0	0
B7ZNX2;P53995;Q3UE43;Q3TP10;A2ATQ5	B7ZNX2;P53995	Anaphase-promoting complex subunit 1	Anapc1	16227000	16713000	20266000	15362000	15103000	14641000	16583000	20773000	19973000
K4DI77;Q5ND34;F6XD87	K4DI77;Q5ND34	WD repeat-containing protein 81	Wdr81	51689000	33909000	49111000	34472000	0	14660000	18125000	36996000	0
K3W4Q9;Q8BH60;Q3TAF1	K3W4Q9;Q8BH60	Golgi-associated PDZ and coiled-coil motif-containing protein	Gopc	13543000	9941500	12881000	15141000	0	14676000	0	0	15168000
Q8BGD6	Q8BGD6	Sodium-coupled neutral amino acid transporter 9	Slc38a9	10201000	9839400	9519200	9650200	0	14706000	0	6893300	0
Q3TPD9;Q3UJ53;Q3U2X5;Q64133	Q3TPD9;Q3UJ53;Q3U2X5;Q64133	Amine oxidase [flavin-containing] A	Maoa	19228000	12003000	17540000	13852000	14092000	14707000	16256000	16057000	14232000
Q9CZV9;Q9D771	Q9CZV9;Q9D771	Transmembrane protein 206	Tmem206	9886400	9590400	9822000	9252000	12895000	14733000	13546000	0	0
Q3UJK6;Q8VDQ8	Q3UJK6;Q8VDQ8	NAD-dependent protein deacetylase sirtuin-2	Sirt2	14978000	13199000	14121000	12345000	14682000	14755000	14047000	7163800	0
O08715	O08715	A-kinase anchor protein 1, mitochondrial	Akap1	17410000	0	15583000	17051000	12441000	14761000	19820000	0	0
Q9D517;C4B4E7;Q3TXT9	Q9D517;C4B4E7;Q3TXT9	1-acyl-sn-glycerol-3-phosphate acyltransferase gamma	Agpat3	0	0	11859000	10730000	13128000	14787000	0	13176000	0
Q56A08;F6XU64	Q56A08;F6XU64	G patch domain and KOW motifs-containing protein	Gpkow	15029000	18770000	18879000	22191000	13736000	14795000	0	22828000	19241000
Q14BZ3;P70202	Q14BZ3;P70202	Latexin	Lxn	11088000	11469000	9736300	12482000	0	14830000	12856000	0	12303000
Q8CH02	Q8CH02	SURP and G-patch domain-containing protein 1	Sugp1	13003000	14815000	13305000	12885000	13072000	14889000	13272000	16157000	14114000
F6YT69;D3Z2E3;F6R6F1;E9Q632;O54916;F7AB82	F6YT69;D3Z2E3;F6R6F1;E9Q632;O54916;F7AB82	RalBP1-associated Eps domain-containing protein 1	Reps1	18561000	0	12176000	14112000	0	14919000	13578000	13071000	16828000
Q3V2X9;H3BK84;P31324	Q3V2X9;H3BK84;P31324	cAMP-dependent protein kinase type II-beta regulatory subunit	Prkar2b	10660000	13131000	0	12038000	12410000	14974000	7675000	0	0
Q8C4Y1;B2RS19;P28574	Q8C4Y1;B2RS19;P28574	Protein max	Max	16757000	17837000	14275000	16579000	17794000	14974000	15586000	18358000	21423000
Q8JZR2;Q5ND50;Q920I1;Q91VM1;Q5ND51;Q64010;Q3TQV3;F7D232;Q8BPE7	Q8JZR2;Q5ND50;Q920I1;Q91VM1;Q5ND51;Q64010;Q3TQV3;F7D232;Q8BPE7	Adapter molecule crk	Crk	16240000	16653000	15968000	12231000	14811000	15006000	13976000	9464900	11455000
E9Q449;A6H8H2;Q3U2Y9	E9Q449;A6H8H2	DENN domain-containing protein 4C	Dennd4c	23925000	16580000	14115000	15997000	15983000	15032000	20296000	29627000	0
D3YXP6;Q3THA3;Q9D1G2	D3YXP6;Q3THA3;Q9D1G2	Phosphomevalonate kinase	Pmvk	11492000	0	12117000	19453000	0	15044000	0	17314000	16857000
Q9JKP8;D3Z0U4	Q9JKP8;D3Z0U4	Chromatin accessibility complex protein 1	Chrac1	21186000	14536000	13553000	21450000	20549000	15087000	17147000	14984000	0
E9Q6J5;Q80TF0;O35243;Q3TR39;Q3USW6;Q8BHG7	E9Q6J5;Q80TF0;O35243		Bod1l	13300000	23443000	20017000	18643000	11201000	15089000	11877000	17793000	0
E9PZY8;A2AIV2;Q8CFK9	E9PZY8;A2AIV2	Protein virilizer homolog	1110037F02Rik;Kiaa1429	9379100	15445000	22069000	16029000	11574000	15095000	19044000	18773000	17189000
Q9D853	Q9D853	Protein-lysine N-methyltransferase Mettl10	Mettl10	13070000	0	0	12044000	9558200	15122000	14861000	12599000	12806000
Q3U9G8;P51908;Q3TLN2	Q3U9G8;P51908;Q3TLN2	C->U-editing enzyme APOBEC-1	Apobec1	16539000	15667000	22261000	8309200	0	15132000	20186000	0	24646000
Q62048;D3Z375	Q62048;D3Z375	Astrocytic phosphoprotein PEA-15	Pea15;Pea15a	32391000	36424000	16112000	21904000	28301000	15132000	9479200	0	31062000
Q61823	Q61823	Programmed cell death protein 4	Pdcd4	0	0	0	0	13047000	15136000	23188000	0	0
D3YUW8;D3YUX1;Q3TSQ2;Q0VGT3;B9EIG6;Q8BZH4	D3YUW8;D3YUX1;Q3TSQ2;Q0VGT3;B9EIG6;Q8BZH4	Pogo transposable element with ZNF domain	Pogz	17525000	13034000	13686000	13632000	7454500	15146000	10338000	0	0
E0CZ81;Q8CIV8	E0CZ81;Q8CIV8	Tubulin-specific chaperone E	Tbce	12409000	0	0	13967000	12134000	15158000	15623000	0	13350000
Q9DBQ7	Q9DBQ7	Protein-associating with the carboxyl-terminal domain of ezrin	Scyl3	13771000	14579000	17134000	14003000	16101000	15206000	13322000	17230000	16094000
Q8VCW8	Q8VCW8	Acyl-CoA synthetase family member 2, mitochondrial	Acsf2	23512000	20710000	15652000	14969000	0	15217000	0	13109000	17037000
P35831	P35831	Tyrosine-protein phosphatase non-receptor type 12	Ptpn12	25852000	21069000	26153000	25385000	20240000	15272000	0	20509000	12600000
B1AWT7;F6SPK0;Q3UDP8;Q3TV38;Q9JJZ4	B1AWT7;F6SPK0;Q3UDP8;Q3TV38;Q9JJZ4	Ubiquitin-conjugating enzyme E2 J1	Ube2j1	11146000	14999000	16054000	11844000	14494000	15316000	21067000	13573000	17243000
E9PXB9;Z4YN86;Q9CQ85	E9PXB9;Z4YN86;Q9CQ85	Mitochondrial import inner membrane translocase subunit Tim22	Timm22	17878000	21350000	15440000	18152000	15886000	15323000	0	13603000	9838300
Q3UCS9;A0A0A6YYF0;P30993	Q3UCS9;A0A0A6YYF0;P30993	C5a anaphylatoxin chemotactic receptor 1	C5ar1	0	0	12776000	0	17583000	15381000	0	15900000	14485000
Q9D0Q7;Q9CSZ8	Q9D0Q7;Q9CSZ8	39S ribosomal protein L45, mitochondrial	Mrpl45	25580000	22602000	19787000	17582000	18721000	15403000	13452000	17001000	13483000
Q8C4D5;Q6A0D4;Q80VF9;D3Z731	Q8C4D5;Q6A0D4	Raftlin	Rftn1	15219000	12440000	44903000	0	10951000	15432000	20383000	7455200	0
E9PUG7;Q61211;Q8C8I3	E9PUG7;Q61211;Q8C8I3	Eukaryotic translation initiation factor 2D	Eif2d	25243000	38996000	45757000	0	23877000	15457000	18968000	28720000	25674000
Q8K0B2	Q8K0B2	Probable lysosomal cobalamin transporter	Lmbrd1	15752000	17243000	17586000	16664000	14587000	15474000	21111000	25523000	23845000
Q8BJI6;E9PY51;E9PWG2;Q69ZT3	Q8BJI6;E9PY51;E9PWG2		Trappc8	0	13290000	0	0	0	15490000	13231000	0	0
D3Z3D0;H3BKM2;Q3TI64;Q80YV2	D3Z3D0;H3BKM2;Q3TI64;Q80YV2	Nuclear-interacting partner of ALK	Zc3hc1	19574000	20974000	17766000	21207000	16527000	15528000	19985000	20785000	21339000
Q6PGG6	Q6PGG6	Guanine nucleotide-binding protein-like 3-like protein	Gnl3l	22509000	20941000	17524000	18027000	12343000	15531000	15591000	0	17003000
[truncated: 2,984 more rows]

## Sheet: Table S3
Table S3: Proteins which are identified to be statistically different from the control in cGAMP treatment using Perseus. S0: 0.5, FDR: 0.1. the Intensity is a log2 transformed intensity
[truncated: 405 more rows]

[truncated: 3 more sheets: Table S4, Table S5, Table S6]
